# Supplementary material for: Protein Profiling Gastric Cancer and Neighboring Control Tissues Using High-Content Antibody Microarrays
Source: Microarrays (Basel). 2016 Jul 8;5(3):19. doi: 10.3390/microarrays5030019 (PMC5040966; doi:10.3390/microarrays5030019)
Supplement: Supplementary file 1 [file microarrays-05-00019-s001.xlsx]

## Sheet: targets
Slidenumber		1	2	3	4	5	6	7	8	9	10	11	12	13	14	15	16
GC sample No.		10	11	12	13	14	15	16	1	2	3	4	5	6	7	8	9
Patient gender		male	male	male	male	male	male	female	male	male	male	male	male	female	female	male	male
Patient age		56	72	53	53	60	73	69	84	78	60	71	61	72	77	72	85
Location		corpus	cardia	corpus	spread	spread	corpus	spread	corpus	cardia	cardia	cardia	antrum	antrum	antrum	antrum	antrum
Tumour grade		3	3	1	3	2	3	3	2	2	3	3	4	3	3	4	3
Laureen classification		diffuse	intestinal	intestinal	intestinal	intestinal	intestinal	intestinal	intestinal	intestinal	intestinal	diffuse	mixed	intestinal	intestinal	mixed	mixed
No. of positive lymph nodes		1	21	0	12	10	12	16	1	0	7	5	8	2	0	0	0
Green Channel		Tumour	Normal	Tumour	Normal	Tumour	Normal	Tumour	Normal	Tumour	Normal	Tumour	Normal	Tumour	Normal	Tumour	Normal
Red Channel		Normal	Tumour	Normal	Tumour	Normal	Tumour	Normal	Tumour	Normal	Tumour	Normal	Tumour	Normal	Tumour	Normal	Tumour
Antibody_ID	Uniprot_Name	Array 1	Array 2	Array 3	Array 4	Array 5	Array 6	Array 7	Array 8	Array 9	Array 10	Array 11	Array 12	Array 13	Array 14	Array 15	Array 16
bs_002	MK01_HUMAN	0.403595	0.0202569	0.427317	-0.0195905	-0.266997	4.61896	1.38434	0.53329	0.116445	0.293952	0.73128	0.64816	0.0581413	0.748016	0.596534	0.106127
bs_002	MK01_HUMAN	0.360524	0.141983	0.532024	-0.000752458	-0.322249	4.78428	1.48466	0.522763	0.129394	0.26618	0.793337	0.832247	-0.022205	0.84887	0.657856	0.0506644
bs_009	MK12_HUMAN	-0.0910663	-0.159065	-0.266124	-0.102482	0.110654	5.27253	0.00707343	0.235163	-0.121685	-0.130068	0.0362397	-0.016079	0.016224	0.0175532	-0.265429	-0.0930777
bs_009	MK12_HUMAN	-0.0723423	-0.129575	-0.223965	-0.150718	0.0340091	5.706	0.207409	0.152319	-0.113561	-0.0939944	0.109893	-0.0226645	-0.042735	0.0956292	-0.00942625	-0.0571732
bs_020	SMAD2_HUMAN	0.0235801	-0.356093	-0.157307	0.426854	-0.637568	-0.162474	-0.672917	-0.25506	-0.3703	-0.530698	-0.181505	-0.281441	-0.572337	-0.00181752	0.110197	0.0501934
bs_020	SMAD2_HUMAN	0.255141	-0.438637	-0.144528	0.515994	-0.797304	-0.0864	-0.535825	-0.309052	-0.43095	-0.548952	-0.169657	0.302953	-0.702116	0.0919759	0.280972	0.263812
bs_025	KAP2_HUMAN	0.575395	0.277733	0.276062	-0.0832406	-0.229437	4.46551	1.06639	0.121867	-0.176856	0.40511	0.298323	0.158678	-0.0661112	0.664581	0.261562	0.00295799
bs_025	KAP2_HUMAN	0.420653	0.385098	0.791227	-0.0183526	-0.196064	3.53428	1.97594	0.028234	-0.0998032	0.420661	0.558131	0.491352	-0.106519	0.832025	0.269111	0.35604
bs_026	KAP3_HUMAN	0.224926	-0.415691	-0.034882	-0.548636	-0.301545	4.01515	1.44253	0.110396	-0.216005	0.154514	0.151543	0.186765	-0.091137	0.46532	0.210495	-0.219116
bs_026	KAP3_HUMAN	0.488191	-0.268611	0.323646	-0.521254	-0.477659	4.18944	1.39928	0.025519	-0.137523	0.431496	0.340925	0.49661	-0.29895	0.3761	0.145821	0.249564
bs_032	MP2K4_HUMAN	0.288362	0.600295	0.448831	-0.126862	1.56948	5.18999	1.92163	1.2716	0.452183	1.19878	0.763985	1.46745	0.193482	0.716578	0.333772	0.192982
bs_032	MP2K4_HUMAN	0.33196	0.3402	0.466543	-0.00924563	1.93285	5.19383	2.53061	1.19853	0.586815	1.30882	1.42919	1.73603	0.352456	0.745391	1.11635	0.483948
bs_046	MK08_HUMAN	-0.0949844	-0.407844	-0.457075	-0.0158691	-0.0469889	5.48617	2.15391	0.0190563	-0.475571	-0.288595	-0.0957823	-0.0781185	-0.293435	-0.0577656	-0.333782	0.0332072
bs_046	MK08_HUMAN	-0.127711	0.0167595	-0.493944	0.0128703	-0.0719071	5.46977	3.14016	0.332163	-0.391384	-0.164258	-0.0842823	-0.0888035	-0.349948	0.00703777	-0.153803	-0.239625
bs_052	SMAD3_HUMAN	-0.145144	-0.558455	-0.046415	0.0360978	-0.229317	3.22013	0.630354	0.122189	0.113023	-0.150611	-0.155816	-0.199406	-0.117379	-0.138016	0.553789	-0.204012
bs_052	SMAD3_HUMAN	-0.105447	-0.557097	-0.0135542	0.0443678	-0.351404	3.58367	0.51943	0.168963	-0.043067	-0.260972	-0.0885992	-0.184716	-0.25512	-0.104654	0.673072	0.0406835
bs_053	SMAD7_HUMAN	-0.10316	-0.196564	-0.0325766	0.403401	0.0130376	5.14749	2.11297	0.153486	-0.350591	4.07023e-05	-0.102304	-0.0170834	-0.326028	0.239893	-0.125077	0.810717
bs_053	SMAD7_HUMAN	-0.0628757	-0.175535	-0.301166	0.327073	-0.222251	5.63605	2.18596	0.234878	-0.299296	0.066581	0.0358685	0.11342	-0.400387	0.340607	0.0585532	1.06814
bs_055	MK09_HUMAN	0.391657	-0.128068	0.221014	0.440479	-0.502236	0.109337	0.252492	-0.1581	-0.105479	-0.37333	0.400993	0.384298	-0.117022	0.306641	0.327852	0.765072
bs_055	MK09_HUMAN	0.525479	-0.131809	0.190787	0.363616	-0.667957	0.0976983	0.162504	-0.147427	-0.14839	-0.341827	0.338103	0.355584	-0.184447	0.341088	0.202715	0.234545
db_01	NFAC4_HUMAN	-0.65183	-0.542215	-0.443391	-0.120175	-0.381156	-0.394954	-0.61325	-0.605604	-0.350939	-0.24054	-0.288184	-0.192203	-0.151536	-0.234282	-0.381875	-0.17456
db_01	NFAC4_HUMAN	-0.593665	-0.356359	-0.477992	-0.119605	-0.357651	-0.44185	-0.590712	-0.532867	-0.200716	-0.217524	-0.316344	-0.215899	-0.304871	-0.228713	-0.47765	-0.368862
db_02	YBOX1_HUMAN	0.156439	-0.376259	-0.377134	0.519275	-0.440572	-0.52285	-1.56329	-0.417529	-0.274007	-0.53046	-0.867644	-1.20936	-0.563862	-0.313988	-0.196393	0.104669
db_02	YBOX1_HUMAN	0.257702	-0.424538	-0.313552	0.512191	-0.499558	-0.347588	-1.31535	-0.391797	-0.376081	-0.623908	-0.701805	-1.05527	-0.588746	-0.12684	-0.0722188	0.201499
db_03	AKT3_HUMAN	0.168196	-0.36722	-0.343907	0.522727	-0.453598	-0.386663	-1.42	-0.364655	0.353907	-0.512978	-0.602617	-1.19152	-0.65657	-0.179076	-0.101771	0.695476
db_03	AKT3_HUMAN	0.295067	-0.428947	-0.230951	0.514268	-0.467621	-0.298762	-1.20742	-0.287303	-0.358199	-0.569797	-0.544306	-0.84999	-0.639497	0.00568705	-0.0203164	0.160068
db_04	SOX17_HUMAN	0.712802	-0.0635989	0.19332	0.105879	0.296933	-0.0653724	-0.0462814	-0.0843008	0.0618147	-0.000918149	0.188993	-0.172112	0.159365	0.00544668	0.11869	-0.186019
db_04	SOX17_HUMAN	1.03228	0.0553695	0.186679	0.11428	-0.765311	-0.0508709	-0.0683686	0.0109155	0.077033	0.0160555	0.223799	-0.168784	0.0998808	-0.0965802	0.192607	-0.10727
db_05	JUN_HUMAN	-0.054798	-0.360715	-0.277466	0.317433	-0.411024	-0.349065	-1.01281	-0.412657	-0.436754	-0.570062	-0.398769	-0.884793	-0.370699	-0.112818	-0.426173	-0.0281407
db_05	JUN_HUMAN	-0.127078	-0.331831	-0.154316	0.411626	-0.486659	-0.31366	-0.946377	-0.438977	-0.511179	-0.626082	-0.529026	-1.07987	-0.468984	-0.194403	-0.221401	-0.00336846
db_06	LEG4_HUMAN	-0.528797	-0.289169	-0.203826	-0.064537	0.244362	-0.0708687	-0.482345	-0.223716	0.0402961	-0.179318	-0.0399875	-0.122916	0.313098	-0.271824	-0.543504	-0.0427787
db_06	LEG4_HUMAN	-0.540227	-0.322745	-0.278927	-0.0545872	0.303002	-0.129121	-0.541315	-0.21962	0.030025	-0.193613	-0.00802223	-0.135119	0.206103	-0.285128	-0.575587	-0.0465576
db_07	JUN_HUMAN	-0.0676499	-0.293873	-0.234128	0.246089	-0.354432	-0.288473	-0.885079	-0.139726	-0.168104	-0.418367	-0.291376	-0.198747	-0.522361	0.141602	-0.00039623	0.431447
db_07	JUN_HUMAN	-0.00475288	-0.342903	-0.230435	0.248051	-0.388416	-0.273229	-0.81725	-0.12719	-0.381446	-0.470483	-0.245198	-0.205651	-0.609318	0.165457	0.112565	0.316837
db_08	ACTN2_HUMAN	-0.032448	-0.419131	-0.25627	0.383789	-0.377171	-0.456758	-1.13836	-0.493389	-0.209915	-0.52203	-0.37579	-1.05784	-0.402431	-0.0732898	-0.228923	0.105658
db_08	ACTN2_HUMAN	0.116129	-0.354354	-0.237171	0.309061	-0.453316	-0.460045	-1.19379	-0.526255	-0.331461	-0.619189	-0.424033	-0.93444	-0.526233	-0.058888	-0.159369	0.0138235
db_09	ACTB_HUMAN	-1.35473	0.835433	0.675057	-1.55025	0.731762	0.103217	-1.07203	2.37521	2.00222	1.65422	-1.39928	0.267432	0.246945	-0.26583	0.759791	-0.370624
db_09	ACTB_HUMAN	-1.04971	0.74684	0.291546	-1.60873	0.752986	0.28139	-0.898533	2.42081	2.32388	1.59376	-1.43513	0.179463	0.178819	-0.1779	0.988417	-0.412372
db_10	TBA1A_HUMAN	-0.909954	1.06559	-0.0160582	-1.27027	1.00373	0.30362	-0.736138	1.85501	0.35903	0.219942	-0.742823	0.246255	0.26737	-0.402252	-0.148399	-0.34297
db_10	TBA1A_HUMAN	-1.00236	1.12115	0.0447932	-1.28791	0.769357	0.386426	-0.57768	2.07551	2.13537	0.429664	-0.688598	0.212661	0.290634	-0.133848	0.0472911	-0.303639
db_11	SPI1_HUMAN	-0.543113	0.658592	0.0251069	-0.0584534	0.00104487	0.0967384	0.227009	-0.358227	0.00933112	0.00123132	0.0803177	0.105169	0.24277	-0.154999	-0.527396	-0.102892
db_11	SPI1_HUMAN	-0.539061	0.803879	0.221827	-0.028288	-0.0147844	0.0893327	0.496334	-0.335404	-0.265701	-0.160671	0.190901	0.0373174	0.116225	-0.0932992	-0.444104	-0.36453
db_12	ETS1_HUMAN	-1.52891	0.198106	0.389073	-0.33771	0.136781	0.759379	0.084237	1.7048	-0.26713	0.515205	-0.197377	0.0221065	-0.362223	-0.0432432	-0.239602	0.0452012
db_12	ETS1_HUMAN	-1.39266	0.111916	0.336787	-0.20099	-0.0195058	0.772123	-0.052589	2.70864	-0.10239	0.541616	-0.230653	0.0290111	-0.37784	-0.0452767	-0.457334	-0.0482397
db_13	PO4F2_HUMAN	-0.0575168	0.0440777	-0.0710435	-0.131412	0.810766	0.327083	-0.100622	-0.100058	-0.0711496	-0.0616004	0.147519	0.0109916	0.189866	-0.623404	-0.421108	0.332125
db_13	PO4F2_HUMAN	0.155451	0.263973	-0.0116209	-0.0718693	0.405814	0.163328	-0.0718283	-0.0880297	0.103075	-0.0389824	0.0874423	0.0378665	0.104408	-0.542125	-0.121198	0.436077
db_14	KLF5_HUMAN	0.172143	0.357466	-0.0521412	0.0600493	0.308035	0.435826	-0.028168	-0.0603252	-0.130514	-0.0326878	0.0594735	0.0425925	0.152307	0.0336433	-0.0289571	0.238418
db_14	KLF5_HUMAN	0.228328	0.409427	0.0540349	0.0459574	0.216136	0.0791802	0.0972981	1.88967	0.00172782	0.0405038	0.0696837	0.0856856	0.0964019	0.0623648	-0.0249328	0.567382
db_15	KLF8_HUMAN	0.0524087	0.391047	-0.12804	-0.172538	0.392401	0.0207887	-0.782045	0.0445325	-0.126835	0.405929	0.126332	0.247317	0.137662	0.41371	0.130785	0.755654
db_15	KLF8_HUMAN	0.0541278	0.39903	-0.017439	0.853979	0.227121	0.00170267	-0.760149	0.0786918	0.070932	0.437012	0.0152069	0.225136	0.0580977	0.363625	0.165175	1.15023
db_16	BCL2_HUMAN	-0.0305784	0.887652	0.514861	0.0282619	0.305432	0.690194	1.32022	0.431242	0.342372	0.705007	0.320429	1.47369	0.0505393	0.863213	0.487286	0.332678
db_16	BCL2_HUMAN	0.0653086	0.920519	0.567666	0.0755373	0.480024	0.68728	1.5442	0.693746	0.533616	0.869377	0.687001	1.44478	0.0627234	0.87948	0.755738	0.863234
ec_001	VTNC_HUMAN	-1.11557	-0.610963	-0.510215	-0.901941	-0.923946	-0.767533	-0.994431	-1.1702	-1.80008	-1.09978	-1.82664	-1.71453	-1.6484	-1.78409	-1.92206	-0.365803
ec_001	VTNC_HUMAN	-1.18223	-0.590595	-0.586715	-0.806773	-0.690898	-0.591235	-1.06228	-1.06946	-1.69936	-1.02471	-1.87443	-1.46074	-1.79001	-1.42503	-1.78297	-0.295467
ec_002	CISY_HUMAN	0.187515	-0.203843	-0.225788	0.142739	-0.340497	-0.35532	-0.306574	-0.411734	-0.162202	-0.458004	-0.313904	-0.589906	-0.13427	-0.433655	-0.114099	-0.175048
ec_002	CISY_HUMAN	0.334408	-0.234751	-0.174305	0.19758	-0.586077	-0.36458	-0.380626	-0.458049	-0.192953	-0.548554	-0.454336	-0.840366	-0.307184	-0.576336	0.0733065	-0.204011
ec_003	TSP3_HUMAN	-0.535847	0.0753649	-0.0744734	-0.228273	-0.050769	0.0921023	-0.299472	-0.156189	0.373954	-0.157888	-0.0182547	-0.0833576	0.222405	-0.155038	-0.384293	0.249943
ec_003	TSP3_HUMAN	-0.562354	0.0386447	-0.261477	-0.19524	-0.0372691	0.118041	-0.100578	-0.153618	0.0299569	-0.154113	-0.012566	-0.0930077	0.196141	-0.138607	-0.394445	0.307706
ec_004	TIE1_HUMAN	0.386524	0.395541	0.895991	0.976433	1.39047	0.558155	0.45451	3.9499	0.700924	0.516215	0.436376	-0.0867561	0.562058	-0.114702	-0.284691	0.46246
ec_004	TIE1_HUMAN	0.737735	0.505172	0.767225	0.9343	1.64432	0.901369	0.403486	5.17875	0.983845	0.661851	0.285119	-0.0869569	0.662546	-0.368123	-0.30384	0.49133
ec_005	ZBT17_HUMAN	-0.389895	-0.256347	-0.0785435	0.120203	-0.00895049	0.0815521	-0.381926	-0.0523718	-0.113666	-0.122191	-0.0358676	-0.0249497	0.0219473	-0.151697	-0.20195	-0.132404
ec_005	ZBT17_HUMAN	-0.320671	-0.152599	-0.184329	0.124213	-0.0701071	0.114547	-0.252243	0.0585828	-0.074719	-0.148815	-0.0241462	-0.0829421	0.017433	-0.00536003	0.157485	-0.124788
ec_006	FAK1_HUMAN	-0.192153	0.156867	0.03354	0.26759	0.329138	-0.2323	-0.37238	-0.472085	0.571777	0.361414	-0.116402	-0.254554	0.170242	-0.224662	0.0305518	-0.462787
ec_006	FAK1_HUMAN	-0.170644	0.303744	0.108564	0.574489	0.506559	-0.20968	0.505762	-0.479594	0.604278	0.405447	-0.120691	-0.156255	0.208117	-0.664684	0.300854	-0.481636
ec_007	EWS_HUMAN	-3.87379	-0.32582	-0.33127	-0.599074	-0.461271	0.198282	-0.590485	2.96624	-2.80813	1.13362	-1.15529	-0.182634	-0.839012	-0.738357	-1.53028	-0.0780044
ec_007	EWS_HUMAN	-3.69755	-0.26343	-0.307861	-0.617399	-0.418114	0.115061	-0.493559	3.81531	-1.75742	1.31496	-1.43923	-0.165757	-1.02754	-0.810024	-1.83805	-0.0244517
ec_008	FGF1_HUMAN	-0.00219824	-0.186649	0.011168	0.020458	-0.147363	-0.221182	-0.750994	-0.162565	-0.0776351	-0.27337	0.0042024	-0.37167	-0.0548413	0.0267955	-0.10494	0.129185
ec_008	FGF1_HUMAN	0.0668934	-0.184607	-0.0166558	-0.00206165	-0.220143	-0.215908	-0.201394	-0.0728711	0.0669462	-0.289714	-0.0972886	-0.395204	-0.0547464	0.148838	0.0140943	0.0304759
ec_009	ZN124_HUMAN	-0.486192	-0.875315	-0.664361	-3.42596	0.0982648	-0.649932	0.441299	1.1332	0.334762	-1.23913	0.578495	-0.189857	1.4691	-0.973276	-0.556141	-0.866208
ec_009	ZN124_HUMAN	-0.560504	-0.833613	-0.590253	-3.25901	0.0437529	-0.806274	0.446088	1.01623	0.635203	-1.22931	0.404103	-0.422897	1.07489	-1.11821	-0.70215	-0.943301
ec_010	PNISR_HUMAN	0.314864	-0.28276	-0.22412	0.306449	-0.251991	-0.415616	-1.02701	-0.200916	-0.0954225	-0.402258	-0.399846	-0.806935	-0.148833	-0.111505	-0.15009	-0.00878066
ec_010	PNISR_HUMAN	0.00340994	-0.134433	-0.172428	0.351706	-0.404907	-0.341231	-1.05674	-0.124243	-0.0676344	-0.346668	-0.484425	-0.85971	-0.324956	-0.17955	-0.0424754	-0.0301378
ec_011	RAB5B_HUMAN	-0.304454	-0.154251	-0.0222213	0.170083	0.154437	0.0141253	-0.38317	1.96343	-0.144437	-0.0284613	-0.241894	-0.146331	0.0767583	-0.0192231	-0.0409927	-0.109888
ec_011	RAB5B_HUMAN	1.23974e-05	-0.125573	0.0270376	0.145809	-0.000686896	-0.32881	-0.373141	0.196437	-0.0929328	-0.0949092	-0.254136	-0.143193	-0.0507886	-0.0345934	-0.151094	-0.0999735
ec_012	AK1C3_HUMAN	-0.178311	0.280188	0.0524469	0.380278	0.646066	-0.169295	-0.0438897	-0.0783802	0.855483	0.383557	0.052621	-0.575403	0.286704	-0.278362	-0.0698052	-0.478528
ec_012	AK1C3_HUMAN	-0.036351	0.24544	0.0239899	0.360244	0.148656	-0.271128	0.031192	-0.0539299	0.774236	0.439986	0.0290134	-0.343606	0.28155	-0.337059	0.0355466	-0.511755
ec_013	RA51C_HUMAN	-0.123595	-1.05367	-0.976483	2.01908	-2.34125	0.290054	-0.295242	0.326078	-1.10504	-0.43235	-0.727082	0.747551	-1.11878	-1.98146	2.62498	0.627106
ec_013	RA51C_HUMAN	-0.0980076	-0.976565	-0.835304	2.09689	-2.22462	0.264542	-0.254137	-1.08377	-0.572905	-0.378791	-0.697699	1.47863	-0.595747	-2.01759	3.024	1.02219
ec_014	HERP1_HUMAN	0.607623	-0.423281	-0.126957	0.338112	-0.325123	-0.41522	-0.528404	-0.0899781	-0.0777247	-0.39493	-0.14763	-0.35651	-0.467633	-0.0968491	0.10983	0.271729
ec_014	HERP1_HUMAN	0.270203	-0.305823	-0.0960705	0.363211	-0.559352	-0.24929	-0.486501	-0.266624	-0.125074	-0.402543	-0.15726	-0.647257	-0.554323	0.070158	0.244742	0.659973
ec_015	GRN_HUMAN	0.0884724	-0.0987806	-0.20685	0.981456	0.343438	-0.837024	-0.0766982	-0.608999	0.874036	0.320163	-0.270199	-1.52555	0.286832	-0.984849	-0.136799	-0.992487
ec_015	GRN_HUMAN	0.305829	0.357942	-0.199235	0.922358	0.296795	-0.826652	0.137226	-0.530447	0.336056	0.378686	-0.275185	-1.61085	0.455548	-1.10099	0.065093	-0.474586
ec_016	LY6K_HUMAN	-0.640128	-0.683919	-0.358369	-0.768948	-0.52525	-0.47827	-0.596849	-0.645327	-1.35571	-0.714543	-1.18581	-1.09271	-1.22845	-0.840682	-1.0015	-0.480877
ec_016	LY6K_HUMAN	-0.501289	-0.675058	-0.213418	-0.77995	-0.684054	-0.514382	-0.366105	-0.707204	-1.74906	-0.775833	-1.38023	-1.27811	-1.45661	-0.942543	-1.07203	-0.454423
ec_017	BRAF_HUMAN	-0.441893	-0.200311	-0.0945354	-0.498556	-0.266269	-0.128636	-0.0957344	1.9302	-0.855248	-0.308946	-0.635639	-0.432567	-0.777767	0.519681	-0.63614	0.124258
ec_017	BRAF_HUMAN	-0.47109	-0.187843	-0.0108559	-0.480342	-0.234614	-0.0153739	0.319686	2.0631	-0.734963	-0.301319	-0.788183	-0.15057	-0.638244	-0.0852225	-0.703007	0.154778
ec_018	CXCR5_HUMAN	-0.0323747	0.184343	0.0349726	-0.159993	-0.0960905	0.134852	0.163509	-0.0269988	-0.141069	-0.194701	0.00541517	0.073975	0.0273465	0.0483348	-0.0650995	0.164451
ec_018	CXCR5_HUMAN	-0.0127487	0.311078	0.142781	-0.0933915	-0.137097	0.241713	0.363546	0.108555	0.0330391	-0.0647358	0.110885	0.266432	-0.0815222	0.288615	0.149808	0.307923
ec_019	PRIO_HUMAN	0.924717	-0.0834656	0.493293	0.0392263	0.475464	0.913451	0.510936	-1.12478	0.717634	-1.20507	2.15451	0.459133	1.09051	0.0084177	2.00504	1.76524
ec_019	PRIO_HUMAN	0.92332	-0.193276	0.536175	0.0486364	0.479358	1.18471	0.513392	-1.31025	0.754012	-1.24502	1.94056	-0.113892	1.039	0.194129	1.94212	1.38035
ec_020	MAGA8_HUMAN	0.107438	0.307512	0.0528869	1.06409	0.767316	-0.204685	-0.414645	-0.551067	1.36742	0.530225	-0.156964	-0.412503	0.542068	-0.692702	0.0409359	-0.53705
ec_020	MAGA8_HUMAN	0.274209	0.290799	0.0918964	1.1567	1.01367	-0.191127	-0.511475	-0.599781	1.7974	0.574953	-0.240873	-0.541625	0.590786	-1.34416	-0.0649732	-0.41874
ec_021	CBX3_HUMAN	-2.60194	-3.62315	-3.43491	-2.231	-4.23988	-2.36308	-0.967616	-3.19106	-3.58773	-3.52057	-2.69966	0.111619	-2.97831	-3.53191	-0.515129	-1.99271
ec_021	CBX3_HUMAN	-2.36247	-3.38217	-3.40366	-2.94828	-4.86133	-2.3356	-1.76773	-3.20006	-2.39976	-3.42684	-2.46229	-0.577552	-3.78727	-4.00296	0.324093	-1.92323
ec_022	K2C4_HUMAN	-2.14644	-4.63231	-3.85845	-2.6876	-4.76026	-2.26117	-1.39869	-3.51762	-3.74115	-3.69741	-2.66068	-0.546367	-3.15136	-3.87763	0.472626	-1.80475
ec_022	K2C4_HUMAN	-2.64805	-4.02055	-3.75781	-2.74153	-5.20847	-2.01478	-2.07372	-3.59479	-3.67611	-3.631	-2.9037	-0.449342	-3.72074	-4.03245	0.374042	-1.75749
ec_023	NMDE3_HUMAN	-0.393156	-0.133711	-0.229509	0.799348	-0.0585677	-0.496835	-0.999337	-0.0970085	0.37572	0.264841	-0.379341	-0.110291	0.222403	-0.412969	-0.176687	-0.602984
ec_023	NMDE3_HUMAN	-0.290214	0.13343	-0.164969	0.813323	-0.187919	-0.317766	-0.889531	-0.327662	0.380199	0.534548	-0.304155	-0.657383	0.107901	-0.552304	-0.0534819	-0.887317
ec_024	ID1_HUMAN	0.550139	-0.270814	-0.0981024	0.267725	-0.484392	-0.359222	-0.268908	-0.337178	-0.127122	-0.38973	-0.233736	-0.476487	-0.171548	-0.351365	0.219844	-0.153176
ec_024	ID1_HUMAN	0.579329	-0.402408	-0.171416	0.263672	-0.527587	-0.370437	-0.726255	-0.322711	-0.0360611	-0.445573	-0.393991	-0.702976	-0.362145	-0.254937	0.0166867	-0.256886
ec_025	OSTP_HUMAN	-0.135008	-0.0354247	-0.155448	-1.41931	0.132834	0.0908804	0.0873647	0.448724	0.0591801	0.0542964	0.307471	-0.152624	0.375963	0.0372595	-0.630016	0.0297213
ec_025	OSTP_HUMAN	-0.0948345	0.0561589	-0.162632	-1.33157	0.19898	0.232821	0.174696	0.592091	0.104863	0.0701828	0.132348	0.0945601	0.43669	0.204924	-0.210205	-0.252196
ec_026	MPP3_HUMAN	-0.101405	0.499669	-0.398698	0.105408	2.23701	-0.0398891	0.379079	0.411594	0.810169	-0.0873151	0.513079	-0.0362758	0.713432	-0.22099	-0.0156293	-0.488413
ec_026	MPP3_HUMAN	-0.124465	0.449212	-0.400016	0.255745	2.30311	0.0330388	0.418418	0.345275	1.60113	0.0586749	0.783243	-0.489492	1.43015	-0.730399	-0.00832643	-0.401267
ec_027	CLD3_HUMAN	0.247415	-0.0389841	-0.0154935	0.116687	-0.104057	0.0712705	-0.00890823	0.904809	0.279696	0.347256	-0.073544	-0.0657577	0.028881	0.0740719	0.103655	0.00279411
ec_027	CLD3_HUMAN	0.0283209	-0.0682132	0.00699868	0.114285	-0.239702	-0.0455233	-0.184586	0.806747	0.138596	0.232273	-0.0668273	-0.0919583	-0.00429311	0.15826	0.31307	0.0639131
ec_028	SOS2_HUMAN	0.746698	-0.224142	-0.104714	0.372269	-0.487612	-0.417198	-0.581041	-0.0471908	0.0389506	-0.0927617	-0.462714	-0.6722	-0.332094	-0.47173	-0.0448075	-0.0323591
ec_028	SOS2_HUMAN	0.320741	-0.305669	-0.143792	0.342981	-0.646152	-0.467524	-0.75232	-0.070885	-0.167466	-0.382994	-0.634143	-0.903532	-0.425437	-0.565815	0.357027	-0.0680194
ec_029	CP2D6_HUMAN	-1.80646	-1.59473	-1.25724	-2.19715	-1.86769	-1.6904	-1.68678	-0.974046	-3.08645	-1.70294	-3.17518	-2.56302	-2.58822	-2.40216	-2.81117	-1.19246
ec_029	CP2D6_HUMAN	-1.81742	-0.834358	-1.2479	-2.01572	-1.75618	-1.47987	-1.67203	-1.09435	-2.56626	-1.37949	-3.23545	-2.48283	-2.4849	-2.43648	-2.92681	-0.991633
ec_030	BHE40_HUMAN	1.33333	-0.38537	-0.310945	0.444822	-0.583779	-0.431717	-1.34545	-0.176012	-0.223199	-0.535356	-0.547769	-1.08252	-0.563906	-0.152658	-0.0129995	-0.0459861
ec_030	BHE40_HUMAN	0.497283	-0.396979	-0.274032	0.472255	-0.650864	-0.309687	-1.13197	0.674366	-0.367957	-0.588977	-0.629629	-1.09802	-0.714377	-0.0656895	0.239409	-0.0906811
ec_031	LMAN2_HUMAN	0.59953	-0.254853	0.0689963	0.323719	-0.302149	-0.339131	-0.723805	0.0399952	0.00950434	-0.0987387	-0.378376	-0.505079	-0.357968	-0.379195	0.323396	-0.183794
ec_031	LMAN2_HUMAN	0.844716	-0.110433	0.0036731	0.330336	-0.343134	-0.36184	-0.702741	0.139726	-0.100527	-0.216893	-0.577278	-0.506002	-0.501471	-0.262361	0.164572	-0.0043255
ec_032	PGS1_HUMAN	0.0222277	-0.564174	-0.247589	-0.0459887	-0.713661	-0.595104	-1.1045	-0.575695	-0.542806	-0.731235	-1.16327	-1.45393	-0.800227	-0.313938	-0.465994	0.0471435
ec_032	PGS1_HUMAN	0.323097	-0.428714	-0.283048	-0.0274446	-1.00551	-0.524915	-1.29299	-0.865518	-0.997866	-0.698139	-1.12616	-1.73189	-1.27091	-0.538743	-0.354608	-0.334213
ec_033	EI2BA_HUMAN	-0.305625	-0.176841	-0.178168	-0.276034	-0.244876	-0.0822547	-0.138388	-0.428673	-0.948183	-0.495022	-0.489585	-0.270049	-0.744771	0.00540626	-0.565407	0.0173564
ec_033	EI2BA_HUMAN	0.0904479	-0.125693	-0.14158	-0.340141	-0.225046	-0.0951952	-0.110325	-0.533508	-1.1077	-0.518864	-0.670767	-0.133952	-0.920583	-0.470611	-0.481927	0.0600863
ec_034	HNRPF_HUMAN	-0.0916795	0.236211	0.0946009	1.57414	1.30326	0.148692	-0.31143	-0.207554	1.81052	0.116112	0.384652	-0.174401	1.24637	-1.16276	-0.132182	-0.205175
ec_034	HNRPF_HUMAN	0.0349462	0.137836	0.131809	1.68332	1.36602	0.205363	-0.378078	-0.399549	1.92902	0.0758755	0.262086	-0.127173	1.2708	-1.09547	0.172215	0.239001
ec_035	IF4B_HUMAN	-0.508972	-0.0296916	0.653751	-2.75722	0.681307	1.37921	3.30107	2.74268	0.584551	0.152529	0.187146	0.389664	0.98436	-0.0568822	-0.86538	0.40376
ec_035	IF4B_HUMAN	-0.318924	0.0567849	0.69769	-2.78732	0.797546	1.25537	3.34005	2.4476	0.553353	0.137585	-0.175458	0.353031	1.09404	-0.717662	-1.25362	0.487199
ec_036	ENPL_HUMAN	-0.264267	0.22408	0.354011	0.629463	1.01023	0.0275058	-0.149477	2.12004	1.1593	0.474246	0.0572553	-0.439249	0.479458	-0.258616	-0.494836	0.0537713
ec_036	ENPL_HUMAN	-0.128635	0.360882	0.326032	0.707081	0.993532	-0.098731	-0.189969	0.0946677	1.39418	0.510426	-0.0284183	-0.523592	0.505522	-0.58922	-0.448333	0.072124
ec_037	CUL2_HUMAN	-0.230375	0.0619872	0.407031	-0.380386	0.154386	0.359616	0.719966	0.224635	0.00791856	0.309751	0.317369	0.616349	0.0768474	0.402304	-0.0359011	0.135765
ec_037	CUL2_HUMAN	-0.229114	0.101548	0.196875	-0.322998	0.119375	0.474782	0.650929	0.270103	0.0626171	0.336553	0.43362	1.00202	0.0830757	0.429521	0.131623	0.121056
ec_038	IL2RG_HUMAN	-0.764237	-0.221532	-0.397458	0.426559	0.319554	-0.274106	-1.11169	-0.127299	-0.0052004	-0.0953203	-0.0251872	-0.0764223	0.226618	-0.14457	-0.352711	0.413791
ec_038	IL2RG_HUMAN	-0.735413	-0.320901	-0.352356	0.0966392	0.351792	-0.117513	-0.808296	-0.155411	0.00726405	-0.119296	-0.0105113	-0.091589	0.216206	-0.137488	-0.341718	0.0837067
ec_039	WDR1_HUMAN	0.0745722	-0.301837	-0.165921	0.412893	-0.331535	-0.347416	-0.982881	-0.271727	-0.210114	-0.451462	-0.299671	-0.863736	-0.379102	0.0518722	-0.0844747	0.387808
ec_039	WDR1_HUMAN	0.339878	-0.334903	-0.123621	0.444272	-0.323261	-0.316451	-0.898308	-0.189296	-0.337239	-0.527537	-0.32776	-0.591616	-0.437555	0.122735	0.000981693	0.252955
ec_040	ETS2_HUMAN	-1.14318	-0.133563	-0.074971	-0.351498	0.332901	-0.369897	-0.167622	1.07847	0.590539	-0.183509	-0.198069	-0.808411	0.353926	-1.064	-1.24317	-0.639929
ec_040	ETS2_HUMAN	-0.859159	-0.0688355	-0.108358	-0.273047	0.303387	-0.414294	-0.245447	0.491672	0.870798	-0.207672	-0.0902662	-0.821108	0.639253	-1.45525	-1.38102	-0.41518
ec_041	MOT4_HUMAN	-0.00100978	0.018788	-0.115335	-0.193797	-0.0668623	0.0580257	-0.0182469	-0.104845	-0.103839	-0.0686404	0.0250198	-0.0195302	0.0816299	0.289116	-0.111996	0.273542
ec_041	MOT4_HUMAN	-0.200712	0.0647104	0.0816885	-0.189622	-0.00420406	0.134165	0.123276	-0.0122343	0.000435615	0.0419925	0.1164	0.0778179	0.0624666	0.390757	0.0546581	0.251515
ec_042	NUPR1_HUMAN	-0.242266	-0.032628	0.0781235	-0.293807	-0.11844	0.373205	0.458364	0.154143	-0.00407483	0.0438469	0.563963	0.47384	0.0517234	0.712199	0.0930536	0.0644033
ec_042	NUPR1_HUMAN	-0.0840048	0.0164477	0.159915	-0.281418	-0.0548082	0.29791	0.727757	0.123579	-0.0625612	0.0604181	0.385709	0.464794	0.167238	1.31555	0.228385	0.0581662
ec_043	CDC5L_HUMAN	-0.319814	-0.31426	-0.233025	-0.0245203	0.230205	-0.325054	-0.451613	1.4296	-0.0985909	-0.0581176	-0.142218	-0.0982878	0.111847	0.0951122	-0.366251	-0.0696361
ec_043	CDC5L_HUMAN	-0.222677	-0.293463	-0.109073	-0.00975989	0.152755	-0.528347	-0.142735	1.69733	0.0616229	-0.0438652	-0.111231	-0.0995319	0.0570906	0.155309	-0.231251	-0.0147254
ec_044	SEP15_HUMAN	0.0420108	1.33268	1.54641	1.64922	0.558977	2.44253	1.26424	2.92212	-0.197586	0.373767	0.558898	0.636629	0.469907	2.01641	0.101097	1.82165
ec_044	SEP15_HUMAN	0.02466	1.73477	1.56909	1.91917	0.506483	2.81277	1.45425	3.51578	-0.393614	0.634028	0.759678	0.804555	0.535521	2.40121	0.103226	2.09525
ec_045	FANCC_HUMAN	-0.552418	0.11269	-0.0654016	-0.579836	-0.16405	0.229321	0.108526	-0.206982	-0.867196	-0.0970438	-0.310547	0.0587833	-0.630775	-0.114181	-0.457255	-0.328203
ec_045	FANCC_HUMAN	-0.37694	-0.0788478	-0.0331287	-0.461952	-0.14872	0.345855	0.468308	-0.279208	-0.879938	-0.130408	-0.339216	0.170116	-0.590079	0.0393357	-0.35762	-0.060369
ec_046	MYH11_HUMAN	1.13162	-0.453968	-2.50387	2.27732	-2.76014	0.0870371	-0.461108	-1.40223	0.077608	1.76443	-1.27987	0.894999	-2.09451	-1.39954	3.66319	-0.466873
ec_046	MYH11_HUMAN	1.01106	-0.363079	-2.54424	2.28106	-2.79872	-0.0545849	-0.378616	-1.285	0.228305	1.755	-1.24562	0.917653	-2.07927	-1.415	3.34856	-0.374649
ec_047	PDCD2_HUMAN	-0.0341689	0.0443063	0.0586495	-0.290401	-0.0184374	0.276766	0.37383	0.19014	-0.0964187	0.0708909	0.137352	0.388128	0.0205101	0.26643	-0.343515	0.00784217
ec_047	PDCD2_HUMAN	-0.0976519	-0.0301486	0.0139645	-0.396899	0.0176889	0.314657	0.630937	0.16038	-0.122827	0.181574	0.107481	0.446016	0.0241117	0.394703	-0.230728	0.178178
ec_048	SRGEF_HUMAN	-0.362075	0.135698	0.186724	-0.244411	-0.313969	0.568033	0.620258	-0.0373365	-0.068429	0.0538517	0.338567	0.708722	-0.126219	0.512676	0.107935	0.331354
ec_048	SRGEF_HUMAN	-0.287929	0.0349505	0.114952	-0.25404	-0.187132	0.470758	0.576138	0.0368076	-0.322165	0.0817756	0.478506	0.97843	-0.043378	0.654292	0.170183	0.114144
ec_049	SYSC_HUMAN	-0.281665	0.048681	0.0588019	-0.352203	0.160568	0.356199	0.643751	-0.128434	-0.345255	0.0104726	0.442615	0.666024	-0.201935	0.36847	-0.131006	0.328563
ec_049	SYSC_HUMAN	-0.183197	0.054996	0.0692812	-0.303979	0.108282	0.665906	0.932629	-0.138315	-0.395903	0.00228953	0.581421	0.811644	-0.185483	0.0140421	-0.0502892	0.389255
ec_050	PAPOA_HUMAN	-0.121266	0.224959	0.00339239	0.361759	-0.127203	0.249957	0.0320463	0.19964	0.569631	-0.02157	0.0199596	0.829177	-0.128203	0.023404	0.0296998	0.335753
ec_050	PAPOA_HUMAN	-0.0851546	0.204299	0.0419532	0.133952	-0.100292	0.228716	0.228647	0.189179	0.453886	-0.00704913	-0.0705682	0.52167	-0.198452	0.331593	0.197803	0.556869
ec_051	MAGD2_HUMAN	-0.15567	0.109776	-0.0296713	-0.39125	-0.190566	0.133987	0.355497	-0.0392539	-0.0432002	0.341323	-0.0227287	0.959331	0.27149	0.00742908	0.120584	0.291113
ec_051	MAGD2_HUMAN	-0.0491319	0.134616	-0.122036	-0.428399	-0.272589	0.129899	0.192291	-0.088928	-0.0418319	0.37723	-0.131488	0.773359	0.153935	-0.0282323	0.00711279	0.33374
ec_052	SPS2L_HUMAN	-0.141657	0.263646	0.138357	-0.195584	0.124401	0.374032	0.530802	0.149683	0.0869019	0.253537	0.154888	1.25202	0.0545999	0.409614	0.0723234	0.350892
ec_052	SPS2L_HUMAN	-0.142217	0.169188	0.0796623	-0.266172	0.0559266	0.334851	0.600509	0.223655	0.343961	0.373976	0.0589783	0.624607	0.0823074	0.646277	0.144179	0.347845
ec_053	SC16A_HUMAN	0.392131	-0.108889	-0.0402978	-0.190741	0.0034342	0.0632002	0.36799	0.0577516	0.436223	0.388131	-0.193147	0.218283	-0.0499992	0.0557399	-0.0663133	-0.164015
ec_053	SC16A_HUMAN	0.0441478	0.00266874	-0.0467189	-0.15586	-0.0585908	0.00428118	0.149312	0.169251	0.295184	0.0207379	-0.0136195	0.117211	-0.0772513	0.0460575	0.0776985	-0.121065
ec_054	KLK11_HUMAN	-0.125204	-0.185828	0.238504	-0.204065	-0.0834401	0.151802	0.556432	0.195514	0.0471202	0.518072	0.11394	0.391693	-0.105804	0.307569	-0.2213	0.0584932
ec_054	KLK11_HUMAN	-0.00162604	-0.0855999	0.109064	-0.238586	0.0139977	0.512711	0.753729	0.611696	0.0162772	0.210802	0.234137	0.343313	0.0210251	0.244214	0.0473443	0.0693679
ec_055	DHSB_HUMAN	1.00982	0.054232	1.32759	0.211233	0.314467	0.415062	1.17464	-0.400199	-0.0820211	-0.58598	1.70905	-0.90773	0.743214	1.07211	0.465941	0.625496
ec_055	DHSB_HUMAN	1.70253	0.179453	1.25701	0.216633	0.437548	0.738623	1.34222	-0.293113	0.0685443	-0.482333	1.81864	-0.754353	0.867044	1.15405	0.736211	0.714249
ec_056	TCPB_HUMAN	-0.290013	0.0444879	0.0438895	-0.000735002	-0.0776218	0.0275842	-0.262287	-0.112752	-0.161209	-0.172132	-0.0200573	-0.0819384	-0.0376639	0.183378	-0.15319	0.045397
ec_056	TCPB_HUMAN	-0.183737	-0.026037	-0.0294073	-0.0917277	0.0455993	0.092757	0.0219129	-0.0572141	-0.099004	-0.0382627	0.12651	0.115752	-0.0810869	0.35053	0.282847	-0.0215341
ec_057	VAS1_HUMAN	-0.191463	0.0243291	-0.192165	-0.0180439	0.181026	-0.0438421	0.0102012	-0.341804	0.589224	0.533688	-0.296692	-0.701507	0.213032	-0.672302	-0.126225	-0.42032
ec_057	VAS1_HUMAN	-0.114108	0.205721	0.219136	-0.049191	0.0836551	0.0850424	0.546567	-0.306374	0.650336	0.532667	-0.149921	-0.312456	0.171746	-0.393297	0.0105732	-0.419566
ec_058	CTRB1_HUMAN	-0.466394	-1.09284	-1.8635	-3.94709	-2.17881	-1.15588	-0.886462	-0.633049	-0.704177	-1.15536	-1.4633	-0.215634	-1.21454	-0.79424	-2.73199	-1.4817
ec_058	CTRB1_HUMAN	-0.747139	-1.91816	-1.89534	-3.67322	-2.6352	-0.872234	-0.879586	-0.679379	-0.603709	-0.999676	-1.46539	-0.530272	-1.1863	-0.693196	-2.89443	-1.21542
ec_059	PHB_HUMAN	0.0506406	-0.0770274	0.263606	-0.304564	0.135698	0.188399	0.569814	0.589593	-0.0445313	0.0977972	-0.0147962	0.566672	0.153219	0.226121	-0.299647	0.161214
ec_059	PHB_HUMAN	-0.00693247	-0.00785826	0.421927	-0.179087	0.048825	0.1504	0.744084	0.666888	0.0975933	0.250442	0.0977568	0.561072	0.227891	0.298526	-0.226076	0.150117
ec_060	BRPF3_HUMAN	0.0667365	0.179641	0.00415946	-0.155157	0.0716235	0.355208	0.0124765	0.67722	0.0747607	-0.120455	-0.0610634	-0.0109305	-0.134707	0.208537	-0.528683	0.117477
ec_060	BRPF3_HUMAN	0.126468	0.0279041	0.00128336	-0.200259	0.0847525	0.126468	0.144049	3.39475	0.20302	-0.0904171	-0.144324	-0.189864	-0.0960583	0.0985317	-0.505001	-0.0287925
ec_061	RHDF1_HUMAN	-0.00732362	0.341889	-0.340853	-0.0502111	2.25979	0.223422	0.540435	-0.788317	0.576194	-0.683319	0.618693	0.0121217	0.746263	-1.44396	0.219874	-0.863512
ec_061	RHDF1_HUMAN	0.123423	0.362574	-0.370351	0.155073	1.82884	0.516457	0.648155	-0.83953	0.732307	-0.528119	0.439752	-0.213133	1.24548	-1.52141	0.293132	-0.239405
ec_062	TIMP1_HUMAN	0.328043	0.137811	-0.0625701	-0.652634	0.443612	0.206672	0.262189	0.0268812	0.31999	2.42263	-0.797428	-0.175969	-0.0257792	0.0496211	0.393331	-0.0189496
ec_062	TIMP1_HUMAN	0.510203	0.202031	0.183394	-0.559872	0.602726	0.277912	0.681821	-0.0969236	0.299436	1.68553	-0.857363	0.302928	-0.202324	0.11145	0.663974	0.374758
ec_063	TIMP2_HUMAN	0.209234	0.105989	0.126927	-0.0342254	0.0630098	0.342391	0.440415	0.307465	-0.274712	0.161788	0.216702	0.087371	0.151752	0.178173	0.190715	0.0235468
ec_063	TIMP2_HUMAN	0.291726	0.036482	0.326324	-0.185926	0.156837	0.43627	0.912523	1.89741	0.00231506	0.111775	0.2631	0.139271	0.0902743	0.180641	0.28274	0.337914
ec_064	PDIA6_HUMAN	-0.14754	-0.164293	0.337038	0.416483	-0.835204	0.374057	0.545581	0.274995	-0.322143	-0.380105	0.295504	1.40283	0.130022	0.181639	1.77597	0.715306
ec_064	PDIA6_HUMAN	-0.0301873	-0.175838	0.310068	0.274713	-0.853376	0.537614	0.498284	-0.589487	-0.240186	-0.374423	0.256278	1.69149	0.271786	-0.0291563	2.18573	0.50481
ec_065	DDX17_HUMAN	-0.444161	-0.162851	-0.242705	-0.0907997	0.183265	-0.090134	-0.441462	-0.165165	-0.00404004	-0.174755	-0.0303047	-0.124207	0.22697	-0.180916	-0.394252	-0.0117853
ec_065	DDX17_HUMAN	-0.415808	-0.166199	-0.212933	-0.0800303	0.193672	-0.112004	-0.451323	-0.174628	-0.0119793	-0.154125	-0.0157376	-0.108362	0.235849	-0.249137	-0.429631	-0.0104115
ec_066	ATP5H_HUMAN	1.03227	0.205955	0.559843	-0.037189	0.076139	0.408833	0.905684	-0.640081	-0.0034061	-0.942866	0.811916	-1.11363	0.506131	0.276225	0.781908	-0.0525918
ec_066	ATP5H_HUMAN	0.939554	0.222107	0.309617	-0.0579175	0.333527	0.438599	0.953049	-0.65627	-0.121617	-1.01359	0.751005	-1.14923	0.625808	0.228878	0.253633	0.255619
ec_067	K1C18_HUMAN	0.637285	-0.593657	-1.31444	-0.613124	-0.212436	-0.0844199	-0.222766	0.254229	0.0169265	-0.0124108	-1.3448	-0.0736811	-0.217946	-0.806404	-0.162416	1.20202
ec_067	K1C18_HUMAN	0.462102	-0.0498484	-0.121144	-1.46551	-1.05274	-0.7397	-0.182667	0.202032	0.0116318	0.0873058	-1.4838	-0.229437	-0.206724	0.069209	-0.179727	0.927705
ec_068	CFTR_HUMAN	-0.126128	0.104955	-0.349174	-1.72089	-0.0529859	0.116435	0.140673	0.0894048	0.0449783	0.0790841	-0.135447	0.374242	-0.155214	0.279106	-0.166613	0.314109
ec_068	CFTR_HUMAN	-0.38202	-0.26647	-0.504408	-1.97517	-0.38996	-0.048308	-0.0418378	0.142477	0.0653417	0.137996	-0.286349	0.0297246	-0.13137	0.169809	-0.674814	0.223055
ec_069	TNPO3_HUMAN	0.507494	0.169475	0.245509	0.325333	2.89922	-0.00836584	1.00268	-0.157185	0.018261	-0.725007	0.109402	-1.40637	1.12227	-0.675092	2.95471	-0.463267
ec_069	TNPO3_HUMAN	0.563008	0.221294	0.226605	0.332755	2.90805	0.025754	0.904576	0.00787534	0.14509	-0.644242	0.288265	-1.56562	1.44584	-0.562112	3.13316	-0.369807
ec_070	APEX1_HUMAN	0.386302	-0.393678	-0.0326048	0.139153	-0.672874	-0.402513	-0.457589	-0.320652	0.0164113	-0.296719	-0.262897	-0.666762	-0.0987729	-0.463073	0.317703	-0.289122
ec_070	APEX1_HUMAN	0.418062	-0.509997	0.0948256	0.15104	-0.556355	-0.327606	-0.667628	-0.307311	-0.0993856	-0.174287	-0.42169	-0.523086	-0.277862	-0.531816	0.123788	-0.427441
ec_071	RLA0_HUMAN	-0.11791	0.0017844	0.0343621	-0.130303	-0.0438378	0.0331836	0.226731	-0.0677341	-1.20104e-05	0.0575531	0.0673459	-0.352257	0.163075	0.251132	0.122158	-0.0457093
ec_071	RLA0_HUMAN	0.110169	-0.0789984	0.0127404	-0.102477	-0.052194	0.0413958	0.245845	-0.0237885	0.0691265	0.149324	0.146824	-0.368426	0.171743	0.497418	0.237478	-0.131029
ec_072	VEGFB_HUMAN	-0.155672	0.124901	-0.0356741	-0.0196329	0.0557265	0.197795	-0.189095	-0.10906	-0.158806	-0.241938	-0.0706991	-0.217773	0.0279311	0.133017	-0.299325	0.089281
ec_072	VEGFB_HUMAN	-0.0750745	-0.202883	0.143499	-0.079304	-0.0382555	0.468162	0.410312	-0.0421778	0.139355	0.0359771	0.0295563	0.110501	-0.138119	0.16904	0.441521	-0.00628624
ec_073	VGFR2_HUMAN	-0.0385678	-0.279738	-0.0341531	0.025325	-0.0807623	0.305917	-0.141653	0.0547737	0.0917789	0.00540913	-0.31932	-0.0556181	-0.0733149	0.161795	0.112886	-0.0543139
ec_073	VGFR2_HUMAN	-0.0830248	-0.172999	0.121185	0.0614613	-0.125377	0.17519	-0.016925	0.800797	-0.0763716	-0.0764837	-0.552926	-0.127049	-0.0833405	0.157556	0.0761004	-0.0894306
ec_074	FASTK_HUMAN	0.303264	-0.0280159	0.249327	0.123132	-0.0292827	0.355527	0.181248	0.0540666	0.094337	-0.0153977	0.0619596	-0.0419509	0.467888	0.232669	-0.227373	0.597005
ec_074	FASTK_HUMAN	0.0274249	-0.0426809	0.24169	0.0829401	-0.114742	0.239219	0.136273	0.194443	0.0162531	-0.108493	0.0468702	-0.186689	0.319264	0.17172	-0.117097	0.42944
ec_075	B2CL2_HUMAN	0.721434	-0.0652561	0.107575	0.403399	0.746731	-0.0131947	0.177217	0.334059	0.398358	0.260939	0.0158909	0.13946	0.629297	-0.382401	0.749733	-0.0297307
ec_075	B2CL2_HUMAN	0.371491	-0.178381	0.155492	0.441289	0.895237	0.0596454	0.0939888	0.0959139	0.172278	0.412651	0.064374	-0.0137226	0.630259	-0.332112	1.21792	-0.0328124
ec_076	PLCG2_HUMAN	-0.176585	0.246253	-0.115213	0.491115	0.868375	-0.320544	-0.361267	-0.377359	1.04973	0.164815	0.449398	0.136311	0.355574	-0.560192	0.0979793	-0.525357
ec_076	PLCG2_HUMAN	0.0650946	0.233171	-0.112266	0.434736	1.19739	-0.06095	0.0248852	-0.781017	1.23806	0.0775241	0.563341	0.138092	0.410893	-0.627824	-0.0329273	-0.260682
ec_077	RPN2_HUMAN	0.835734	0.134554	-0.138658	-0.409731	1.10428	-0.3441	0.258207	1.70579	-0.401093	-0.468073	0.458646	-1.09403	-0.0501615	-1.39713	-0.315783	-1.06947
ec_077	RPN2_HUMAN	1.17313	0.239347	-0.348434	-0.404154	1.45899	-0.235353	0.314374	0.40642	-0.381599	-0.542252	0.412297	-1.36109	0.0694149	-1.68127	-0.280253	-0.574047
ec_078	SMAD4_HUMAN	0.13465	0.316558	0.00523174	3.09779	0.334525	-0.0708589	0.1697	1.81261	0.740892	1.03398	-0.0595153	0.943219	0.0874086	0.488578	-0.0505713	-0.285269
ec_078	SMAD4_HUMAN	0.302174	0.594938	0.114272	1.82713	0.147168	-0.0941561	0.298874	1.64102	0.640308	0.784107	-0.269692	0.6238	0.0660243	0.46553	-0.0768834	0.117113
ec_079	RL27A_HUMAN	0.464226	0.165507	0.0749747	0.167841	-0.286226	-0.0503945	0.550965	-0.204723	-0.199397	-0.106081	0.133938	-0.0562981	-0.149839	0.171861	0.161297	-0.203719
ec_079	RL27A_HUMAN	0.788408	0.149011	0.393525	0.00920611	-0.592554	0.094152	0.981494	-0.179712	-0.12188	-0.0473699	0.244563	-0.223263	-0.183769	0.265703	0.618641	0.137015
ec_080	PGS2_HUMAN	0.0586286	-0.303195	0.985378	-0.635436	0.691118	0.0974773	0.537396	0.976335	-0.334164	0.247731	-0.214238	0.0973886	0.0201655	-0.014663	-0.28237	0.111623
ec_080	PGS2_HUMAN	0.269351	-0.337785	0.983231	-0.519821	0.958344	0.00228885	0.61217	1.24451	-0.061423	0.241631	-0.0807769	0.221363	-0.0333947	-0.095752	-0.0799792	0.125601
ec_081	ECHM_HUMAN	0.725215	1.17118	1.23984	-0.228206	1.32822	0.275173	1.11982	-0.695973	-0.427517	-0.232081	1.52987	1.46055	1.48948	0.0188698	1.29203	1.45913
ec_081	ECHM_HUMAN	0.761037	1.02776	1.3182	-0.172282	1.35962	0.315115	1.18149	-0.689803	-0.416695	-0.303484	1.37127	1.38574	1.31967	0.0921529	1.44233	1.53521
ec_082	PLSL_HUMAN	-0.505586	0.0625161	0.133032	-0.0855674	-0.295149	0.245156	0.348902	0.0961684	-0.206139	0.187682	0.296515	0.978393	-0.218741	0.647093	0.128977	-0.149767
ec_082	PLSL_HUMAN	-0.394745	0.0618622	0.155528	-0.0796186	-0.239087	0.362151	0.403369	0.122184	-0.237764	0.427029	0.220309	1.15132	-0.284336	0.749383	0.274117	0.290369
ec_083	GPX1_HUMAN	0.257871	0.139446	0.0247296	1.55031	1.75142	0.0756059	0.0644433	-0.804148	1.89239	-0.272428	0.59496	0.13553	1.92064	-1.72885	1.24849	-0.91849
ec_083	GPX1_HUMAN	0.421999	0.0802498	-0.0222844	1.6264	1.74532	0.104976	0.0897714	-0.698563	1.98961	-0.310572	0.576074	-0.570368	1.61051	-1.12974	0.818826	-0.369315
ec_084	RHOA_HUMAN	0.1784	0.296184	-0.267675	0.667656	2.36168	-0.614719	-0.283123	-0.227134	1.40678	0.287482	0.214033	-0.82045	1.38808	-1.18711	0.27463	-0.997735
ec_084	RHOA_HUMAN	-0.0280053	0.344491	-0.30866	0.761229	2.19475	-0.680844	-0.222511	-0.398167	2.01214	0.232168	0.128187	-1.40069	1.37182	-1.82221	0.498038	-0.829628
ec_085	CXCL9_HUMAN	0.193557	-0.0781591	-0.253587	-0.121074	2.07643	0.028347	0.187065	2.06679	0.802002	-0.00211895	0.332607	-0.709152	0.580809	-0.0328692	-0.205846	-0.509571
ec_085	CXCL9_HUMAN	0.434338	0.477344	-0.269491	-0.0894556	2.53975	0.174564	0.356247	1.59962	0.976961	0.256878	0.556865	-0.442203	0.815788	-0.530323	-0.0805259	-0.474729
ec_086	EGFR_HUMAN	0.0725056	-0.094064	0.28853	-0.306433	-0.100942	0.171469	0.640297	0.151589	-0.126306	0.200211	0.0600043	0.233133	-0.044091	0.234206	-0.181519	-0.0759288
ec_086	EGFR_HUMAN	0.133298	-0.0714161	0.3791	-0.231875	-0.274979	0.421443	1.26887	0.342914	0.0467995	0.521922	0.176502	0.645297	-0.200442	0.705407	0.0278683	-0.0826042
ec_087	HNRPM_HUMAN	-0.248443	0.0721363	0.028337	-0.0837013	0.00266996	0.150499	0.0173857	-0.0217103	-0.182065	-0.14717	0.030796	-0.0441847	0.00430732	0.304972	-0.128405	0.0438133
ec_087	HNRPM_HUMAN	0.250879	-0.0389579	0.0907848	-0.133573	0.043592	0.237192	0.219175	-0.0559441	-0.0782849	0.0104909	0.0952701	0.0691387	-0.0197109	0.365654	-0.0571651	0.00669824
ec_088	RM03_HUMAN	-0.233058	-0.108853	-0.0702555	0.169741	0.130188	0.052499	-0.653044	0.248055	0.0878474	-0.0591632	-0.208606	-0.221581	0.0505086	0.0789458	0.101749	-0.00408127
ec_088	RM03_HUMAN	-0.0668491	-0.252544	-0.20865	0.0797404	0.0722508	0.029941	-0.61023	0.405521	-0.0176973	-0.115543	-0.284592	-0.270843	-0.101653	-0.0488487	-0.0626837	-0.0434761
ec_089	VEGFC_HUMAN	-1.53812	-0.0898338	-0.163084	0.0536106	0.0870655	0.09643	-0.297243	2.32205	-0.0391994	-0.067283	-0.0224578	-0.036886	0.0566738	0.255791	-0.562838	0.137714
ec_089	VEGFC_HUMAN	-1.33476	0.0209334	0.051616	-0.0889864	-0.0150875	0.153618	-0.0214126	2.51117	-0.0590097	-0.105359	0.0566088	-0.00429075	0.0252022	0.368651	-0.642374	0.167898
ec_090	TCPD_HUMAN	0.788568	-0.000500992	-0.10822	-0.53284	0.0334178	0.344383	0.460927	0.316985	0.0607804	0.332222	-0.0510967	0.274043	0.104125	0.573449	-0.520965	-0.0175866
ec_090	TCPD_HUMAN	0.233747	0.0420981	0.0504546	-0.504772	-0.0243987	0.386368	0.863792	0.40805	0.323494	0.282242	0.241544	0.389399	0.00794643	0.825568	-0.359261	0.0293157
ec_091	RPB3_HUMAN	-0.155118	0.141552	0.235081	-0.312187	0.0966849	0.535471	0.929773	0.287992	0.164609	0.524057	0.275479	0.756238	0.0127459	0.447027	0.255486	0.185793
ec_091	RPB3_HUMAN	-0.0449447	0.373406	0.236371	-0.348306	0.193515	0.530427	0.994521	0.413529	0.265213	0.647608	0.416065	0.860448	0.0742998	0.78337	0.387146	0.236048
ec_092	LUM_HUMAN	0.0348476	0.534138	-0.841818	-0.366249	2.64884	0.455979	-0.833994	0.314752	0.501161	0.00557741	1.10268	0.669189	0.254153	-0.0737947	-0.00928364	0.342965
ec_092	LUM_HUMAN	0.180219	0.469375	-0.850275	-0.462708	2.2736	0.802826	-0.729678	0.44752	0.538129	-0.257689	1.38162	0.571069	0.323963	0.239069	-0.101256	0.308717
ec_093	ARVC_HUMAN	0.234423	0.437943	-0.818951	-1.39361	2.28935	0.886679	0.286571	0.748211	-0.28419	-0.721133	1.68869	0.323878	1.54674	-0.853649	0.00655555	0.20092
ec_093	ARVC_HUMAN	0.430338	0.402459	-0.928887	-0.980555	2.71762	0.973708	0.378393	1.05313	0.590189	-0.611968	1.9889	0.209834	0.970774	-1.13715	0.427393	0.298297
ec_094	HS71L_HUMAN	0.747159	-0.15313	-0.263828	-0.928111	0.48448	-0.148084	0.746459	3.44914	0.22922	-0.172215	0.435008	-0.314339	0.795315	-0.582541	-1.36842	-0.177714
ec_094	HS71L_HUMAN	0.721234	-0.0135074	0.251391	-1.00647	0.468914	-0.148265	1.05483	0.767587	0.854211	-0.107508	-0.0938973	-0.600249	1.09444	-0.72444	-1.34711	0.164591
ec_095	K1C15_HUMAN	0.525444	0.56032	-0.545084	-0.465435	0.881808	0.439972	0.485234	1.89333	0.462099	0.0941146	1.25473	0.689165	0.895953	0.0145823	0.0715738	0.345834
ec_095	K1C15_HUMAN	0.365087	0.701215	-0.563703	-0.542369	1.15785	0.40194	0.420825	1.63699	1.43152	-0.0382302	1.82587	0.593438	1.63944	-0.0242524	0.428787	0.782296
ec_096	PIM1_HUMAN	-0.457682	-0.107196	-0.0503072	0.0028583	0.159674	-0.320195	-0.31045	0.226552	-0.147108	0.015201	-0.355697	-0.642929	-0.28556	-0.689011	-0.53349	0.0577713
ec_096	PIM1_HUMAN	-0.239949	0.0450331	-0.121339	-0.0293634	0.266409	-0.442851	-0.318172	0.555988	0.496736	0.234488	-0.359567	-0.999075	0.0688105	-0.814727	-0.526819	-0.205244
ec_097	TAF12_HUMAN	-1.46108	-0.928266	0.173025	-0.658499	-0.366136	0.312257	-0.122105	4.4628	-0.407282	-0.390108	-0.614425	-0.167496	-0.446793	-0.150224	-1.68201	-0.0565662
ec_097	TAF12_HUMAN	-1.67068	-1.00089	0.461707	-0.804058	-0.414262	0.418978	-0.180591	2.19385	-0.675474	-0.484037	-0.747621	-0.26112	-0.712207	-0.205878	-1.67147	0.00295911
ec_098	LYAM1_HUMAN	-0.233999	-0.287707	-0.200794	0.030344	-0.0153015	0.128572	-0.591867	-0.0901937	-0.0198672	-0.180762	-0.130053	-0.165784	-0.0535911	0.120347	-0.258981	-0.00843478
ec_098	LYAM1_HUMAN	-0.0819468	-0.231313	-0.370043	-0.150657	-0.298795	0.140355	-0.569817	0.415773	0.0691468	-0.0693395	-0.1339	-0.159527	-0.0165134	0.132379	-0.310743	0.12966
ec_099	COFA1_HUMAN	-1.202	-0.535314	0.123541	-1.59083	-0.10943	0.252746	0.86649	3.84201	-0.0518798	-0.557854	-0.14501	0.29232	0.231809	-0.13459	-0.334471	0.00693129
ec_099	COFA1_HUMAN	-0.907607	-0.458329	0.0593058	-1.33619	-0.172421	0.166786	0.958532	3.88041	0.0650179	-0.577827	0.0330518	0.232662	0.178545	-1.14668	-0.739752	0.129138
ec_100	MCP_HUMAN	-0.39328	-0.509816	-0.519676	0.242354	0.554079	-0.317145	-0.805058	-0.615272	1.12258	-0.289968	-0.0565606	-0.0849943	0.676135	-1.24902	-0.473345	-0.0501578
ec_100	MCP_HUMAN	-0.225075	-0.492401	-0.526877	0.83548	0.360148	-0.29631	-0.929944	-1.69852	1.16949	-0.345886	-0.0128856	0.0567467	0.816886	-1.79393	-0.336846	0.268514
ec_101	TRAF4_HUMAN	-0.0820081	-0.314971	-0.171355	-0.466348	0.122565	-0.0906329	0.0883175	0.811217	0.318941	0.0102854	-0.0602367	-0.101426	0.110106	-0.217747	-0.736196	-0.0100993
ec_101	TRAF4_HUMAN	0.00898726	-0.236764	-0.187212	-0.440132	0.0730573	-0.0640973	0.209453	0.823863	0.374665	0.0159333	-0.0361911	0.190497	0.127363	-0.136961	-0.548414	-0.342759
ec_102	RHG06_HUMAN	0.0953182	0.369321	0.137784	-0.2665	1.24216	0.530653	0.871926	0.534519	1.27223	-0.482146	1.12934	0.841949	1.73806	-0.277539	1.18969	0.0375621
ec_102	RHG06_HUMAN	0.287891	0.582282	-0.109065	-0.232468	1.2097	1.46252	1.08807	-0.113641	1.53913	-0.360663	1.23797	0.268155	1.83301	-0.170844	0.599871	0.138813
ec_103	AT5G2_HUMAN	-0.313446	-0.0736842	0.990897	-0.600762	0.555221	0.0829112	0.677405	2.6997	-0.00916267	-0.78309	0.934238	-0.802148	0.810252	-0.0386434	-0.923723	0.00684319
ec_103	AT5G2_HUMAN	-0.111328	-0.0565096	0.489255	-0.586535	0.453976	0.160546	1.1611	2.6147	0.101433	-0.865415	1.13865	-0.498713	1.34461	-0.0463076	-0.428875	-0.0317612
ec_104	BPI_HUMAN	0.0971578	0.151191	0.0461773	-0.224451	0.0937076	0.0485856	-0.0178247	0.0608828	0.0109574	-0.0830939	0.0502575	0.172844	0.0605609	0.234312	-0.393529	0.280459
ec_104	BPI_HUMAN	-0.115259	-0.150614	0.0592413	-0.174304	-0.00534133	0.289057	0.612538	0.301378	0.0715742	0.0497052	0.135788	0.54743	-0.121265	0.288652	-0.392718	0.273367
ec_105	PSB4_HUMAN	-0.346271	-0.24013	-0.22731	-0.440612	-0.0894215	0.308489	0.126428	1.23859	-0.151247	0.0322808	-0.0762321	0.0903709	-0.177196	0.289878	-0.917207	0.343536
ec_105	PSB4_HUMAN	-0.0583093	-0.144906	-0.103084	-0.598493	0.0289542	0.266231	0.32801	-0.0924044	0.0468787	-0.0494081	-0.0200436	0.172141	-0.217905	0.504504	-0.987093	0.329835
ec_106	HSP71_HUMAN	0.93564	-0.409713	0.0155723	1.26163	-1.06522	1.79896	-0.900123	-0.58068	-1.19392	0.131783	0.373587	3.71287	-0.306198	0.833856	2.77421	2.80192
ec_106	HSP71_HUMAN	0.976699	-0.344814	0.0854354	1.37875	-1.01707	1.88264	-0.821442	-0.872655	-1.35463	0.0498466	0.417557	3.54977	-0.32895	0.79544	2.85505	2.78477
ec_107	CALX_HUMAN	-0.0750463	0.0962312	0.050752	-0.145507	0.191212	0.0479918	0.0843774	0.0134944	0.240238	0.164065	-0.182663	-0.213729	0.0211471	-0.0479614	0.0332534	-0.126124
ec_107	CALX_HUMAN	0.236226	0.0912028	-0.046974	-0.165309	-0.0142219	0.0872143	0.0984055	0.00948417	0.225357	0.171321	-0.206665	-0.309002	0.12487	-0.131947	0.068487	-0.0266797
ec_108	PACA_HUMAN	-0.510675	-0.333044	-0.522816	-0.234085	-1.47577	-0.686061	-0.254931	-0.188864	0.0365875	-0.305366	-0.588276	-0.29929	-0.521725	-0.892224	-0.214782	-0.82415
ec_108	PACA_HUMAN	-0.489283	-0.456065	-0.498054	-0.173381	-1.69732	-0.654002	-0.463416	-0.629725	0.033324	-0.253833	-0.603921	-0.231254	-0.520059	-1.3498	-0.405575	-0.708736
ec_109	AKT1_HUMAN	0.121813	-0.20104	-0.0150037	1.30059	0.21353	-0.230684	-0.64583	-1.7536	0.791433	-0.0930679	-0.267506	-0.212676	0.159461	-1.46473	0.239502	0.0935274
ec_109	AKT1_HUMAN	0.246215	-0.213766	-0.209921	1.48549	0.190545	-0.185117	-0.621524	-1.30591	0.513153	-0.119418	-0.275095	-0.10523	0.152952	-1.17919	0.148768	0.143954
ec_110	ANXA2_HUMAN	-0.335089	-0.331549	-0.486652	0.761559	0.537333	-0.570942	-0.924616	-1.49657	0.91128	-0.178124	-0.447597	-0.483119	0.306882	-1.15316	-0.632624	-0.21866
ec_110	ANXA2_HUMAN	-0.2553	-0.337772	-0.522278	0.728188	0.722336	-0.468902	-0.411246	-1.55112	1.10662	-0.167772	-0.430549	-0.533836	0.227048	-1.60938	-0.36966	-0.102156
ec_111	BCL2_HUMAN	-0.267354	-0.225318	-0.304744	1.62261	0.800453	-0.364568	-0.678661	-1.88863	1.50263	-0.0291984	-0.301519	-0.447742	0.655709	-1.38702	-0.094687	-0.139685
ec_111	BCL2_HUMAN	-0.152099	-0.230985	-0.185406	1.61847	0.954335	-0.314618	-0.657628	-2.33679	1.59708	-0.0551875	-0.131456	-0.467398	0.699883	-1.5558	0.00364662	-0.051433
ec_112	CP3A7_HUMAN	-0.157293	0.33936	0.23751	-0.166986	0.206396	0.627041	0.55037	0.229855	0.295556	0.291906	0.214725	0.539827	-0.0122353	0.406392	0.00253218	0.554096
ec_112	CP3A7_HUMAN	-0.00845787	0.419519	0.305812	-0.182055	0.320532	0.568018	0.503293	0.0602295	0.221493	0.385213	-0.0500271	0.683433	-0.05018	0.396534	0.196504	0.27884
ec_113	FINC_HUMAN	-0.174231	-0.266026	0.17844	-0.396777	-0.244985	0.357303	0.933869	0.0756673	-0.0779829	0.142012	0.274328	0.589049	-0.253858	0.647076	0.0161869	-0.185737
ec_113	FINC_HUMAN	-0.0978388	-0.343229	0.176304	-0.332881	-0.265148	0.398628	1.14014	0.132071	-0.36355	0.0687561	0.380668	0.873281	-0.258522	0.4714	0.249319	-0.234987
ec_114	CHST4_HUMAN	-0.138736	-0.307792	-0.028031	-0.247457	-0.367965	-0.0223346	-0.093995	0.602878	-0.380176	0.0162213	-0.0550111	-0.0323639	-0.362371	0.142648	-0.175866	-0.0984374
ec_114	CHST4_HUMAN	-0.227074	-0.321385	-0.0645788	-0.348499	-0.484685	-0.0739874	0.320949	1.11321	-0.34914	0.0243978	-0.0574407	-0.0711955	-0.332673	0.107077	0.02834	-0.0641599
ec_115	MYCN_HUMAN	0.0779299	-0.126001	0.0720727	-0.220231	-0.370702	0.172679	0.493376	1.73414	0.0421799	-0.185532	-0.0432653	0.152482	-0.160238	0.380518	-0.142138	0.00263166
ec_115	MYCN_HUMAN	0.0957832	-0.148695	-0.0608069	-0.245671	-0.334638	0.0896224	0.40152	-0.0430198	0.0483287	0.23708	-0.0310205	0.0709162	-0.241603	0.313958	0.0911112	0.00596046
ec_116	ec_116	-0.175208	0.089776	-0.15076	-0.49721	0.146488	1.0931	-0.306576	0.715702	-0.164469	-0.253709	-0.207524	-0.220579	0.0627522	0.0873041	-1.21191	-0.164655
ec_116	ec_116	-0.124108	-0.0324668	-0.284305	-0.287208	-0.0984024	-0.120211	-0.299712	3.40722	-0.265727	-0.342193	-0.202094	-0.406434	-0.0265384	-0.047933	-1.33596	-0.453692
ec_117	NUSAP_HUMAN	-2.0125	0.221291	0.535115	-0.216406	0.696977	0.347064	0.174996	2.76346	0.0881831	0.191017	0.0155195	-1.15711	0.142894	-0.712334	-1.11396	-0.451953
ec_117	NUSAP_HUMAN	-1.66431	0.326493	0.0781718	-0.186418	0.751584	0.337349	0.0780091	2.38383	0.321806	0.0720057	-0.0435414	-0.778857	0.297622	-0.696099	-0.946888	-0.289008
ec_118	TMM54_HUMAN	0.217379	-0.00863729	0.21957	-0.20342	-0.0647309	0.148555	0.15551	0.0868238	-0.0627232	0.384474	0.10396	0.62698	0.00670782	0.396718	-0.0824912	-0.0259586
ec_118	TMM54_HUMAN	0.45954	-0.06568	0.170296	-0.293955	-0.0741729	0.308664	0.763786	0.115236	0.0572816	0.676317	0.294532	1.23772	-0.151369	0.582262	0.0817596	-0.025434
ec_119	TGFB2_HUMAN	0.00758864	-0.00117299	0.0217494	-0.417184	0.111983	0.17661	0.441968	0.0820457	0.179644	0.198479	-0.0682204	0.372407	0.296504	0.290813	-0.283404	-0.0521322
ec_119	TGFB2_HUMAN	0.318059	-0.0264906	0.0553729	-0.391043	0.274059	0.150407	0.285782	0.122678	0.292116	0.181298	0.00169864	0.179434	0.0900173	0.244914	-0.346452	-0.145161
ec_120	AMFR_HUMAN	0.161588	0.220368	0.0090689	-0.284245	0.0359215	0.146084	0.143373	0.012891	0.0166825	-0.0916574	0.0255569	0.0154243	0.0195698	0.248031	-0.333877	0.0401752
ec_120	AMFR_HUMAN	0.165952	-0.0502576	0.0121119	-0.324159	-0.0410736	0.128262	0.802443	0.0655785	0.491755	-0.0775518	0.0401498	0.0519509	0.0162734	0.630226	-0.339874	0.0353443
ec_121	SPIT2_HUMAN	-0.0257023	0.0702937	0.0618887	-0.30556	0.114914	0.324288	0.326018	0.26781	0.0965001	0.252273	0.233775	0.345168	0.123539	0.352088	0.0206574	0.134228
ec_121	SPIT2_HUMAN	0.146239	0.182648	0.445453	-0.255564	0.0904533	0.334924	0.643642	0.275696	0.0388703	0.271439	0.287389	0.567322	0.164364	0.746295	0.117263	0.240324
ec_122	BRAF_HUMAN	-0.148641	0.133103	0.134806	-0.278263	-0.0297649	0.730919	0.326187	0.124743	-0.138275	0.229116	0.185323	0.409768	0.0153414	0.634154	0.180402	0.100727
ec_122	BRAF_HUMAN	0.00305442	0.202036	0.171557	-0.251703	0.0571896	0.241901	1.36986	0.159465	-0.160557	0.210731	0.214371	0.453975	0.00959747	0.761056	0.272686	0.0334153
ec_123	SMCA4_HUMAN	0.0670509	0.335419	0.233096	0.00984799	-0.0066145	0.775447	1.32367	0.45674	0.604088	0.657872	0.406998	1.38322	0.147188	0.829998	0.590525	0.455644
ec_123	SMCA4_HUMAN	0.301065	0.411774	0.332772	0.0700748	0.131762	0.622281	1.37657	0.389082	0.631616	0.817424	0.387232	1.27985	0.231206	0.741087	0.666857	0.645992
ec_124	CXCR5_HUMAN	-0.0350919	0.258791	0.259678	-0.221721	0.032956	0.362814	0.444722	0.156096	0.0189557	0.00994837	0.20118	0.301404	-0.0192248	0.486017	0.13486	0.0367457
ec_124	CXCR5_HUMAN	0.501904	0.290315	0.113005	-0.0681954	0.078355	0.4454	0.793025	0.30474	-0.000746413	0.0664356	0.220271	0.236919	-0.0102304	0.713467	0.325839	-0.0787947
ec_125	CAV2_HUMAN	-0.231716	0.342419	0.129999	0.22166	0.204717	-0.209704	-0.0298416	-0.757203	0.711211	0.394813	-0.287853	-0.317679	-0.102055	-0.666445	0.13876	-0.0533025
ec_125	CAV2_HUMAN	-0.040779	0.363483	0.133739	0.677618	0.216778	-0.210998	0.201973	-0.624393	0.429986	0.393072	-0.341058	-0.0687345	-0.0908393	-0.591164	0.149181	0.0309127
ec_126	CD44_HUMAN	-0.0820154	0.574706	-0.0565334	-0.43641	0.20246	0.249965	0.352432	0.137318	-0.0401971	0.209166	0.0135981	0.204269	0.0993198	0.416765	0.130128	0.485537
ec_126	CD44_HUMAN	0.219256	0.916229	0.24695	-0.338011	0.216041	0.29256	0.766213	0.133238	0.0051405	0.237662	-0.0466304	0.635953	0.0791489	0.680059	0.11785	0.663977
ec_127	RHG01_HUMAN	-0.142779	0.134704	-0.000140031	1.54896	1.16618	-0.293734	-0.786069	-0.0669891	1.79143	0.209374	-0.344716	-1.06225	0.618648	-1.3164	-0.315459	-0.282883
ec_127	RHG01_HUMAN	-0.0664965	0.150362	0.0719579	1.60914	1.61856	-0.30975	-0.760294	-0.37245	1.78014	0.162944	-0.185613	-1.34315	0.674761	-1.46276	-0.251027	-0.212904
ec_128	CEAM5_HUMAN	0.0874303	0.136722	-0.0731502	-0.581026	-0.130032	0.209575	0.044582	0.0664578	-0.29691	-0.300553	-0.417118	-0.195542	-0.158528	-0.0251412	-1.34355	0.637838
ec_128	CEAM5_HUMAN	-0.334758	0.196861	-0.160127	-0.979725	-0.0868686	-0.0468899	-0.0985382	1.9841	-0.842228	-0.600199	-1.08454	-0.55836	-0.517167	-0.42695	-1.30708	-0.00231197
ec_129	CEAM1_HUMAN	-0.251823	0.12902	-0.365566	0.918326	1.62538	-0.508749	-0.784226	0.362131	-0.212736	0.194573	-0.245124	-1.07283	0.344449	-1.49683	-0.286273	-0.828724
ec_129	CEAM1_HUMAN	-0.213276	0.0730944	-0.316136	0.979165	1.81029	-0.283639	-0.595118	0.136852	0.152448	0.193214	-0.713743	-0.815713	0.534817	-1.50379	-0.21965	-0.742778
ec_130	CEAM6_HUMAN	0.0447478	0.200209	0.365278	-0.079353	0.189748	0.0962921	0.0869032	4.6238	-0.179588	0.11521	-0.44572	-0.456832	0.6427	-0.0934034	-0.7205	0.142886
ec_130	CEAM6_HUMAN	0.102373	0.226981	0.430324	-0.113313	0.172086	0.30079	0.199816	4.15712	-0.194329	0.286315	-0.664133	-0.512278	0.666988	-0.13328	-1.02493	0.294855
ec_131	MK10_HUMAN	0.105759	0.356373	0.203243	-0.256838	-0.141554	0.116524	0.390205	-0.0559606	-0.0393086	0.0692153	0.0860397	0.379481	-0.0639055	0.208298	0.1126	0.277338
ec_131	MK10_HUMAN	-0.00918744	0.279265	0.0251753	-0.240805	-0.15595	0.101081	0.515863	0.146629	-0.00442265	0.281556	0.0498732	0.277653	0.0676472	0.29393	0.126365	0.322626
ec_132	CLD1_HUMAN	0.42336	-0.391529	-0.228819	0.505736	-0.204078	-0.47718	-1.13571	-0.298529	0.0918848	-0.437763	-0.491498	-0.910656	-0.191789	-0.441535	-0.122101	-0.196943
ec_132	CLD1_HUMAN	0.803615	-0.493827	-0.2034	0.465832	-0.489157	-0.520368	-0.837642	-0.27542	0.0849838	-0.410938	-0.757506	-0.893071	-0.493024	-0.95528	0.29738	-0.39176
ec_133	CLD4_HUMAN	0.164179	0.123999	0.00024317	-0.305376	0.188256	0.307805	0.478505	1.02967	0.320099	0.262637	-0.233824	0.513376	0.116752	0.0324284	-0.723282	0.0145605
ec_133	CLD4_HUMAN	-0.0529806	0.0561419	0.0484057	-0.339261	0.129218	0.833965	0.677648	1.77397	0.312963	0.225921	-0.194569	0.00332746	0.127824	0.200971	-0.321851	0.0826474
ec_134	CLUS_HUMAN	0.0188594	-0.20301	0.110164	0.26493	0.421926	0.231775	-0.0484826	1.8855	-0.334528	0.244607	-0.141723	-0.442958	0.199355	0.112042	-0.454735	-0.222699
ec_134	CLUS_HUMAN	0.179411	-0.0833711	0.218282	0.284922	0.463952	0.20747	0.260805	1.75216	0.0763047	0.36102	0.0351518	-0.867655	0.201314	-0.434512	-0.444545	-0.219068
ec_135	MET_HUMAN	-0.167983	-0.261055	-0.207038	-1.54411	-0.176906	0.239282	0.128326	0.53783	-0.0246457	0.94936	-0.269147	0.111349	-0.0176148	0.0806885	-0.465619	-0.173407
ec_135	MET_HUMAN	-0.0512612	-0.304579	-0.141608	-1.23469	-0.090732	0.192106	0.116844	0.862786	-0.0311476	1.13706	-0.398683	0.154115	0.0461257	0.138861	-0.269777	-0.257515
ec_136	CTGF_HUMAN	0.184066	0.229764	0.0355376	0.115412	0.398287	0.0512142	-0.180711	1.02652	0.657665	0.364347	0.0555847	-0.479813	0.296078	-0.212565	-0.288779	-0.106636
ec_136	CTGF_HUMAN	-0.03521	0.111296	0.0373155	0.327211	0.0128423	0.0443439	0.0990899	1.53346	0.98703	0.568938	-0.164863	-0.76363	0.467278	-0.779467	-0.110444	-0.545529
ec_137	CXA1_HUMAN	-0.161874	0.916144	0.541	-0.372759	2.0868	1.00554	-0.324819	6.62874	1.85433	2.91931	-0.161585	0.632941	0.0498484	1.42347	-1.13959	0.970941
ec_137	CXA1_HUMAN	-0.476486	0.559996	0.511352	-0.414569	2.07741	0.945854	1.72004	3.53379	2.56282	2.93326	0.752137	0.666967	1.45236	1.03832	-0.89404	1.07101
ec_138	CXA4_HUMAN	0.293807	0.222341	-0.000621706	-0.339776	3.02317	1.07937	0.54495	4.04729	1.16317	0.148303	0.138981	-0.113451	0.90874	0.191005	-0.429335	0.0430054
ec_138	CXA4_HUMAN	0.782443	0.245822	0.0509688	-0.217331	0.741726	0.201428	0.542058	4.83292	1.43153	0.371571	1.31362	0.175286	1.22435	0.428314	-0.507908	0.0894433
ec_139	CXB1_HUMAN	-0.323498	0.0583737	-0.0880426	1.74265	0.639382	-0.218431	-0.548994	-1.50792	1.50369	0.237597	-0.096561	-0.97295	0.75872	-1.51082	0.379079	-0.550931
ec_139	CXB1_HUMAN	-0.0901312	0.181793	-0.084564	1.85861	0.644848	-0.0912482	-0.834455	-1.69972	1.6305	0.190571	-0.0190427	-0.725682	0.661801	-1.36772	0.292047	-0.489018
ec_140	PGH2_HUMAN	-0.831353	-0.312089	-0.317328	0.813567	-0.773441	-0.156353	-0.787305	0.326355	-1.34524	-0.667216	0.441372	0.873481	0.192746	-0.36734	0.506677	1.30547
ec_140	PGH2_HUMAN	-1.08851	-0.30253	-0.32081	0.78642	-0.524963	-0.199029	-0.459144	0.383802	-1.09628	-0.722021	0.470043	1.03913	0.297373	-0.552659	0.259386	1.28983
ec_141	SODC_HUMAN	0.0451032	0.411499	-0.0333001	0.00573678	-0.0195176	-0.0553104	0.196004	-0.287029	0.100876	0.878924	-0.174816	-0.903154	-0.251779	-0.580609	-0.0518148	-0.708649
ec_141	SODC_HUMAN	-0.0299386	0.344926	-0.00135944	0.025084	0.479961	-0.0283665	0.032476	-0.301861	0.276789	0.933579	-0.197722	-0.629592	-0.0732595	-0.121572	0.0187008	-0.358314
ec_142	EDNRB_HUMAN	0.168338	0.440257	-0.034076	0.397503	-2.92023	-0.0198388	0.0806971	-1.15334	1.70364	-0.0801559	0.531213	-0.133636	1.32815	-1.25774	0.822973	-0.289625
ec_142	EDNRB_HUMAN	0.411823	0.492687	-0.0181765	0.779922	-2.66913	-0.241926	0.0807133	-1.76636	1.98566	-0.0668296	0.434802	-0.254777	1.50072	-1.36067	0.938292	-0.489048
ec_143	ENOA_HUMAN	0.242233	0.273297	0.0902467	-0.0717792	-0.0730379	0.719786	1.16703	2.75628	0.0386853	0.778265	0.566629	1.11083	-0.00291183	0.917303	0.246101	0.194603
ec_143	ENOA_HUMAN	0.32696	0.44066	0.255034	-0.184113	0.0624061	0.837021	0.9294	2.36532	-0.184828	0.841969	0.685715	1.16517	0.125257	1.20623	0.34557	0.350905
ec_144	Q499G7_HUMAN	-0.300614	0.214506	0.557754	-0.448033	0.748566	0.737081	0.586341	3.15981	0.722326	0.500816	-0.0539072	-0.205045	-0.188775	-0.459999	-0.793997	-0.087029
ec_144	Q499G7_HUMAN	-0.270411	-0.0225626	0.388765	-0.541164	0.913186	0.578998	-0.19471	2.52534	0.476689	0.445107	-0.0139123	-0.109451	0.20165	-0.324786	-0.753629	-0.498029
ec_145	MTOR_HUMAN	0.187362	0.0309488	0.117156	-0.534527	-0.386378	0.0699154	0.00228141	-0.125214	-0.265407	0.206417	-0.573105	-0.118406	-0.564817	-0.0150162	-0.200198	0.190863
ec_145	MTOR_HUMAN	0.40018	0.0654075	0.1428	-0.458094	-0.601072	0.156054	-0.216654	0.0928171	-0.384738	0.352618	-0.718508	-0.075186	-0.818572	-0.116327	0.199623	0.200819
ec_146	TACD2_HUMAN	-0.281673	-0.0283596	-0.139065	-0.506131	-0.250847	0.215816	0.119944	0.459262	-0.313837	0.285312	-0.119881	0.716438	-0.419141	0.590565	-0.405149	0.666114
ec_146	TACD2_HUMAN	-0.0648299	0.026855	-0.136764	-0.499348	-0.31656	0.272355	0.280482	0.658684	-0.275298	0.421625	-0.129064	0.509234	-0.471713	0.790805	-0.294336	0.694676
ec_147	LEG4_HUMAN	0.155844	0.244377	0.136385	0.1192	-0.314997	2.95288	-0.505833	1.08219	0.0312203	-0.078232	-0.387844	-0.428185	-0.340721	0.162418	0.177598	0.414068
ec_147	LEG4_HUMAN	0.149325	0.0817993	-0.0981839	0.0384772	-0.647966	2.65222	-0.482183	0.518573	-0.040386	-0.0758365	-0.64143	-0.503383	-0.741068	0.0577405	-0.126656	0.55326
ec_148	KLF4_HUMAN	0.45096	0.207929	0.15057	-0.170508	-0.255411	0.207587	0.775425	0.00372281	0.00532444	0.0180927	0.00086374	0.938959	0.0485814	0.439632	0.0382675	0.437493
ec_148	KLF4_HUMAN	0.368416	0.128439	0.0640685	-0.225554	-0.326002	0.312946	0.715898	0.125558	0.117036	0.367099	0.0526658	0.287719	-0.236424	0.425402	0.41492	0.438323
ec_149	DDIT3_HUMAN	0.186469	-0.032847	0.0282747	-0.19985	-0.242469	0.438404	0.275532	0.0292358	0.150252	0.22211	-0.176769	-0.0629005	-0.300138	0.297479	0.1531	-0.0631185
ec_149	DDIT3_HUMAN	0.327545	-0.00227928	0.0275092	-0.180787	-0.112906	0.410628	0.745642	0.771629	0.455443	0.255702	-0.0735073	0.0634032	-0.208829	0.272512	0.463533	-0.0987666
ec_150	HSF1_HUMAN	-0.0166505	0.0239605	0.409813	-0.151644	0.0300911	0.0441189	-0.00693599	-0.0957416	0.508542	0.518482	-0.512851	-0.410888	0.269437	-0.194216	0.0151783	-0.355667
ec_150	HSF1_HUMAN	0.1597	0.0293685	0.00784927	-0.273047	-0.0229823	0.450625	0.175244	-0.123956	0.477373	0.489001	-0.244713	0.132797	0.0929596	0.436172	0.344531	-0.119338
ec_151	HSP72_HUMAN	-0.00440318	0.0507161	-0.113082	-0.359563	0.140876	0.11233	0.0635991	0.31653	0.44134	0.194261	-0.170764	0.0375098	0.162131	-0.0923546	-0.0795208	-0.109231
ec_151	HSP72_HUMAN	0.573943	0.0185931	-0.140606	-0.373326	0.338194	0.161099	0.204886	0.294405	0.420791	0.337818	-0.122954	-0.203442	0.201785	-0.287927	0.015063	-0.461349
ec_152	HXA13_HUMAN	-0.394419	0.0304644	-0.094228	0.0723603	0.0717286	0.227221	-0.424098	0.271939	-0.318547	0.0125284	-0.23183	0.641536	-0.140678	0.0156708	-0.121179	-0.113303
ec_152	HXA13_HUMAN	-0.299907	-0.177949	-0.105018	0.0481064	0.148429	0.0441662	-0.128646	0.0966158	-0.352638	0.0158748	-0.330824	0.691731	-0.0722863	-0.0733149	-0.304942	-0.284442
ec_153	HXA9_HUMAN	-0.302888	-0.183323	-0.0272699	0.0600112	0.18677	0.0394514	-0.275327	0.235011	-0.523772	-0.0644386	-0.0589806	1.19948	0.0136876	-0.0431767	-0.23357	-0.0489454
ec_153	HXA9_HUMAN	-0.360456	-0.0219399	0.109007	0.0362954	-0.0534708	0.184581	0.0480121	0.271074	-0.399111	0.106273	-0.0113799	1.5063	-0.0865565	0.0440802	-0.257117	0.0175633
ec_154	HXB7_HUMAN	-3.44827	-2.30285	-3.89182	-4.50241	-3.22483	-2.46973	-2.46419	-1.07053	-2.46275	-3.13425	-3.38297	-1.92141	-2.81351	-2.49699	-3.2381	-3.29486
ec_154	HXB7_HUMAN	-1.95906	-4.30265	-4.20758	-4.86306	-2.90329	-3.05367	-2.38043	-1.14843	-1.60403	-3.5991	-3.44114	-2.51947	-3.31156	-2.27444	-3.88025	-3.21228
ec_155	HXC11_HUMAN	-3.17005	-3.09332	-3.67473	-4.35315	-3.53343	-2.80887	-2.55091	-2.34778	-3.04308	-3.64239	-2.86876	-1.96247	-3.1087	-3.02437	-2.84591	-2.5127
ec_155	HXC11_HUMAN	-2.96971	-3.65774	-3.60953	-4.36628	-3.53737	-2.82485	-2.27725	-2.35222	-3.3112	-3.41784	-2.76348	-1.84714	-2.75058	-3.09524	-2.93814	-2.81801
ec_156	SRBP1_HUMAN	-0.161985	0.298327	0.0290325	1.30557	-0.19323	-0.0343944	0.135042	0.748345	0.557424	0.286731	0.0572904	0.31244	0.0373622	-0.375145	0.223424	-0.244551
ec_156	SRBP1_HUMAN	-0.228617	0.240062	-0.0634896	1.27545	-0.143755	-0.0995094	0.179603	0.378909	0.531046	0.303037	0.161128	0.300598	0.0128388	-0.600158	-0.0549108	-0.566911
ec_157	TCEA1_HUMAN	0.0766498	0.543278	0.293454	-0.153483	0.711765	0.0329137	0.5345	2.98323	-0.458731	0.428872	-0.416866	-0.150792	0.146891	-0.896537	-1.30542	-0.857242
ec_157	TCEA1_HUMAN	-2.11644	0.466952	0.508592	-0.125114	0.867483	0.187385	0.476671	3.08984	-0.298748	0.458126	-0.553504	-1.27557	0.0473896	0.344221	-1.38408	-0.370063
ec_158	ICAM1_HUMAN	0.522025	0.634792	0.778986	0.703268	0.723789	0.39278	0.568999	-0.0976436	1.58849	0.778002	-0.605503	-0.490564	0.474765	-0.827675	1.48649	-1.11199
ec_158	ICAM1_HUMAN	0.762497	0.857895	0.745301	1.06751	0.593648	0.846175	0.683557	-0.17196	1.65845	0.717337	-0.821606	-0.71589	0.545836	-0.831192	1.44346	-1.05643
ec_159	ICAM2_HUMAN	0.400816	0.463997	0.0722312	1.18436	1.36345	-0.526022	-0.847427	-0.931031	1.61778	0.347701	-0.312723	-0.956363	0.502265	-0.977762	0.416359	-1.13377
ec_159	ICAM2_HUMAN	0.953839	0.523589	0.0498389	1.35503	1.26979	-0.524454	-0.969032	-1.09372	2.02546	0.447499	-0.279819	-1.49266	0.68526	-1.43614	0.626161	-0.510627
ec_160	IGF2_HUMAN	0.0764176	-0.163368	0.053617	-0.121272	-0.577039	-0.295014	-0.108156	-0.399245	-0.480521	-0.209685	-0.476782	-0.486253	-0.487321	-0.346118	-0.0264225	-0.246688
ec_160	IGF2_HUMAN	0.0526563	-0.192124	0.0175734	-0.16217	-0.252237	-0.333738	-0.293431	-0.218464	-0.436737	-0.259056	-0.519289	-0.518358	-0.517774	-0.283989	0.124442	-0.178685
ec_161	IBP1_HUMAN	0.641197	-0.954903	0.192407	-1.08633	0.283698	-0.256879	0.41039	0.573656	0.300833	-0.427745	1.44776	-0.494487	1.79692	-0.327459	0.110042	-0.52908
ec_161	IBP1_HUMAN	0.581668	-0.918666	0.0318815	-0.477182	0.227267	-0.154497	0.193161	0.469988	1.32309	-0.41205	1.32034	-0.62931	1.59477	-0.0434177	-0.122309	-0.00169473
ec_162	IBP2_HUMAN	0.0146216	1.14977	-0.421507	0.512412	-0.269116	-0.338626	-1.00277	0.233654	-0.0815498	-0.197733	0.497759	-0.238129	0.0264696	0.0343624	0.00333841	-0.0796683
ec_162	IBP2_HUMAN	0.139344	1.08514	-0.460052	0.142904	1.099	-0.266914	-0.995506	0.191352	-0.0302923	-0.11297	0.815901	-0.128695	-0.109119	-0.418263	0.128889	0.0689166
ec_163	IF2B3_HUMAN	0.104929	-0.116139	-0.386788	-0.180439	-0.00111487	-0.0619336	-1.11872	0.324578	-0.0684484	-0.168778	-0.799822	-0.118908	-0.169804	-0.325161	-0.124406	-0.293342
ec_163	IF2B3_HUMAN	0.118414	0.135375	-0.341864	-0.223672	0.0571179	0.00030807	-1.16038	0.360451	0.00555613	0.354624	-0.972992	-0.136967	-0.259148	-0.300106	-0.0196096	-0.515669
ec_164	JAM2_HUMAN	0.0156216	0.28063	0.114592	-0.201087	-0.237471	0.122262	0.176452	1.21478	-0.0888308	0.181637	0.137904	0.254496	-0.147144	0.384947	0.102942	0.234571
ec_164	JAM2_HUMAN	0.168115	0.284254	0.161587	-0.268669	-0.366939	0.258262	0.753406	-0.0132491	-0.0198158	0.228942	0.0875181	0.25496	-0.159209	0.372812	0.288932	0.354502
ec_165	MADCA_HUMAN	0.0714157	-0.0726367	0.347699	-0.253417	-0.226331	0.213538	1.06807	0.202842	0.0124151	-0.677932	0.118771	0.326644	0.00833717	0.403218	0.201591	-0.0179026
ec_165	MADCA_HUMAN	0.140594	0.0360012	0.31515	-0.248992	-0.492789	0.50621	1.38086	0.375007	0.0405083	0.343691	0.24179	0.518859	-0.0272066	0.635782	0.254918	0.142361
ec_166	MMP7_HUMAN	0.217562	0.345352	-0.606981	-0.504076	0.764905	0.985591	0.0750204	1.85832	1.22652	0.300238	1.2124	0.930418	0.711175	-0.00933271	0.0334905	-0.184041
ec_166	MMP7_HUMAN	0.628091	0.695948	-0.613761	-0.388157	2.71199	0.587461	0.978806	1.81928	1.25156	0.293553	1.57921	0.48814	0.744988	-0.264047	0.152066	-0.422588
ec_167	MDR1_HUMAN	0.308094	0.447856	-0.225758	-0.236013	1.74703	0.341862	0.634528	2.04051	1.39165	0.116286	1.08203	0.210889	1.41267	-0.494753	0.0968158	-0.194691
ec_167	MDR1_HUMAN	0.549253	0.564756	-0.275134	-0.100714	1.80533	0.358937	0.733572	0.827383	1.4012	0.182627	1.1949	0.791452	1.60832	-0.396499	0.177795	-0.0517011
ec_168	MTHR_HUMAN	-0.304635	0.0814267	-0.248928	-0.366057	0.258535	0.0742299	0.250623	1.55027	-0.0928836	0.239562	-0.0136628	0.240076	0.0972692	0.190572	-0.144708	0.187385
ec_168	MTHR_HUMAN	-0.268008	-0.107016	-0.273091	-0.408254	0.259457	0.0771179	0.0568147	2.17058	-0.0839311	0.392233	-0.0949156	0.228163	0.0976325	0.260462	-0.277215	-0.0513051
ec_169	MUC1_HUMAN	-2.07667	-0.606014	-0.124728	-2.98349	-0.795307	0.298816	1.24995	4.02023	-0.555793	-1.06236	-0.722675	-0.277581	-0.155314	-0.654847	-2.12356	-0.101587
ec_169	MUC1_HUMAN	-1.9832	-0.505108	-0.65255	-2.75733	-0.131439	0.277003	1.38123	3.36356	-0.301736	-0.862596	-0.228093	-0.211695	-0.252426	-0.683649	-1.08634	-0.118761
ec_170	MUC3A_HUMAN	-0.1949	0.0689106	-0.0660861	1.36309	1.44677	-0.310717	-0.679031	-1.17182	1.95753	0.214405	-0.131016	-1.11138	0.924569	-1.67471	-0.0132467	-0.600442
ec_170	MUC3A_HUMAN	-0.00113576	0.0620844	-0.119305	1.46144	1.46439	-0.239394	-0.652142	-0.987966	1.15657	0.131492	0.0172	-1.36059	0.843963	-1.5174	-0.138103	-0.544268
ec_171	ABCG2_HUMAN	-0.0407497	0.0384704	0.198338	-0.208254	-0.0360438	0.536422	0.896127	0.315873	0.0938602	0.394102	0.148696	0.584882	-0.19426	0.38934	0.566538	0.0143973
ec_171	ABCG2_HUMAN	0.241095	0.0244123	0.198535	-0.256181	0.0103802	0.361971	0.870388	0.408291	-0.0186182	0.341815	0.249874	0.508642	0.0254092	0.347469	0.672633	-0.000286664
ec_172	PCNA_HUMAN	0.188349	0.273283	0.283468	-0.0905108	0.27612	0.398114	0.774696	0.827589	0.0861348	0.124961	0.635817	0.552511	0.112693	0.926197	0.0485941	0.412195
ec_172	PCNA_HUMAN	0.25112	0.304339	0.308255	-0.129876	0.192821	1.11493	0.774831	1.20426	0.297708	0.217721	0.747683	0.55026	0.100502	0.693614	0.0777353	0.393992
ec_173	NDKB_HUMAN	-1.55321	-0.929597	-0.379729	-2.00737	-1.8938	-0.0355682	0.834009	2.80436	-1.30597	-0.677354	-0.348247	1.04881	-0.738216	-0.850175	-1.09645	-0.604231
ec_173	NDKB_HUMAN	-1.41328	-1.09686	-0.382334	-2.07329	-1.94266	0.354976	0.481548	2.98342	-0.963454	-0.847304	-0.380859	0.96543	-0.72886	-0.844371	-0.84981	0.132952
ec_174	OCLN_HUMAN	0.0199878	0.0538899	0.301032	0.66105	-0.476624	0.537945	-0.0212198	1.4945	0.20879	0.91115	0.113328	1.82436	-0.732439	1.94452	-0.429445	0.887826
ec_174	OCLN_HUMAN	0.197841	0.161877	0.429161	0.716816	-0.119028	0.635186	-0.0613661	1.58731	0.155224	0.836818	-0.0444159	2.06768	-0.774761	1.98537	-0.0671095	1.06336
ec_175	OSTP_HUMAN	0.407205	0.441361	0.175155	-0.263094	0.262124	0.412064	0.833759	1.36175	0.0621502	0.214168	-0.152616	0.658072	0.254786	0.208819	-0.0988753	0.219184
ec_175	OSTP_HUMAN	0.566836	0.629216	0.506642	-0.38404	0.331195	0.539371	1.54558	1.46231	0.0432912	0.876922	0.649042	0.855602	0.0995354	0.629561	0.0215054	0.819723
ec_176	CDN1A_HUMAN	-0.0351968	0.216181	0.090637	-0.245303	-0.142686	0.209549	0.490466	-0.0655209	-0.45092	0.0542099	-0.203683	0.151221	-0.296719	0.0324786	-0.0857442	-0.0595519
ec_176	CDN1A_HUMAN	0.38416	0.0744152	0.1698	-0.336817	-0.0870254	0.209273	0.370687	0.0248118	-0.279725	0.106815	-0.0838671	0.240913	-0.460134	0.0178338	0.121046	0.234128
ec_177	PAK1_HUMAN	0.403592	-0.120749	-0.0971325	-0.309546	-0.288433	-0.169547	-0.431677	0.546487	-0.200878	-0.205255	-0.338958	-0.44741	-0.29295	-0.342647	-0.398795	-0.319208
ec_177	PAK1_HUMAN	0.0570329	-0.11011	-0.0250341	-0.268306	-0.247042	-0.145402	-0.310625	0.702198	-0.556287	-0.139635	-0.313334	-0.410783	-0.486002	-0.285796	-0.259116	-0.193849
ec_178	CGRF1_HUMAN	0.165856	-0.0985032	0.267702	-0.224484	-0.148039	0.271784	1.0901	0.242503	-0.0569253	0.106912	-0.00108304	0.347468	-0.105856	0.562435	0.226772	-0.157398
ec_178	CGRF1_HUMAN	0.0283808	-0.0646401	-0.055758	-0.253101	-0.138105	0.260793	0.835046	0.394704	-0.0328434	0.509113	0.0411609	0.212061	-0.133633	0.833149	0.217553	0.354255
ec_179	PLEC_HUMAN	-0.00546483	0.291125	-0.342539	0.178825	1.13373	-0.575809	-1.04179	0.39491	1.19034	0.400794	-0.141897	-1.61769	0.418548	-0.9435	-0.416151	-1.34227
ec_179	PLEC_HUMAN	0.253158	0.348043	0.00571156	0.86255	1.14864	-0.63447	-1.27905	0.244408	1.58065	0.407114	-0.182964	-1.82666	0.530099	-1.20134	-0.346933	-1.09233
ec_180	E2F1_HUMAN	0.0250751	-0.0295436	0.270761	-0.136018	-0.275923	0.173506	0.884446	-0.000324345	0.0875592	0.186983	0.0719635	0.305638	-0.0651341	0.41968	0.0834791	0.184371
ec_180	E2F1_HUMAN	0.0097106	-0.0871784	0.172252	-0.184262	-0.435084	0.23388	0.663053	0.350986	0.0108262	0.332458	0.0206294	0.257924	-0.112116	0.250354	0.431321	0.283192
ec_181	PI2R_HUMAN	0.10979	-0.0214419	-0.00263336	-0.173805	-0.0588246	0.277596	0.626664	0.0777881	-0.00997487	0.057486	0.00366417	0.0886964	0.0667644	0.222547	0.0904071	-0.0788526
ec_181	PI2R_HUMAN	0.20863	0.0213931	0.0658271	-0.158303	-0.159498	1.04276	0.706946	0.335535	0.0517387	0.157499	0.103308	0.212079	-0.023431	0.383928	0.257482	0.0083786
ec_182	RAC1_HUMAN	-1.05808	0.533426	1.30505	-1.29058	1.33054	1.50043	4.02966	5.16739	0.236336	0.68444	0.50575	1.12258	1.18669	-0.401495	-0.23111	0.515416
ec_182	RAC1_HUMAN	-1.05192	0.740755	1.46475	-0.475407	1.14218	0.602058	4.38023	6.00152	0.380394	1.72571	0.88194	1.59639	1.41065	-0.576507	-0.504825	0.587296
ec_183	RB_HUMAN	0.00875574	-0.291037	0.157285	-0.964339	0.703898	0.424276	1.10115	2.95799	0.254132	0.0450154	0.0876975	0.297226	0.651006	-0.0544253	-1.37363	-0.128955
ec_183	RB_HUMAN	0.106231	-0.0786078	0.215721	-0.927956	0.731238	0.352909	0.828615	4.93933	0.574562	0.305568	0.390892	0.155966	0.626417	-0.0804468	-1.72129	-0.220504
ec_184	KDM5A_HUMAN	0.108383	0.403042	0.228787	-0.22765	0.025217	0.318475	1.05934	0.751293	0.281039	0.276363	0.399173	1.15675	0.106641	0.537536	0.332761	0.576377
ec_184	KDM5A_HUMAN	0.171013	0.406922	0.288809	-0.2518	0.132588	0.112603	0.916951	0.788293	0.347064	0.361126	0.209009	1.0338	0.150773	0.283901	0.363215	0.453552
ec_185	PPM1J_HUMAN	0.109814	0.168768	0.202631	-0.225822	0.106666	0.371021	0.72503	0.588409	0.240706	0.367233	0.386496	0.686721	0.0780445	0.681387	0.253892	0.379775
ec_185	PPM1J_HUMAN	0.125414	0.613821	0.334571	-0.21363	0.0881824	0.439227	1.03793	0.617763	0.252314	0.414514	0.574977	0.694676	0.0921696	0.727231	0.356032	0.310627
ec_186	SSR4_HUMAN	0.51565	-0.360473	-0.213411	0.527069	-0.632363	-0.390792	-1.08849	-0.356165	-0.21068	-0.511262	-0.557234	-1.19063	-0.638984	-0.0727312	0.0996912	0.318734
ec_186	SSR4_HUMAN	0.178817	-0.378308	-0.21969	0.442128	-0.658394	-0.337533	-1.01136	-0.342668	-0.347047	-0.621821	-0.420884	-1.17874	-0.78887	-0.0443514	0.133496	0.17161
ec_187	SPRC_HUMAN	-0.177847	0.0465973	-0.0293088	0.75904	-0.375481	-0.0284322	0.545183	1.43265	0.131741	2.46462	0.198764	0.302975	-0.0301898	0.00863155	-0.764675	-0.0408795
ec_187	SPRC_HUMAN	-0.127663	0.283083	0.0300156	0.829328	-0.441813	-0.575493	0.637789	1.11819	0.144757	3.37237	-0.43808	0.300239	-0.0636856	-0.13931	-0.990304	-0.657156
ec_188	MK08_HUMAN	0.350983	0.346334	0.170442	0.338421	2.32552	0.232839	0.238418	-1.82772	1.70839	-0.488106	0.767975	0.0773597	1.80714	-0.982631	1.43651	-0.74233
ec_188	MK08_HUMAN	0.637459	0.313903	0.183881	0.57355	1.1384	-0.116917	0.323618	-2.46781	1.9865	-0.718246	0.803935	-0.596716	1.56206	-1.157	0.593316	-0.337062
ec_189	EDNRA_HUMAN	-0.0169461	-0.105402	-0.27283	1.29296	1.36269	-0.0820806	-0.41379	-2.14915	1.60881	-0.0938302	0.189271	-0.165879	1.11607	-1.65576	0.0659395	-0.0494934
ec_189	EDNRA_HUMAN	0.104114	-0.0735299	-0.301319	1.45038	1.3887	0.0230838	-0.24709	-1.6404	1.72109	-0.378881	0.357268	-0.128468	1.3676	-1.72384	0.673388	0.181022
ec_190	HMGB1_HUMAN	-0.00153087	-0.0409258	-0.45688	1.27699	0.289353	0.00407978	-0.74351	-0.661371	1.4683	0.265923	0.0901844	-0.0274226	0.708839	-1.46328	0.836472	-0.137099
ec_190	HMGB1_HUMAN	0.184667	-0.0292188	-0.460228	1.49438	0.35118	0.015067	-0.678932	-0.965814	1.46803	0.276811	-0.0600798	-0.0827195	0.716489	-1.43141	0.793791	0.312109
ec_191	MDR1_HUMAN	0.130948	-0.0861835	-0.522457	1.16675	-0.458154	0.0308751	-0.431783	-0.707419	1.32802	0.367575	-0.10369	0.135233	0.452107	-1.4282	1.17077	0.222432
ec_191	MDR1_HUMAN	0.333876	-0.0673369	-0.522401	1.54985	-0.458294	0.0743823	-0.385042	-1.0875	1.17347	0.571934	0.0720076	0.095786	0.325511	-1.54324	1.45017	0.59297
ec_192	NPY1R_HUMAN	-0.108676	0.320119	0.0264721	-0.430857	0.26289	-0.00295943	-0.101837	-0.130406	-0.45741	-0.0902802	-0.441258	0.00849078	0.0408045	-0.164968	-0.538941	0.153106
ec_192	NPY1R_HUMAN	0.416271	0.254919	-0.124369	-0.360406	0.688125	-0.18662	1.31664	-0.143811	-0.241839	0.243693	-0.424419	-0.46066	0.158859	-0.618033	-0.240784	0.296445
ec_193	SDC1_HUMAN	-0.318627	-0.0849073	-0.00428519	-0.337423	-0.0106467	0.0312208	-0.0180395	-0.14155	-0.240506	-0.122476	-0.0990157	0.0856695	-0.126101	-0.031406	-0.197874	0.24543
ec_193	SDC1_HUMAN	-0.39889	-0.205327	-0.0181769	-0.356248	-0.0216275	0.0807632	0.12906	-0.112164	-0.300812	-0.0226211	-0.182905	0.039891	-0.121268	0.245122	-0.227468	0.23838
ec_194	TSP2_HUMAN	-0.163751	-0.0683793	0.0189389	-1.21751	0.0865142	0.110185	0.202258	0.661501	-0.0540151	-0.119843	-0.279035	0.392837	0.0550415	0.290967	-1.32298	0.479832
ec_194	TSP2_HUMAN	-0.149867	-0.0839861	-0.0721638	-1.42921	0.00964438	0.207334	0.503841	2.60821	-0.100999	-0.220499	-0.0137866	0.368561	0.0340356	0.566929	-1.31625	0.45496
ec_195	ec_195	0.000936647	-0.0744832	-0.106648	-0.0509155	-0.0896085	0.0270134	-0.114086	0.239607	0.0602181	0.0146191	-0.03585	-0.0598117	-0.167298	-0.0475657	0.107044	0.111706
ec_195	ec_195	-0.233799	-0.185482	-0.100995	-0.143964	-0.341858	-0.00915869	-0.0587072	0.334209	-0.0433614	-0.106026	-0.0952355	-0.0129375	-0.144338	0.246237	0.0952343	0.169668
ec_196	MMP9_HUMAN	-2.05007	-0.560055	-1.38219	-2.84565	-0.586589	-0.735374	-1.16665	-0.0651126	-0.656997	-0.713242	-1.45841	-0.398838	-0.0960293	-0.453996	-2.18605	-1.03283
ec_196	MMP9_HUMAN	-2.35427	-0.795155	-1.52421	-3.72595	-0.822297	-0.947151	-1.66196	0.191213	-0.923888	-0.833298	-1.61556	-0.707741	-0.0320935	-0.773321	-2.687	-0.58379
ec_197	MMP12_HUMAN	-0.0699556	0.0318604	0.0120813	-0.238766	-0.0897378	0.1075	0.0825269	0.0621298	-0.0569402	-0.0461332	0.0963692	0.0367075	0.00383777	0.188918	-0.0930301	-0.000326811
ec_197	MMP12_HUMAN	-0.107194	-0.177284	0.0247329	-0.261302	-0.0387055	0.0881551	0.190707	-0.00532751	-0.032547	0.0156849	0.124124	0.060506	-0.0583022	0.27378	0.0440457	-0.0780918
ec_198	TSN12_HUMAN	0.0257304	0.0178792	-0.0751528	-0.383259	0.132498	0.154861	-0.00542985	-0.0421093	0.496803	0.0633098	-0.144217	0.110272	0.287483	-0.0223628	-0.0236657	-0.0842296
ec_198	TSN12_HUMAN	0.019817	0.115114	-0.114284	-0.3832	0.119186	0.145101	0.428357	0.00555982	0.851723	0.634936	-0.170306	0.127667	0.408016	-0.0314132	0.0669656	-0.123132
ec_200	MMP10_HUMAN	0.0459762	0.172228	0.3416	0.0319006	0.232768	0.379311	0.503983	0.840814	0.126989	0.240009	0.238596	0.74687	0.198409	0.241791	0.017789	0.11244
ec_200	MMP10_HUMAN	0.372677	0.062093	0.400396	0.0167608	0.231825	0.385163	0.85408	2.47778	0.455875	0.340454	0.356554	0.828544	0.188582	0.266575	0.116919	0.138656
ec_201	MMP13_HUMAN	-0.267398	0.0326547	-0.0413455	1.91578	1.06024	-0.0199339	-0.33353	0.0024372	1.18451	0.0791305	0.138598	-0.288546	0.589814	-1.21084	-0.08923	-0.0422736
ec_201	MMP13_HUMAN	-0.0518818	0.0483225	-0.0396794	1.99611	1.02385	-0.00695578	-0.394226	-0.441898	1.31599	0.0797214	0.154492	-0.19306	0.77145	-1.60413	0.110467	0.326107
ec_202	MMP14_HUMAN	-0.0874226	0.000517076	-0.0789455	0.272618	0.129347	-0.411712	-0.373024	0.15983	0.728115	0.249844	-0.0186205	-1.00275	0.140299	-0.593933	-0.0121554	-0.420533
ec_202	MMP14_HUMAN	-0.175999	0.0260343	-0.0539579	0.193651	0.0921394	-0.335918	-0.565168	-0.180107	1.00797	0.197301	-0.0262329	-0.966683	0.199704	-0.638702	0.213775	-0.488187
ec_203	IF2A_HUMAN	-0.210012	0.172082	0.0909053	1.02271	0.376398	-0.101334	-0.260491	-1.14005	1.23858	0.376583	-0.0759887	0.0313767	0.49183	-0.675771	0.358456	0.0672466
ec_203	IF2A_HUMAN	-0.0456222	0.209371	0.0965417	1.12651	0.667803	-0.0898379	-0.266315	-1.45253	1.19566	0.394837	-0.0429267	0.00664755	0.446066	-0.556401	0.398862	-0.0202194
ec_204	PLK2_HUMAN	0.0312455	-0.216932	-0.0133837	-0.132759	-0.836968	0.309365	-0.86008	0.330273	-0.0677033	0.603839	-0.959253	0.171775	-0.308974	0.306607	0.131931	-0.00642953
ec_204	PLK2_HUMAN	0.0927508	-0.0888324	-0.250189	-0.164687	-1.24494	0.178009	-0.843751	0.29143	-0.103066	1.1426	-1.53762	0.215903	-0.293337	0.116817	0.199236	0.00775699
ec_205	EZRI_HUMAN	-0.186468	0.175308	-0.243271	-0.342074	0.0970083	0.115947	0.230507	-0.047402	0.0685058	-0.0394075	0.299792	0.285604	0.218229	0.214925	-0.147022	0.0207693
ec_205	EZRI_HUMAN	0.268019	-0.0126022	-0.322466	-0.297695	0.142472	0.237274	1.1474	0.067725	0.114555	-0.0564865	0.433622	0.294298	0.364964	0.380462	-0.0493894	-0.045869
ec_206	HNRPR_HUMAN	-0.464092	-0.0810624	-0.0600991	-0.394653	-0.000283438	0.0679182	0.0866454	0.141145	-0.384419	0.0324156	-0.204572	0.174329	-0.291706	-0.0200591	-0.256099	-0.100374
ec_206	HNRPR_HUMAN	-0.286648	-0.182616	0.216725	-0.355695	-0.0144707	-0.0477142	0.10361	0.143141	-0.268922	0.0107415	-0.0287892	0.361083	-0.316333	0.290777	-0.154295	-0.0870479
ec_207	RL9_HUMAN	0.149949	0.344137	-0.323695	0.210418	2.00464	-0.0804462	0.629441	0.106278	1.50991	-0.122309	0.970531	0.129197	1.39995	-0.544939	0.178992	-0.518938
ec_207	RL9_HUMAN	0.0947291	0.412227	-0.361155	0.282999	1.85205	0.0448171	0.688508	-0.408205	1.56746	-0.158569	0.937103	0.17071	1.43716	-0.729608	0.179992	-0.628272
ec_208	BAX_HUMAN	-0.056961	0.0862888	0.241078	0.931894	0.435841	-0.0255862	-0.00890325	0.207658	1.16024	0.314507	-0.2144	0.0787743	0.574855	-0.711602	-0.110263	0.123392
ec_208	BAX_HUMAN	0.0587069	0.142748	0.0941534	0.94774	0.386394	0.00561692	0.0277449	-0.177413	1.42811	0.274323	-0.179217	-0.102516	0.697996	-0.933945	0.283003	0.220297
ec_209	IMA2_HUMAN	-0.23847	0.125012	0.121594	1.23888	0.477518	-0.102832	-0.216338	-0.405041	1.21832	0.340646	-0.163011	-0.212064	0.329757	-0.88936	0.131759	-0.213995
ec_209	IMA2_HUMAN	-0.154929	0.131834	0.0600778	0.996008	0.595183	-0.251483	-0.0928375	-1.10804	1.13224	0.266484	-0.117682	-0.236626	0.459452	-1.02545	-0.0568926	-0.353364
ec_210	FGF7_HUMAN	-0.505104	-1.73804	-1.68028	-0.146961	-4.40095	-0.212192	0.283898	-0.310505	-2.35925	-2.22307	-1.54264	1.30964	-2.41376	-1.4332	0.56112	-0.278113
ec_210	FGF7_HUMAN	-0.550773	-1.82107	-1.68998	-0.39395	-4.15944	-0.129664	0.346169	-0.445791	-2.53872	-2.36604	-1.62814	1.26272	-2.41461	-1.29909	0.793997	-0.133519
ec_211	CYC_HUMAN	0.0240387	0.14871	-0.0847231	-0.0827898	-0.0100603	0.289338	-0.276103	0.431675	-0.106144	-0.033823	-0.0969746	-0.0583701	-0.128022	0.0486333	-0.052049	0.427396
ec_211	CYC_HUMAN	-0.00981954	0.0407804	-0.12982	-0.165813	-0.199392	0.307097	0.169924	0.568561	0.0724212	0.0307105	-0.0237333	0.06732	-0.0596039	0.360113	-0.0775355	0.534515
ec_212	IFIT2_HUMAN	-0.776814	-1.18353	-1.70841	-3.19474	-0.270037	-1.71926	0.00515388	-0.158911	-0.747625	-1.64117	-1.65928	-0.301554	-0.742794	-1.36425	-2.04576	-1.01046
ec_212	IFIT2_HUMAN	-0.803077	-1.48755	-1.97444	-3.46729	-0.532026	-1.29019	0.00235567	-0.374493	-0.974867	-1.77877	-1.45111	0.0779702	-0.815014	-1.00096	-1.71897	-0.758879
ec_213	TGFB1_HUMAN	-3.19066	-2.89931	-2.77643	-1.86382	-3.63059	-1.64447	-2.98354	-2.46375	-1.79962	-2.44277	-2.21863	-1.2716	-2.57638	-3.55036	-0.814562	-1.79854
ec_213	TGFB1_HUMAN	-3.11545	-2.8138	-2.78364	-1.93848	-3.82076	-2.07552	-2.95	-2.75062	-1.64244	-2.32759	-2.34295	-1.24405	-2.50241	-3.52924	-0.752496	-1.52737
ec_214	SLK_HUMAN	0.124185	-0.0780313	0.249432	-1.82408	-0.0446499	0.328072	0.376254	0.1067	-0.0673414	0.197072	0.109802	0.428018	0.0931846	0.331202	-0.0417626	-0.0325272
ec_214	SLK_HUMAN	0.107121	-0.0239751	0.251184	-0.231289	0.0984773	0.449917	1.11387	0.287357	-0.0409117	0.323845	0.292873	0.626318	0.0287634	0.568913	0.15346	-0.0181288
ec_215	G3P_HUMAN	1.20309	0.127518	0.401862	3.47757	-2.38126	1.54298	0.0256588	-0.767241	-0.596268	0.69756	0.0734428	3.01764	-1.20869	0.53715	4.30109	1.41869
ec_215	G3P_HUMAN	0.993753	0.158915	0.417607	3.49734	-2.40311	1.52614	-0.058016	-1.10044	-0.781183	0.663104	0.0710478	3.12574	-1.19455	0.280195	4.25483	1.5416
ec_216	RARB_HUMAN	-0.245317	-0.120848	-0.14592	-0.175201	-0.00527197	0.0127629	1.00984	1.17872	0.786083	0.108332	-0.0796411	-0.274796	0.246448	-0.993593	-0.417837	-0.192232
ec_216	RARB_HUMAN	-0.0926479	-0.106549	-0.152344	-0.0780583	-0.203181	0.0480723	0.912932	0.542602	0.742924	0.0500675	-0.0291934	-0.10806	0.307407	-1.06336	-0.406649	-0.0463547
ec_217	NUP88_HUMAN	-0.172342	0.0478164	0.129467	-0.354985	-0.0765502	0.266645	0.872377	0.391715	0.169324	0.292778	0.354945	0.705206	0.034086	0.645831	0.0426771	0.0315902
ec_217	NUP88_HUMAN	-0.133185	-0.00871197	0.144073	-0.399627	0.0663227	0.362026	0.683941	0.578587	0.207598	0.41909	0.377556	0.809364	0.0453551	0.647242	0.132292	-0.120433
ec_218	IL1A_HUMAN	-0.282772	-0.0444543	-0.00362116	-0.297371	0.314245	0.0362306	0.22455	0.473372	0.107678	0.368194	0.106099	0.420085	0.186992	0.177442	-0.249217	0.0284901
ec_218	IL1A_HUMAN	-0.305161	0.0564891	0.037867	-0.327123	0.262754	0.114813	0.432476	0.153572	0.150455	0.307166	0.160677	0.408702	0.197421	0.296452	-0.119915	-0.0385547
ec_219	BEX3_HUMAN	0.291469	0.110655	0.198056	-0.2287	0.0846619	0.2034	0.801034	0.47881	0.45326	0.526812	0.384927	0.745892	0.153767	0.568621	0.304278	0.242079
ec_219	BEX3_HUMAN	0.331476	0.210558	0.263685	-0.216269	0.245833	0.462324	1.14692	0.412291	0.341019	0.497838	0.514399	0.568199	0.113954	0.771403	0.34648	0.14466
ec_220	DX39B_HUMAN	-0.0271577	-0.303441	0.211516	0.810936	-1.32816	0.547291	0.00543903	1.03201	-0.525272	0.219596	-0.378468	1.98957	-0.307663	0.968544	1.00726	1.0059
ec_220	DX39B_HUMAN	0.0944496	0.0129909	0.250362	0.870311	-1.37536	0.563682	0.0517009	0.86585	-0.54093	0.0319247	-0.416293	2.11831	-0.359269	0.986992	1.12481	1.062
ec_221	PVRL1_HUMAN	-0.590114	-0.519841	-0.64852	-0.331994	-0.582916	-0.6475	-0.64773	-0.727514	0.996956	-0.359699	-0.355392	-0.625151	0.364258	-1.54973	-0.807507	-0.65499
ec_221	PVRL1_HUMAN	-0.413576	-0.516462	-0.703036	-0.0900608	-0.570396	-0.731467	-0.722539	-1.15306	1.09179	-0.401137	-0.267925	-0.707023	0.473721	-1.78408	-0.952176	-0.484991
ec_222	Q16590_HUMAN	-0.174088	-0.0512419	0.010385	-0.276642	0.0304358	0.00638479	-0.379487	-0.118885	-0.688907	-0.20388	-0.674547	-0.334798	-0.266212	-0.22758	-0.692467	-0.177369
ec_222	Q16590_HUMAN	-0.549188	-0.197844	0.220541	-0.478895	-0.106531	0.0965748	0.0538037	2.60646	-0.60165	-0.245467	-0.781996	-0.355879	-0.380661	-0.255034	-0.755581	-0.130239
ec_223	IMB1_HUMAN	-0.146775	-0.983567	-0.672836	-1.38549	0.320688	-0.504487	-0.0297656	-1.00775	0.404477	-1.35158	0.494773	0.179078	0.991262	-1.43197	0.403094	-0.329593
ec_223	IMB1_HUMAN	0.151545	-0.964544	-0.689651	-1.37754	0.256521	-0.491534	0.0379262	-1.51553	0.165366	-1.28325	0.114329	-0.14772	0.736078	-1.50289	1.00169	-0.620258
ec_224	CD27_HUMAN	0.292479	-0.0979596	0.0948298	-0.0566274	-0.0703228	0.0619305	0.140544	-0.14648	0.00775156	-0.128808	-0.0631678	-0.239843	0.0312609	0.0280987	0.0180699	-0.114315
ec_224	CD27_HUMAN	0.832734	-0.177739	0.120278	-0.0553137	-0.228462	0.0422487	0.374847	-0.122263	-0.17752	-0.0983298	0.00458548	-0.189364	-0.0213542	0.0174708	0.278288	-0.0181352
ec_225	A2MYD1_HUMAN	0.349733	0.0720126	0.129578	-0.0144199	0.303078	-0.313813	0.483088	0.383109	1.54738	0.569606	-0.311096	-1.29812	0.01064	-0.931866	-0.306486	-0.323668
ec_225	A2MYD1_HUMAN	1.01492	-0.116248	-0.0766898	0.0721762	-0.174553	-0.528812	0.397849	0.415983	1.19147	0.407421	-0.263318	-1.29115	0.2965	-0.971188	-0.378612	-1.02735
ec_226	EF1A1_HUMAN	0.422533	-0.359809	-0.0603406	-0.722751	0.928546	0.0322175	1.84068	4.58719	0.899585	1.12009	-0.382892	0.0192719	0.654864	-0.802139	-2.10402	0.184923
ec_226	EF1A1_HUMAN	0.251023	-0.433336	-0.0929384	-0.929688	0.93807	0.1571	1.81057	4.52777	1.27474	0.576643	-0.981314	0.0285716	0.826994	-0.489874	-2.26057	0.149394
ec_227	NBR1_HUMAN	0.181217	0.153204	-0.0131884	-0.179061	-0.0635976	0.217951	0.254891	0.237285	-0.08877	0.102067	-0.146828	0.095906	-0.0948069	0.0388374	0.224342	0.249423
ec_227	NBR1_HUMAN	0.196457	0.150124	-0.0311445	-0.207041	-0.14235	0.41423	0.341471	0.214336	0.0100894	0.183629	-0.0695535	0.0999003	-0.113434	0.131124	0.35939	0.349949
ec_228	K1C19_HUMAN	0.128994	0.0990516	-0.021621	0.0473779	0.210713	0.110867	-0.161209	1.57037	0.933619	0.122731	-0.791006	-0.716576	-0.0433845	-0.213501	-0.729768	0.339675
ec_228	K1C19_HUMAN	0.169716	0.185044	-0.0983486	-0.0586694	0.0646966	0.0970624	-0.140133	1.23283	0.713363	0.382789	-1.03854	-1.1156	0.043504	-0.236083	-1.03315	0.340001
ec_229	K2C6B_HUMAN	-0.000263137	0.349712	0.272937	0.560094	0.237309	0.0613292	0.470528	-0.0996514	0.899214	0.50342	0.0107395	0.273201	0.189681	-0.196468	0.108375	-0.210644
ec_229	K2C6B_HUMAN	0.0658918	0.342426	0.290064	0.608594	0.281859	0.0177575	0.434725	-0.539406	1.05818	0.528809	-0.107707	0.0527288	0.271862	-0.160902	0.174597	-0.345237
ec_230	HNRPC_HUMAN	-0.142248	0.218261	0.157484	0.0997431	0.58497	-0.186785	0.512884	-0.164763	1.26618	0.532943	0.0192518	-0.0351594	0.540097	-0.258802	0.0924336	-0.498856
ec_230	HNRPC_HUMAN	-0.0707221	0.282387	0.193225	0.531866	0.449657	-0.0396172	0.739453	-0.363503	1.11371	0.456424	0.0423753	0.357269	0.34379	-0.496972	0.247934	-0.494404
ec_231	UBC_HUMAN	0.0925858	-0.129754	0.00857995	0.110755	-0.0703934	0.05529	-0.311515	0.461131	-0.0895453	0.0760338	-0.146593	-0.125344	0.0210631	-0.0956619	-0.237075	0.0147403
ec_231	UBC_HUMAN	0.197425	-0.172252	-0.0955653	0.11903	-0.150423	-0.0295671	0.0924527	0.575676	0.0813719	0.0781538	-0.170745	-0.0120808	-0.14379	-0.00573381	0.0357283	0.0150753
ec_232	WSB1_HUMAN	0.164051	0.026683	0.634853	0.368966	0.4591	0.791971	0.682728	6.78792	1.30157	1.58044	0.934113	0.100954	0.233758	0.229697	0.133306	0.121053
ec_232	WSB1_HUMAN	0.324998	0.0602923	0.566459	0.36138	0.355241	0.798383	0.884411	7.39625	0.98774	1.50398	0.449298	0.192521	0.254109	0.208063	0.306735	0.268379
ec_233	IL6RA_HUMAN	-0.19731	0.175489	0.134659	-0.0749776	0.527898	0.43437	-0.15367	5.87401	-0.26084	0.100677	0.193015	0.0571444	0.0932935	0.283776	-0.0315581	-0.0814216
ec_233	IL6RA_HUMAN	-0.0235933	-0.139023	0.794761	-0.0169173	0.45764	0.388156	0.730016	1.40977	-0.100235	0.419551	0.0522607	-0.0158131	0.191382	0.214491	0.278989	-0.166001
ec_234	CADH1_HUMAN	-0.604148	0.094752	-0.0973486	1.83078	1.91864	-0.342011	-1.1331	-1.80522	2.20289	0.171557	-0.0891153	-1.08844	1.06132	-1.97915	0.207385	-0.664941
ec_234	CADH1_HUMAN	-0.475785	0.0831288	-0.127579	1.38567	1.84996	-0.247563	-1.11071	-2.15958	2.48488	0.155259	0.0107614	-0.766172	1.08257	-2.10099	0.410267	-0.386697
ec_235	SF3B3_HUMAN	-0.257751	-0.0402071	-0.235101	1.81324	1.46379	-0.330311	-0.969208	-1.59552	2.26795	-0.0809031	-0.0692969	-1.24796	1.02112	-2.20942	0.0185637	-0.584584
ec_235	SF3B3_HUMAN	-0.12108	-0.0620995	-0.266154	1.91552	1.33513	-0.241469	-0.98307	-1.78545	1.80832	-0.161749	0.117724	-1.48352	0.970195	-2.0472	-0.06806	-0.40827
ec_236	MLH3_HUMAN	0.151333	0.0817832	-0.61204	-0.0110593	2.72977	0.0700397	-0.633943	-0.527156	1.58363	-0.274662	1.2761	0.129776	2.64437	-0.377018	1.02071	-0.151375
ec_236	MLH3_HUMAN	0.0695178	0.0925663	-0.514169	0.0253491	2.79074	-0.122367	-0.935576	-0.407844	1.29803	-0.367854	1.73976	0.0421304	2.4416	-0.437832	0.703263	-0.184807
ec_237	PAK7_HUMAN	0.146428	0.457593	-0.479179	-0.489826	3.06172	0.465815	0.184126	0.103081	1.06184	-0.104727	0.897741	0.00534868	2.1621	-0.524802	0.16585	-0.12767
ec_237	PAK7_HUMAN	0.0553869	0.444462	-0.417899	-0.685742	3.49939	0.40227	0.435356	0.270639	0.971558	-0.334168	1.58571	-0.0723849	2.7605	-0.668103	0.870219	-0.193847
ec_238	EF1G_HUMAN	0.0272829	0.156862	-0.0526932	-0.04959	-0.0738882	-0.0313998	-0.468755	1.7787	0.114696	-0.0234083	-1.14277	-1.07025	0.282696	-0.915712	-0.39634	-0.969945
ec_238	EF1G_HUMAN	-0.0851686	0.0233645	0.0340094	0.023898	-0.0903729	-0.0271543	-0.277945	1.82608	0.134529	-0.0359165	-1.29478	-1.29702	0.261943	-0.886563	-0.45505	-1.10268
ec_239	SGSM3_HUMAN	0.984959	0.250481	0.0155295	-0.241944	-0.202232	0.0162451	0.270273	0.58135	0.0233207	0.160046	0.181771	0.116498	0.0274871	0.157206	0.317456	-0.31362
ec_239	SGSM3_HUMAN	0.511748	0.191639	0.191379	-0.23667	-0.201063	0.104038	0.748999	0.507608	0.0414187	0.154509	0.261097	0.165065	0.106781	0.244042	0.284164	-0.320879
ec_240	EGF_HUMAN	0.228119	0.0487779	0.283838	0.202305	0.185941	0.0990848	0.0581961	0.692236	0.195125	-0.142236	-0.0182708	-0.00246795	-0.132458	-0.652482	-0.00580038	0.0612775
ec_240	EGF_HUMAN	0.272688	0.023168	0.288793	0.433716	-0.0624038	0.0963421	0.273876	0.527015	0.0473035	0.0224567	0.0361751	0.0786132	-0.218915	-0.514369	0.31108	0.269719
ec_241	B2LA1_HUMAN	0.678362	-0.0296774	-0.252172	0.23806	0.137239	-0.368099	-0.151785	1.19784	-0.00559003	-0.457231	-0.203168	-0.447052	-0.48928	-0.591697	0.0752784	-0.146226
ec_241	B2LA1_HUMAN	0.907285	-0.270857	0.0353775	0.229521	0.0852656	-0.414062	0.105439	1.36103	-0.295421	-0.263116	-0.297206	-0.484083	-0.635622	-0.68073	0.42989	-0.351708
ec_242	SOX9_HUMAN	-0.190463	-0.0697838	-0.192575	1.86416	1.30446	-0.233904	-0.977936	-1.76645	1.76277	0.107115	-0.00313018	-1.05695	0.926538	-2.03245	0.170069	-0.601097
ec_242	SOX9_HUMAN	-0.0306635	-0.107304	-0.159551	2.01882	1.21822	-0.102732	-1.001	-1.71489	1.91643	0.0409254	-0.0907658	-0.93374	0.99251	-1.74242	0.252388	-0.383242
ec_243	LYSC_HUMAN	0.289617	-0.398526	-0.095981	0.488682	-0.383709	-0.185882	-0.828548	-0.27955	-0.11168	-0.465458	-0.237896	-0.453023	-0.352916	0.0780992	0.381722	0.105995
ec_243	LYSC_HUMAN	0.277414	-0.438125	-0.096282	0.447237	-0.403315	-0.163666	-0.667337	-0.23027	-0.255259	-0.570703	-0.194774	-0.470437	-0.486033	0.210344	0.2316	-0.0266354
ec_244	LIFR_HUMAN	0.345266	0.135572	-0.371916	-0.071218	-0.206766	-0.841216	-1.11448	-0.397258	0.165486	0.450562	-0.173726	-0.235323	-0.238337	-1.07703	1.06425	-0.25301
ec_244	LIFR_HUMAN	0.335331	0.0438299	-0.582192	-0.11548	-0.476195	-0.826183	-1.14242	-0.242161	0.165265	0.674295	-0.27466	-0.252108	-0.348623	-1.0154	1.02476	-0.287149
ec_245	TNFA_HUMAN	0.0484112	0.654636	0.101967	0.138951	-0.555985	0.154922	0.542323	0.541552	0.347659	0.472052	0.299479	0.971222	0.192559	-0.267827	-0.0827929	1.65148
ec_245	TNFA_HUMAN	-0.0338187	0.686685	0.109438	0.0758473	-0.501555	0.115957	0.466541	0.469714	0.510617	0.557445	0.124344	0.981098	0.149871	-0.258094	0.00698389	1.54017
ec_246	K2C8_HUMAN	0.497208	0.0538182	0.17816	-0.117171	0.0837859	1.04716	0.772044	0.598253	0.034715	0.310378	0.482088	0.100889	-0.125398	0.506043	0.693803	-0.146443
ec_246	K2C8_HUMAN	1.04335	0.295492	0.284104	-0.099662	0.0611161	1.13278	1.13065	1.44079	0.100214	0.0747362	0.486926	0.212	0.0768237	0.688883	0.559516	-0.118114
ec_247	RPAB1_HUMAN	0.278195	-0.105543	0.130328	-0.255703	-0.040314	0.272547	0.0761205	3.48149	0.0184822	0.354951	-0.384692	-0.171952	0.00593019	0.0959829	-0.343109	-0.0618425
ec_247	RPAB1_HUMAN	0.36636	-0.145616	0.0919191	-0.223092	-0.0833237	0.0493616	-0.0507076	3.68451	0.0908413	0.342079	-0.422457	-0.179398	-0.102188	-0.028923	0.237933	-0.290895
ec_248	GATA4_HUMAN	-0.287124	-0.580781	-0.273412	-2.1041	-0.0457924	1.17924	-0.0803551	0.518126	-0.174054	-0.264268	-0.2897	-0.235347	-0.267081	0.0990598	-1.70663	-0.255179
ec_248	GATA4_HUMAN	-0.0397969	-0.443309	-0.475556	-2.45693	-0.0876329	1.50722	-0.0528723	4.01616	-0.189733	-0.704488	-0.0877208	-0.25517	-0.124563	-0.0203156	-0.0949424	-0.538848
ec_249	ADAM9_HUMAN	0.672173	0.39366	0.461002	1.48219	1.21294	0.38041	1.35713	0.855413	1.82155	0.605913	0.471745	0.502524	1.10693	-0.716187	0.615542	0.366313
ec_249	ADAM9_HUMAN	0.911464	0.434524	0.58254	1.67536	1.48146	0.619814	1.26742	0.464201	2.12132	0.567132	0.362724	0.5244	1.04425	-1.19132	1.00147	0.439154
ec_250	HSBP1_HUMAN	-0.559778	0.109259	-0.209364	1.82716	0.623296	-0.0433288	0.0270063	-0.52566	1.54773	-0.0447104	0.165058	-0.156393	0.763236	-1.52064	-0.169648	0.193055
ec_250	HSBP1_HUMAN	-0.411394	0.121813	-0.23032	1.99387	0.572904	-0.024656	0.0633611	-0.801488	1.77803	0.0192901	0.369592	0.0392971	0.772908	-1.46991	0.482454	0.278064
ec_251	CLD16_HUMAN	0.157937	0.14212	0.130186	-0.188804	0.0985776	0.537125	0.482949	0.474916	0.0920303	0.31223	0.217367	0.293812	0.03818	0.753871	0.485446	0.340877
ec_251	CLD16_HUMAN	-0.0370578	0.0735255	0.186537	-0.183175	0.195056	0.51022	0.884215	0.167152	-0.00211677	0.408976	0.31537	0.580002	-0.040753	0.577453	0.737515	0.124785
ec_252	RS3_HUMAN	0.00617953	-0.110661	0.220883	-0.210135	0.202919	0.271508	0.80066	0.516732	0.107084	0.301792	0.165924	0.468357	0.0478141	0.42312	0.158654	0.0237223
ec_252	RS3_HUMAN	0.394614	-0.00613071	0.290229	-0.237042	0.211876	0.0597458	0.854123	0.785628	0.0557301	0.226424	0.439515	0.515361	0.0354709	0.349002	0.659582	0.0583603
ec_253	EP300_HUMAN	-1.82994	-1.15007	-0.888657	-2.554	-0.983711	-0.376028	1.08702	1.59174	-1.4072	-1.5369	-0.969692	0.36184	-0.395213	-0.96688	-0.734578	-0.68272
ec_253	EP300_HUMAN	-1.72332	-1.36184	-0.903767	-2.62948	-0.726756	-0.626645	0.144583	1.93275	-1.75877	-1.5536	-1.15654	0.226079	-0.548809	-1.37579	-1.13093	-1.22494
ec_254	AL9A1_HUMAN	-0.416476	0.186097	0.284729	-0.637131	-0.125243	0.325402	0.579194	2.68168	-0.651139	0.0532491	0.104093	0.299049	0.0337053	0.332597	-0.383296	-0.163184
ec_254	AL9A1_HUMAN	0.23943	0.290585	0.474316	-0.545527	-0.137927	0.324595	0.787457	2.73799	-0.862599	0.0658789	0.108956	0.464618	-0.214635	0.452566	-0.302697	0.199545
ec_255	IL1R2_HUMAN	0.310083	0.0462248	0.0194828	-0.747061	0.0937661	1.17331	0.190569	4.32043	0.133498	0.0120926	-0.162815	-0.104834	0.133013	0.218539	-1.43742	0.0421982
ec_255	IL1R2_HUMAN	0.489878	0.0705325	0.228301	-1.26468	-0.00725144	1.49333	0.780672	4.19441	0.375738	0.0463275	-0.157092	-0.051774	0.00742308	0.136777	-2.02912	0.268671
ec_256	FOS_HUMAN	0.241788	-0.0274293	-0.16684	0.585828	-0.105385	0.301798	0.441692	0.539195	0.305495	0.497465	0.191807	0.267409	-0.315646	1.22956	0.318618	-0.270113
ec_256	FOS_HUMAN	0.334325	0.0339374	0.0460806	0.593283	-0.216441	0.348964	0.759104	0.526173	0.395246	0.62219	0.118466	0.312307	-0.48808	1.44157	0.58506	0.0562675
ec_257	SF3B4_HUMAN	0.303502	0.42551	0.184323	-0.321005	-0.0421802	0.239224	0.575512	-0.0973723	-0.226489	0.166964	-0.124952	0.00327311	-0.1821	0.28879	-0.187758	0.00196171
ec_257	SF3B4_HUMAN	-0.0187818	0.227376	0.222956	-0.268635	-0.150288	0.218456	0.699733	0.122486	-0.240215	0.493096	-0.104001	0.0520993	-0.293302	0.33639	-0.0334577	0.080242
ec_258	E2AK4_HUMAN	-0.350279	0.056955	-0.0239555	1.5737	1.1751	-0.246021	-0.738771	-1.55476	1.61195	0.217579	-0.0300719	-0.840024	0.899061	-1.56221	0.139711	-0.239946
ec_258	E2AK4_HUMAN	-0.133343	0.0173537	-0.00219358	1.70434	1.203	-0.0759413	-0.826788	-1.73949	1.60846	0.172969	-0.0380667	-0.5965	0.894656	-1.33501	0.343272	-0.0901563
ec_259	MYCN_HUMAN	-0.241379	0.192067	0.0171002	1.64945	1.37621	-0.247877	-0.650012	-0.857575	1.67666	0.288102	-0.138079	-1.13886	0.774778	-1.53347	-0.171056	-0.573096
ec_259	MYCN_HUMAN	-0.0785312	0.110954	0.0399224	1.63829	1.38144	-0.22004	-0.500246	-1.03413	2.02002	0.379764	-0.16839	-1.09873	0.86903	-1.75629	0.059738	-0.366146
ec_260	CLD10_HUMAN	-0.66269	0.293556	0.192084	-0.31271	-0.347021	0.393014	0.401851	0.0229194	0.0574125	0.0866945	0.0122435	0.203022	-0.138005	1.2683	-0.128597	0.419321
ec_260	CLD10_HUMAN	-0.508017	0.0714194	0.12781	-0.319764	-0.499342	0.281592	0.274742	-0.0164094	0.0354353	0.195861	-0.0176485	0.110761	-0.126999	0.719768	-0.20019	0.356319
ec_261	MA2C1_HUMAN	0.025323	0.32696	0.230748	-0.217222	-0.128761	0.261846	0.427077	0.0515723	-0.0876537	0.15434	0.167612	0.314496	-0.0117541	0.345998	0.132123	0.396749
ec_261	MA2C1_HUMAN	0.173708	0.165521	0.165723	-0.301421	-0.146799	0.23394	0.98587	0.0749721	0.0333376	0.297055	0.186908	0.369695	-0.0717622	0.453812	0.285411	0.379104
ec_262	F13B_HUMAN	0.211056	-0.0450965	-0.02706	-0.346368	-0.0229055	0.315106	0.466112	0.409128	0.129422	0.292107	-0.114575	0.184729	0.446519	-0.0851294	-0.341308	-0.117516
ec_262	F13B_HUMAN	0.206418	0.109113	0.322981	-0.290079	-0.153045	0.411727	1.06896	0.685688	0.354787	0.302271	-0.0262682	0.186447	0.55542	0.339184	0.112056	-0.0271686
ec_263	MK04_HUMAN	-5.44537	-5.15731	-5.14989	-5.56333	-4.77984	-3.55499	-3.51228	-2.05589	-3.52194	-4.04464	-3.86471	-2.94528	-4.29992	-3.61217	-2.98366	-3.30135
ec_263	MK04_HUMAN	-5.63154	-5.30182	-4.96007	-5.52627	-4.52767	-3.64869	-3.94594	-3.41981	-3.68685	-4.1224	-3.69549	-3.80927	-4.19221	-5.02681	-3.43743	-4.47771
ec_264	AREG_HUMAN	-0.700592	-1.85201	-3.25724	-4.72936	-0.124682	-2.5444	-1.74834	-0.609169	-1.23725	-1.83557	-2.66813	-1.5942	-2.06921	-2.89953	-2.76032	-1.43252
ec_264	AREG_HUMAN	-2.6546	-3.59972	-3.32024	-4.71755	-0.33719	-2.65282	-0.793035	-0.743671	-0.817065	-2.65869	-2.65656	-1.16986	-2.1681	-3.18105	-3.49902	-1.78967
ec_265	Q14455_HUMAN	0.173338	0.430002	-0.205247	1.22599	0.701985	-0.758007	-0.627139	0.149301	1.50824	0.483287	-0.289326	-1.67204	0.367288	-1.25084	-0.247146	-1.19496
ec_265	Q14455_HUMAN	0.102659	0.411465	-0.196787	1.32102	0.879043	-0.8393	-0.941888	-0.311475	1.87886	0.477751	-0.417773	-2.12737	0.683047	-2.05946	0.185391	-1.55764
ec_266	ZN345_HUMAN	0.109336	0.0610403	0.201008	-0.168323	0.223841	1.357	0.543668	0.304833	0.0563197	0.155163	0.198907	0.368055	0.103288	0.38811	0.225131	0.245834
ec_266	ZN345_HUMAN	0.0557165	0.265266	0.305681	-0.147934	0.1904	1.36886	0.856743	0.438616	0.122751	0.266151	0.444051	0.405818	0.0869548	0.499283	0.212936	0.260302
ec_267	EF1B_HUMAN	1.02911	0.305306	0.00747031	1.49507	0.0666326	0.736834	0.377818	-1.21517	1.39598	0.387964	0.385553	0.0458615	1.1446	-1.21338	-0.220361	1.7761
ec_267	EF1B_HUMAN	0.949248	0.313791	-0.102864	1.58063	0.0962427	0.742201	0.38961	-1.4922	1.10166	0.339949	0.385823	-0.115447	1.12533	-1.19293	-0.0360861	1.77106
ec_268	1C01_HUMAN	-0.314771	0.0538517	-0.0405553	1.65935	1.15579	0.0187314	-0.904075	-0.816206	1.61055	0.191926	-0.224517	-0.548018	0.863378	-0.92462	-0.12469	0.0600808
ec_268	1C01_HUMAN	-0.140435	0.0907015	-0.0795432	1.70701	1.08518	0.0532895	-0.938747	-1.38767	1.7027	0.152289	-0.13983	-0.414738	0.835595	-1.35862	-0.019076	0.281696
ec_269	Z385A_HUMAN	0.358603	0.452502	0.120462	0.0138087	0.362553	-0.327674	1.2373	0.519943	0.558591	0.749532	-0.112903	-0.767011	0.218871	-0.57568	-0.0356475	-0.55023
ec_269	Z385A_HUMAN	0.426386	0.343142	0.0475617	0.291085	0.293966	-0.608671	1.32874	0.976992	0.535138	0.645103	-0.128742	-0.19458	0.293029	-0.962813	0.0422462	-1.17006
ec_270	K1C17_HUMAN	0.310548	0.441749	0.0205856	-0.00591374	-0.102565	0.100368	0.513619	0.135982	0.727573	0.27136	-0.625249	-1.1789	-0.392023	-1.26911	0.252657	-0.276123
ec_270	K1C17_HUMAN	0.791001	0.472899	0.374827	0.0486846	-0.185236	-0.0942457	0.983527	0.126114	0.69581	0.483791	-0.649963	-1.51413	-0.571826	-1.30958	0.232648	0.0470896
ec_271	SORL_HUMAN	0.308399	0.484054	-0.239891	-0.0192773	0.82019	-0.757943	-0.578237	0.174434	1.54861	0.717785	-0.413878	-1.86168	0.441415	-1.52679	-0.524378	-1.93763
ec_271	SORL_HUMAN	0.474028	0.520887	-0.276083	1.0304	0.881688	-0.804753	-0.619738	-0.186695	1.51454	0.331653	-0.581183	-2.07256	0.459964	-0.720964	-0.639731	-0.915706
ec_272	TCTP_HUMAN	-0.0390769	-0.041731	0.109904	-0.38724	0.0546365	0.401406	0.431719	3.65774	-0.205783	0.331604	0.118821	0.112503	0.0233028	0.358552	-0.473931	0.0111173
ec_272	TCTP_HUMAN	0.202639	0.0679817	0.167519	-0.440192	-0.154843	0.397842	0.538994	3.58525	-0.0944144	0.301134	0.0841899	0.0937057	-0.00801346	0.368046	-0.562976	0.489642
ec_273	ZN658_HUMAN	0.197309	-0.182241	-0.294016	0.0725374	-0.268202	-0.577794	-0.980624	-0.279951	1.01931	0.210276	-0.529638	-1.63875	-0.359456	-1.15911	-0.595335	-0.523731
ec_273	ZN658_HUMAN	0.502068	-0.382239	-0.0802649	0.127471	-0.249182	-0.657402	-0.955882	-0.544189	0.969596	0.294507	-0.552736	-1.92079	-0.104513	-1.21557	-0.464178	-0.842749
ec_274	FINC_HUMAN	0.037571	-0.236071	-0.104076	-0.39108	-0.406213	-0.00362062	0.185192	0.0659242	0.505731	0.440963	-0.671563	-0.407147	-0.201861	-0.417224	-0.30193	-0.0953245
ec_274	FINC_HUMAN	-0.0561849	0.0708425	-0.131388	-0.376202	-0.315672	0.0864207	0.36629	-0.0306663	0.322705	0.314045	-0.611584	-0.568564	-0.442462	-0.288001	-0.561182	-0.246355
ec_275	NCOR2_HUMAN	-0.274081	0.224952	-0.0499633	1.82383	1.54071	-0.388104	-1.12811	-0.95012	2.06889	0.311346	-0.0455583	-1.70659	0.997784	-1.85987	0.160247	-1.30087
ec_275	NCOR2_HUMAN	-0.134231	0.146801	-0.0426904	1.81964	1.52672	-0.416693	-1.06286	-1.14823	2.40315	0.266777	-0.0802755	-1.38102	1.12175	-2.36655	0.372605	-0.360271
ec_276	SH3R3_HUMAN	-0.214037	0.338773	-0.0161353	1.54797	1.40447	-0.404804	-1.0574	0.130532	1.7442	0.439993	-0.126664	-1.3828	0.670984	-1.54327	0.123799	-1.41131
ec_276	SH3R3_HUMAN	-0.122653	0.25255	0.0119979	1.57162	1.42266	-0.381988	-1.02141	0.110063	1.70454	0.352163	-0.150968	-1.55405	0.72785	-1.65494	0.234202	-0.544143
ec_277	LYAM1_HUMAN	0.423871	-0.224947	-0.129887	0.462368	-0.36762	-0.221106	-0.92074	-0.0996302	-0.102865	-0.411304	-0.253605	-0.805149	-0.348887	0.150997	0.0700991	-0.0853037
ec_277	LYAM1_HUMAN	0.639516	-0.287458	-0.138599	0.443842	-0.453539	-0.233028	-1.14618	-0.0421213	-0.195017	-0.510275	-0.453972	-0.986791	-0.483767	0.223613	0.26109	-0.0679981
ec_278	TPMT_HUMAN	1.38886	-0.0220307	0.0520126	0.241089	0.0188912	0.114037	0.218683	0.0754185	0.303287	-0.27275	-0.204026	-0.391389	-0.31389	-0.291781	0.360975	0.0979599
ec_278	TPMT_HUMAN	1.83108	-0.0754222	0.00550333	0.251583	-0.220434	-0.0489523	-0.251775	1.47895	0.49096	-0.226387	-0.223448	-0.425308	-0.647995	-0.236279	0.847099	0.138939
ec_279	CATB_HUMAN	-0.0187912	-0.00357154	-0.184642	0.315272	0.147083	-0.519404	0.227884	-0.767079	1.15739	0.528665	-0.797211	-1.18773	0.0495683	-0.913666	-0.051115	-0.975718
ec_279	CATB_HUMAN	0.24481	-0.0116189	-0.0895628	0.189463	0.195433	-1.02311	0.246113	-0.789147	1.07475	0.579499	-0.580817	-1.38141	-0.163012	-1.04893	0.519395	-1.30729
ec_280	AMY2B_HUMAN	0.330827	-0.295727	-0.158948	0.356639	-0.451984	-0.57596	-0.89189	-0.233534	-0.137346	-0.437792	-0.242687	-1.10856	-0.422781	0.0599862	0.148715	0.180943
ec_280	AMY2B_HUMAN	0.506699	-0.330684	-0.0849392	0.258308	-0.51636	-0.298142	-0.507575	-0.238129	-0.296763	-0.529283	-0.184966	-0.681236	-0.490796	0.0896414	0.14656	0.0788859
ec_281	RAB1A_HUMAN	0.687043	0.0471918	-0.104157	0.0218035	0.223651	-0.376216	0.353724	-0.529602	0.680332	-0.309091	0.116785	-0.594506	0.348187	-1.32706	0.592465	-0.468687
ec_281	RAB1A_HUMAN	0.939619	0.202401	-0.0614141	0.0383078	0.654316	-0.397211	0.287393	-1.02677	0.787514	-0.326046	0.000435847	-0.617719	0.461515	-1.50321	0.623577	-0.474773
ec_282	SEC13_HUMAN	0.174858	-0.0775709	0.00751803	0.0665	0.0665758	0.0211597	0.182062	0.321434	0.0176707	-0.0687141	0.0520382	-0.0699671	0.0344377	0.167157	0.187174	-0.0815176
ec_282	SEC13_HUMAN	0.132367	0.0485223	0.0799136	0.0687528	-0.00443061	0.00549326	0.120748	0.530114	0.265777	-0.0420599	0.0638623	-0.0581291	-0.0129082	0.181009	0.249013	-0.170757
ec_283	ZN593_HUMAN	-1.07991	-0.656951	-0.838773	-0.449289	-0.674079	-0.551759	-0.523841	-0.344397	0.819352	-0.812907	-0.498343	-0.560806	0.0683072	-2.03212	-0.426748	-0.284075
ec_283	ZN593_HUMAN	-1.04379	-0.708877	-0.935706	-0.466659	-0.90849	-0.515601	-0.56693	-0.723401	0.0242625	-0.897096	-0.410576	-0.583363	-0.138782	-2.12412	-0.450027	-0.744689
ec_284	LTOR1_HUMAN	-0.0236473	0.0968432	0.234072	-0.292026	0.43896	0.612012	0.830296	1.90853	0.581693	0.58544	0.211103	0.703234	0.0606441	0.490377	-0.221816	0.104438
ec_284	LTOR1_HUMAN	0.138539	0.401965	0.232629	-0.39791	0.138773	0.436354	1.04132	1.56439	0.213077	0.720222	0.326987	0.523922	0.115532	0.241321	0.154172	-0.185971
ec_285	S100A9_HUMAN	-3.19322	0.815436	0.56996	0.165561	-2.88683	2.30485	-1.15409	3.27258	-3.88715	0.709105	-0.81307	3.98686	-2.64904	4.00951	-0.525301	2.40483
ec_285	S100A9_HUMAN	-3.18594	1.30139	0.590913	0.161628	-2.95198	3.16707	-1.15199	3.25866	-4.4248	0.695728	-0.958642	4.20832	-2.69339	4.3186	-0.712709	2.85649
ec_286	ZC3HD_HUMAN	0.706363	0.37488	-0.437196	-2.07219	1.83715	0.113769	0.35232	-1.64303	0.664826	-0.905731	1.49912	-0.8074	1.54357	-0.864911	0.527575	-0.795839
ec_286	ZC3HD_HUMAN	1.22386	0.247715	-0.255543	-2.10781	1.8548	1.37415	0.374979	-0.82752	1.42343	-0.81414	1.61377	0.0272161	1.56394	-0.810121	1.20405	-0.489073
ec_287	GRP_HUMAN	-0.0433528	0.232112	-0.0842749	0.924735	1.11234	-0.144597	-0.723825	-0.625231	1.21211	0.657829	-0.365996	-0.793594	0.493627	-1.1069	-0.167943	-0.778163
ec_287	GRP_HUMAN	0.0307227	0.2706	-0.113792	1.32497	1.22926	-0.0889525	-0.654251	-0.882094	1.1321	0.294269	-0.429661	-0.908787	0.491886	-1.18627	-0.209223	-0.144734
ec_288	IFT57_HUMAN	-0.299531	0.0274482	-0.134625	1.2109	1.11579	-0.375782	-0.838483	-0.916537	1.66704	0.0583035	-0.287742	-0.8938	0.602758	-1.4393	-0.732386	-0.996716
ec_288	IFT57_HUMAN	-0.0606367	0.0565026	-0.155337	1.25803	1.27634	-0.363984	-0.835652	-1.33103	1.80187	0.0755311	-0.169739	-1.07342	0.657167	-1.78417	-0.740998	-0.469011
ec_289	O14997_HUMAN	-0.396523	0.59862	-0.262744	-0.0852825	2.90122	0.0238351	-0.337144	0.447241	-0.419652	-0.0174388	-0.880022	0.572084	-0.00476685	-0.116282	-0.834263	-0.169676
ec_289	O14997_HUMAN	-0.276366	0.695814	-0.182859	0.0548464	3.32523	-0.186756	-0.114919	0.457386	-0.375553	0.0269332	-1.12877	0.580131	0.00836873	-0.326635	-1.05276	-0.000963519
ec_290	ANFB_HUMAN	-0.449424	-0.0150827	-0.122786	0.412843	0.516417	-0.477352	-0.849018	1.1298	0.830372	0.317165	-0.270459	-0.95703	0.172056	-0.826354	-0.822216	-0.417235
ec_290	ANFB_HUMAN	-0.564241	-0.0641946	-0.131106	0.366758	-0.0130485	-0.365236	-0.604942	0.753009	0.897343	0.271979	-0.358595	-0.664434	0.174539	-0.72744	-0.578343	-0.432048
ec_291	TCF25_HUMAN	-0.467946	0.160717	-0.0981088	0.676108	0.936584	-0.314501	-0.843543	0.419385	1.34982	0.0951792	-0.154673	-0.798337	0.41367	-0.647164	-0.661286	-0.605463
ec_291	TCF25_HUMAN	-0.41138	0.132793	-0.0865785	0.694349	1.08857	-0.249139	-0.482018	0.0318806	1.53069	0.0767693	-0.320013	-0.896889	0.280648	-0.92019	-0.965219	-0.71267
ec_292	SLMO2_HUMAN	0.00945903	0.216837	0.230865	-0.190251	0.165877	0.347503	0.315878	0.217137	0.144342	0.0621121	0.357881	0.899242	0.0649112	0.739026	0.175895	0.562598
ec_292	SLMO2_HUMAN	-0.058406	0.295552	0.160534	-0.232908	0.202553	0.394087	0.290438	0.190374	0.0911845	0.200287	0.240751	0.893852	0.0294607	0.83957	0.206563	0.505676
ec_293	MTG8_HUMAN	0.262734	0.270999	0.450319	0.0660555	0.226409	0.768098	0.645883	0.70534	0.0853496	0.17096	0.443722	0.536053	0.228464	0.692201	0.342374	0.62827
ec_293	MTG8_HUMAN	0.143297	0.478228	0.331064	-0.0966992	0.157187	0.686684	0.55991	0.729612	0.224435	0.366265	0.265466	0.551673	0.159994	0.750829	0.229093	0.561326
ec_294	ASNS_HUMAN	0.205735	0.0463209	0.42901	0.315549	1.12107	0.115774	0.199299	1.65154	1.63097	0.525293	-0.117366	-0.754065	0.679741	-0.503446	-0.86915	-0.428087
ec_294	ASNS_HUMAN	0.768486	0.141791	0.495795	0.290255	1.23788	0.215055	0.356165	1.34204	1.13026	0.460194	0.0279096	-0.377866	0.487849	-0.654236	-0.577397	-0.383501
ec_295	PSMF1_HUMAN	-0.234048	0.0268856	0.205277	-0.130075	0.280655	0.609001	0.52727	0.600498	0.637897	0.561725	0.00634893	0.658492	0.179951	0.629121	-0.0490466	0.450357
ec_295	PSMF1_HUMAN	-0.04751	0.137488	0.220912	-0.163254	0.277246	0.715376	0.871185	0.521743	0.438395	0.554556	0.0924532	0.674347	0.17883	0.420733	0.0608875	0.44939
ec_296	UBXN4_HUMAN	-0.180122	0.121152	0.150293	-0.205025	0.258667	0.491856	0.421112	0.398082	0.217327	0.37277	0.132264	0.53088	0.108207	0.510218	0.0433984	0.0542663
ec_296	UBXN4_HUMAN	-0.127126	0.0903742	0.130458	-0.215326	0.368738	0.50431	0.615326	0.420445	0.259014	0.364777	0.24489	0.441206	0.190219	0.452954	0.163319	0.00993072
ec_297	XPO1_HUMAN	0.0616508	-0.198989	-0.0950164	0.216305	-0.0780878	-0.272558	-0.238492	-0.116296	-0.0502222	-0.342865	-0.158462	-0.648466	-0.211436	-0.0922345	-0.0980102	0.127301
ec_297	XPO1_HUMAN	0.331372	-0.287746	-0.1248	0.206981	-0.221544	-0.342558	-0.91698	-0.150775	-0.0619392	-0.422129	-0.179066	-0.725702	-0.36369	-0.302814	0.0536788	-0.0509155
ec_298	LAMP2_HUMAN	-0.874253	0.224098	0.269702	0.288517	0.924939	-0.323225	0.0128159	1.32743	0.782801	0.263905	-0.156066	-1.0103	0.172217	-0.635203	-1.16018	-0.386643
ec_298	LAMP2_HUMAN	-0.655627	0.208148	0.186027	0.30147	0.904963	-0.281982	0.20095	1.20433	0.999974	0.204145	-0.172469	-0.322886	0.313853	-0.666501	-0.79257	-0.265782
ec_300	RRP8_HUMAN	0.549016	0.368918	-0.118662	-1.022	1.75967	0.855633	0.609016	-0.53589	1.1797	-1.2481	1.87723	0.309154	2.4319	-0.851349	1.00204	-0.318958
ec_300	RRP8_HUMAN	0.24948	0.482497	-0.154485	-0.894934	2.11929	0.573768	0.798714	-0.803942	1.19823	-1.05682	2.02192	-0.670417	2.62898	-1.09392	0.799859	-0.48315
ec_301	YETS2_HUMAN	0.202073	0.359501	-0.134191	0.328752	1.82993	-0.0632281	0.316022	-1.52279	1.70775	-0.582245	0.802119	-1.05539	1.64348	-1.34293	0.897594	-0.621482
ec_301	YETS2_HUMAN	0.502705	0.441938	-0.130501	0.450375	1.76092	0.143776	0.400463	-1.86761	1.89797	-0.613013	0.730115	-0.635617	1.68224	-1.2812	1.05183	-0.474717
ec_302	SIA7F_HUMAN	-0.383985	0.292959	-0.127402	1.41621	1.18274	-0.412927	-0.948669	-0.293818	1.27991	0.367728	-0.190238	-1.26417	0.597799	-1.19879	-0.0418962	-0.973047
ec_302	SIA7F_HUMAN	-0.125886	0.353392	0.0372696	1.38965	1.31967	-0.418562	-1.0703	-0.632656	2.21125	0.399421	-0.279518	-1.54125	0.758255	-1.59787	0.0797209	-0.860723
ec_303	CASR_HUMAN	-0.201806	-0.213703	0.00627931	-0.327982	-0.0369169	0.2827	0.299274	0.135637	-0.205002	0.119324	-0.156457	0.197307	-0.227317	0.242136	-0.0687195	-0.0801832
ec_303	CASR_HUMAN	-0.240076	-0.00937017	0.196528	-0.279936	-0.00359229	0.209201	0.284317	0.162188	-0.0765526	0.182668	-0.0422978	0.296127	-0.30351	0.372677	0.0726643	0.0512306
ec_304	PELO_HUMAN	0.0985022	0.0188664	-0.0395981	0.20623	0.335094	-0.282148	-0.313829	0.352028	-0.159928	-0.0732138	-0.0709293	-0.284539	0.182711	-0.0800324	-0.0978993	-0.0885512
ec_304	PELO_HUMAN	0.17031	0.0278617	0.00385141	0.193044	0.233729	-0.299886	0.148863	0.296087	0.132639	0.036825	-0.1072	-0.411549	0.087471	-0.101597	0.110454	-0.139338
ec_305	CAV1_HUMAN	-0.344517	0.0544923	0.125515	1.01875	0.736506	-0.135589	-0.244048	0.267894	0.883873	0.0175714	-0.132265	-0.288573	0.47296	-1.16873	-0.209008	-0.243541
ec_305	CAV1_HUMAN	-0.265454	0.0499975	-0.0411064	1.1001	0.756171	-0.0193005	-0.228839	-0.0116852	0.870879	0.0386022	-0.0601822	-0.22701	0.508168	-1.24704	0.0795661	0.0398053
ec_306	CAV3_HUMAN	-0.54576	-0.192199	-0.198695	0.0824087	0.21474	-0.0461336	-0.00236476	0.69243	0.531391	-0.311095	-0.0599069	-0.106669	0.35762	-1.33893	0.24481	-0.056754
ec_306	CAV3_HUMAN	-0.453916	-0.195678	-0.117995	0.0855238	0.243077	-0.150374	-0.0100534	0.224662	0.329834	-0.0160472	0.0496905	-0.0934835	0.419555	-1.31532	-0.0331663	-0.171427
ec_307	CXB2_HUMAN	0.0464295	-0.0760769	-0.185575	-0.00704951	-0.305988	-0.0480623	-0.893577	1.72652	-0.267439	-0.363938	-0.630059	-0.473145	-0.3225	-0.429559	-0.485963	0.248145
ec_307	CXB2_HUMAN	-0.0585774	-0.0708307	-0.190377	0.107075	-0.420674	-0.0215054	-0.842569	2.3445	-0.121302	-0.353743	-0.985006	-0.498465	-0.501157	-0.433897	-0.515326	0.23571
ec_308	CCR7_HUMAN	5.30973	4.59789	6.28775	5.84337	5.55473	6.14779	6.40919	7.50111	4.47311	5.90409	5.7918	6.19931	3.81734	4.80263	5.44295	5.59823
ec_308	CCR7_HUMAN	5.41657	4.6979	6.42929	5.66589	5.47324	6.17249	6.51628	8.07652	5.84091	5.42424	5.87373	6.19995	5.17583	4.58698	5.64137	5.68762
ec_309	EPCAM_HUMAN	0.336082	0.115896	0.092994	-0.123569	-0.470281	0.355884	0.262943	0.91047	-0.0379292	0.0130652	-0.0824162	0.063855	-0.420275	0.116592	0.53923	0.103311
ec_309	EPCAM_HUMAN	0.270221	0.249005	0.0266223	-0.369828	-0.454044	0.447262	0.410579	0.152588	-0.0896519	0.182835	-0.139619	0.179287	-0.255978	0.427073	0.775346	0.273321
ec_310	PAK2_HUMAN	0.830599	0.225421	0.235332	-0.721463	1.28928	0.401601	2.51969	2.68493	1.28947	-0.025945	0.326108	-0.320255	0.811216	-0.198235	0.224033	-0.4393
ec_310	PAK2_HUMAN	0.952209	0.405381	0.212942	-0.861133	1.4279	0.404461	2.68575	2.5765	1.41459	0.0435996	0.22426	-0.315743	0.829393	-0.361944	-0.0698862	-0.151683
ec_311	ARI4A_HUMAN	-1.87966	-0.0542329	1.12088	0.0616311	1.29088	0.522873	0.420709	4.0711	0.566756	0.477465	0.245248	-0.953057	0.853014	-0.744281	-1.22384	-0.511537
ec_311	ARI4A_HUMAN	-1.72969	0.180563	1.26929	0.0651227	1.41465	0.478611	0.737752	3.46897	0.373501	0.417827	0.294145	-0.60798	0.792053	-1.10465	-0.714275	-0.576922
ec_312	S100P_HUMAN	0.225934	-0.0850219	-0.00329157	-0.145691	-0.14806	0.252629	0.0686021	0.305611	-0.0685296	0.0528465	0.0375596	-0.036235	-0.0537183	0.301107	-0.140924	-0.0228396
ec_312	S100P_HUMAN	0.384924	-0.190732	0.0375505	-0.149716	-0.0869331	0.122679	0.869754	-0.0649512	-0.0374734	0.354297	0.114186	0.101913	-0.266606	0.669884	0.14488	-0.0167757
ec_313	SMAD2_HUMAN	0.0527112	-0.213958	-0.0435173	-0.0222386	-0.513617	0.109859	-0.174864	2.18164	0.318423	0.356755	-0.303325	0.12625	-0.117217	0.0579592	-0.243574	-0.145701
ec_313	SMAD2_HUMAN	0.0334124	-0.26874	-0.213644	0.0182433	-0.538972	0.114302	-0.412146	2.07105	0.221235	0.308137	-0.367679	0.0956829	-0.171451	0.0961021	-0.107108	-0.084609
ec_314	PHS_HUMAN	-0.301131	0.285294	0.0525492	0.937351	0.549041	0.0109996	0.00130751	-0.612661	1.10252	0.305938	-0.0206286	-0.164044	0.48803	-0.61585	-0.0244036	-0.469493
ec_314	PHS_HUMAN	-0.140983	0.255235	0.0615127	0.982183	0.467225	-0.282145	-0.163106	-1.103	1.23573	0.306251	-0.0707543	0.00209631	0.576464	-0.628016	0.0538698	-0.216488
ec_315	TGFR2_HUMAN	-0.591724	-0.17139	0.70645	0.683392	0.366716	1.08038	-0.0556843	5.27127	-0.533496	0.0120864	-0.0427242	-0.182802	0.232963	0.0336779	-0.581167	-0.31012
ec_315	TGFR2_HUMAN	-0.597968	-0.0949055	0.893421	0.694233	0.279408	0.851965	0.104942	5.86045	-0.46823	0.0900318	0.0113161	-0.227632	0.112115	0.181774	-0.55415	-0.349824
ec_316	TSP1_HUMAN	-0.0320559	-0.50794	0.030243	-1.26601	0.00126484	0.0452522	0.457761	3.02971	-0.144869	0.112196	-0.497528	0.15964	0.226237	-0.322626	-1.60918	-0.266386
ec_316	TSP1_HUMAN	-0.30586	-0.868795	-0.0514718	-1.36443	-0.0994739	0.0614532	0.907703	4.25678	-0.510372	0.126436	-0.384886	0.584857	-0.00482574	-0.50652	-1.9334	-0.425131
ec_317	TYSY_HUMAN	0.670744	0.924518	1.26121	2.12714	2.74913	1.26659	2.25632	2.5068	2.08937	0.70546	1.07448	-0.0815004	1.71084	-0.710471	1.33347	0.765647
ec_317	TYSY_HUMAN	0.901403	1.01115	1.2767	2.23722	2.47566	0.826989	2.25511	2.0333	2.34962	0.749315	1.16169	0.44922	1.8719	-0.682865	1.7247	0.95057
ec_318	S35A2_HUMAN	0.366956	0.373331	0.196609	-0.223862	-0.0682232	0.345504	0.408378	0.0113911	-0.0328224	0.100849	0.0953041	0.0820034	-0.0235682	0.334735	0.0266711	-0.0134876
ec_318	S35A2_HUMAN	0.451681	0.167005	0.169679	-0.271707	-0.234354	0.295939	1.25091	0.251508	0.137893	0.240139	0.257595	0.190819	-0.069893	0.52591	0.460051	-0.00861744
ec_319	UPAR_HUMAN	0.530649	-0.288713	0.291853	-0.629017	0.0864969	0.508843	0.408056	2.40109	0.0594173	0.0991634	-0.304795	-0.100008	-0.211318	0.235616	-0.059625	-0.201307
ec_319	UPAR_HUMAN	0.342557	-0.329745	0.339389	-0.788923	0.132066	0.405017	0.933635	2.88564	0.201056	0.242092	-0.228459	0.020184	-0.437537	0.17812	-0.28286	-0.00765447
ec_320	UROK_HUMAN	-0.441327	-0.0147264	-0.265461	0.7036	1.04314	-0.908849	-1.17926	1.48702	1.11884	0.516119	-0.374717	-1.79181	0.596209	-1.36051	-0.659112	-1.58717
ec_320	UROK_HUMAN	-0.781285	0.458657	-0.290635	0.786392	1.13436	-0.996796	-0.753813	1.15672	1.06287	0.441538	-0.613785	-2.22664	0.713494	-1.74029	-0.732425	-1.51725
ec_321	VCAM1_HUMAN	1.52968	-0.198484	-0.0177281	1.30074	-0.218093	0.65724	1.52649	-0.499794	0.665001	0.0585243	-0.550212	-0.348124	0.222308	-1.69617	2.58774	0.719639
ec_321	VCAM1_HUMAN	1.53937	-0.210747	-0.0114825	1.42184	-0.122593	0.700917	1.49474	-0.891212	0.757399	0.111544	-0.493657	-0.197142	0.214499	-1.80592	2.59096	0.961865
ec_322	VEGFA_HUMAN	-0.110923	0.234391	0.242415	-0.1637	-0.171571	0.12103	0.637075	0.0655838	-0.195404	0.288055	-0.136585	0.241045	-0.247861	0.494348	-0.045707	-0.0134817
ec_322	VEGFA_HUMAN	0.161875	0.00792992	-0.0858227	-0.0115046	-0.228327	0.729338	0.814271	0.369062	-0.253758	0.199238	-0.102749	0.217173	-0.473986	0.33805	0.588454	-0.0492698
ec_323	WNT2B_HUMAN	0.138774	0.249671	-0.159224	-0.0172294	-0.241444	0.308747	-0.349405	1.69021	-0.106134	-0.0298303	-0.405716	-0.147818	-0.309996	0.0355571	-0.346157	0.471787
ec_323	WNT2B_HUMAN	-0.0874925	0.15634	-0.279187	-0.0367751	-0.279761	0.241741	-0.387275	1.73992	0.235719	-0.0115456	-0.657724	-0.143305	-0.248177	0.00446672	-0.310677	0.430225
ec_324	PIGC_HUMAN	-0.573029	-0.352374	0.0328689	-2.00266	-0.0526177	0.192321	1.15444	3.8154	-0.32354	-0.113452	-0.367226	0.190494	-0.0453859	0.0709122	-1.36991	-0.166982
ec_324	PIGC_HUMAN	-0.792401	-0.497139	0.058797	-1.97483	-0.0953357	0.110964	1.29105	3.89922	-0.662618	-0.448563	-0.406863	0.268091	-0.132784	0.134544	-1.32426	-0.321535
ec_325	ITB4_HUMAN	0.473005	0.18442	0.141802	0.179974	-0.138115	-0.1016	-0.240525	0.450017	0.0482541	0.0138766	-0.150156	0.126246	-0.0509573	0.390585	0.175307	0.147139
ec_325	ITB4_HUMAN	0.720634	0.292286	0.218337	0.180691	-0.244221	-0.0814273	-0.145116	0.706166	0.110976	0.505527	-0.208385	0.095043	-0.0399732	0.416275	0.242937	0.251121
ec_326	RLA0_HUMAN	0.756382	-0.0276027	-0.129203	0.248709	-0.225286	-0.244659	-0.19213	-0.0470954	0.187887	-0.250687	0.00299338	-0.58041	0.0255295	-0.13134	0.0806802	-0.114686
ec_326	RLA0_HUMAN	0.730293	-0.255688	-0.14081	0.243626	-0.527982	-0.259518	-0.184815	0.00518246	0.168057	-0.187092	-0.17106	-0.53769	-0.286949	-0.213226	0.473245	-0.147956
ec_327	SNG2_HUMAN	-0.181824	0.194199	0.106921	1.48898	1.44807	-0.421304	-0.972957	-0.883302	1.59286	0.339367	-0.253164	-1.94842	0.916573	-1.71659	0.213549	-0.906844
ec_327	SNG2_HUMAN	-0.0428162	0.239823	0.112264	1.59345	1.53108	-0.33508	-0.778332	-1.0676	1.74124	0.239237	-0.189324	-1.19449	0.672373	-1.54404	0.320416	-0.617172
ec_328	MSRE_HUMAN	-0.310111	0.151666	0.0255755	1.34443	1.37301	-0.468165	-0.93732	-0.888659	1.84983	0.478822	-0.270804	-1.35691	0.743859	-1.53665	-0.0145126	-0.578988
ec_328	MSRE_HUMAN	-0.171341	0.214715	0.0166032	1.31214	1.39388	-0.316167	-0.69325	-1.16971	1.66684	0.395609	-0.184249	-1.54104	0.833359	-1.91635	0.0657677	-0.606745
ec_329	PTMS_HUMAN	-0.189495	0.0947684	0.0383769	0.537105	1.01171	0.406986	0.327803	0.177095	1.06907	-0.108318	0.537406	0.71881	1.35504	-1.1464	1.70597	0.303571
ec_329	PTMS_HUMAN	0.0139664	0.122515	0.0295399	0.6426	0.872648	0.484753	0.392814	-0.248657	1.06759	-0.087607	0.601365	0.680952	1.17745	-0.885992	1.7856	0.538818
ec_330	CC037_HUMAN	0.0362691	0.069252	0.0299389	-0.0646522	0.0786873	-0.123934	-0.0659664	-0.123726	0.77034	0.264674	-0.0749715	-0.655945	0.0892541	-0.558683	0.0404201	-0.297691
ec_330	CC037_HUMAN	0.296085	0.072762	0.0393976	-0.14217	-0.0460549	-0.341184	0.279022	-0.326466	0.956708	0.385467	-0.352009	-0.7805	0.159425	-0.904826	0.296813	-0.576274
ec_331	CLD7_HUMAN	0.530323	-0.324541	-0.243599	0.387583	-0.5632	-0.352527	-0.642351	-0.280253	-0.268917	-0.479668	-0.624231	-1.1751	-0.671767	-0.0878902	0.11544	0.116338
ec_331	CLD7_HUMAN	0.0785101	-0.318129	-0.150755	0.418862	-0.536656	-0.250675	-0.731743	-0.182346	-0.273737	-0.571117	-0.27479	-1.098	-0.684324	0.0319412	0.186845	0.230375
ec_332	SNX3_HUMAN	0.593884	-0.0766959	0.0178364	0.389642	-0.391175	-0.147769	-0.678162	0.0895517	-0.00254918	-0.271657	-0.415938	-0.70212	-0.315665	0.0497668	0.265739	0.328656
ec_332	SNX3_HUMAN	0.307757	-0.172136	0.00509956	0.393213	-0.463575	-0.0872022	-0.546047	-0.0850628	0.0126901	-0.3427	-0.0738748	-1.08433	-0.467386	0.173095	0.336128	0.273722
ec_333	N42L2_HUMAN	0.453068	-0.180776	0.0374664	0.179561	-0.358852	-0.376471	-0.32505	-0.167703	-0.209957	-0.247087	-0.127556	-1.48367	-0.297618	-0.425903	0.186038	0.107062
ec_333	N42L2_HUMAN	0.462108	-0.208662	-0.111798	0.192331	-0.346984	-0.238215	-0.53693	-0.168118	-0.258505	-0.243899	0.110057	-0.950304	-0.376117	-0.248253	0.334987	0.173021
ec_334	TSN8_HUMAN	0.521651	-0.532741	-0.292762	0.55123	-0.614784	-0.514862	-1.39195	-0.426479	-0.248407	-0.540045	-0.490184	-1.05366	-0.479328	-0.202056	-0.0835682	-0.00835156
ec_334	TSN8_HUMAN	0.629739	-0.456842	-0.323474	0.501328	-0.781449	-0.675215	-1.65621	-0.439426	-0.385618	-0.62499	-0.630652	-1.14875	-0.681362	-0.333049	0.0529217	-0.318
ec_335	TPA_HUMAN	-1.6749	0.417146	1.03057	-0.0490357	0.19177	0.512918	0.374011	5.86072	-0.945866	-0.19019	-0.300731	-0.153798	-0.188205	0.322074	-0.439077	0.564213
ec_335	TPA_HUMAN	-1.99535	0.193477	1.46953	0.0348297	-0.0294753	0.89399	0.772832	6.44113	-0.502213	-0.112899	-0.0141966	0.0519353	-0.20338	0.474127	-0.573036	0.826935
ec_336	CYR61_HUMAN	0.523393	0.379016	-0.110382	0.00590439	1.02556	0.183583	0.473345	0.520517	1.67087	0.49793	0.104354	-1.02995	0.787418	-0.934381	0.110785	-0.873649
ec_336	CYR61_HUMAN	0.573373	0.40014	0.198405	0.128176	1.06343	-0.178722	1.00201	0.412734	1.81147	0.444498	-0.12085	-1.09785	0.918809	-0.955658	0.518747	-1.3631
ec_337	ANLN_HUMAN	0.0594469	0.430268	0.00964956	1.44844	1.70666	-0.323138	-0.620618	1.13706	1.69684	0.319596	-0.184802	-1.4497	0.523966	-1.07128	-0.294977	-1.20132
ec_337	ANLN_HUMAN	0.532147	0.48566	0.21832	1.57793	2.09937	-0.257239	-0.670673	0.803275	1.96139	0.378098	-0.154127	-2.04306	0.775163	-1.477	-0.343246	-0.529385
ec_338	CKAP2_HUMAN	0.542666	0.688402	0.413779	-0.017375	1.80388	0.711599	1.43826	2.45955	1.33078	0.42413	0.791657	0.186802	1.27809	-0.239987	0.391322	-0.223272
ec_338	CKAP2_HUMAN	0.833908	0.508241	0.355183	-0.0176328	2.1058	0.148791	1.76854	2.39343	1.11586	0.264547	0.731257	0.31842	1.52513	-0.426114	0.428767	-0.590522
ec_339	APR_HUMAN	0.409681	0.570789	0.872649	0.822646	0.748755	0.660066	1.51439	2.3307	1.37919	0.706055	0.274334	0.309125	0.514359	0.0751996	0.673069	-0.00823839
ec_339	APR_HUMAN	0.292851	0.567034	0.939942	0.91012	0.789222	0.758199	1.55715	1.79894	1.41032	0.682847	0.188972	0.279516	0.53552	-0.17564	0.948924	0.168873
ec_340	DNLI3_HUMAN	-0.209076	0.211455	-0.332503	-0.831287	0.56329	0.369573	1.04342	3.12399	-0.467718	0.6354	1.82285	0.897572	0.433133	-0.435113	-0.195176	1.14774
ec_340	DNLI3_HUMAN	-0.0783132	0.117813	-0.297892	-1.00788	0.484148	0.478845	0.192524	3.16066	-0.402142	0.989462	1.7892	0.948807	0.48793	-0.740481	0.327204	1.14654
ec_341	AFAD_HUMAN	0.0709877	0.30045	0.147798	0.931495	0.411634	0.165974	-0.0117025	-0.818878	1.1591	0.373341	-0.123559	-0.498129	0.408711	-0.686771	0.217598	-0.258623
ec_341	AFAD_HUMAN	0.0685764	0.261664	0.175515	1.05954	0.480516	-0.0818234	-0.10622	-0.896129	1.29828	0.391708	-0.261456	-0.661816	0.483271	-0.670714	0.158199	-0.105505
ec_342	MTA1_HUMAN	1.4301	0.738771	-0.157935	0.505493	2.26778	-0.130814	0.0371794	3.17668	1.10478	0.696057	-0.18762	0.0606167	0.613395	-0.596376	0.423796	-0.895054
ec_342	MTA1_HUMAN	1.36975	0.716893	-0.186864	0.513433	2.60759	-0.173092	0.526523	3.11541	1.40479	0.760923	-0.679489	0.000927257	0.409526	-0.540326	0.709338	-1.18719
ec_343	TAF4_HUMAN	-0.0355287	-0.0294788	-0.171657	1.67166	1.56787	-0.295155	-0.99065	-1.10828	2.16314	0.0511271	0.0583034	-1.61542	1.30723	-2.06419	-0.195926	-0.660757
ec_343	TAF4_HUMAN	0.128704	0.0586661	-0.180039	1.77159	1.61647	-0.243679	-0.947831	-1.15186	2.15889	-0.0821526	0.0871534	-0.841538	1.20399	-2.30023	0.096214	-0.396755
ec_344	ENC1_HUMAN	-2.21966	-1.82946	-1.84242	-1.30932	-3.74672	-0.934632	-2.1282	-1.3928	-2.05961	-1.97258	-2.19276	-0.548852	-2.32741	-2.6455	-0.637259	-0.920461
ec_344	ENC1_HUMAN	-2.12131	-1.84125	-1.77303	-1.15162	-3.7232	-0.937894	-1.80889	-1.95502	-2.11203	-1.96826	-1.99705	-0.534184	-2.49019	-2.51361	-0.222435	-0.8352
ec_345	SYMPK_HUMAN	0.694009	0.190499	0.107647	0.0548167	0.287219	0.0304899	0.067202	0.729035	0.246868	-0.0384772	0.330052	-0.59514	0.385465	0.0830852	0.313906	0.0820107
ec_345	SYMPK_HUMAN	0.798115	0.037643	0.0767888	0.0465927	0.308914	-0.0176847	0.00908918	0.132485	0.323516	-0.098172	0.477961	-0.649808	0.188951	0.0814557	0.426742	0.0796085
ec_346	MAD1_HUMAN	-1.50015	-0.0747896	0.121145	-1.9825	0.0537426	0.209968	1.44353	3.68861	-0.303075	-0.106874	0.0424403	-0.0632458	0.3174	-0.070115	-1.04329	-0.0859357
ec_346	MAD1_HUMAN	-1.68388	-0.0549162	0.230195	-1.91252	-0.232108	0.0648535	1.58061	3.34172	-0.217334	-0.479503	-0.109819	0.0979557	0.276484	-0.432629	-1.26017	-0.596331
ec_348	UB2R1_HUMAN	0.221037	0.360215	0.0589079	1.13046	0.187075	0.16083	0.139768	-0.721741	1.11164	0.394417	-0.281711	-0.0067047	0.518541	-0.68768	0.400567	0.199802
ec_348	UB2R1_HUMAN	0.112206	0.361265	0.0777197	0.964756	0.418194	0.0975326	-0.117566	-0.953927	1.09393	0.405345	-0.203528	0.00125253	0.451004	-0.589631	0.743176	0.266191
ec_349	ELAF_HUMAN	0.622896	0.415595	-0.0886533	0.659736	1.09055	-0.495316	0.0343294	-0.00294503	1.35258	0.523989	-0.24155	-1.57681	0.651795	-1.20778	0.329969	-1.18001
ec_349	ELAF_HUMAN	-0.00631918	0.314226	-0.124549	0.786476	1.23759	0.0295973	-0.162342	-0.145866	1.12279	0.488281	-0.00137716	-1.69566	0.624861	-1.40945	0.493417	-1.12293
ec_350	SPR2A_HUMAN	0.211699	0.286109	0.285474	-0.153449	-0.148464	0.702923	1.15805	0.447307	0.0647501	0.958296	0.358235	0.585665	0.0309164	0.674055	0.375212	0.204447
ec_350	SPR2A_HUMAN	0.13717	0.327688	0.300739	-0.185981	-0.200917	0.742019	1.48244	2.69818	0.366462	1.22462	0.507003	0.748788	0.246464	0.743993	0.607901	0.173023
ec_351	SRS11_HUMAN	0.277659	0.309439	0.224576	-0.340562	0.0715633	0.494079	0.893781	0.288137	0.115773	0.20746	0.180509	0.118528	-0.119109	0.169292	0.21959	-0.0234308
ec_351	SRS11_HUMAN	0.0327906	0.0653879	0.147698	-0.21783	0.0177421	0.477443	1.38585	0.46559	-0.00168633	0.139383	0.322207	0.0727315	0.0628827	0.317879	0.385871	0.0208051
ec_352	OVGP1_HUMAN	0.357653	0.292023	0.242762	-0.324372	-0.0927773	-0.0230089	0.770482	-0.234016	-0.334191	0.105471	-0.114269	-0.132988	-0.0291609	0.0621858	0.0544432	9.465e-06
ec_352	OVGP1_HUMAN	0.662559	0.271303	0.416423	-0.338633	-0.0295302	0.283606	1.07284	0.170838	-0.238058	0.189378	0.00362876	-0.170432	-0.347413	0.329941	0.399386	0.336763
ec_353	CD2A1_HUMAN	-0.656125	1.52385	0.169021	0.331736	0.230359	0.426323	0.137019	2.61337	0.926659	0.125063	0.303439	0.0287591	0.0420674	0.293973	-0.0356365	0.141835
ec_353	CD2A1_HUMAN	-1.18834	1.22775	0.275944	0.446942	0.123638	0.5625	0.313207	2.49695	1.05266	0.0699882	0.174209	0.0938921	-0.0192827	0.246189	0.0231881	0.240062
ec_354	K1C14_HUMAN	0.140571	0.16835	0.286698	0.176669	-0.033177	0.706864	0.173487	0.491793	-0.111112	0.404452	0.0887782	0.285644	-0.313075	0.54319	0.150442	0.263007
ec_354	K1C14_HUMAN	0.289246	0.156698	0.349377	0.264273	-0.148553	0.439799	0.623828	0.528249	0.0812645	0.394531	0.0321111	0.254099	-0.334712	0.546716	0.259883	0.487075
ec_355	NPT1_HUMAN	-0.311821	0.405511	0.672527	-0.192918	0.637069	0.143509	0.792904	-0.153256	0.0641626	-0.116078	0.23776	-0.25044	0.584186	0.374636	0.0690807	0.0597281
ec_355	NPT1_HUMAN	0.16832	0.116355	0.940171	-0.17256	0.0210237	0.33368	1.59261	-0.134392	0.000361372	-0.29037	0.934931	-0.201696	0.683399	0.242528	0.887793	0.174733
ec_356	T4S4_HUMAN	0.424009	0.41285	-0.315721	-0.415226	-0.0523155	-0.365792	-0.515084	3.54245	0.30282	-0.0804174	-0.6196	-0.12289	-0.134085	-0.931056	-1.20993	-0.40245
ec_356	T4S4_HUMAN	0.0331471	0.316466	-0.264722	-0.394403	-0.0370416	-0.212576	-0.278917	3.16265	0.156732	-0.117367	-0.701399	0.0892858	-0.0844607	-0.846336	-1.08561	-0.586435
ec_357	TSN1_HUMAN	0.389315	-0.246213	0.0363736	0.274269	-0.452081	-0.258625	-0.521072	0.289213	0.0515107	-0.187914	-0.297669	-0.576619	-0.412785	-0.439194	0.225024	-0.123847
ec_357	TSN1_HUMAN	0.358703	-0.27974	0.017542	0.260131	-0.641706	-0.26882	-0.522921	0.160553	-0.148785	-0.246525	-0.481631	-0.661246	-0.605256	-0.3651	0.412436	-0.256827
ec_358	TS101_HUMAN	0.432155	-0.237214	0.201237	0.197502	-0.668886	-0.183298	0.198015	-0.305166	0.0274078	-0.178566	-0.139029	-0.314611	-0.339555	-0.151863	0.494646	-0.151785
ec_358	TS101_HUMAN	0.374892	-0.210407	0.220762	0.140749	-0.856315	-0.206031	0.114546	-0.00488107	-0.180308	0.0734349	-0.280683	-0.33497	-0.561332	-0.0443565	0.549609	-0.143733
ec_359	TSN6_HUMAN	1.52995	0.201089	-0.186717	1.07091	1.26889	0.115112	-0.182516	1.28535	0.530728	0.346646	0.0293718	0.610952	0.826435	-2.00323	0.37852	-0.00452237
ec_359	TSN6_HUMAN	1.36024	0.2498	-0.15271	0.957203	1.35824	0.0838711	-0.206011	0.559601	0.643349	0.402269	-0.0622028	0.548937	0.91085	-1.88016	0.530183	-0.0411826
ec_360	SPS1_HUMAN	0.762242	0.175847	-0.173023	0.613879	0.435875	-0.502164	-0.811758	0.128458	0.416879	0.529229	-0.289646	-1.69685	0.235098	-1.24869	0.453662	-0.89275
ec_360	SPS1_HUMAN	0.726665	0.30196	-0.184764	0.627472	0.424979	-0.469078	-0.529078	-0.0125257	0.2731	0.342698	-0.540103	-1.38721	0.221992	-1.70182	0.637533	-0.673665
ec_361	IL1B_HUMAN	0.34459	0.00142426	0.365483	-0.227556	-0.250708	0.173427	0.675757	0.0158194	0.0290796	0.640098	0.236741	0.31257	-0.121884	0.326199	-0.0434029	-0.188764
ec_361	IL1B_HUMAN	0.554588	-0.0139146	0.557219	-0.213833	-0.372485	0.194278	1.48076	0.649096	-0.0325605	0.56263	0.361122	0.430594	-0.0294446	0.466847	0.663671	-0.129094
ec_362	MUC2_HUMAN	0.324184	0.546969	1.77047	0.537084	0.975392	1.47584	1.03807	6.30517	0.865639	1.36462	0.529965	1.59107	0.703661	1.69127	-0.767027	1.18773
ec_362	MUC2_HUMAN	0.497697	0.754955	2.08354	0.722827	1.08114	1.81947	1.50641	6.13444	0.972909	1.4323	0.511686	1.52285	0.646242	1.76732	-0.901388	1.23524
ec_363	EWS_HUMAN	-5.36087	-0.932806	-0.527975	-2.38927	-0.949211	-0.140589	-0.654742	4.29058	-2.87672	0.673431	-2.16138	-0.118748	-1.93287	-0.416306	-3.09653	-0.246486
ec_363	EWS_HUMAN	-5.69804	-1.29477	-0.547798	-2.52476	-1.05807	-0.239367	-0.689316	4.71005	-3.07543	0.472581	-2.67358	-0.204847	-2.41378	-0.633915	-3.76915	-0.55549
ec_364	FUS_HUMAN	-3.81914	0.781928	-1.7589	-2.60008	1.94799	-0.436441	-1.16189	1.33557	-0.714635	1.14674	-1.27287	1.69709	1.25411	-1.28247	-2.96989	-0.544116
ec_364	FUS_HUMAN	-2.79638	0.658195	-1.91797	-2.72645	1.80069	-0.468704	-1.32233	1.39486	-0.584002	1.07417	-1.12203	1.67489	1.39342	-1.3007	-2.54427	-0.733822
ec_365	TRXR1_HUMAN	1.16765	0.91058	0.63142	0.0914546	1.00793	0.955136	1.07098	3.94674	0.612312	0.688698	0.705734	0.601529	0.306403	-0.337277	0.139504	0.111811
ec_365	TRXR1_HUMAN	0.681227	0.865982	0.667153	0.104514	1.05286	0.988609	1.27877	4.46223	0.729113	0.739917	0.923846	0.615805	0.0976124	-0.333454	0.160757	-0.00556392
ec_366	NAP1_HUMAN	0.782253	0.659004	1.10963	0.077705	0.762089	1.50041	1.70177	5.39748	0.934967	0.856439	0.875473	1.18522	0.601082	0.972048	-0.0471237	0.546526
ec_366	NAP1_HUMAN	0.507634	0.753863	1.13033	0.132132	0.740398	1.47767	1.67841	5.35563	0.947644	1.1018	0.893808	1.21224	0.780319	1.03224	0.0809367	0.502306
ec_367	P73_HUMAN	0.31114	0.195335	-0.215295	-0.341406	0.464588	-0.114565	-0.103426	0.523377	-0.0149647	0.282004	-0.0512324	0.373833	-0.0332365	-0.212727	-0.149151	0.234344
ec_367	P73_HUMAN	0.151674	0.0232314	-0.293125	-0.385116	0.542371	-0.324881	-0.214726	0.562876	0.00905716	0.239541	-0.0689726	0.379288	-0.0478508	-0.0766011	-0.00699319	0.0838352
ec_368	P63_HUMAN	0.840836	0.577104	0.390375	-0.358494	-0.19766	0.481283	1.36208	-0.119266	-0.111286	0.577533	0.145709	0.0861608	-0.0949096	0.415288	0.090101	0.252656
ec_368	P63_HUMAN	0.890197	0.569289	0.66101	-0.269969	-0.32064	0.220349	1.4901	0.345796	-0.155433	0.445539	0.442836	0.251434	-0.337924	0.517944	0.607567	0.893352
ec_369	P53_HUMAN	0.385539	0.630697	-0.260475	-0.480262	1.55308	1.00201	-0.0590638	0.0899597	0.408341	0.547097	0.841112	0.367582	1.10835	0.353871	0.703226	0.0244177
ec_369	P53_HUMAN	0.476437	0.6072	-0.256413	-0.449294	1.62734	0.940184	0.290034	-0.175916	0.845233	0.309422	0.828258	0.443459	0.911486	0.488371	0.817454	0.679066
ec_370	ACTG_HUMAN	-0.00861616	0.277694	0.0457207	-0.135019	-1.60541	0.872506	1.17771	1.11538	-0.057309	1.0456	0.868802	2.69203	-0.830554	1.14563	1.96463	0.474576
ec_370	ACTG_HUMAN	0.116508	0.449042	0.0781975	0.297213	-1.81524	0.869059	1.04648	0.952688	0.079263	1.22846	0.938348	2.63195	-0.770798	1.23473	2.19309	0.644833
ec_371	ENOG_HUMAN	-2.8574	-3.9602	-3.51285	-2.63827	-4.35865	-1.84734	-2.42863	-2.97337	-2.47495	-2.38595	-3.40105	-0.259495	-3.27309	-2.57785	0.286114	-1.80126
ec_371	ENOG_HUMAN	-2.64717	-3.93628	-3.62821	-2.5658	-4.31391	-1.97205	-2.368	-2.9927	-2.74981	-2.22682	-3.37909	-0.0819669	-3.29488	-1.16738	0.0238329	-1.44292
ec_372	MAMC2_HUMAN	-0.145271	0.1934	-0.0103958	1.45026	1.46826	-0.270426	-0.74066	-0.528657	1.88036	0.439698	-0.155211	-0.897354	0.862308	-1.76312	-0.168092	-0.696615
ec_372	MAMC2_HUMAN	-0.0896092	0.137033	-0.00713929	1.47689	1.4352	-0.183054	-0.655564	-0.958354	2.25175	0.226864	-0.131043	-0.898165	0.932664	-1.95411	0.0820074	-0.593972
ec_373	FGF1_HUMAN	-0.0626537	-0.225335	-0.22105	-0.0571883	-0.198458	-0.19371	-0.207216	-0.167929	0.0989116	-0.119271	-0.232337	-0.178943	-0.139306	-0.0938181	-0.149287	-0.153736
ec_373	FGF1_HUMAN	0.0203467	-0.148019	-0.214918	-0.00927509	-0.264192	-0.198471	-0.202867	-0.0733522	0.0537239	0.0032639	-0.162891	-0.123714	-0.218085	-0.083598	-0.0593364	0.0918735
ec_374	TRI22_HUMAN	-2.58656	1.12362	1.39671	-1.47892	0.290868	0.0163994	-1.48572	3.07736	2.62795	2.15805	-0.845987	0.202026	-0.187173	-1.49249	2.4471	0.0917692
ec_374	TRI22_HUMAN	-2.76728	1.36429	1.46998	-1.35463	0.314032	0.0550649	-1.55121	3.07084	2.77175	2.23193	-0.884156	0.177665	-0.569042	-1.29585	2.73232	0.594645
ec_375	SEPR_HUMAN	-0.205158	-0.90763	-0.585596	-0.427752	-0.775478	-1.47937	-0.321033	-0.299987	0.986056	-0.119276	-0.845051	-0.92074	-0.654761	-0.925202	0.146839	-1.77083
ec_375	SEPR_HUMAN	-0.218924	-0.670993	-0.435162	-0.316822	-0.708783	-1.64934	0.0123612	-0.281906	1.21595	0.828363	-1.0146	-1.03671	-0.627294	-1.22921	-0.00594273	-1.2833
ec_376	MAD4_HUMAN	0.0750175	-0.125923	-0.0709285	0.0241512	-0.0102555	-0.0336423	-0.0114438	-0.150663	-0.0865509	-0.0695799	2.6847e-05	-0.0794163	-0.0467877	0.0529814	-0.0347053	-0.0206211
ec_376	MAD4_HUMAN	0.0767657	-0.0933929	-0.112049	-0.0111836	-0.0745428	-0.0726341	-0.00727619	-0.0381807	0.129775	-0.0254971	-0.0247662	-0.0427909	-0.101643	0.0097909	-0.0137686	-0.0304789
ec_377	IFI6_HUMAN	0.380314	0.234992	-0.558479	-0.00600536	1.98169	-1.37009	-2.40196	-1.38	0.0605087	0.00707788	-0.925547	-1.76863	-0.0390622	-2.02414	0.361223	-2.0479
ec_377	IFI6_HUMAN	0.540858	0.344422	-0.615473	0.0334812	2.11158	-1.55561	-2.24387	-1.53405	1.01246	1.01287	-0.782432	-1.91031	0.496621	-2.2356	0.330612	-2.23492
ec_378	AKA12_HUMAN	-0.0259303	-0.149602	-0.0941236	-0.0330099	0.0176765	-0.0458228	-0.0957773	-0.1903	-0.149002	-0.0662112	-0.0293821	-0.0852075	-0.0384041	0.0082069	-0.103236	-0.0495767
ec_378	AKA12_HUMAN	-0.00448261	-0.154576	-0.125112	-0.0322561	-0.0311461	-0.0583334	-0.018357	-0.124457	0.0241759	-0.000650832	-0.0248514	-0.0463953	-0.0364515	-0.0198963	-0.0312455	-0.0489352
ec_379	GAS6_HUMAN	-0.207294	0.682759	2.02326	-0.651031	0.73431	1.03807	-0.381571	3.29988	2.43588	0.974506	-1.28713	0.0310835	0.0833235	-0.492143	0.22286	-0.65245
ec_379	GAS6_HUMAN	-0.133792	0.224743	1.29341	-0.498776	0.507621	1.19069	-0.77263	3.85171	2.0707	1.40812	-1.56138	0.101571	0.124981	-0.343516	0.163259	-0.91024
ec_380	MMP1_HUMAN	-0.10458	-1.39035	3.44122	1.0487	2.20696	2.40677	-1.55519	5.19508	-1.75999	1.83577	-1.88598	-0.417508	-0.18683	-0.651568	-0.135129	-1.78922
ec_380	MMP1_HUMAN	-0.220742	-1.14023	2.94096	1.43995	2.23297	2.71072	-2.11386	7.49334	-0.758287	0.971141	-1.20998	-0.99415	-0.26409	-0.816864	-0.436304	-2.0815
ec_381	ID3_HUMAN	0.040112	-0.0407184	-0.103161	-0.0513225	0.0737037	0.275129	0.0102412	0.0172087	-0.0015868	0.0491159	-0.000656379	-0.000431312	-0.0168487	0.141088	0.0207839	-0.0594778
ec_381	ID3_HUMAN	0.0359615	-0.0376113	-0.0175382	-0.000283801	0.018063	-0.0279065	0.109604	0.0494322	0.0987321	0.0131482	-0.0233886	-0.00312646	-0.0587565	0.127819	0.0952777	-0.0454502
ec_382	MK12_HUMAN	0.0211967	-0.0811174	-0.0374108	0.0206995	0.0885421	-0.0349242	0.127075	-0.0557739	-0.0185681	0.0235002	-0.112651	-0.0573269	0.0374766	-0.0138333	0.0621541	-0.0420507
ec_382	MK12_HUMAN	0.0900541	-0.0975404	-0.0428728	0.12635	0.0239217	-0.0557629	0.24615	0.00782877	-0.0748878	0.0511015	-0.0617799	-0.0424515	-0.052907	0.0506358	0.140466	-0.0822162
ec_383	K2C8_HUMAN	0.182407	-1.2079	3.76722	-0.277365	2.02216	3.00092	-1.65673	6.76415	-1.74209	1.11529	-1.20948	-0.526989	-0.26329	-0.362783	0.203197	-1.35676
ec_383	K2C8_HUMAN	0.377091	-0.690643	3.96843	0.763473	2.22448	3.87895	-1.09927	7.43999	-2.00724	1.64154	-1.57958	-0.78212	-0.338264	-0.472247	0.11961	0.180552
ec_384	ISOC2_HUMAN	0.958585	0.568622	0.0843827	-0.341942	0.0466866	0.239963	-0.0492151	1.10833	-0.137708	0.738029	-1.13469	0.237601	-0.696731	0.107422	0.260101	0.448959
ec_384	ISOC2_HUMAN	1.0651	0.816737	0.190768	-0.372109	-0.0338007	0.331888	-0.0105248	0.12235	0.0482833	0.904752	-1.36565	0.3386	-0.175133	0.0424364	0.416435	0.821349
ec_385	RBM3_HUMAN	0.238088	0.370718	0.049492	0.151148	0.144982	-0.0565601	0.0913775	-0.0467824	-0.0513398	0.15975	0.147404	0.0683018	0.087367	0.118816	0.0884785	-0.0580615
ec_385	RBM3_HUMAN	0.311847	0.291851	0.0917627	0.0362147	0.0600394	0.00171609	0.154312	0.0289938	0.0688187	0.0770814	-0.00586375	0.0449938	-0.00642764	0.104323	0.0785489	0.458242
ec_386	TMM54_HUMAN	-0.0735543	-0.599623	3.66495	1.37742	2.29822	2.17375	-1.24338	5.275	-0.654158	1.72984	-1.03219	-1.22739	-0.210664	-0.73138	-0.2612	-1.77771
ec_386	TMM54_HUMAN	-0.272228	-0.729889	3.73258	1.38448	3.41416	2.36327	-1.36373	5.05674	-0.787883	1.86486	-1.29535	-1.27502	-0.44335	-0.929885	-0.279916	-1.22801
ec_387	RRAGC_HUMAN	-0.212922	0.29611	-0.120102	-0.0965039	0.13908	0.265426	-0.167349	0.33849	-0.136767	0.164873	-0.0811732	0.265582	0.0787261	0.13098	-0.132772	0.153223
ec_387	RRAGC_HUMAN	0.0862885	0.347294	0.068323	-0.0117763	0.0615987	0.224706	0.384053	0.424288	-0.0714856	0.034883	-0.00296959	0.261028	0.0411288	0.110382	0.179282	0.488492
ec_388	MELPH_HUMAN	-0.224978	-0.142679	-0.330736	-0.176195	-0.0833424	-0.251101	-0.761774	-0.108383	-0.181882	-0.116762	-0.311374	-0.191016	0.0460433	-0.175967	-0.442089	0.291983
ec_388	MELPH_HUMAN	-0.355058	-0.130735	-0.402526	-0.232941	-0.0797797	-0.308347	-0.764838	-0.0751705	-0.0323196	-0.0298729	-0.183055	-0.164733	-0.172146	-0.276006	-0.407522	0.294294
ec_389	MLP3B_HUMAN	-0.117555	-0.138735	-0.295347	-0.139579	-0.0207284	-0.199363	-0.599071	-0.0648997	-0.061436	-0.159273	-0.244455	-0.199359	0.142201	-0.223552	-0.381723	0.238295
ec_389	MLP3B_HUMAN	-0.0839276	-0.0469999	-0.286454	-0.165426	-0.104426	-0.273545	-0.537443	-0.0578635	0.033489	-0.0478223	-0.188689	-0.136094	0.0542957	-0.151531	-0.282506	0.325897
ec_390	UN93B_HUMAN	0.418617	0.563317	0.431251	0.410524	0.492863	0.399648	0.594851	0.014533	-0.00209424	-0.0287485	-0.0176882	0.442187	0.470746	0.213487	0.796728	0.90705
ec_390	UN93B_HUMAN	0.283368	0.481357	0.298187	0.378642	0.240756	0.45357	0.467726	-0.0844277	0.876658	0.71595	-0.187199	0.176103	0.425828	0.120794	0.787635	0.485131
ec_391	C2C4B_HUMAN	0.409505	0.144879	-0.00609627	-0.284263	0.513635	0.0760347	0.116122	0.0636688	0.335801	0.187501	-0.0359307	0.244477	-0.116447	-0.0350258	-0.0308327	0.222464
ec_391	C2C4B_HUMAN	0.294898	0.0295338	-0.160505	-0.316521	0.123893	-0.0129039	-0.122233	0.0933238	0.187243	0.44475	-0.128506	0.155654	-0.0887974	-0.143709	-0.0712811	0.203114
ec_392	DHRS2_HUMAN	0.770288	0.479146	0.546105	0.301806	0.399912	0.973071	0.927511	0.462506	0.235815	0.622471	0.549756	0.788869	0.455405	0.845376	0.609355	0.499945
ec_392	DHRS2_HUMAN	0.853746	0.581232	0.648891	0.365499	0.365841	1.05885	1.17625	0.601915	0.384014	0.775752	0.687485	1.03983	0.406105	1.3395	1.01868	0.596982
ec_393	AZI2_HUMAN	-0.0855171	-0.0392023	-0.0109391	-0.319203	0.0227986	0.35032	0.0253146	-0.0609547	-0.0308838	0.46608	-0.00755042	0.111199	0.0519407	0.279737	-0.158536	-0.0806117
ec_393	AZI2_HUMAN	0.121388	-0.12258	0.0654634	-0.322936	-0.119187	0.396184	0.489878	0.781776	0.0589983	0.510828	0.0819678	0.352424	-0.154029	0.325433	0.105086	-0.094969
ec_394	TSN16_HUMAN	-0.0643903	-0.210319	-0.119782	-0.120086	-0.103624	0.32577	-0.0970306	-0.0577253	-0.136037	-0.0396448	-0.0730271	-0.0600792	-0.062597	0.0249405	-0.132557	-0.096936
ec_394	TSN16_HUMAN	-0.0500855	-0.147535	-0.107316	-0.0344619	-0.118616	0.646861	-0.0808737	-0.130052	0.0557249	0.0572537	0.0108254	-0.108607	-0.0526697	-0.158412	-0.114785	-0.0545443
ec_395	IFIT2_HUMAN	-0.203003	-0.217425	-0.202977	-0.0769364	-0.0685227	-0.0707769	-0.415059	-0.144788	-0.159778	-0.212384	-0.169905	-0.147301	-0.0204288	-0.192073	-0.410884	-0.148966
ec_395	IFIT2_HUMAN	-0.118555	-0.27711	-0.310328	-0.0794621	-0.113885	-0.195138	-0.291642	-0.204551	0.0586049	-0.0821304	-0.111278	-0.0871668	-0.0784887	-0.143935	-0.113382	-0.102563
ec_396	PYRG1_HUMAN	-0.134413	-0.189459	-0.111074	-0.0835627	0.175362	-0.0098588	-0.260127	-0.025256	-0.0716544	-0.00358766	0.0254202	-0.0209167	0.0729527	0.0110666	-0.152533	-0.0371799
ec_396	PYRG1_HUMAN	-0.442016	-0.154373	-0.181517	-0.0532053	0.128742	-0.0563697	-0.277571	-0.067677	0.124975	-0.00809168	-0.0220686	-0.1367	0.0143011	-0.00651382	-0.174739	-0.155357
ec_397	RAD52_HUMAN	0.202243	1.26435	2.1456	2.52957	0.771469	2.61734	3.17189	4.50947	-0.32926	0.557277	1.14517	1.14301	0.640817	0.615879	1.43086	1.88258
ec_397	RAD52_HUMAN	0.0904969	1.45595	2.25817	2.64713	0.836153	2.62743	3.20463	3.5343	-0.291359	0.600674	1.2227	1.07956	0.566902	0.736309	1.86919	1.78913
ec_398	ZG16_HUMAN	0.777026	0.110023	0.670879	0.832655	1.20323	1.01273	1.03022	1.075	0.358096	-1.07817	1.34492	-0.522706	2.15391	-0.740678	1.09265	-0.0896899
ec_398	ZG16_HUMAN	1.13472	0.214631	0.734695	0.924604	1.13885	1.0776	1.19556	0.799317	0.495256	-0.630809	1.85389	-0.276898	2.25063	-0.708785	2.01113	-0.170005
ec_399	Q6ZNL3_HUMAN	-1.41111	-0.604592	-0.855567	-0.469899	1.3295	-0.988992	-0.988675	-0.528271	0.532577	-0.878903	-0.00557867	-0.661495	0.94708	-1.72699	-1.22399	-0.733609
ec_399	Q6ZNL3_HUMAN	-1.48181	-0.583904	-0.889812	-0.423154	1.20666	-1.06871	-1.03691	-0.7049	0.251035	-0.933375	-0.195003	-0.252071	1.20598	-2.41696	-1.7273	-1.40807
ec_400	N42L1_HUMAN	-0.11929	-0.127225	-0.028569	-0.240569	-0.274629	-0.123008	-0.157225	-0.106024	-0.260309	-0.181433	-0.105408	-0.110085	-0.320621	0.180308	-0.0853279	-0.152825
ec_400	N42L1_HUMAN	-0.222919	-0.132375	0.167539	-0.218717	-0.339988	-0.0858013	0.0671766	-0.125675	-0.317663	-0.180141	-0.0136433	-0.146573	-0.269305	0.153343	-0.0286051	-0.106593
ec_401	ZDHC6_HUMAN	0.105069	0.146241	0.105367	-0.121405	0.112913	1.26922	0.277209	0.119462	0.180293	0.369071	0.392477	0.623355	0.211285	0.132217	0.376543	0.270815
ec_401	ZDHC6_HUMAN	0.11907	0.348414	0.146444	-0.0868542	0.437088	1.50199	0.330184	0.181405	0.0103378	0.250079	0.462842	0.652306	0.142397	0.281832	0.431233	0.267262
ec_402	TIP_HUMAN	0.0337442	-0.0909112	0.267678	-0.0633635	-0.189518	0.114592	0.442341	0.0808013	-0.11018	0.21136	0.0704635	0.129206	-0.0775295	0.119642	0.457862	-0.128738
ec_402	TIP_HUMAN	0.308119	-0.0170772	0.100336	-0.091627	-0.247188	0.0471362	0.348036	0.119587	-0.0170142	0.104528	0.12216	0.130975	-0.159498	0.0310273	0.522257	-0.0251546
ec_403	MTA2_HUMAN	0.261059	0.122542	0.144765	-0.136292	-0.131408	0.112016	0.450745	-0.124091	-0.0809291	-0.142245	-0.104292	0.013237	-0.197429	-0.0144115	-0.127111	-0.0915296
ec_403	MTA2_HUMAN	0.175975	-0.00371479	-0.102777	-0.0562803	-0.29292	0.0622065	0.0313049	-0.07375	-0.294704	-0.0377274	-0.139133	-0.0783993	-0.240749	-0.00436128	-0.121633	-0.210155
ec_404	PCH2_HUMAN	-0.00075611	0.225602	0.0965892	-0.169735	-0.182294	0.153256	0.174163	-0.0524956	-0.128119	-0.0394324	0.16276	0.223426	-0.201132	0.293099	0.110003	0.293607
ec_404	PCH2_HUMAN	-0.114183	0.14633	0.14348	-0.15199	-0.208893	0.222327	0.281444	-0.0680257	-0.0144225	-0.0163005	0.0790613	0.19816	-0.190124	0.331579	0.114945	0.299088
ec_405	CK5P3_HUMAN	-0.108716	0.0753135	0.0327889	-0.122053	-0.0024795	0.034992	0.0379104	0.0115246	-0.0651646	0.111703	0.109355	0.205017	-0.154279	0.249056	0.144713	0.137653
ec_405	CK5P3_HUMAN	-0.0878177	0.15576	0.129643	-0.183514	-0.292282	0.164316	0.73458	0.00889471	-0.0525381	0.262274	0.166517	0.217291	-0.173246	0.269883	0.236597	0.180876
ec_406	RWD2A_HUMAN	0.428395	-0.0447246	2.22464	1.37757	0.129691	2.06295	0.0235513	2.74156	-0.604126	0.370269	0.442997	0.892805	-0.171084	0.90221	1.05062	0.507628
ec_406	RWD2A_HUMAN	0.367722	-0.057174	2.4757	1.40489	0.153199	2.15823	-0.0532918	2.86567	-1.08076	0.480372	0.281595	1.19466	-0.237964	0.966088	0.809153	0.372935
ec_407	RL3_HUMAN	0.0795456	0.00615843	0.256301	0.0529803	-0.487725	-0.140733	0.430785	-0.0293359	-0.00253327	-0.0790626	-0.000869965	-0.0381435	-0.0922509	0.170759	0.0155117	0.0426324
ec_407	RL3_HUMAN	0.0674999	0.0615818	0.190317	0.00456466	-0.46365	0.0297218	0.283185	0.228742	-0.0169928	0.0291845	-0.0386314	0.237615	-0.243246	0.233624	0.470928	0.171256
ec_408	BCL3_HUMAN	0.177624	-0.0354643	0.00329073	-0.00618273	-0.306396	-0.0829662	-0.135965	-0.195044	-0.147239	-0.246509	-0.0217413	-0.324511	-0.165432	0.0588492	-0.0021069	-0.197853
ec_408	BCL3_HUMAN	0.405952	-0.159476	0.0621965	0.098625	-0.349999	-0.0488777	0.149959	-0.168194	-0.156113	-0.148673	0.0619915	-0.286937	-0.145231	-0.0717688	0.103426	-0.190834
ec_409	UXS1_HUMAN	0.421301	-0.739313	2.63978	0.926812	0.969668	1.79776	-0.811978	4.61626	-0.959284	0.633149	-0.653672	-0.61095	-0.331641	-0.121582	-0.093354	-0.873801
ec_409	UXS1_HUMAN	0.376441	-0.948859	2.87133	1.14671	1.03632	1.90821	-0.689701	4.64287	-0.869048	0.547036	-0.370119	-0.359884	-0.347455	-0.0827538	0.0180508	-0.819723
ec_410	SMAD3_HUMAN	-0.0684277	-0.211265	-0.152367	-0.0986689	-0.175188	-0.146851	-0.188655	-0.203481	-0.16199	-0.189293	-0.0829716	-0.126666	-0.0890562	0.0177238	-0.139158	-0.115829
ec_410	SMAD3_HUMAN	-0.0164141	-0.159226	-0.136063	-0.14086	-0.222319	-0.189341	-0.0734224	-0.19663	0.0543806	-0.0614734	-0.0242875	-0.083149	-0.150295	-0.00791592	-0.0111199	-0.114571
ec_411	PQLC1_HUMAN	0.0322047	-0.138483	0.250723	0.0223899	-0.430409	0.00938749	0.38157	-0.171135	0.0209099	0.00889451	0.000700382	0.00554656	-0.223464	0.277526	0.0643808	-0.198986
ec_411	PQLC1_HUMAN	0.0731226	-0.19552	0.112832	-0.00518582	-0.538014	0.0352528	0.553629	0.195169	-0.0559183	0.218458	0.123458	0.0509303	-0.334798	0.178764	0.413989	-0.24889
ec_412	RBL2_HUMAN	-0.0483605	-0.180385	-0.0928356	0.0154504	-0.0923171	-0.00566255	-0.0709824	-0.187527	-0.195118	-0.0913814	-0.0210751	-0.0934638	-0.0265191	0.0935747	-0.108361	-0.136157
ec_412	RBL2_HUMAN	-0.287929	-0.169635	-0.137994	0.0625843	-0.190379	-0.0863241	-0.063562	-0.0499219	0.00556654	-0.0782158	-0.00108492	-0.118956	-0.113977	0.140799	0.0161879	-0.151765
ec_413	NAA50_HUMAN	-0.039648	-0.0943067	-0.0751611	0.100568	-0.219687	0.252784	0.107904	-0.0828465	0.0374426	-0.0322953	-0.0366795	-0.083305	-0.16412	0.212589	0.00543658	-0.169851
ec_413	NAA50_HUMAN	-0.104041	-0.0925287	0.00830393	0.214502	-0.337214	0.227506	0.145172	0.0391117	-0.291904	0.00353486	-0.0817977	-0.0650568	-0.197855	0.292852	0.217986	-0.0626161
ec_414	LYAM1_HUMAN	-0.0612536	-0.20063	-0.0956908	0.0627437	-0.0655058	-0.128893	-0.260414	-0.206294	-0.0616843	-0.0966358	-0.0515858	-0.159462	0.028498	0.0062884	-0.053422	-0.153363
ec_414	LYAM1_HUMAN	-0.0423704	-0.171266	-0.118878	0.0455666	-0.136997	-0.103753	-0.00757777	-0.106789	-0.220743	-0.0755867	0.0495756	-0.195746	-0.0267231	-0.0230484	0.0631869	-0.112408
ec_415	RP9_HUMAN	0.538885	-0.826359	-0.445282	2.05231	-3.32019	1.14747	0.788825	0.354975	-1.38633	-0.93811	-0.950944	2.2332	-1.95173	-1.18622	2.89488	1.74424
ec_415	RP9_HUMAN	0.42823	-0.597471	-0.347239	2.03802	-3.27675	1.04992	0.722846	0.288673	-1.58441	-1.02745	-1.30375	2.23994	-1.94101	-1.35478	2.81856	1.77257
ec_416	DHX40_HUMAN	0.750049	0.0454097	0.00661521	-0.360237	-0.294029	-0.0482306	0.116133	1.09356	-0.291541	-0.139932	-0.331781	-0.109895	-0.228817	-0.251641	-0.0121837	-0.230741
ec_416	DHX40_HUMAN	0.0664451	-0.0802055	0.252965	-0.399352	-0.331155	-0.00203719	0.274446	1.3108	-0.301069	-0.173521	-0.313397	-0.133048	-0.349912	0.0904052	0.0625547	-0.162537
ec_417	KLH12_HUMAN	0.127528	0.132311	0.204675	-0.0388566	-0.414912	0.189283	0.674618	0.164411	-0.0736658	0.620125	-0.0120424	0.169722	-0.3592	0.344406	0.289424	-0.137603
ec_417	KLH12_HUMAN	0.374153	0.106853	0.351742	0.0394002	-0.476411	0.101644	0.552844	0.23855	-0.0147732	0.535664	0.209676	0.2572	-0.145557	0.420691	0.494007	-0.0852637
ec_418	NDF6_HUMAN	0.180777	0.0977084	0.377007	-0.107633	-0.297841	0.189422	0.943406	0.395325	0.0941823	0.0613355	0.0321071	0.235108	-0.193204	0.225469	0.532261	-0.0225106
ec_418	NDF6_HUMAN	0.46074	0.107496	0.405787	-0.117335	-0.495259	0.153861	0.957251	0.222363	-0.116886	0.616167	0.207345	0.148402	-0.0253739	0.619896	0.941651	0.302297
ec_419	RBM42_HUMAN	0.248089	-0.027387	0.245078	-0.00443815	-0.406814	-0.123894	0.506248	-0.192683	-0.270087	0.0507295	-0.208824	-0.166363	-0.380534	0.245047	0.303554	-0.246091
ec_419	RBM42_HUMAN	0.32898	-0.115554	-0.0231075	0.00991939	-0.742777	-0.0827447	0.462699	0.0488563	-0.307672	-0.445506	-0.235997	-0.461536	-0.636605	0.0912066	0.476957	-0.296542
ec_420	URM1_HUMAN	0.365379	-0.0754896	0.0348803	0.151917	-0.52375	-0.221489	-0.343559	-0.353533	-0.202586	-0.367754	-0.194333	-0.610695	-0.378638	-0.0897449	0.0933897	-0.150302
ec_420	URM1_HUMAN	-0.0917887	-0.143547	-0.00390543	0.148928	-0.455641	-0.136039	-0.461688	-0.336807	-0.486288	-0.406427	-0.410164	-0.587529	-0.463713	0.0717799	-0.0631831	-0.127719
ec_421	BL1S5_HUMAN	0.0461107	-0.082066	-0.258798	0.125607	-0.546562	-0.223223	-0.278942	-0.259894	-0.112253	-0.0516373	-0.325318	-0.305843	-0.323111	-0.131537	-0.0911985	0.0761484
ec_421	BL1S5_HUMAN	-0.0714519	0.0458572	-0.219837	0.0914155	-0.647627	-0.264304	-0.183657	-0.247033	-0.0214588	-0.0777944	-0.275413	-0.292808	-0.374889	-0.0182061	-0.0161256	0.0662593
ec_422	DC1I2_HUMAN	0.30943	-0.0790883	0.181181	0.11783	-0.601257	-0.0322876	0.123363	-0.199171	-0.257095	-0.24715	-0.0618727	-0.137737	-0.0812322	-0.0346659	-0.107127	0.0557751
ec_422	DC1I2_HUMAN	0.0666869	-0.101637	0.129782	0.0846749	-0.6001	-0.0264483	0.130446	0.120566	-0.13374	-0.0557113	-0.100259	0.0591838	-0.48805	0.237963	0.392141	0.135888
ec_423	MAGD4_HUMAN	0.144723	0.349486	0.35157	-0.0838337	-0.230422	0.225414	0.171456	-0.00137299	-0.0965113	-0.0649822	0.106522	0.247257	-0.0257151	0.189636	0.228752	0.290677
ec_423	MAGD4_HUMAN	0.158646	0.265087	0.165831	-0.109142	-0.258375	0.130669	0.267547	0.0731379	-0.0637972	0.0445424	0.0825752	0.329697	-0.133735	0.459539	0.354791	0.27393
ec_424	PCGF2_HUMAN	0.245034	-0.120106	0.0923656	0.00353999	-0.381718	-0.110078	-0.243603	-0.0970494	-0.137074	-0.237908	0.0296008	-0.433841	-0.278592	0.251034	0.130886	-0.193379
ec_424	PCGF2_HUMAN	0.375752	0.0136592	0.204288	0.02864	-0.398168	0.000859827	-0.1066	-0.0889519	-0.242355	-0.214374	0.0857292	-0.180571	-0.30001	-0.0859513	0.356677	-0.163156
ec_425	CP058_HUMAN	0.328215	0.0819126	0.0460846	-0.143025	-0.256581	-0.0811818	-0.0219683	-0.0368121	0.0519098	0.0158464	-0.0880954	-0.171538	-0.127753	0.0124734	0.0857553	-0.175856
ec_425	CP058_HUMAN	0.712963	-0.057764	0.132393	-0.0725237	-0.338845	0.0946511	0.0584004	-0.0342828	-0.142765	-0.0238864	-0.0351609	-0.17409	-0.246598	0.0409479	0.400328	-0.220155
ec_426	C1QC_HUMAN	0.0713707	0.126665	0.25169	-0.123148	-0.178369	0.366405	0.446765	0.102234	-0.0604412	0.511405	0.199402	0.620854	-0.190971	0.693791	0.309486	0.0151121
ec_426	C1QC_HUMAN	0.131594	0.0418253	0.219122	-0.170277	-0.221064	0.388765	0.521811	0.372915	-0.0023908	0.445811	0.250335	0.722374	-0.183183	0.754824	0.489247	-0.00454324
ec_427	MMP3_HUMAN	-0.204779	-0.0460417	0.142201	-0.0264634	-0.121988	0.213892	0.00634347	0.0712036	-0.181541	0.0547665	0.192216	0.242691	-0.201395	0.445396	0.171993	0.0381175
ec_427	MMP3_HUMAN	-0.163835	-0.0523253	0.176369	-0.024005	-0.221935	0.186465	0.1264	0.136455	-0.203986	0.0999463	0.076497	0.367347	-0.282451	0.440117	0.338326	-0.0799623
ec_428	CP4B1_HUMAN	0.37399	0.0788552	0.13625	0.356683	-0.258426	0.191499	0.443524	0.0858174	0.152999	0.520214	-0.220565	0.405232	-0.325175	0.342029	0.355696	0.0017361
ec_428	CP4B1_HUMAN	-0.00581195	0.132388	0.189499	0.419044	-0.123668	0.235852	0.419572	0.349689	0.112295	0.487157	-0.0357916	0.451995	-0.357859	0.473831	0.41677	0.064028
ec_429	IBP3_HUMAN	0.345921	0.049094	0.0100044	0.132602	-0.0911814	-0.0896341	0.533155	-0.115761	0.354293	0.197408	-0.0851967	-0.147863	0.10974	0.216436	0.708242	-0.18062
ec_429	IBP3_HUMAN	0.0335725	-0.0406302	0.442228	0.189193	-0.219765	-0.0659184	0.526902	-0.0298184	0.189777	0.29084	-0.180271	-0.15348	-0.105398	0.274408	0.847302	-0.198729
ec_430	TNR6_HUMAN	0.145726	-0.0295752	0.121592	-0.0956244	-0.34267	0.125683	0.334816	0.040379	0.0345559	0.201487	0.109877	0.105577	-0.0144169	0.425504	0.141381	-0.0994574
ec_430	TNR6_HUMAN	0.091224	0.057943	0.116877	-0.124927	-0.302221	0.0176049	0.449232	-0.139873	0.119848	0.282691	0.206464	0.0209355	-0.0730818	0.406288	0.310657	-0.116245
ec_431	S10A4_HUMAN	-0.0634915	-0.634365	0.63212	2.63069	-1.04984	2.05481	-0.875626	0.612348	-0.533738	0.190533	-0.254384	2.32962	-0.420358	-0.280455	1.11362	2.32289
ec_431	S10A4_HUMAN	-0.0848936	-0.559765	0.500212	2.60956	-1.18704	2.00602	-0.683249	0.555567	-0.40181	0.0121885	-0.323701	2.42881	-0.424025	-0.304071	3.94916	2.23681
ec_432	GRAN_HUMAN	0.330622	0.202952	0.435267	-0.142664	-0.317546	0.037537	0.322988	-0.0414993	-0.476012	0.0562225	-0.190705	-0.0342306	-0.144555	0.200048	0.251797	-0.0217942
ec_432	GRAN_HUMAN	0.0910029	0.0564154	0.108082	-0.0520895	-0.298919	0.0108444	0.111668	0.00475496	-0.416442	-0.324298	-0.112852	-0.158297	-0.399396	0.290965	0.0871786	-0.0201252
ec_433	GBP1_HUMAN	0.553686	0.339404	0.10366	-0.174055	-0.15877	0.161535	0.452127	0.0944491	-0.0201484	0.449762	0.102095	0.250372	-0.164151	0.384252	0.321195	0.00532826
ec_433	GBP1_HUMAN	0.272808	0.309697	0.291348	-0.16962	-0.247704	0.210216	0.820487	0.22387	0.146544	0.433273	0.169443	0.415144	-0.0987948	0.524229	0.453199	-0.0474434
ec_434	IFI27_HUMAN	0.989285	-0.301212	-0.06696	0.138088	-0.553771	-0.527515	-0.437111	-0.327409	-0.0487524	-0.426394	-0.323568	-0.799605	-0.413675	-0.103131	0.20597	-0.311039
ec_434	IFI27_HUMAN	0.962185	-0.134665	0.293879	0.21594	-0.684808	-0.365203	-0.557971	-0.329643	-0.211663	-0.281827	-0.397751	-0.871706	-0.536244	-0.242267	0.788992	-0.2535
ec_435	KSYK_HUMAN	0.166293	-0.261541	-0.0380056	0.0646594	-0.257963	-0.165845	-0.497174	-0.264754	-0.0712853	-0.325809	-0.0351314	-0.509952	-0.379268	0.209625	0.00346303	-0.087186
ec_435	KSYK_HUMAN	0.561502	-0.189461	0.00712683	0.0197473	-0.459788	-0.181063	-0.441428	-0.163416	-0.320487	-0.366339	-0.260156	-0.701964	-0.441069	0.144757	0.165595	-0.274167
ec_436	GATA4_HUMAN	0.190351	-0.382791	0.0741328	0.264416	-0.394742	-0.0380123	-0.321649	-0.178584	-0.148668	-0.36523	0.0620372	-0.270701	-0.338175	0.3572	0.201553	-0.167818
ec_436	GATA4_HUMAN	0.11072	-0.382949	0.0957134	0.288207	-0.426809	0.0667645	-0.204163	-0.20475	-0.278721	-0.429328	-0.138213	-0.194354	-0.367365	0.453156	0.340965	-0.11358
ec_437	PLGF_HUMAN	0.472752	0.123918	0.117313	0.079112	-0.322829	0.0556763	0.126156	-0.123333	-0.0842593	-0.21347	-0.00141786	-0.255808	-0.132625	0.247901	0.235972	0.0795749
ec_437	PLGF_HUMAN	0.376906	0.0881289	0.154289	0.0548238	-0.466916	0.147423	0.350208	-0.0545058	-0.0397983	0.183098	0.0734726	-0.147964	-0.288836	0.491834	0.422395	0.221697
ec_438	TNF10_HUMAN	0.622144	0.334861	0.273308	0.000151069	-0.0806869	0.253102	0.226504	0.181736	0.182186	0.209476	0.113247	0.39273	-0.0159046	0.53066	0.482213	0.397082
ec_438	TNF10_HUMAN	0.280373	0.275782	0.170233	-0.0474814	-0.32188	0.264039	0.244778	0.206583	0.240105	0.489862	0.125199	0.566759	-0.142057	0.44114	0.641538	0.514674
ec_439	DAB2_HUMAN	0.212422	-0.285676	0.0452266	0.47301	-0.405858	-0.0304763	-0.363781	-0.163086	-0.135315	-0.382903	0.136064	0.0548691	-0.30699	0.256071	0.300496	0.259646
ec_439	DAB2_HUMAN	0.196634	-0.323669	0.0905131	0.373837	-0.423168	-0.00526279	-0.172205	-0.134568	-0.12338	-0.386053	-0.0299255	-0.0797778	-0.386497	0.298824	0.316442	0.031188
ec_440	ERBB2_HUMAN	-0.0289991	-0.0110022	0.118869	-0.324772	-0.0741262	0.227561	0.678357	0.233295	-0.054695	0.176347	0.117838	0.705673	-0.17679	0.350734	-0.0197942	-0.184483
ec_440	ERBB2_HUMAN	-0.0267946	0.124371	0.219782	-0.282665	-0.139781	0.194527	0.412283	0.251168	-0.0897145	0.286615	0.189022	0.795914	-0.132011	0.476805	0.0888299	-0.0766347
ec_441	GRB10_HUMAN	0.312797	0.0217649	0.105961	-0.0830049	-0.2665	-0.0999682	-0.0302069	-0.106181	0.0150966	-0.259153	0.0112544	-0.0986864	-0.0988639	-0.019253	0.0741126	-0.18625
ec_441	GRB10_HUMAN	0.851982	-0.0219481	0.196906	-0.067038	-0.386276	-0.049945	0.166054	-0.0796155	-0.205572	-0.0980737	0.0487983	-0.0951778	-0.267296	0.00994397	0.267034	-0.242124
ec_442	GDN_HUMAN	0.0373115	-0.230861	-0.0590183	0.0410433	-0.369091	-0.153696	-0.0538488	-0.117713	-0.163684	-0.294576	-0.10079	-0.280201	-0.21484	-0.106365	0.0210405	-0.274473
ec_442	GDN_HUMAN	0.130013	-0.191705	-0.0665481	0.0223465	-0.45367	-0.184662	0.0987682	-0.106502	-0.0531769	-0.158094	-0.165722	-0.243506	-0.256791	-0.126195	0.161715	-0.249395
ec_443	IGHA1_HUMAN	0.271042	0.0141661	0.0638659	0.105476	-0.319838	-0.099266	-0.125369	-0.284003	-0.169278	-0.268765	0.00175104	-0.366069	-0.241682	0.0105328	0.0257162	-0.16614
ec_443	IGHA1_HUMAN	0.0524054	-0.135718	-0.00863904	0.0651116	-0.383656	-0.217789	-0.199881	-0.205434	-0.111829	-0.337958	-0.080318	-0.421308	-0.337361	0.0526788	0.178892	-0.259418
ec_444	TMPS4_HUMAN	0.267127	-0.039604	0.086066	-0.177135	-0.0477151	0.0203351	-0.136939	0.0815132	0.153637	0.0955302	0.169992	0.208149	0.0145021	0.336009	0.223912	-0.0911741
ec_444	TMPS4_HUMAN	0.0996562	0.208604	0.502771	-0.182596	0.0725282	0.156726	0.937097	0.144092	0.229598	0.350593	0.285219	0.363899	-0.0085602	0.490844	0.168743	-0.0254639
ec_445	VGFR1_HUMAN	0.432573	-0.302114	-0.0403466	0.180944	-0.40453	-0.220083	-0.602498	-0.200854	0.0146734	-0.38733	-0.215639	-0.694345	-0.302272	0.0969403	0.146669	-0.00508237
ec_445	VGFR1_HUMAN	0.0947312	-0.313768	-0.00825532	0.21418	-0.487473	-0.11904	-0.464752	-0.0894109	-0.190673	-0.465226	0.024563	-0.807461	-0.558731	0.212609	0.288407	-0.0776011
ec_446	MED27_HUMAN	0.250942	-0.287211	-0.0870129	0.360075	-0.454644	-0.262	-0.307076	-0.16793	-0.156533	-0.452132	-0.124723	-0.465181	-0.444777	0.0946762	0.107184	0.312103
ec_446	MED27_HUMAN	-0.0056363	-0.234261	-0.0325487	0.357575	-0.583635	-0.182617	-0.525304	-0.156504	-0.343275	-0.462512	-0.126941	-0.349978	-0.58169	0.146842	0.272536	0.361797
ec_447	S10A8_HUMAN	0.299181	-0.291403	-0.0773371	0.247657	-0.473244	-0.392612	-0.55773	-0.353595	0.0254194	-0.274569	-0.343535	-0.72146	-0.28907	-0.685952	-0.0221696	-0.395205
ec_447	S10A8_HUMAN	-0.0157336	-0.462073	-0.151275	0.206419	-0.651656	-0.401569	-0.25986	-0.376867	-0.0843334	-0.332573	-0.50473	-0.725719	-0.542625	-0.660383	0.403585	-0.427348
ec_448	RIN1_HUMAN	0.317183	0.615697	0.16416	-0.314359	0.0109695	0.12206	0.497531	0.10478	0.126988	0.405679	0.0427039	0.307774	0.0237746	0.0528679	0.267971	-0.141224
ec_448	RIN1_HUMAN	0.657572	0.525384	0.675656	-0.296946	-0.0588972	0.108582	0.785738	0.129717	0.319599	0.364798	0.198411	0.253915	-0.171358	0.193877	0.444486	-0.0196508
ec_449	ISOC1_HUMAN	0.674634	-0.4178	-0.0748183	0.00968235	-0.457701	-0.145943	-0.299255	-0.239482	0.0101009	-0.277124	-0.11113	-0.588716	-0.333618	-0.0375301	0.14695	-0.303376
ec_449	ISOC1_HUMAN	0.375369	-0.212623	0.0010958	0.0325942	-0.570606	-0.143	-0.252506	-0.20525	-0.11072	-0.29824	-0.285829	-0.547622	-0.390238	0.124592	0.248757	-0.158496
ec_450	MMP2_HUMAN	0.458342	0.164378	0.390451	-0.217791	-0.0832437	0.152394	1.15367	-0.0691584	0.208755	-0.259798	0.20201	0.0752026	-0.0148165	0.256599	0.2155	-0.0444294
ec_450	MMP2_HUMAN	0.48279	0.202059	0.623444	-0.212017	-0.328558	0.167755	1.38679	0.213854	0.187094	0.613133	0.428469	0.532725	-0.221704	0.72307	1.12465	0.0372207
ec_451	S10A7_HUMAN	0.125049	0.240989	0.0566082	-0.223018	0.087184	0.00700252	-0.0731366	-0.0801556	-0.0552069	0.111748	0.0536297	0.105268	0.019401	0.459394	-0.0139751	-0.053671
ec_451	S10A7_HUMAN	0.217469	-0.0780231	0.117335	-0.223011	-0.130973	0.116586	0.936549	0.124652	-0.140478	0.260358	0.0198527	0.03194	-0.0455944	0.459779	0.306497	-0.0344399
ec_452	MPZL2_HUMAN	0.501547	0.236128	0.0853592	-0.269114	-0.134771	0.135756	0.452976	0.0603465	0.562782	0.119986	0.0395833	0.119496	-0.0772942	0.093134	-0.0254035	0.169836
ec_452	MPZL2_HUMAN	0.121848	0.205023	0.166855	-0.25264	-0.115592	0.174858	0.918827	0.217639	0.100949	0.243399	0.0240354	0.254206	-0.0866004	0.398611	0.117429	0.193545
ec_453	NUB1_HUMAN	-0.0873512	0.128158	0.179546	-0.0942363	0.00808681	0.307846	0.357988	0.183802	0.0198957	0.320839	0.169477	0.667648	-0.0419092	0.384048	0.195695	0.302575
ec_453	NUB1_HUMAN	0.112607	0.357151	0.225603	-0.106382	-0.0281094	0.406559	0.569141	0.266905	-0.110318	0.517007	0.153898	0.744227	-0.0836431	0.463792	0.335842	0.42619
ec_454	SRC8_HUMAN	0.212111	0.109209	0.30613	-0.0393198	0.0790665	0.372341	0.72321	-0.0194511	0.273418	-0.0734585	0.523009	-0.122464	0.465335	0.257248	0.389371	-0.244813
ec_454	SRC8_HUMAN	0.285319	0.167934	0.183809	-0.0619232	0.0383738	0.429	0.630489	-0.0315091	0.311466	-0.0622462	0.364044	-0.164882	0.544958	0.277995	0.603109	-0.129203
ec_455	UN93B_HUMAN	0.129184	0.0866819	0.242088	-0.18149	-0.10013	0.124426	0.384048	0.033801	0.0668868	0.095685	0.335055	0.265983	0.0325529	0.367838	0.1793	0.166672
ec_455	UN93B_HUMAN	0.00722707	0.142083	0.175703	-0.212335	-0.14794	0.0741452	0.271815	0.0929335	0.026416	0.0815516	0.134934	0.14886	0.0217759	0.265023	0.259933	0.0868793
ec_456	IFM1_HUMAN	0.119259	-0.145125	0.0591204	-0.104244	-0.265544	-0.0962211	-0.0914066	-0.0749745	-0.107122	-0.190516	0.241734	-0.217817	-0.17113	0.39179	0.0983393	-0.101729
ec_456	IFM1_HUMAN	0.283264	-0.0139991	0.148408	-0.0790394	-0.299356	-0.0713241	0.140293	-0.0544421	-0.0533042	-0.179906	0.1659	0.133352	-0.124318	0.25953	0.291162	-0.0974289
ec_457	MMP11_HUMAN	0.651409	-0.379251	-0.176248	0.321515	-0.530268	-0.513441	-0.810388	-0.439278	-0.135189	-0.477911	-0.3446	-0.989022	-0.388228	-0.163529	-0.0165923	-0.412749
ec_457	MMP11_HUMAN	0.866354	-0.286112	-0.164173	0.347054	-0.693253	-0.476566	-0.953035	-0.402301	-0.335094	-0.646865	-0.373231	-1.04691	-0.548373	-0.211618	0.12758	-0.491137
ec_458	THOC1_HUMAN	0.296192	-0.138092	-0.342817	-0.0093669	-0.175173	-0.200012	-0.20547	-0.308334	0.305049	-0.0455263	-0.117088	-0.535631	-0.164583	-0.25639	0.0986492	-0.237825
ec_458	THOC1_HUMAN	0.513161	-0.150447	0.0466757	-0.0289455	-0.209416	-0.182112	-0.351859	-0.21432	0.320268	-0.121457	-0.167668	-0.650377	-0.295207	-0.177929	0.786995	-0.323985
ec_459	PTCA_HUMAN	0.0713163	-0.197888	0.141401	-0.0266003	-0.153	-0.0154426	-0.00920304	-0.0274262	0.0153105	-0.107987	0.273161	-0.15346	-0.104129	0.312762	0.154088	0.150373
ec_459	PTCA_HUMAN	0.324937	-0.07672	0.190522	-0.102489	-0.252068	-0.0363044	0.146011	0.0517119	0.0763416	-0.0636098	0.058189	0.0457675	-0.194021	0.199891	0.31247	-0.0815654
ec_460	MMP11_HUMAN	0.339479	-0.234889	-0.0502844	-0.121095	-0.111792	-0.0702986	0.0163516	-0.0322517	-0.00954771	-0.125784	-0.0795897	-0.169232	-0.131687	0.0841761	0.345295	-0.162193
ec_460	MMP11_HUMAN	0.0261525	0.0421908	0.444171	-0.123792	0.00063248	0.00340732	0.727837	0.165822	0.0759176	0.141551	0.0629563	0.0926065	-0.231638	0.263622	0.327378	-0.198756
ec_461	PRDM1_HUMAN	0.237991	-0.121514	0.00519484	-0.052299	-0.451722	-0.261037	-0.166798	-0.101341	0.0503599	-0.22596	-0.084936	-0.526982	-0.238985	0.0194304	0.167593	-0.118695
ec_461	PRDM1_HUMAN	-0.119324	-0.160005	0.0200738	0.00256763	-0.384421	-0.109269	-0.299603	-0.114335	-0.249999	-0.327142	0.0655407	-0.502203	-0.361164	0.241229	0.205791	-0.119672
ec_462	BUB1_HUMAN	0.752644	0.104817	-0.209579	0.104896	0.0116927	-0.120968	-1.02309	0.20208	-0.0751495	0.10348	-0.452631	0.11013	-0.153628	-0.283431	-0.342956	-0.440458
ec_462	BUB1_HUMAN	0.576717	-0.0320605	-0.127312	0.086087	-0.0461271	-0.227366	-1.40482	0.629791	-0.109268	0.421869	-0.472238	0.101403	-0.0358662	-0.181239	0.0581649	-0.466129
ec_463	TOP2A_HUMAN	0.222502	0.0478272	0.00921714	0.294769	-0.166511	0.417308	-0.00895688	0.174774	0.0830696	0.149386	-0.347133	0.0450493	-0.570553	0.512595	-0.509276	0.309354
ec_463	TOP2A_HUMAN	0.311893	-0.0244882	-0.0172899	0.114272	-0.269614	0.400191	0.230385	1.12119	0.0534721	0.324553	-0.2659	0.0466326	-0.695264	0.56493	-0.331441	0.285515
ec_464	Q14868_HUMAN	0.701991	-0.304647	-0.34988	0.264476	-0.66068	-0.542521	-1.19103	-0.474798	-0.403047	-0.463786	-0.614412	-1.02981	-0.574993	-0.441125	-0.189072	-0.521656
ec_464	Q14868_HUMAN	0.799693	-0.562547	-0.159174	0.353497	-0.693766	-0.578269	-1.25816	-0.430593	-0.529162	-0.703327	-0.746404	-1.31579	-0.973948	-0.497681	0.0376914	-0.425677
ec_465	MYBB_HUMAN	0.914539	0.862315	-0.365552	0.532247	0.442843	-2.01487	-1.02338	-0.358367	0.110741	-0.748136	1.02055	-0.531932	-0.189726	-3.15752	2.12399	-1.95559
ec_465	MYBB_HUMAN	0.934689	0.942412	-0.18947	0.699068	0.429325	-2.18098	-1.39015	-0.193411	0.421808	-0.8325	0.770581	-0.551871	-0.122692	-3.22118	2.06306	-1.59125
ec_466	NR4A1_HUMAN	0.657555	-0.329769	-0.274617	0.358838	-0.0642217	-0.414951	-0.571301	-0.167576	-0.0809462	-0.224331	-0.567611	-0.569579	-0.199424	-0.785638	0.115426	-0.493802
ec_466	NR4A1_HUMAN	0.629262	-0.226261	-0.179229	0.623204	-0.471592	-0.450917	-0.708977	-0.189929	-0.0514111	-0.284184	-0.802833	-0.514427	-0.377028	-0.739244	0.390543	-0.354738
ec_467	DMB_HUMAN	0.0171406	0.421125	0.0281936	-0.138623	-0.522043	-0.0710015	-0.0319006	0.422441	0.264131	0.0285987	-0.168843	-0.239966	0.0026852	0.107604	-0.0848994	-0.00480458
ec_467	DMB_HUMAN	0.132557	0.159961	-0.0296828	0.038011	-0.103355	-0.0245882	0.0699325	0.261791	0.100542	0.00975914	-0.142503	-0.104094	-0.0677719	0.040117	0.176814	0.260609
ec_468	CD72_HUMAN	0.392215	-0.0286829	-0.131425	-0.035167	-0.0604078	0.167837	-0.136055	-0.0786061	-0.125833	0.0112829	0.0890613	0.00314585	-0.0495839	0.178865	0.0834653	0.14255
ec_468	CD72_HUMAN	0.642184	0.190162	-0.101676	-0.00843107	-0.101441	0.28789	0.245084	0.0615005	0.0632244	-0.0193715	0.0525344	0.0559347	-0.162561	0.529353	0.297344	0.0617212
ec_469	CD2A2_HUMAN	-0.0113733	-0.0745678	-0.084639	-0.242423	-0.114614	0.152264	0.0687824	0.157108	0.160928	0.0940761	-0.0808685	0.214199	-0.113523	-0.0580831	0.0736585	2.2273
ec_469	CD2A2_HUMAN	0.0975506	-0.0938565	-0.129453	-0.274735	-0.331951	0.100618	0.283776	0.206887	0.116768	0.348993	-0.0889691	0.161691	-0.0759564	0.103136	0.12442	2.11744
ec_470	IRS2_HUMAN	0.0596193	-0.210418	-0.0647945	-0.275641	-0.0499208	0.058872	0.00454798	-0.115807	0.019418	0.0772829	0.0250572	0.0140026	-0.0564152	-0.0287086	0.0229522	-0.190955
ec_470	IRS2_HUMAN	0.226943	-0.138242	-0.113274	-0.351014	-0.206635	-0.0754381	0.188318	-0.139824	-0.0433676	0.143483	0.0467652	0.107926	0.0952608	0.0710148	0.0888667	0.0219346
ec_471	NEK2_HUMAN	0.529537	-0.0361233	0.24419	0.0244158	-0.107473	0.037653	-0.107875	0.0380373	-0.190747	-0.227219	0.138114	-0.124908	0.0427728	0.102263	0.19681	-0.181133
ec_471	NEK2_HUMAN	0.782793	-0.192137	0.131681	0.0159729	-0.23537	0.0372203	0.00708279	0.160704	-0.127607	-0.224248	0.0123729	-0.226653	0.0474131	-0.170156	0.293493	-0.0241935
ec_472	MPIP2_HUMAN	0.740301	-0.14594	0.542043	-0.490783	-2.00832	0.536046	0.457626	1.60629	-0.814633	-0.0237764	-0.0719502	0.246165	0.813318	0.160068	0.0575106	1.20391
ec_472	MPIP2_HUMAN	1.11817	0.0270941	0.573343	-0.483958	-2.176	0.510736	0.0585205	2.31569	-0.363127	-0.0154163	-0.0212815	0.205604	0.403113	0.220164	-0.220878	1.65389
ec_473	CP1B1_HUMAN	0.0776541	-0.0733628	-0.0560147	0.0368404	-0.233136	-0.089945	0.308234	-0.0934795	-0.148803	-0.0616177	-0.134265	-0.140254	-0.127977	0.0188186	0.00861856	-0.135916
ec_473	CP1B1_HUMAN	0.182505	-0.0690245	-0.0745725	0.0584711	-0.275436	-0.116423	0.102432	-0.0581453	0.0730039	-0.0666248	-0.116772	-0.109598	-0.164752	0.106788	0.0802052	-0.0812052
ec_474	AURKB_HUMAN	-0.0119935	-0.162993	-0.0648555	0.0813141	-0.194094	-0.0477819	-0.160603	-0.318822	-0.129114	-0.0100872	-0.085858	-0.159234	-0.0653869	0.0748363	0.0193468	-0.166535
ec_474	AURKB_HUMAN	0.0395738	-0.195055	-0.117154	0.0688664	-0.298843	-0.140921	-0.043903	0.117505	0.0121263	-0.0141803	-0.054473	-0.172924	-0.116752	0.0358739	0.109762	-0.105099
ec_475	HMMR_HUMAN	-0.102575	-0.763915	-0.0442992	-0.012555	-0.110073	0.0994592	-0.172281	0.0897602	0.0661916	-0.02073	-0.160413	-0.0840439	-0.0875103	-0.0292441	-2.26148	-0.266823
ec_475	HMMR_HUMAN	0.145078	-0.866559	-0.162006	-0.0496354	-0.258504	0.0460606	0.148636	0.522828	0.0415559	0.0461495	-0.114092	-0.117952	-0.112791	0.0981955	-1.53648	-0.121031
ec_476	DCOR_HUMAN	0.253353	-0.115339	0.127519	0.214033	-0.115625	0.212987	0.313978	0.188548	0.0939511	-0.0935052	0.0904901	0.0316058	-0.00959443	0.167302	0.254594	0.0327459
ec_476	DCOR_HUMAN	0.211733	0.0796911	0.126608	0.374572	0.0849058	0.0297585	0.32583	0.326894	0.111041	0.0167173	0.085599	0.12408	-0.0454595	0.240048	0.281523	0.00169977
ec_477	RIR2_HUMAN	0.549048	-0.502073	-0.592676	0.454869	0.0557113	0.0677648	-1.12653	0.489618	0.733371	0.042585	-0.334184	0.150619	0.519377	1.17893	-1.14648	0.123764
ec_477	RIR2_HUMAN	0.287869	-0.807375	-0.510448	0.666215	0.113891	-0.0905769	-1.08493	0.0980714	0.755286	-0.0673078	-0.296019	0.0592287	0.45297	0.927032	-1.33442	0.107509
ec_478	HMGN2_HUMAN	0.247816	-0.0324816	0.735363	-0.216795	0.390305	0.663675	0.79484	1.77706	0.0102934	0.314388	0.149627	0.168942	0.022438	0.265858	0.387979	-0.0687575
ec_478	HMGN2_HUMAN	0.377326	-0.00454961	0.723517	-0.178366	-0.207445	0.507553	0.628916	2.05596	0.0324898	0.143456	0.15099	0.11994	0.0268152	0.301957	0.706312	-0.0663672
ec_479	CDK1_HUMAN	-0.643002	0.135883	0.242196	-0.186068	-0.911526	0.0955264	-0.00886853	1.58277	-0.282054	0.927347	-0.596912	0.0587526	-0.149236	0.192911	0.130311	-0.0199709
ec_479	CDK1_HUMAN	-0.763514	0.101726	0.0918743	-0.252001	-1.03407	0.081447	0.081004	2.30652	-0.369201	0.915615	-1.02272	-0.000337454	-0.06911	0.180121	0.295715	1.3794
ec_480	CHL1_HUMAN	-0.963142	0.000226838	-0.270361	-2.67861	-0.21405	-0.139069	0.870979	5.12872	-0.727992	-0.253244	-1.04056	0.923349	0.174075	-1.32207	-2.56777	-1.50761
ec_480	CHL1_HUMAN	-0.598941	0.366871	0.119882	-2.61673	-0.284121	-0.0420578	0.989523	6.02276	-0.510987	-0.735823	-1.40028	1.12902	0.0446939	-1.29982	-2.1263	-1.30817
ec_481	CCNB1_HUMAN	0.532627	0.545532	0.243866	-0.0511672	0.0851887	0.307054	0.526618	0.175013	-0.115029	0.261717	0.0267162	0.102307	-0.172369	0.366719	0.391747	-0.0131332
ec_481	CCNB1_HUMAN	0.814808	0.538199	0.506559	-0.0207015	-0.33512	0.459119	1.00732	-0.117548	0.0288306	0.17782	0.253239	0.18825	-0.0361117	0.843876	0.758047	0.737549
ec_482	KIF23_HUMAN	0.502268	0.186701	0.0391621	0.166441	-0.0890148	-0.0378991	0.156842	0.129349	0.156597	-0.0949973	-0.0546177	-0.135741	0.00119283	0.206486	0.239412	-0.0348013
ec_482	KIF23_HUMAN	0.448961	0.274155	0.209164	0.384009	-0.351932	-0.107214	0.0625805	0.102147	0.0292622	-0.014276	-0.0716677	-0.115293	-0.0474473	0.128092	0.317807	0.393124
ec_483	PIR_HUMAN	0.205552	-0.156338	-0.0116812	-0.175653	0.293617	0.362252	-0.397097	-0.118899	-0.352862	-0.264315	-1.08891	-0.0858736	-0.406161	-0.242935	0.788882	-0.281311
ec_483	PIR_HUMAN	0.487413	-0.0517724	-0.0436555	-0.190572	0.202915	0.278364	-0.512504	0.230736	-0.246491	-0.278403	-1.04919	-0.158468	-0.42191	-0.148887	1.58653	0.0762996
ec_484	KPCG_HUMAN	-2.64801	0.197232	0.303978	-0.00048005	0.0243958	0.124536	-0.381108	3.77288	-1.30895	0.0966548	-0.0101024	0.222453	-0.131818	0.490021	-0.15576	0.142458
ec_484	KPCG_HUMAN	-2.14805	0.147209	0.40872	0.0196458	0.077475	0.237738	0.0103127	3.97234	-1.20991	0.10648	-0.10787	0.356613	-0.176626	0.512858	-0.0725029	0.0771126
ec_485	PDCD2_HUMAN	-0.258269	0.181525	0.106583	1.28989	0.988753	-0.318618	-0.797207	-0.325125	1.27494	0.31317	-0.127401	-1.17821	0.488299	-0.818503	-0.378693	-0.663646
ec_485	PDCD2_HUMAN	-0.173637	0.148415	0.088544	1.27307	1.12176	-0.326825	-0.683083	-0.198929	1.58868	0.44196	-0.33287	-1.09592	0.385626	-0.752028	-0.037212	-0.766186
ec_486	IL2RB_HUMAN	-0.0779132	-0.188685	-0.298653	0.194527	0.201594	-0.128811	-0.856772	-0.169857	-0.0248479	-0.319793	-0.10031	-0.209071	0.147515	0.136655	-0.647186	0.1545
ec_486	IL2RB_HUMAN	-0.0950507	-0.134527	-0.287043	0.160084	0.187907	-0.126844	-0.706941	-0.0257097	-0.119961	-0.24514	-0.234897	-0.22965	0.129937	0.0334748	-0.514041	0.0960765
ec_487	CDC20_HUMAN	0.411494	0.297941	0.378951	0.034383	0.333154	0.115951	-0.724981	0.0912289	0.0546802	-0.0658334	-0.059404	-0.0284485	0.173697	-0.458513	-0.0990823	0.483983
ec_487	CDC20_HUMAN	0.280129	0.194734	0.0806875	-0.0642094	0.058058	0.0629124	-0.723814	0.519251	0.000606215	0.177575	-0.184153	-0.0278397	0.210774	-0.248912	0.06367	0.402704
ec_488	CKS2_HUMAN	1.9148	-1.06814	0.857517	1.33819	2.63257	0.0778321	2.02885	0.371517	-1.18233	-1.21316	1.465	0.382723	-0.138231	-1.88396	2.43162	-1.428
ec_488	CKS2_HUMAN	1.97091	-1.15518	0.927559	1.51527	2.70747	0.127994	2.16476	0.135022	-1.18928	-1.21957	1.35449	0.404401	-0.0858846	-1.90061	2.88792	-1.53672
ec_489	CDKN3_HUMAN	-0.115845	-0.292893	-0.254341	0.0240676	-0.0376814	-0.0375614	-0.499491	-0.0521712	-0.0440402	-0.00624825	-0.198705	-0.16154	0.0165778	-0.0446389	-0.379274	-0.115406
ec_489	CDKN3_HUMAN	-0.10085	-0.209968	-0.24566	0.0426454	-0.169757	-0.0551393	-0.441457	0.375498	0.0325279	-0.118196	-0.136809	-0.0618346	-0.0852624	0.0519844	-0.156797	-0.0908777
ec_490	CP11A_HUMAN	0.127195	-0.214309	-0.0135539	0.458215	0.310248	-0.253089	-0.280062	-0.122473	0.304817	-0.397797	-0.0980141	-0.534955	0.228518	0.146434	-0.152941	-0.438228
ec_490	CP11A_HUMAN	0.434236	-0.224355	-0.0140613	0.418424	0.261758	-0.267101	-0.262412	-0.0886172	0.336181	-0.156364	-0.15311	-0.50144	0.234739	-0.0569649	-0.113104	-0.677634
ec_491	CENPF_HUMAN	-0.154893	-0.19402	0.191385	-0.0330734	0.287317	-0.0107993	0.185537	0.0533677	-0.0611714	-0.202922	-0.0513015	0.0359353	-0.162543	0.138416	-0.181528	-0.10558
ec_491	CENPF_HUMAN	-0.0717189	-0.174774	0.142873	-0.111143	0.114549	0.205138	-0.00603582	0.793711	-0.00650747	0.0232725	-0.116422	0.0417929	-0.171563	0.24755	-0.00185585	-0.107021
ec_492	PLK1_HUMAN	0.1267	-0.120719	-0.0203231	0.00428063	-0.319943	-0.0644115	-0.140258	-0.00792578	-0.145039	-0.332757	0.185238	0.00319486	-0.19951	0.303512	0.00317659	0.44979
ec_492	PLK1_HUMAN	-0.0574492	-0.208398	0.0220804	0.0820468	-0.232157	-0.0229437	-0.0544184	-0.0341387	-0.251585	-0.331175	0.296383	0.461245	-0.253424	0.420946	0.182518	0.568041
ec_493	GRPR_HUMAN	-0.0570595	-0.292119	-0.277904	0.0691963	0.0336143	0.229145	-0.58649	-0.0258102	0.203597	0.0833215	-0.317546	-0.153927	0.109795	-0.0835098	-0.0707263	-0.174221
ec_493	GRPR_HUMAN	-0.168524	-0.237528	-0.256787	0.0842013	-0.0284115	-0.194003	-0.407178	0.139362	-0.0555705	0.172714	-0.355556	-0.0447546	0.0271844	-0.0698518	-0.0377989	-0.163593
ec_494	MD2L1_HUMAN	-0.224331	-0.189453	-0.142614	0.405331	0.159384	0.0429979	-0.584322	0.123509	-0.0392288	0.14764	-0.0559073	-0.145746	0.152894	-0.0580372	-0.268349	0.0125628
ec_494	MD2L1_HUMAN	0.0752049	-0.12318	-0.156228	0.476919	0.157471	-0.0169611	-0.263612	0.0804732	0.0499362	0.0211348	0.0357648	-0.115111	0.218962	-0.131594	-0.0683637	0.0972939
ec_495	HMGB2_HUMAN	-0.297366	-0.299436	-0.309881	-0.285504	0.0652485	-0.267121	-0.962504	0.0540022	-0.182686	-0.300824	-0.342412	-0.397295	-0.0383251	-0.0516626	-0.216837	0.109764
ec_495	HMGB2_HUMAN	-0.0527287	-0.266553	-0.164763	-0.342889	-0.0279478	-0.497485	-0.901062	0.103149	-0.261138	-0.311173	-0.429795	-0.36659	-0.0716226	-0.167043	-0.386174	0.272516
ec_496	UBE2B_HUMAN	0.0265655	-0.174071	-0.0198093	-0.243144	0.197158	-0.0343007	-0.264974	0.343449	-0.0596694	-0.300125	-0.39076	0.0550439	-0.15216	0.296209	-0.184779	0.167202
ec_496	UBE2B_HUMAN	-0.107553	-0.255522	0.105361	-0.150073	0.0444965	0.0879499	0.052951	0.481929	-0.258106	-0.27864	-0.0448516	0.178591	-0.138767	0.441995	-0.0597984	0.176343
ec_497	PRI1_HUMAN	-0.0390905	-0.13551	-0.218282	-0.0425661	0.404016	-0.0606569	-0.415784	0.0287254	-0.0488019	-0.0266688	-0.066039	-0.124715	0.246934	-0.119466	0.0190166	-0.135717
ec_497	PRI1_HUMAN	0.0841414	-0.0077531	0.00357822	-0.00791058	0.117389	-0.0618018	-0.122107	0.210443	0.242283	0.00538549	-0.0426915	-0.0267293	0.122065	-0.0579086	0.192405	-0.0188054
ec_498	RCC1_HUMAN	0.150261	0.0542235	0.177366	0.206041	0.454554	0.116124	-0.18166	0.587341	0.0785006	-0.21279	0.107894	-0.056911	0.255735	0.441369	0.097309	0.520135
ec_498	RCC1_HUMAN	0.271738	0.155789	0.180084	0.166866	0.432942	0.306937	0.149452	1.09929	0.0427011	-0.0829047	0.204686	0.0750467	0.187346	0.330919	0.193585	0.379882
ec_499	CD59_HUMAN	-0.190107	-0.200714	-0.205121	0.0624235	0.107484	-0.10111	-0.49609	-0.244379	-0.237468	-0.198942	-0.341729	-0.142606	-0.0445921	-0.127121	-0.27339	-0.0767269
ec_499	CD59_HUMAN	-0.0107773	-0.130225	-0.287939	0.0582187	0.017612	-0.08406	-0.400183	-0.111883	-0.229484	-0.0524226	-0.344373	-0.122468	-0.0325966	-0.128715	-0.338483	-0.0571999
ec_500	NEP_HUMAN	0.214482	0.181967	0.302086	0.049279	-0.140798	0.97763	0.380585	0.194966	-0.110809	0.266301	0.135762	1.08795	-0.0897136	0.942608	0.460452	0.390047
ec_500	NEP_HUMAN	0.222097	0.203774	0.392895	0.0664344	-0.136687	1.05642	0.888425	0.217713	-0.166122	0.247073	0.447575	1.16609	-0.138689	1.09738	0.522185	0.461608
ec_501	S1PR1_HUMAN	-0.0967357	0.12961	-0.106843	0.113445	0.235681	-0.0511509	-0.483631	0.0327483	-0.171793	-0.275805	-0.25591	0.0669425	0.214352	0.0530263	-0.339043	0.289244
ec_501	S1PR1_HUMAN	-0.192244	0.114276	-0.128021	0.0594851	0.252511	-0.0392114	-0.544482	0.0208679	-0.211726	-0.130891	-0.149821	0.0406902	0.185076	0.296178	-0.230865	0.280245
ec_502	CCNA2_HUMAN	0.471622	-0.08702	-0.158804	0.190373	-0.156087	-0.206389	-0.192334	-0.135376	0.114268	-0.427385	-0.0566866	-0.309009	-0.172329	-0.185281	0.209936	-0.229089
ec_502	CCNA2_HUMAN	0.340016	-0.264539	-0.14197	0.146594	-0.402792	-0.221045	-0.542785	0.139694	0.0351474	-0.198987	-0.223304	-0.318156	-0.257618	-0.120164	0.246941	-0.224056
ec_503	ETS2_HUMAN	0.427532	-0.0295998	-0.0969369	0.338104	0.242442	0.160615	-0.877336	-0.034872	0.0142993	-0.0568637	-0.13783	-0.461427	-0.0693424	-1.24689	0.350196	-0.101183
ec_503	ETS2_HUMAN	0.31786	-0.0374558	-0.242804	0.248136	0.279452	0.0993459	-0.958315	0.0502321	-0.0258399	-0.0434259	-0.22796	-0.352999	-0.00718648	-1.16642	0.317496	0.0234014
ec_504	IL32_HUMAN	0.293334	0.0976865	0.275951	0.0712628	-0.0379511	0.933188	0.296901	2.10531	-0.280261	0.159398	-0.00526455	0.179892	0.0205034	0.458338	0.166521	0.108949
ec_504	IL32_HUMAN	0.764267	0.344694	0.31498	0.12067	0.0397315	0.947358	0.349654	2.37412	0.0357886	0.125454	0.113416	0.251181	0.126185	0.717273	0.400194	0.10326
ec_505	BAK_HUMAN	0.231556	-0.185401	-0.0295538	0.120115	-0.147567	0.0368753	0.163498	-0.00828366	-0.117441	-0.295834	-0.0169369	-0.172604	0.0350542	-0.187949	-0.00971303	0.0435201
ec_505	BAK_HUMAN	0.454672	-0.137832	-0.0165321	0.168569	-0.184672	-0.089252	0.111072	0.303666	0.00941731	-0.146454	0.0251936	0.102176	-0.193555	-0.114968	0.377394	0.0158971
ec_506	CP3A5_HUMAN	0.798463	0.0652322	0.290307	-0.0239423	1.00414	-0.191421	-0.337963	-0.0774915	0.149726	-0.350425	0.424232	1.02974	0.401577	-0.509548	0.66902	-0.118121
ec_506	CP3A5_HUMAN	1.35161	0.154699	0.271138	-0.0462289	0.937461	-0.205833	-0.294953	0.200271	0.151284	-0.221293	0.429856	0.710209	0.378928	-0.313698	0.654678	0.0528547
ec_507	ENC1_HUMAN	-0.214696	-0.172261	-0.259999	0.1297	0.19077	-0.181502	-0.81598	-0.187023	-0.202355	-0.36884	-0.14131	-0.299582	0.105964	-0.103336	-0.373865	0.125958
ec_507	ENC1_HUMAN	0.30769	-0.130842	-0.231245	0.102476	0.14146	-0.13178	-0.775941	-0.134472	-0.199615	-0.351946	-0.127319	-0.340119	0.0766498	-0.036115	-0.220704	0.127047
ec_508	PO2F2_HUMAN	-0.0729475	-0.184126	-0.244101	0.10667	0.00725869	-0.15064	-0.401514	-0.12991	-0.00677805	-0.106759	-0.0393072	-0.100544	-0.034492	0.0609692	-0.072166	-0.0914426
ec_508	PO2F2_HUMAN	-0.112631	-0.0479297	-0.11478	0.216607	-0.0481581	-0.135982	0.131279	-0.106031	0.087313	-0.166376	-0.0843322	-0.185707	-0.127733	0.0387923	-0.00232651	-0.0425145
ec_509	ACTN1_HUMAN	-0.0295185	-0.0599283	-0.224963	-0.0317502	-0.125572	0.0819709	-0.0657051	0.14812	0.0954119	0.149427	-0.237013	-0.0411756	-0.0834149	0.0586691	0.0245205	-0.0401039
ec_509	ACTN1_HUMAN	-0.0272319	-0.0613555	-0.263	-0.035055	-0.216285	0.0815264	0.0408938	0.248885	-0.115092	0.121429	-0.266768	-0.00178057	-0.112707	0.0806827	0.171385	-0.00674746
ec_510	SHIP1_HUMAN	-0.049842	-0.134531	-0.0718247	0.0894039	0.089965	0.0548781	1.11289	0.0599186	0.0983073	-0.00488461	-0.0408384	-0.010852	0.0904241	0.0502357	0.0475282	-0.128662
ec_510	SHIP1_HUMAN	0.0611888	-0.218248	-0.227239	0.132471	-0.0229459	0.109676	0.255325	0.30322	-0.156743	0.0509327	0.089028	0.0379565	0.0341116	0.139236	0.190604	-0.0243866
ec_511	ID2_HUMAN	0.0684082	0.0166896	0.104831	0.0130935	0.0491997	0.262815	0.100636	-0.12194	0.153187	-0.00051235	0.0548212	0.0598697	0.0259285	0.0913645	0.175792	-0.0909018
ec_511	ID2_HUMAN	0.239408	-0.0223809	-0.0208507	-0.0411163	-0.0695105	0.214015	0.324794	0.34618	0.141251	0.183788	0.196958	0.0489997	-0.0303463	0.160101	0.397879	-0.036881
ec_512	FLNA_HUMAN	0.369968	-0.00955342	-0.333047	0.0696025	0.17461	-0.0604444	-0.695053	-0.0357925	-0.188662	-0.332359	0.420066	-0.333266	0.0593523	-0.166772	-0.174329	0.20776
ec_512	FLNA_HUMAN	-0.13482	-0.0773461	-0.257756	0.183953	0.137368	-0.126485	-0.552362	-0.161467	-0.258008	-0.396253	-0.136932	-0.240212	-0.105858	0.0279647	-0.289911	0.316707
ec_513	VIME_HUMAN	0.167365	0.240685	0.060647	0.134226	0.119659	0.0367438	0.083724	0.165526	0.0869665	0.0425253	0.00935051	-0.0567514	0.148738	0.0078429	0.1083	0.0253097
ec_513	VIME_HUMAN	0.19974	0.0489846	0.144164	0.158018	-0.017269	0.0529957	0.153851	0.410973	0.240422	0.108166	0.0921075	0.048593	0.0544165	0.194037	0.126183	0.0373437
ec_514	EDN1_HUMAN	0.122788	0.00417081	0.130307	0.0735558	0.0140356	0.0220658	0.0777335	0.0365878	0.023905	-0.0152906	0.0187531	-0.073775	0.119595	0.0300838	0.0102369	-0.03072
ec_514	EDN1_HUMAN	0.240269	0.0195833	0.10765	0.121255	-0.0489528	0.0122813	0.18722	0.334718	0.12693	0.165404	0.124377	0.0438551	0.0298859	0.233682	0.237265	0.226653
ec_515	MX2_HUMAN	0.205183	0.0940318	0.353818	0.019414	-0.0825388	0.286986	0.668078	0.233441	-0.0468623	0.190462	0.113129	0.182049	-0.0989942	0.507758	0.499642	0.0763293
ec_515	MX2_HUMAN	0.381609	0.0694303	0.23137	0.052794	-0.270197	0.532244	0.733338	0.420606	-0.0135474	0.22588	0.251981	0.185833	-0.0648692	0.488761	1.11599	0.0416181
ec_516	CDK4_HUMAN	0.10661	0.523792	0.176821	-0.127365	0.0875409	0.346556	0.377315	0.0524789	-0.0463784	0.0633051	0.0897132	0.3683	-0.136311	0.514976	0.174003	0.632326
ec_516	CDK4_HUMAN	0.0787957	0.527528	0.235129	-0.0874318	-0.0393298	0.755924	0.643316	0.0413897	-0.189674	0.0922069	0.0271071	0.430004	-0.191529	0.639195	0.28467	0.741987
ec_517	SG2A1_HUMAN	0.0304172	-0.432731	-0.151038	0.453042	-0.451177	-0.0544469	-0.537398	-0.217815	-0.187902	-0.449003	-0.0689514	-0.184072	-0.412011	0.12147	0.147414	0.331061
ec_517	SG2A1_HUMAN	0.125578	-0.420885	-0.119095	0.428692	-0.535708	-0.0982215	-0.499696	-0.256739	-0.282291	-0.535241	-0.11046	0.0845681	-0.505143	0.158022	0.356636	0.304172
ec_518	RL7A_HUMAN	0.220255	0.202089	0.171775	0.0816153	-0.237467	0.371928	0.185269	0.387695	-0.180635	-0.0152642	0.0460172	0.12516	-0.245471	0.353269	0.50375	0.409002
ec_518	RL7A_HUMAN	0.190717	0.324722	0.172686	0.0068512	-0.361517	0.261782	0.146841	2.14186	-0.0482427	0.0997428	0.102249	0.165684	-0.0519916	0.463378	0.777753	0.592405
ec_519	IL3RB_HUMAN	-0.605878	0.405839	0.442936	-0.0232636	-0.053945	0.367261	1.14859	0.138993	-0.0802139	0.0589168	0.0415478	0.534931	-0.0176097	0.0646075	-0.497532	0.509158
ec_519	IL3RB_HUMAN	-0.608893	0.45356	0.342466	-0.089676	-0.223771	0.42102	1.25218	0.161806	-0.0516237	0.315039	0.11175	0.479393	0.0589927	0.204543	-0.472805	0.564664
ec_520	FRAT1_HUMAN	0.0559468	0.111482	0.354737	0.585346	0.743479	0.284749	0.685814	-0.445639	0.683869	0.443094	0.087223	0.189058	0.32864	-0.283423	0.570957	-0.554318
ec_520	FRAT1_HUMAN	0.106779	0.106717	0.306966	0.69709	0.729793	0.201806	0.797182	-0.618105	0.653319	0.420285	0.13624	0.533211	0.289742	-0.171006	0.747317	-0.394105
ec_521	TR10B_HUMAN	0.141331	-0.139209	0.0675712	0.0862782	-0.205213	0.0864137	0.243609	0.075913	0.0341344	-0.296434	-0.0199183	-0.159086	-0.0756418	0.0478554	0.0149043	1.58237
ec_521	TR10B_HUMAN	0.188646	-0.141236	-0.0541561	0.167101	-0.321452	-0.0838983	-0.207782	0.55243	0.0341389	-0.075647	0.0541581	-0.0626201	-0.166788	0.134277	0.290372	1.28678
ec_522	BCAS1_HUMAN	0.0615086	0.207774	-0.153494	-1.13675	1.80879	0.567978	0.472824	-0.0605699	0.957041	-0.774716	1.84268	0.437424	2.49626	-0.998466	0.702863	-0.634147
ec_522	BCAS1_HUMAN	0.206506	0.19244	-0.194343	-1.07104	2.13279	0.619458	0.598015	-0.482243	1.20721	-0.789453	2.0464	-0.0791865	2.40817	-0.776791	0.96203	-0.639522
ec_523	ATTY_HUMAN	0.290606	-0.356453	-0.0932991	0.187621	-0.54867	-0.252903	-0.120672	-0.281272	-0.0215403	-0.424653	-0.227981	-0.416061	-0.339038	-0.508057	0.276404	-0.173922
ec_523	ATTY_HUMAN	0.458934	-0.448318	-0.057222	0.123591	-0.732464	-0.249427	-0.236301	-0.21292	-0.149766	-0.510076	-0.380377	-0.511548	-0.526513	-0.40173	0.296312	-0.318332
ec_524	MYCL2_HUMAN	-0.387684	-1.35825	-1.38996	1.91121	-2.67528	0.818253	-0.44812	0.325387	-1.65194	-0.690979	-1.13074	1.69079	-2.18789	-2.00271	3.22102	1.29206
ec_524	MYCL2_HUMAN	-0.370228	-1.13895	-1.31626	1.94534	-2.75376	0.829007	-0.441182	0.109748	-1.25057	-0.632592	-0.997568	1.74163	-1.95592	-1.84615	3.41885	1.32688
ec_525	CASPA_HUMAN	0.831177	-0.284287	0.841179	-0.153058	-0.0305062	1.20175	0.912785	4.47269	0.514132	0.582009	0.316938	0.774317	0.417813	0.741138	-0.393833	0.412668
ec_525	CASPA_HUMAN	0.497444	-0.396991	0.94045	-0.140295	-0.026097	1.32389	0.796205	4.90678	0.244187	0.610559	0.405519	0.860403	0.392236	0.908668	-0.134278	0.555578
ec_526	STK19_HUMAN	0.461321	-0.234163	0.362784	0.192219	-0.440687	-0.0810965	-0.295226	-0.235198	-0.0839115	-0.237074	-0.242218	-0.117356	-0.346634	0.123181	0.356059	-0.166286
ec_526	STK19_HUMAN	0.676256	-0.0958378	0.384141	0.201635	-0.645815	-0.188515	0.0975674	0.22485	-0.0934125	0.219778	-0.265005	-0.178949	-0.421862	0.397385	0.684367	-0.165392
ec_527	MRRP3_HUMAN	-0.139011	0.316009	0.469098	-0.125765	0.261446	2.10764	1.14955	0.329057	0.183051	0.351014	0.390512	0.650782	0.0286861	0.733487	0.153245	0.220888
ec_527	MRRP3_HUMAN	-0.044858	0.417436	0.449329	-0.125158	0.165673	0.653172	1.18199	0.402232	0.182872	0.427018	0.555359	0.673341	0.0431741	0.940733	0.45036	0.260647
ec_528	EIF3I_HUMAN	0.00495928	0.555335	0.302675	-0.135531	0.414081	0.196361	0.833449	-0.0619646	0.394077	0.526238	0.223106	0.60644	0.0907167	0.292054	0.150254	-0.481599
ec_528	EIF3I_HUMAN	0.181388	0.863359	0.504272	-0.0627234	0.684036	0.184253	0.984124	-0.183369	0.553299	0.507026	0.438729	0.480467	0.114578	0.0872177	0.302989	-0.563588
ec_529	MXI1_HUMAN	0.442548	0.585664	-0.103263	-0.0460965	-0.0306007	0.605468	0.843677	0.272196	-0.0459204	0.197335	0.147456	0.251092	-0.179056	0.722994	0.470662	0.131852
ec_529	MXI1_HUMAN	0.477904	0.188877	0.389364	0.0345734	-0.11552	0.670489	0.790889	1.2201	0.105988	0.328733	0.407956	0.459901	0.104553	0.665846	0.69847	0.106866
ec_530	CFLAR_HUMAN	0.307876	0.173468	0.517136	-0.213555	-0.126549	0.353926	1.54957	0.0541463	-0.0245295	0.217028	0.190371	0.333468	-0.0282109	0.579767	0.369122	-0.00610805
ec_530	CFLAR_HUMAN	0.429635	0.187986	0.575873	-0.0492687	-0.049205	0.476662	1.7219	0.0104658	-0.0120292	0.555357	0.315768	0.661577	-0.123026	0.849503	0.979383	0.378945
ec_531	AQP6_HUMAN	0.187757	0.502398	0.308191	-0.137046	0.415396	0.379658	0.861302	0.70493	0.12002	0.369942	0.279542	0.843784	0.138632	0.823707	0.306234	0.240858
ec_531	AQP6_HUMAN	0.409475	0.240039	0.489613	-0.150755	0.735672	1.11632	1.66501	0.226398	0.184098	0.79839	0.593004	1.06211	0.0432355	0.921852	0.756302	0.147033
ec_532	MALL_HUMAN	-0.0252831	0.204452	0.1938	-0.396524	0.255971	0.506553	1.03798	0.266662	0.385395	0.57404	0.430239	1.18976	-0.0501604	0.500897	0.277045	0.330488
ec_532	MALL_HUMAN	0.039232	0.21282	0.273429	-0.324743	0.282103	0.543987	1.27668	0.314939	0.350027	0.491713	0.188908	1.11589	0.0188962	0.738582	0.26248	0.411643
ec_533	SAHH2_HUMAN	-3.51128	-3.87272	-3.5471	-3.87795	-2.04444	-2.75256	-1.15367	-1.89189	-1.71324	-1.17973	-3.37329	-2.1571	-2.90292	-4.38461	-1.75373	-2.64639
ec_533	SAHH2_HUMAN	-3.26445	-3.91578	-3.48097	-3.69901	-1.42234	-2.66294	-1.03918	-1.19795	-1.69611	-1.2659	-3.58757	-2.34816	-2.61008	-4.57233	-1.6634	-2.48532
ec_534	SAMP_HUMAN	-3.63648	-4.36149	-4.15214	-3.3677	-4.40962	-2.89434	-4.12751	-4.50795	-3.11341	-3.02021	-3.73586	-1.92519	-3.46634	-3.88308	-1.41765	-2.3477
ec_534	SAMP_HUMAN	-3.86962	-4.43789	-4.27541	-3.58425	-4.92998	-2.91115	-3.87787	-4.77906	-3.08049	-3.04746	-3.79065	-2.04927	-3.22167	-3.51639	-1.39934	-2.31166
ec_535	ACTB_HUMAN	0.148614	0.48084	0.0656516	-0.0933036	0.587378	0.169794	0.401107	0.179186	0.771942	0.478163	0.0115798	0.159234	0.0820932	-0.0749849	-0.0524839	0.76173
ec_535	ACTB_HUMAN	0.219268	0.428445	0.000338079	-0.112424	0.665424	0.627352	0.336479	-0.0870954	1.01876	0.487237	-0.102642	0.0482683	0.139579	-0.218132	0.0393361	-0.0388515
ec_536	FABPL_HUMAN	0.459124	0.0210888	-0.271953	0.0877801	0.19969	-0.4279	-0.4714	0.580686	1.41252	0.206392	0.0569502	-1.15102	0.487405	-0.86829	-0.491311	-0.892845
ec_536	FABPL_HUMAN	0.534957	0.411911	-0.284099	0.0469729	1.27917	-0.320328	0.173499	0.423537	1.36587	0.172384	0.152201	-0.912841	0.465053	-1.43879	-0.313087	-0.888652
ec_537	MPP10_HUMAN	0.205497	-0.0147342	0.341964	-0.0901831	-0.239967	0.568297	0.559383	0.212093	-0.118308	0.395208	0.00298985	0.169957	-0.106336	0.291851	0.515871	-0.0961117
ec_537	MPP10_HUMAN	0.380412	-0.0273277	0.261505	-0.0525013	-0.377594	0.731634	0.899744	0.424332	0.0478835	0.249185	0.159186	0.298184	-0.091798	0.447011	0.62016	-0.0541483
ec_538	G6PT1_HUMAN	0.16971	-0.0530254	0.181436	0.451339	-0.074449	0.740621	0.240767	0.219832	0.244399	0.184576	-0.153182	0.068968	-0.0866949	0.283662	0.327708	-0.0995233
ec_538	G6PT1_HUMAN	0.249853	-0.0390028	0.160554	0.463156	-0.0336885	1.00334	0.52024	0.259126	0.0753305	0.333895	-0.0271237	0.130877	-0.120288	0.440043	0.525389	0.0296189
ec_539	PAX2_HUMAN	0.14116	0.458489	0.411485	-0.343241	0.435812	1.65313	1.06584	1.65609	0.0253743	0.231828	0.278704	0.720593	0.375258	0.616844	-0.341083	0.324402
ec_539	PAX2_HUMAN	0.349342	0.560339	0.397211	-0.308977	0.437981	1.66414	1.28544	3.10311	0.22329	0.493465	0.355913	0.909896	0.384735	0.740417	-0.113083	0.393192
ec_540	KCRB_HUMAN	2.31074	0.237059	0.533573	1.15738	-0.716093	-0.202966	0.766691	-1.43737	1.39181	-0.520431	0.708738	-0.640042	0.876499	-1.24785	1.87754	0.181234
ec_540	KCRB_HUMAN	2.01984	0.331505	0.589445	1.2303	-0.644361	0.657911	0.809607	-1.64082	1.15766	-0.531237	0.56949	-0.556023	0.852392	-1.12891	2.33883	0.10337
ec_541	RL18_HUMAN	0.00873178	-0.173	-0.24997	-0.706497	0.0181875	-0.125511	0.520523	1.99997	0.307108	0.258595	-0.393081	-0.613991	0.0893665	-0.435861	-0.970861	-0.502755
ec_541	RL18_HUMAN	-0.0953007	-0.268964	-0.256633	-0.638518	-0.221161	-0.106789	0.212611	1.92665	0.210087	0.342197	-0.182556	-0.57946	-0.014625	-0.642988	-0.861658	-0.967774
ec_542	RL18A_HUMAN	-0.202487	0.00331835	-0.087136	-0.101386	0.231319	-0.463782	-0.236152	0.492158	0.812284	0.372271	-0.31316	-0.909711	0.0919048	-0.868189	-1.10457	-0.738099
ec_542	RL18A_HUMAN	-0.203224	0.0692299	-0.0925348	-0.108387	0.266993	-0.315056	-0.195929	0.594095	1.13049	0.316051	-0.234825	-1.18823	0.0326744	-1.02393	-1.05808	-1.18547
ec_543	CD81_HUMAN	-0.244677	0.160087	0.0250487	-0.0340725	1.40313	0.373509	0.0947616	0.783606	1.24994	0.0100674	0.0345922	-0.756725	-0.162567	-0.791813	-0.601986	-0.598313
ec_543	CD81_HUMAN	-0.128453	0.209633	-0.110079	-0.000407405	1.46216	0.414411	0.165637	0.130232	1.48589	-0.0198416	-0.0164	-0.597351	0.402752	-1.16928	-0.818235	-0.614515
ec_544	RL29_HUMAN	0.053758	0.161199	-0.25055	-0.27489	1.45242	0.272139	0.350303	0.00126564	1.32093	-0.185322	0.0423107	-0.427227	0.37611	-1.15499	-0.147912	-1.34271
ec_544	RL29_HUMAN	0.0780452	0.256046	-0.201748	-0.0761995	1.3777	0.429745	0.645021	0.366211	1.24974	-0.235324	0.0582631	0.0326297	0.480462	-1.01825	-0.0438525	-0.531993
ec_545	RL6_HUMAN	0.850723	0.777627	-0.180089	0.131807	0.208297	1.98439	2.09912	5.15347	0.914715	0.888084	0.769514	0.77953	0.456998	1.10288	0.37683	0.904907
ec_545	RL6_HUMAN	0.854727	1.22273	1.85273	0.250485	0.229616	2.25344	2.3176	4.90897	0.976486	0.91473	0.876612	0.977127	0.670703	1.40169	0.475886	1.28321
ec_546	IMDH1_HUMAN	0.556914	0.693453	1.55182	0.213054	0.127015	2.05749	1.82299	5.39078	0.956259	0.698932	0.88991	0.859391	0.618697	0.851152	0.419048	0.771735
ec_546	IMDH1_HUMAN	0.807023	1.04386	1.69545	0.301034	0.0887939	2.16343	2.25446	5.44714	0.914917	1.00101	0.885502	1.03326	0.700372	1.39854	0.43762	1.16708
ec_547	IRF7_HUMAN	-0.0209538	0.382513	0.204351	0.41897	0.0144313	0.645549	0.787389	-0.466753	0.650672	0.368977	-0.126137	0.615834	0.0833553	0.170896	0.578179	-0.199911
ec_547	IRF7_HUMAN	0.0790866	0.450564	0.245565	0.466943	0.094956	0.569131	0.633081	-0.78836	0.929198	0.499449	-0.0900572	0.518044	0.206438	0.0906375	0.610881	-0.33833
ec_548	RS5_HUMAN	-0.00780803	0.35382	0.296327	0.64467	-0.126478	0.684296	0.297109	-0.276714	0.792114	0.478629	-0.0524501	0.476741	0.172783	0.0536706	0.477206	0.214089
ec_548	RS5_HUMAN	0.191332	0.367074	0.333787	0.753085	-0.0587001	0.820867	0.53806	-0.439265	0.723011	0.457059	-0.0736564	0.778335	0.0668431	0.436528	0.644646	0.271158
ec_549	P5CR1_HUMAN	0.55952	0.183182	0.0217818	-0.318119	0.349045	0.0787019	-0.0136406	2.20544	0.188762	0.3236	0.0257473	-0.228167	0.158257	-0.342919	-0.441774	0.014063
ec_549	P5CR1_HUMAN	0.307364	0.126692	-0.0138684	-0.346081	0.525208	0.192218	0.19382	2.19956	0.159847	0.412757	0.107504	-0.215197	0.152933	0.0868828	-0.345967	-0.205734
ec_550	CO2_HUMAN	0.0865803	0.219859	0.0366925	0.203642	0.572778	-0.0442435	0.249584	1.30276	0.662529	0.337418	0.0733931	-0.248206	0.394451	-0.471348	-0.370744	-0.522469
ec_550	CO2_HUMAN	0.160589	0.367416	0.0876053	0.214952	1.29136	-0.073693	0.505658	1.0444	1.17211	0.391523	-0.028648	-0.44192	0.409879	-0.681159	-0.474396	-0.0312201
ec_551	GNPI1_HUMAN	0.127007	0.234276	0.308219	-0.420562	0.119658	0.50328	0.530597	1.66978	0.153762	0.355985	0.345688	0.547174	0.0895259	0.390454	-0.323492	0.372365
ec_551	GNPI1_HUMAN	0.305617	0.177103	0.286792	-0.482985	0.250729	0.556096	0.522969	3.41508	0.324886	0.451756	0.300786	0.625672	0.300512	0.488472	-0.402232	0.411882
ec_552	RL30_HUMAN	0.1541	0.0123424	0.234186	-0.476022	0.187843	0.631259	0.549782	3.50086	0.50668	0.641431	0.372307	0.576454	0.129174	0.49342	-0.318959	0.0146976
ec_552	RL30_HUMAN	0.172004	0.217858	0.282677	-0.3709	0.24269	0.0859192	0.637469	3.38465	0.445817	0.464232	0.340147	0.443819	0.253687	0.549358	-0.184905	0.15081
ec_553	PRDX2_HUMAN	0.621815	0.139714	0.232142	-0.26636	0.29671	0.460229	0.770692	0.154882	0.134136	0.308449	0.244331	0.334832	0.207216	0.790238	0.184986	0.144139
ec_553	PRDX2_HUMAN	0.774092	0.210493	0.249498	-0.264606	0.234854	2.01847	0.751096	0.360204	0.297277	0.348574	0.410649	0.711685	0.24245	0.993427	0.348911	0.179954
ec_554	RS19_HUMAN	-0.0155153	0.210544	0.130932	-0.274549	0.169649	1.98155	0.315336	0.215739	0.0863778	0.256484	0.221617	0.475456	0.101075	0.555694	0.186145	0.14833
ec_554	RS19_HUMAN	0.253057	0.133012	0.172632	-0.226602	0.236273	2.26209	0.556209	0.343642	0.202388	0.19319	0.427712	0.653515	0.0976375	0.687263	0.356013	0.101967
ec_555	MIF_HUMAN	0.0281725	-0.0827898	0.20898	-0.398417	0.842644	0.85601	0.841186	2.27788	0.539705	0.449233	0.182326	-0.314187	0.285169	-0.105467	-0.647537	-0.0526655
ec_555	MIF_HUMAN	0.252894	0.114681	0.221906	-0.3447	0.854746	0.781355	1.23041	2.10723	1.06672	0.576773	0.0533815	-0.0395877	0.464576	-0.0975593	-0.625632	-0.131462
ec_556	NOS2_HUMAN	0.332651	0.157846	0.396588	0.017228	-0.232252	0.673613	1.09205	0.325974	0.151703	0.252757	0.405254	0.381363	-0.066994	0.652452	0.483021	0.221202
ec_556	NOS2_HUMAN	0.334733	0.281587	0.531208	0.0837874	0.023023	1.07497	1.27817	0.312236	0.0675675	0.281401	0.558787	0.602095	-0.0183207	0.874107	0.717993	0.0464108
ec_557	MCM5_HUMAN	0.103583	0.557915	0.251291	-0.217813	0.0307895	1.09678	0.610733	0.393226	-0.1025	0.35281	0.437567	0.643703	0.117636	0.631323	0.487326	0.464586
ec_557	MCM5_HUMAN	0.0859294	0.369846	0.382945	-0.210175	0.111632	1.29884	0.8209	0.422153	-0.121044	0.360344	0.467324	0.706216	0.138243	0.671032	0.555441	0.415271
ec_558	RL7_HUMAN	0.105982	0.256712	0.419835	-0.120814	0.0476444	1.14516	1.11774	0.903674	0.108206	0.397653	0.664854	1.09051	0.160953	0.840545	0.516756	0.602476
ec_558	RL7_HUMAN	0.231924	0.451071	0.563733	-0.177662	-0.133195	0.680274	1.32357	2.23718	0.315379	0.352182	0.795942	1.02421	0.207859	0.926903	0.619252	0.556565
ec_559	LEUK_HUMAN	0.631066	-0.0483948	0.113869	1.34356	0.915455	0.333693	0.279105	-1.9806	1.42639	-0.740517	0.660514	-0.63418	1.16399	-1.44991	1.47632	0.0588607
ec_559	LEUK_HUMAN	0.676248	-0.0277201	0.183104	1.30441	0.857358	-0.00931139	0.27913	-2.40736	1.81368	-0.806493	0.410464	-0.327757	1.06701	-1.40542	0.494732	0.231733
ec_560	GFRP_HUMAN	0.383562	0.246813	0.0391284	-0.399174	0.349663	0.77123	1.01271	-0.103013	0.751398	-0.247599	0.998253	0.725149	0.689746	-0.0924507	0.648996	-0.334446
ec_560	GFRP_HUMAN	0.539059	0.337481	0.167731	-0.302411	0.384025	0.941665	1.14853	0.278126	0.765682	-0.254752	0.906984	1.04576	0.768585	0.0206608	0.871752	0.0469305
ec_561	CNN2_HUMAN	0.138643	1.05256	0.12714	1.07947	-1.1434	1.68013	-0.769123	1.31788	-0.599148	1.95795	-0.452201	1.9396	0.266207	1.86523	0.40518	0.643676
ec_561	CNN2_HUMAN	0.240142	1.20765	0.130893	1.19336	-1.14373	1.4992	-0.70859	1.2115	-0.747003	1.74617	-0.457259	2.00831	0.304004	2.12831	0.554975	0.852307
ec_562	THTM_HUMAN	0.193053	0.343904	-0.783386	-0.488833	2.0027	0.573643	0.394844	-0.34118	1.07482	-0.743807	1.80102	0.253715	1.57763	-0.61075	0.227835	-0.176528
ec_562	THTM_HUMAN	0.684115	0.357407	-0.722765	-0.794964	2.67177	0.927747	0.461413	-0.250534	1.59701	-0.581114	1.86261	-0.0724324	2.02407	-0.734343	0.537025	0.331865
ec_563	PO5F1_HUMAN	0.275651	0.665143	-0.548178	-0.572035	2.98101	1.36995	0.289994	0.321177	0.991091	-0.824219	1.32067	0.484833	2.31645	-1.07752	0.914649	-0.920776
ec_563	PO5F1_HUMAN	0.59476	0.586033	-0.401229	-0.603897	3.25012	1.22378	0.100375	-0.426445	1.88108	-0.743166	1.17796	-0.700314	2.26645	-1.19465	0.52758	-0.237392
ec_564	TMED2_HUMAN	0.45934	0.476385	-0.158209	-0.0788998	2.24785	1.18628	0.343929	-0.938571	1.65676	-0.64758	1.12289	0.517953	1.53213	-1.10934	1.42181	-0.159484
ec_564	TMED2_HUMAN	0.57495	0.370382	-0.0985653	0.0226887	2.22091	1.36559	0.4066	-1.14374	1.77815	-0.612336	0.535074	0.142994	1.86938	-1.09883	1.48657	-0.136726
ec_565	ZKSC1_HUMAN	-0.43555	-0.00956403	0.15745	-0.100552	-0.239256	0.223639	0.0817219	3.46528	-0.126474	0.0295859	-0.0313584	0.016027	-0.312536	0.134486	0.050688	-0.168814
ec_565	ZKSC1_HUMAN	-0.129338	-0.0703401	0.181586	-0.102018	-0.418832	0.497541	0.230568	3.80581	-0.604693	0.170137	-0.0114712	0.0125195	-0.233126	0.190125	0.496434	0.297669
ec_566	GSTM3_HUMAN	-0.151214	0.0565091	0.251351	-0.101778	0.0573462	0.746938	0.510512	0.216818	0.0933668	0.283533	0.179721	0.637457	-0.0595579	0.2932	0.102619	-0.281726
ec_566	GSTM3_HUMAN	-0.0564197	-0.0660376	0.180242	-0.0594672	0.0996118	0.816148	0.698415	0.0585527	-0.0588436	0.239028	0.0883449	0.386972	-0.0250016	-0.098	0.14875	-0.425257
ec_567	DLX4_HUMAN	-1.41593	-0.844806	-0.0740874	-0.470786	-1.9119	0.732875	1.45628	2.47185	-0.82098	-0.726198	-0.595787	0.567558	-0.378891	-1.49287	0.170674	0.27346
ec_567	DLX4_HUMAN	-1.13924	-0.788237	0.0300502	-0.233301	-2.017	0.615911	1.40109	2.24556	-0.982355	-1.64511	-0.598159	0.492944	-0.715053	-1.78147	0.304292	0.410771
ec_568	TEP1_HUMAN	0.0915145	0.0293313	0.0329108	0.35196	0.630191	0.213123	0.63481	0.796632	1.00476	-0.10674	0.0246105	-0.358144	0.532425	-1.35983	-0.0608882	-0.00312283
ec_568	TEP1_HUMAN	0.294628	0.0235898	0.0220137	0.609424	0.519663	0.241214	0.706509	0.65918	0.883875	-0.181517	0.00803061	-0.360048	0.464097	-1.2992	-0.0754364	0.131698
ec_569	DYH17_HUMAN	-2.80662	-1.56171	-0.800545	-4.14208	-1.19885	-0.00143703	-0.870595	3.81525	-1.64847	-1.62112	-1.64412	-0.446609	-0.771702	-0.947942	-3.24467	-1.55017
ec_569	DYH17_HUMAN	-3.29636	-1.82994	-0.889167	-4.1641	-1.50687	0.0518749	-0.670795	3.13615	-1.45267	-1.6922	-1.63856	-0.490965	-0.62073	-1.12031	-3.43848	-1.87045
ec_570	MUC5B_HUMAN	-0.190513	-0.17731	0.384144	-2.31734	0.470264	0.921394	1.47162	3.74277	0.342248	0.267158	-0.0435294	0.131528	0.288145	-0.395203	-1.26373	-0.255589
ec_570	MUC5B_HUMAN	-0.125898	-0.294839	0.396411	-2.26294	0.524753	1.00882	1.81852	3.66119	0.117071	0.274401	0.139002	0.0216496	0.0369233	-0.524541	-1.89644	-0.541129
ec_571	MOT7_HUMAN	-2.81969	-1.34203	-0.729735	-3.84277	-1.27678	-0.124598	-0.691236	3.22568	-0.45634	-1.64656	-1.46023	-0.761985	-0.751325	-0.936901	-2.42304	-1.24262
ec_571	MOT7_HUMAN	-3.37014	-1.91484	-0.929185	-4.1563	-1.67472	-0.299642	-0.473951	3.0264	-1.94345	-1.80349	-2.00137	-1.01275	-1.22069	-1.35352	-2.41458	-2.04583
ec_572	NPY4R_HUMAN	-0.380712	-0.232428	0.0084152	-2.81369	0.401526	2.37654	1.30905	4.24953	-0.0637868	-0.15477	-0.121915	0.178536	-0.00637805	0.042549	-1.95487	0.0796815
ec_572	NPY4R_HUMAN	-0.41166	-0.132102	0.186803	-2.53423	0.552098	2.31714	1.06211	4.16306	0.149181	-0.285446	-0.00296981	0.296982	-0.0431412	0.453046	-1.3082	-0.161516
ec_573	ZBT22_HUMAN	-1.23547	-0.543552	0.13074	-3.14311	0.509225	1.25756	1.6282	4.612	0.0129058	-0.465879	-0.199803	0.213025	0.119384	-0.426954	-2.15056	-0.00405468
ec_573	ZBT22_HUMAN	-1.07053	-0.693075	0.031503	-3.10681	0.374198	1.24023	1.71648	4.27713	0.150607	-0.537044	-0.119796	0.310524	-0.0102485	-0.395238	-1.41355	-0.204739
ec_574	GMFG_HUMAN	-0.0523761	0.0997674	0.0087716	-0.317524	0.348105	0.861945	0.580186	1.68369	0.689925	0.537034	0.0449171	0.39815	0.125564	0.0615085	-0.487192	-0.0778796
ec_574	GMFG_HUMAN	0.101589	0.333035	0.269161	-0.268781	0.243311	0.862349	0.551935	1.72336	0.738433	0.626281	0.0930876	0.124886	0.17694	-0.146349	-0.406221	-0.41858
ec_575	GPM6B_HUMAN	0.22645	0.45544	0.367521	-0.663117	0.597019	1.30674	0.80918	3.8943	0.849235	0.396056	0.42284	0.738183	0.0684923	0.572072	-0.681201	0.24524
ec_575	GPM6B_HUMAN	0.379937	0.607162	0.188096	-0.582625	0.541854	1.46753	0.874788	3.44	0.905259	0.528142	0.460871	0.408529	0.103271	0.523426	-0.79712	0.145207
ec_576	TPC11_HUMAN	0.564358	0.801041	0.175301	-0.177142	-0.302768	0.349195	0.855128	0.425899	-0.129255	0.538633	0.0838585	0.245309	-0.163194	0.305866	0.694985	0.580926
ec_576	TPC11_HUMAN	1.00958	0.915914	0.568395	-0.224984	-0.133638	0.439795	1.76974	1.18643	-0.272592	0.428306	0.340754	0.440379	-0.351351	0.558635	0.496324	0.98144
ec_577	CHST5_HUMAN	0.649249	0.771424	0.340548	-0.494211	-0.269366	0.332419	1.07863	1.25247	-0.0666873	0.965727	0.174177	0.456791	0.189656	0.410658	0.853657	0.128651
ec_577	CHST5_HUMAN	0.857164	0.865474	0.524067	-0.516016	-0.329975	0.336524	1.25412	1.14963	0.19562	1.01626	0.352459	0.62441	0.148744	0.684194	1.11541	0.954178
ec_578	MOXD1_HUMAN	0.456908	0.459282	0.129717	-0.26698	0.0663828	0.614017	0.943577	3.91181	0.438227	0.572778	-0.15411	0.539209	0.0124754	0.497285	-0.949582	0.126739
ec_578	MOXD1_HUMAN	0.73826	0.640582	0.279882	-0.270769	0.109009	0.543042	1.12347	3.22087	0.428207	1.08542	-0.0908063	0.800062	-0.00378593	0.558236	-0.926001	0.903193
ec_579	DDAH2_HUMAN	-0.319304	0.226329	0.244175	-1.65069	0.894259	0.945238	0.272491	5.71363	-0.0559392	0.31583	-0.234367	0.45961	0.0423808	0.459196	-2.17376	0.255973
ec_579	DDAH2_HUMAN	0.111334	0.223606	0.387881	-1.82259	1.26182	0.853907	0.707434	6.28695	-0.00100649	0.601675	0.207856	0.412796	0.379775	0.366709	-2.90897	0.646883
ec_580	BGH3_HUMAN	-2.9287	0.22821	1.34489	-0.000903346	-0.186429	1.32997	-0.468143	3.68665	-2.49115	0.186947	0.578121	0.769556	-0.0983012	0.968208	0.427805	1.45394
ec_580	BGH3_HUMAN	-2.91634	0.822353	1.46348	0.254107	-0.256418	1.70196	-0.0302638	3.87581	-2.30982	0.141549	0.667845	1.05417	-0.184418	1.15983	0.29001	1.63423
ec_581	IFM2_HUMAN	-3.3629	0.179482	1.25424	0.137887	-0.0186699	1.56771	-0.780302	4.25831	-2.63997	0.220354	0.686508	0.901375	-0.212518	0.761122	0.155706	2.38913
ec_581	IFM2_HUMAN	-3.10448	0.389812	1.33371	0.338654	-0.0920193	1.72932	-0.565775	4.25084	-2.58699	0.130001	0.68937	0.954634	-0.199616	0.779223	0.0484879	2.26077
ec_582	RS15_HUMAN	-0.502528	-0.248166	-0.789177	-0.753391	-1.39044	1.8475	2.11264	2.83023	0.214802	0.748363	0.0776651	1.2958	-0.37066	-1.25497	0.530076	0.829971
ec_582	RS15_HUMAN	-0.350941	-0.372649	-0.838958	-0.728424	-1.57855	1.77366	2.0501	2.35325	0.191415	0.731249	-0.0949288	1.31128	-0.162665	-1.08715	0.972468	0.954696
ec_583	RL8_HUMAN	-0.693329	-0.222516	-0.552725	-1.76239	-1.14672	1.6756	2.35854	3.30483	0.737438	0.676812	0.00761407	0.849067	0.155474	-0.463923	-0.325051	0.0658342
ec_583	RL8_HUMAN	-0.128623	-0.321752	-0.576825	-1.68034	-1.0995	1.5133	2.31203	3.15162	0.746859	0.886645	0.320429	0.99699	0.21163	-1.06541	-0.164584	0.577791
ec_584	RS2_HUMAN	-0.0934028	0.0459915	0.1827	-0.216638	0.528659	1.04717	0.070346	3.21063	-0.315248	-0.135546	-0.00537307	0.129261	0.00113642	0.279513	-0.386484	0.193745
ec_584	RS2_HUMAN	-0.0857391	0.0783025	0.266361	-0.211723	0.508743	1.20542	0.281612	3.48164	-0.278101	-0.127525	-0.0214221	0.234845	-0.0423685	0.399253	0.0109331	-0.0670378
ec_585	S29A1_HUMAN	-0.143149	-0.169066	1.22071	0.00859258	1.59508	1.74293	3.34754	4.9962	-0.314265	0.421971	0.184857	0.53616	0.293889	-0.0263595	-0.833646	0.7776
ec_585	S29A1_HUMAN	0.0409283	-0.144589	1.3232	-0.0998257	1.61296	1.83032	3.67989	4.84109	-0.248982	0.415909	0.206003	0.578306	0.277459	0.0125237	-0.383906	0.997715
ec_586	NUCL_HUMAN	0.531416	0.250712	-0.0434409	-0.224585	0.128155	1.54647	-0.0374176	2.82586	0.496264	-0.130492	0.379978	0.355132	0.869135	-0.119784	-0.0725404	0.236164
ec_586	NUCL_HUMAN	0.159939	0.334096	-0.0380309	-0.278712	0.164632	1.3603	0.136813	2.05445	0.594283	-0.0607569	0.474935	0.195177	0.946591	0.0992233	-0.0243351	0.459367
ec_587	VATF_HUMAN	0.496551	0.214949	-0.147278	-0.429651	0.233672	1.85235	-0.028198	3.3937	0.223425	-0.124996	0.531845	0.26269	0.980175	-0.229406	-0.295093	0.40632
ec_587	VATF_HUMAN	0.361216	0.272418	-0.13941	-0.565431	-0.514259	1.64328	0.028993	3.48967	0.968124	-0.278624	0.650224	0.219577	1.16793	-0.198574	-0.625677	0.507612
ec_588	LDHB_HUMAN	0.104883	-0.0863382	-0.0170394	-0.0300387	0.0041599	-0.0277702	-0.299168	0.929126	-0.0888464	-0.194606	0.0677708	0.0980351	0.0308024	0.221694	-0.0953828	0.065078
ec_588	LDHB_HUMAN	-0.0237101	0.10338	0.105418	-0.0165401	-0.0141153	0.00782027	-0.136673	1.13263	-0.0292858	-0.193623	0.179008	0.269718	0.148816	0.465129	0.0993482	0.062887
ec_589	TCPH_HUMAN	-0.92184	-0.286441	-0.720304	-2.64578	1.02418	0.867105	0.704585	1.18129	-0.312031	-0.566287	1.04875	-0.00338725	0.873285	-0.218804	-1.43681	-0.760812
ec_589	TCPH_HUMAN	-0.637257	-0.251064	-0.707248	-2.24561	0.942552	0.838372	0.657889	1.11651	0.346858	-0.610792	0.967052	0.320164	0.788023	0.0414719	-0.969404	-0.780088
ec_590	RL10A_HUMAN	-0.331807	-0.0994599	-0.590225	-2.14333	0.613267	0.384001	0.673495	0.320767	0.117113	-0.629748	0.94199	0.699325	0.284387	0.270359	-0.361787	0.192011
ec_590	RL10A_HUMAN	-0.342223	-0.191166	-0.691737	-2.43847	0.56681	0.574342	0.866678	0.319773	0.240782	-0.625482	0.276359	1.34394	0.190706	0.496282	-0.109926	0.101884
ec_591	EPHB3_HUMAN	-0.149488	0.0434167	0.18582	-0.0858779	0.0231795	0.485117	0.0902202	1.92425	-0.164946	-0.0470824	0.166044	0.238268	0.0595793	0.425637	0.0959068	0.377597
ec_591	EPHB3_HUMAN	-0.11478	0.0203243	0.177385	-0.122329	0.0216101	0.58581	0.33806	0.388753	-0.18295	0.0070979	0.18396	1.41624	0.0355336	0.714559	0.0795465	0.342966
ec_592	GPX4_HUMAN	0.147666	0.100536	-0.00290389	-0.0331833	-0.0258254	0.210216	-0.183837	-0.0857983	-0.12447	-0.193318	0.10713	0.0268363	0.0876533	0.26331	-0.194853	0.355768
ec_592	GPX4_HUMAN	-0.448153	0.152984	-0.0575319	-0.147845	-0.0170924	0.17219	-0.263023	0.570678	-0.136732	-0.111722	0.0132876	-0.0326185	0.0547306	0.330504	-0.160718	0.336378
ec_593	EIF3B_HUMAN	-1.38212	-0.244073	0.390402	-2.90001	0.284908	1.0269	1.84284	3.67881	-0.0773641	-0.106309	-0.232064	0.614336	0.414432	0.604796	-1.40579	0.651338
ec_593	EIF3B_HUMAN	-1.60909	-0.498825	0.389258	-3.26681	0.132814	0.891334	0.477871	3.75357	-0.107306	-0.11265	-0.100076	0.554052	0.204909	0.277846	-1.19615	0.481461
ec_594	MGAP_HUMAN	-0.870428	-0.342288	0.171551	-3.21191	0.316337	0.920914	1.19685	3.48936	0.1841	0.0721865	0.0321718	0.362969	0.383657	0.299453	-1.38813	0.26322
ec_594	MGAP_HUMAN	-0.712311	-0.268499	0.261	-3.04101	-0.0601517	1.01734	2.06069	3.27379	-0.124778	0.00313597	0.241103	0.524323	0.327064	0.871517	-0.799536	0.426081
ec_595	TGFA_HUMAN	-0.428373	-0.291801	-0.104009	-0.641535	-0.0915392	-0.0454137	0.138131	0.328861	-0.348719	-0.124434	-0.0495254	0.217322	0.0282698	0.14513	-1.20575	-0.0250662
ec_595	TGFA_HUMAN	-0.392334	-0.350005	-0.1148	-0.606967	-0.158109	0.00138909	0.357473	0.564235	-0.27455	-0.118959	0.00968631	0.266863	-0.104135	0.179129	-1.12637	-0.147198
ec_596	PABP1_HUMAN	-0.0901735	0.111427	0.110513	-0.0698856	0.0162143	0.203739	0.0477966	1.64518	0.0179966	0.141787	0.17032	0.175575	0.0630494	0.211093	-0.0835955	0.0393309
ec_596	PABP1_HUMAN	0.212165	0.0658582	0.146517	-0.0770305	-0.0535115	0.221093	0.152825	3.66966	0.230391	0.273681	0.300114	0.230229	0.0306203	0.326346	0.147776	0.132596
ec_597	CP2C8_HUMAN	-0.068499	0.0419897	0.248407	-0.0310631	0.0959235	0.400381	0.611186	0.344512	-0.0305776	0.0980515	0.448297	0.537641	0.0598604	0.62003	0.199609	0.230375
ec_597	CP2C8_HUMAN	-0.00138968	0.0139925	0.256816	-0.0995062	0.0471349	0.24312	0.593238	0.396065	0.0154414	0.081136	0.451404	0.802111	0.121488	0.679167	0.175994	0.190395
ec_598	HSP7C_HUMAN	-0.250641	-0.243868	-0.000673818	-0.130707	-0.192347	-0.0472593	0.0622018	-0.0316515	-0.168228	-0.11203	-0.0645385	0.00959269	-0.0408442	-0.0538953	-0.12065	-0.0931612
ec_598	HSP7C_HUMAN	-0.176826	-0.0658512	0.104114	-0.118447	-0.288125	-0.0550424	0.203011	-0.0106612	-0.275271	-0.0347296	-0.0337086	-0.060832	0.0309186	0.187436	-0.13982	-0.109308
ec_599	INGR1_HUMAN	-0.249865	-0.0776513	-0.206921	-0.151061	-0.0231088	-0.115678	-0.433531	-0.173991	-0.189098	-0.263138	-0.0270387	-0.143409	0.0592956	0.00799111	-0.261214	-0.0458439
ec_599	INGR1_HUMAN	-0.0359003	-0.211622	-0.061549	-0.178926	-0.217152	-0.0400477	0.469019	-0.100687	0.0376568	0.252869	0.0206177	0.117869	-0.202153	0.278026	0.12322	-0.0783218
ec_600	RSSA_HUMAN	0.105734	-0.101941	0.0271075	-0.146347	-0.203007	0.0513605	0.252965	0.218288	-0.132	0.18325	0.0470036	0.0338789	-0.0395171	-0.064552	-0.00403467	-0.0409704
ec_600	RSSA_HUMAN	0.129625	-0.264877	0.0277035	-0.159339	-0.341894	0.00850216	0.289672	0.253188	-0.133818	0.226699	0.084464	0.0436837	-0.0388931	0.268248	0.171698	-0.103963
ec_601	PO2F1_HUMAN	-0.0572961	-0.170845	-0.13257	-0.154388	-0.157617	0.147782	0.157137	-0.194542	-0.188721	0.0515363	-0.0352524	-0.025481	-0.00131256	0.115303	-0.224076	-0.0746335
ec_601	PO2F1_HUMAN	-0.132072	-0.293345	-0.0293686	-0.170437	-0.281614	0.00487133	0.153359	-0.141618	-0.1817	0.141683	-0.0201679	-0.141933	-0.0276043	0.196022	0.0351133	-0.106382
ec_602	LAT1_HUMAN	-0.0551639	-0.425268	0.0389038	-0.222307	-0.2422	0.0112513	-0.0611244	-0.00922662	-0.309949	-0.39232	-0.205619	-0.349261	-0.145587	-0.128139	-0.311911	-0.119281
ec_602	LAT1_HUMAN	-0.153329	-0.225163	-0.03113	-0.136386	-0.263475	-0.0645917	-0.0621028	0.0387564	-0.26552	-0.354162	-0.236536	-0.342569	-0.188436	-0.0375526	-0.202658	-0.0569533
ec_603	KPYM_HUMAN	-0.0285708	-0.172323	0.0227796	-0.146284	-0.145499	0.0965646	0.25624	0.116471	-0.0968221	0.152838	0.00764153	-0.318087	0.0722831	0.0258479	0.197529	-0.00397711
ec_603	KPYM_HUMAN	-0.117852	-0.0367975	0.183776	-0.12895	-0.237774	0.00109774	0.423889	0.407582	-0.235436	-0.0781314	0.19217	0.325057	-0.120412	0.0793708	0.339623	-0.029679
ec_604	SP1_HUMAN	-0.113182	-0.225779	0.00297477	-0.167348	-0.30739	0.0895402	0.199547	0.245974	0.068358	0.0264485	0.0230224	0.0378759	-0.112949	0.212373	0.345213	-0.0371197
ec_604	SP1_HUMAN	0.186209	-0.192077	0.0612798	-0.158147	-0.310183	0.00492416	0.135734	0.218197	-0.0489224	0.232252	-0.00647948	0.0884786	-0.217502	0.230821	0.194568	-0.198437
ec_605	NGAL_HUMAN	0.0970951	-0.391256	-0.184739	0.313796	-0.463837	-0.235097	-0.660198	-0.167933	-0.264727	-0.528825	-0.177712	-0.252542	-0.477218	-0.126458	0.0511601	0.653033
ec_605	NGAL_HUMAN	0.258062	-0.347566	-0.136692	0.277775	-0.5532	-0.238846	-0.618952	-0.223366	-0.248644	-0.468379	-0.18009	-0.11322	-0.491399	-0.0650416	0.2552	0.689666
ec_606	TIA1_HUMAN	-0.0683331	-0.125951	-0.109157	-0.150227	-0.401252	0.0791912	0.0808171	-0.295133	-0.193789	-0.267985	-0.0844011	-0.104171	-0.297396	-0.0452503	0.0682743	0.153257
ec_606	TIA1_HUMAN	-0.196168	-0.134626	0.0437296	-0.125173	-0.546474	-0.000192062	-0.0918959	0.30599	-0.15108	-0.0124541	-0.282577	-0.109144	-0.321989	-0.0584634	0.131115	0.155302
ec_607	MK09_HUMAN	-0.120968	0.0379216	0.0328006	-0.129658	-0.27538	0.0622599	0.0824081	0.0044223	-0.230369	-0.0645021	0.0877058	0.212764	-0.0600985	0.252755	0.110716	0.247665
ec_607	MK09_HUMAN	-0.0110158	0.142085	0.0724439	-0.187937	-0.269742	0.264923	0.269719	0.129385	-0.171246	0.218669	0.0922057	0.283231	-0.248756	0.565025	0.298422	0.308752
ec_608	OLFM4_HUMAN	0.393522	0.200275	0.182327	-0.00614631	-0.143539	0.107705	0.0952943	-0.127616	-0.185485	-0.062084	0.0538408	-0.00113259	-0.0292859	0.279912	0.0776207	0.279349
ec_608	OLFM4_HUMAN	0.562415	0.0743311	0.172618	-0.0490507	-0.506721	0.165851	0.82801	0.230864	-0.0895028	0.0725066	0.0364677	0.0658703	-0.0706318	0.314778	0.09386	0.455237
ec_609	AP4B1_HUMAN	0.609957	0.173725	0.351268	0.0259171	-0.263198	0.189416	0.440336	0.0165133	-0.0659787	-0.208722	0.0670982	0.0842738	-0.0670823	0.327921	0.122068	0.28367
ec_609	AP4B1_HUMAN	0.361627	0.196096	0.28918	-0.0315709	-0.432231	0.195734	0.695127	0.0178284	-0.0538556	0.30402	0.0276106	0.14775	0.036197	0.449593	0.64642	0.315085
ec_610	TM9S2_HUMAN	0.248382	-0.20097	-0.0403799	0.157403	-0.373105	-0.027893	-0.0372939	-0.0745124	-0.15951	-0.373246	0.145117	-0.27043	-0.281114	0.258298	0.201729	0.56176
ec_610	TM9S2_HUMAN	0.300709	-0.264271	0.0832669	0.239591	-0.458154	-0.0486774	-0.0527195	-0.0853313	-0.315285	-0.374968	0.252298	0.179082	-0.255564	0.308723	0.305172	0.419308
ec_611	FINC_HUMAN	0.222229	-0.22813	-0.17351	0.238697	-0.0303461	-0.250668	-0.601969	-0.247349	0.0581498	-0.424737	0.00726791	-0.413527	-0.119625	0.00991507	0.0676175	0.104463
ec_611	FINC_HUMAN	0.333228	-0.26237	-0.114693	0.197515	-0.0929769	-0.266814	-0.538574	-0.183403	-0.238133	-0.513964	0.13511	-0.371712	0.0324567	0.194411	0.18338	0.10551
ec_612	IGHA1_HUMAN	0.19203	-0.331694	-0.166732	0.382875	-0.491669	-0.206312	-0.747042	-0.260395	-0.199807	-0.402723	-0.10926	-0.264532	-0.414149	0.0379994	0.0826536	0.47432
ec_612	IGHA1_HUMAN	0.323343	-0.363385	-0.112994	0.364373	-0.561579	-0.077018	-0.647518	-0.247614	-0.255887	-0.468811	-0.115398	-0.106393	-0.465728	0.10146	0.191631	0.476582
ec_613	TSG6_HUMAN	0.0173323	-0.292267	-0.12424	0.203682	-0.218276	-0.198609	-0.726704	-0.238369	-0.126126	-0.40639	-0.13994	-0.660385	-0.19013	-0.256231	-0.112249	0.0601094
ec_613	TSG6_HUMAN	0.598743	-0.262717	-0.0897657	0.178571	-0.364027	-0.396077	-0.757905	-0.156144	-0.275287	-0.466347	-0.27081	-0.721283	-0.211961	-0.0499206	0.202738	-0.150312
ec_614	GRB2_HUMAN	0.187457	-0.321136	-0.173333	0.0555584	-0.413994	-0.354393	-0.769095	-0.230291	-0.206437	-0.418921	-0.243699	-0.677487	-0.356872	-0.272847	-0.0742424	-0.101011
ec_614	GRB2_HUMAN	-0.131526	-0.141454	-0.162141	0.132752	-0.327271	-0.327345	-0.661499	-0.132511	-0.314162	-0.448341	-0.163273	-0.637409	-0.185723	-0.157775	0.0300828	-0.0435289
ec_615	RL10_HUMAN	0.226444	-0.200348	0.145751	-0.165282	-0.248498	0.114652	0.464275	-0.115288	0.0259425	0.401753	0.0458186	0.163298	-0.0258431	0.228419	0.52783	-0.100894
ec_615	RL10_HUMAN	0.0524185	-0.135665	0.146852	-0.171393	-0.307259	0.0626095	0.465411	0.613359	0.0776732	0.371944	0.0784614	0.195434	-0.035862	0.343226	0.675623	-0.0279003
ec_616	LAC1_HUMAN	-0.0316993	-0.115437	0.129248	-0.241097	-0.321197	0.219095	0.721008	0.661679	0.096052	0.282112	0.148669	0.253042	0.0366174	0.2773	0.606908	-0.0960814
ec_616	LAC1_HUMAN	0.30966	-0.0806314	0.106957	-0.231795	-0.235654	0.158287	0.615786	0.626137	0.0860061	0.511564	0.226856	0.327983	0.0586482	0.331417	0.749102	-0.0797183
ec_617	ERBB2_HUMAN	-0.0102679	-0.0807416	0.251302	-0.164385	-0.0552769	0.152553	0.627789	0.347078	0.0476355	0.128774	0.103416	0.194364	-0.107028	0.264236	0.0583703	-0.133544
ec_617	ERBB2_HUMAN	0.105173	-0.0451545	0.225532	-0.198026	-0.084833	0.259636	0.820764	0.207306	-0.0567438	0.416103	0.214896	0.203419	-0.212458	0.20308	0.488741	-0.0882623
ec_618	TNF13_HUMAN	-0.130935	-0.136564	0.0338748	-0.246515	-0.0201844	0.145841	0.223419	0.0039688	-0.199859	0.00918732	-0.0488516	0.111451	-0.0910727	0.0886358	0.160552	-0.0341559
ec_618	TNF13_HUMAN	0.017725	0.00038568	0.181166	-0.187375	0.109449	0.394609	0.340777	0.197852	-0.0441789	0.221138	-0.0134073	0.139982	-0.145705	0.186851	0.298283	0.0278095
ec_619	MLH1_HUMAN	0.0680995	-0.0547853	0.0450172	-0.191977	-0.234556	0.0943345	0.861693	-0.144937	0.00741718	-0.079404	0.100641	0.186635	0.174455	0.114198	0.370542	-0.103605
ec_619	MLH1_HUMAN	0.41082	0.0714818	0.337016	-0.16553	-0.342886	0.078121	0.944174	-0.129132	0.0290122	0.329615	0.190823	0.239658	-0.0801624	0.201192	0.243351	-0.0279758
ec_620	TIMP1_HUMAN	0.420944	-0.0767699	0.179531	-0.279376	-0.00492983	0.167386	0.437082	-0.0714342	-0.150664	-0.00546986	0.067779	0.204265	0.148524	0.21946	-0.169724	-0.0706436
ec_620	TIMP1_HUMAN	0.493855	0.0322188	0.418621	-0.315239	0.0136003	0.33297	1.43653	0.250831	-0.157556	0.348341	0.244546	0.295678	-0.0669047	0.532855	0.0744009	0.15405
ec_621	TF_HUMAN	-0.150392	-0.175181	0.194335	-0.50968	-0.0438064	0.0598542	0.734614	0.42139	-0.213943	-0.136824	-0.120828	0.302546	0.0389344	0.205791	-0.517818	-0.124419
ec_621	TF_HUMAN	-0.000555213	-0.124271	0.0417688	-0.53576	-0.0803172	0.174283	0.777643	0.659105	-0.238158	0.269608	0.113729	0.515808	-0.0811494	0.0779666	-0.0805329	-0.134457
ec_622	IL8_HUMAN	-0.0993749	0.321454	0.0423783	-0.305891	-0.19197	0.22811	0.416149	-0.0189992	-0.184296	0.242121	-0.0690619	0.312991	-0.324572	0.327404	-0.146169	0.367698
ec_622	IL8_HUMAN	-0.130544	0.24821	0.0546703	-0.33104	-0.405683	0.859659	0.50014	0.0477697	-0.120207	0.0615238	-0.10125	0.401491	-0.518128	0.356766	0.0378984	0.268946
ec_623	GAS1_HUMAN	0.251694	-0.0667197	-0.0715799	0.013539	-0.212072	-0.107228	0.0593117	-0.208793	-0.137015	-0.251335	-0.0414163	-0.165776	0.0781978	0.0234434	0.37739	0.0919296
ec_623	GAS1_HUMAN	0.385598	-0.157052	-0.00282594	-0.0298464	-0.454255	-0.0325943	0.418206	-0.106314	-0.116956	0.062928	0.0693712	-0.182671	-0.169481	0.111778	0.48613	0.134678
ec_624	MPIP3_HUMAN	0.0940653	-0.305958	0.0271212	0.206006	-0.238901	-0.0601888	-0.323233	-0.10738	-0.0648873	-0.295144	0.155761	-0.181382	-0.175689	0.299436	0.16351	0.055222
ec_624	MPIP3_HUMAN	0.0984843	-0.37875	0.0584996	0.177788	-0.257345	-0.0238256	-0.358555	-0.0727023	-0.183458	-0.386378	0.00504126	-0.381144	-0.209251	-0.128854	0.216632	-0.144696
ec_625	FOLR1_HUMAN	0.244265	0.106654	0.0767562	0.0464331	-0.0923368	-0.0192236	0.213018	0.00878965	0.00150474	-0.170259	0.0493461	-0.116896	0.0684131	0.0295406	0.103397	0.0616025
ec_625	FOLR1_HUMAN	0.644258	-0.095423	0.0844822	0.0162152	-0.304589	-0.0177487	0.581062	0.421512	0.152584	-0.095256	0.089805	-0.166654	-0.0434665	0.303879	0.709234	0.0409405
ec_626	VEGFA_HUMAN	0.688546	-0.160396	0.139225	0.134696	-0.28233	-0.0665978	0.361131	0.557056	-0.00579424	-0.114223	-0.168114	0.0388329	-0.11666	0.593801	0.493044	-0.0691236
ec_626	VEGFA_HUMAN	0.760884	-0.0114914	0.363246	0.174509	-0.26074	-0.0339552	0.478324	0.390482	-0.00859321	-0.0606418	-0.0863265	-0.0508683	-0.0477359	0.322113	0.751211	-0.140803
ec_627	AQP1_HUMAN	-0.956119	0.0751038	-0.561463	0.677664	-2.00892	0.848448	0.583228	1.00255	0.276064	4.19879	-0.893495	2.83902	0.152251	1.83209	1.7211	0.655738
ec_627	AQP1_HUMAN	-0.93587	0.0965531	-0.575773	0.615686	-1.98467	0.945268	0.807383	0.9024	-0.0197409	4.23681	-0.871334	2.74248	-0.0383615	1.95735	1.26952	0.709911
ec_628	SYG_HUMAN	0.0867124	-0.0574957	0.118507	0.345751	-1.75843	0.0220599	0.342135	0.43346	-0.331755	0.967542	-0.108547	0.865047	-1.41435	0.700081	0.438204	-0.116242
ec_628	SYG_HUMAN	0.193162	-0.0778716	0.167774	0.340716	-1.8513	0.152756	0.459357	0.538848	-0.345922	1.13746	-0.0767269	0.727758	-1.546	0.676644	0.562121	0.125239
ec_629	NFKB2_HUMAN	-0.00562682	-0.236937	0.158385	-0.0940691	-0.216724	-0.062691	0.255608	-0.195538	-0.132408	-0.144082	-0.00294481	0.00143519	-0.042596	0.16492	0.185724	-0.117215
ec_629	NFKB2_HUMAN	0.0573473	-0.248396	0.184329	-0.149378	-0.280984	0.0683813	0.193736	-0.123656	0.0184014	-0.0192176	0.0214946	0.0621483	-0.0531969	0.088131	0.188098	-0.172809
ec_630	SYPH_HUMAN	0.406507	-0.0299643	-0.00280825	-0.236881	-0.0900362	-0.00823523	0.152179	-0.0439511	0.0310624	0.0885771	-0.024208	-0.0837909	0.0137006	0.164347	0.0583918	-0.103531
ec_630	SYPH_HUMAN	-0.146934	0.0927759	0.175268	-0.179902	0.0212101	0.0483645	0.40238	0.0443697	0.117354	0.0352851	0.078982	-0.168989	0.110355	0.228923	0.14276	-0.0616877
ec_631	CCL4_HUMAN	-0.001875	-0.164695	0.155828	-0.14902	-0.207234	0.471164	0.20986	-0.0486273	0.018851	0.0618355	0.290518	0.00961292	0.0441178	0.373244	0.242478	-0.0590829
ec_631	CCL4_HUMAN	0.0465164	-0.0440711	0.120158	-0.156834	-0.0722079	0.392052	0.618917	0.0651798	-0.115698	0.359173	0.158562	0.182018	-0.0634798	0.357267	0.446504	-0.0133623
ec_632	GBRB1_HUMAN	0.137308	0.0303571	-0.0741247	1.54177	1.44604	0.365941	-0.294097	0.119835	0.665291	0.213056	0.215095	0.419487	1.02379	0.25126	0.198273	-0.077224
ec_632	GBRB1_HUMAN	0.39205	0.042484	-0.100077	-0.280599	1.62735	0.0868838	-0.190198	0.471891	0.856002	0.195219	0.427495	0.462152	0.050201	0.202566	0.605913	-0.0797399
ec_633	L1CAM_HUMAN	-0.0837662	-0.0782543	0.104965	-0.110112	-0.02987	0.505172	0.335067	0.263357	0.0086649	0.0153956	0.0194355	-0.0433433	-0.0971348	0.22506	0.292232	-0.104241
ec_633	L1CAM_HUMAN	0.0671122	-0.0602578	0.0714667	-0.142046	-0.215821	0.487545	0.823434	-0.0119197	-0.0370878	0.179742	0.161558	0.114702	-0.113393	0.299066	0.226192	-0.0328093
ec_634	TMOD3_HUMAN	0.233054	-0.203146	-0.183031	0.223702	-0.586765	-0.370206	-1.04307	-0.270247	-0.366665	-0.492774	-0.46907	-0.968305	-0.612547	-0.103334	-0.033462	-0.173673
ec_634	TMOD3_HUMAN	0.166267	-0.412776	-0.226681	0.382944	-0.611049	-0.479619	-0.858015	-0.345796	-0.386096	-0.53855	-0.257491	-0.461579	-0.614636	0.0582573	0.0448369	0.223012
ec_635	FUBP1_HUMAN	0.393747	0.27765	0.298913	-0.147652	-0.125692	0.23794	0.608718	-0.0396905	-0.0827551	0.216667	0.213377	0.0686126	-0.112259	0.448117	0.493685	-0.0628304
ec_635	FUBP1_HUMAN	0.414208	0.105779	0.41034	-0.136009	-0.22687	-0.0562352	1.14004	-0.0420734	0.0406225	0.698175	0.268235	0.182569	-0.0600722	0.365737	0.523238	0.0266448
ec_636	IL1RA_HUMAN	0.365696	0.0758039	0.255139	0.0822002	-0.178633	0.272152	0.611639	0.158592	0.0312055	0.0316609	0.0794171	-0.0659058	0.0467061	0.236405	0.375565	0.0272462
ec_636	IL1RA_HUMAN	0.543638	0.0554446	0.363484	0.222735	0.136027	0.363041	0.814827	0.335246	0.0434014	0.179255	0.381269	0.0865535	-0.0389391	0.389824	0.662874	0.34203
ec_637	PAI1_HUMAN	-0.180908	0.225406	0.14138	-0.251978	-0.103487	0.387021	0.472974	0.0995437	-0.169613	0.112192	0.0822624	0.367888	-0.0517757	0.338627	-0.0257783	-0.00775368
ec_637	PAI1_HUMAN	0.205986	0.114432	0.364549	-0.251523	0.0646754	0.381838	0.918489	0.208153	-0.176918	0.538325	0.366662	0.708427	-0.150941	0.795994	0.666145	-0.00275817
ec_638	DHB8_HUMAN	0.225383	0.219167	-0.00820706	0.466742	0.828981	0.268129	-0.862275	0.568978	-0.277976	0.00263856	0.0613495	0.738994	-0.0201066	-0.358446	0.967199	0.492839
ec_638	DHB8_HUMAN	0.247025	0.221842	0.0147038	0.483777	0.853699	0.294258	-0.772237	0.556939	-0.238953	-0.0310524	-0.232191	0.79029	0.0699273	-0.244584	0.748018	0.466826
ec_639	MYD88_HUMAN	0.289076	-0.0133118	0.0786285	-0.18023	0.275426	0.0795755	0.22433	1.30995	0.301316	0.172447	0.137214	0.0616068	0.208793	0.158407	-0.034935	0.0753686
ec_639	MYD88_HUMAN	0.122886	0.0728503	0.134597	-0.233904	0.334769	0.115134	0.451825	1.45765	0.321952	0.188129	0.240396	0.0856356	0.227299	0.248479	0.087304	0.227554
ec_640	HPRT_HUMAN	0.234583	-0.0680562	0.0981492	-0.4812	1.23178	0.362082	1.72711	3.586	1.52372	1.00243	0.506222	0.538813	1.00952	-0.0557526	-0.900648	0.431479
ec_640	HPRT_HUMAN	0.233822	-0.0484954	0.161186	-0.508635	1.42484	0.28658	1.57702	3.03305	1.76128	1.02995	0.362913	0.128129	1.07976	-0.235409	-0.766658	0.356863
ec_641	TR10B_HUMAN	0.326028	0.216377	-0.180474	-0.0946636	1.58546	0.357549	0.370616	0.0119054	0.868283	0.0138859	0.341867	0.231895	0.860582	0.125421	0.232407	0.278766
ec_641	TR10B_HUMAN	0.492246	0.22758	-0.0901233	-0.129199	1.76713	0.431308	0.334406	0.0402237	0.842429	0.000619533	0.478764	0.344669	0.511805	-0.0841136	0.765325	0.280451
ec_642	PIGT_HUMAN	0.463041	-0.104667	0.149046	-0.175966	-0.335908	0.0263785	0.294318	0.0151482	-0.000676052	-0.030237	0.146704	0.000726523	-0.063049	0.175101	0.481938	-0.080364
ec_642	PIGT_HUMAN	0.626587	-0.0294338	0.166589	-0.114026	-0.233769	-0.0718221	0.87791	0.065039	0.178614	-0.0354142	0.194771	0.105993	-0.074139	0.259673	0.291783	-0.108632
ec_643	IRF2_HUMAN	0.093238	0.0424435	0.238818	-0.018256	-0.197363	0.0477904	0.210973	0.174619	-0.110217	0.218388	0.0563821	0.170585	-0.0978154	0.24722	0.316539	-0.298331
ec_643	IRF2_HUMAN	0.397044	-0.0709511	0.187343	0.0260582	-0.221665	0.103502	0.481713	0.129659	-0.20199	0.233687	0.0328707	0.233266	-0.237983	0.334262	0.550506	-0.299498
ec_644	ITB3_HUMAN	0.392805	-0.00333837	0.392751	-0.101542	0.136035	0.479325	0.623504	0.655816	0.199717	0.368815	0.290648	0.455511	0.079171	0.443628	0.178743	-0.180996
ec_644	ITB3_HUMAN	0.323556	0.0739825	0.490894	-0.116502	0.121131	0.6477	1.48216	1.06611	0.199065	0.478443	0.502569	0.566883	-0.0741446	0.445398	0.434804	-0.234751
ec_645	INS_HUMAN	0.0593615	-0.0945144	0.150342	0.0287405	-0.179788	0.0211213	-0.0301724	-0.103444	-0.0596109	-0.115774	0.239459	-0.261761	-0.145501	0.343921	0.108415	0.44725
ec_645	INS_HUMAN	0.126963	-0.108354	0.132836	0.00119777	-0.186963	0.0722928	-0.0779723	-0.0563923	-0.0733071	-0.154123	0.0459224	0.108395	-0.177907	0.502744	-0.0225813	0.346938
ec_646	RO52_HUMAN	0.16462	-0.181577	-0.0169658	0.10957	-0.379314	-0.107146	-0.368784	-0.14306	-0.183829	-0.298389	0.0382267	-0.278457	-0.387533	0.252264	0.0948767	0.222556
ec_646	RO52_HUMAN	-0.0700352	-0.246242	0.0328076	0.195626	-0.528798	-0.0509457	-0.0619368	-0.133244	-0.218389	-0.298265	0.0482289	-0.0756556	-0.451419	0.391437	0.216596	0.303732
ec_647	PRAF3_HUMAN	0.0997872	-0.195267	-0.0218355	-0.0139113	-0.284802	-0.222558	-0.36693	-0.180556	-0.0344327	-0.24187	-0.0142344	-0.433013	-0.0915752	0.134729	0.234512	0.0043326
ec_647	PRAF3_HUMAN	-0.176675	-0.0468128	0.113988	-0.0261633	-0.403475	-0.0734155	-0.117248	-0.105153	-0.0834794	0.0296274	0.123486	-0.28991	-0.287712	0.179389	0.250082	-0.0250618
ec_648	IL6_HUMAN	0.0860298	-0.000430067	0.310165	-0.0164202	0.0352939	0.243492	0.610327	0.299193	0.185063	0.00371905	0.413931	0.356305	0.0883237	0.47661	0.364875	0.0287181
ec_648	IL6_HUMAN	0.0276436	0.148159	0.464891	-0.094701	0.0325407	0.366773	0.888374	0.35841	0.369744	0.406484	0.599344	0.512621	0.0870325	0.603279	0.565971	0.0252085
ec_649	SLAF5_HUMAN	0.433918	0.00521652	0.311712	-0.219333	0.0172127	0.214644	1.00631	0.0830865	0.210781	0.0876533	0.180483	0.170469	-0.0706526	0.335101	0.0951097	0.0737882
ec_649	SLAF5_HUMAN	-0.0816964	0.0604124	0.146591	-0.213198	-0.114199	0.192366	0.889794	0.0669692	0.212249	0.157901	0.239086	0.0977474	-0.0502121	0.475494	0.337219	0.0237689
ec_650	MARK4_HUMAN	-0.0329842	-0.393606	-0.155427	0.43598	-0.768202	-0.174801	-0.909856	-0.260483	-0.310988	-0.571463	-0.284003	-0.1457	-0.748934	-0.08577	0.247452	0.55487
ec_650	MARK4_HUMAN	0.247203	-0.391642	-0.237346	0.524286	-0.916476	-0.186704	-0.777169	-0.29336	-0.42506	-0.573283	-0.2291	0.130643	-0.779572	0.0503226	0.409762	0.394452
ec_651	EPHA3_HUMAN	0.470749	-0.12258	0.0232731	0.0820211	-0.49257	-0.06545	-0.322971	-0.145137	-0.23404	-0.376838	0.0864344	-0.272533	-0.383573	0.216752	0.168349	0.0249155
ec_651	EPHA3_HUMAN	0.261173	-0.151546	0.0283778	0.149506	-0.545183	-0.0398334	-0.205329	-0.107845	-0.325909	-0.418667	-0.0126766	-0.184718	-0.476764	0.394232	0.247315	0.169552
ec_652	TPM2_HUMAN	-0.494264	-1.14484	-0.721034	-2.0434	-1.79587	-1.0247	0.259496	-0.377558	-1.40984	-0.381998	-1.28825	0.209951	-1.18949	-0.785213	-1.01411	-0.135958
ec_652	TPM2_HUMAN	-0.345143	-1.45568	-0.87957	-2.16243	-2.01495	-1.27788	0.53202	-0.559295	-1.00686	-0.044096	-1.1081	0.186796	-0.955836	-0.403237	-1.38166	-0.165367
ec_653	ACES_HUMAN	-0.5136	-0.904976	-0.664966	-2.06567	-1.03246	-0.807712	-0.0530555	-0.00613022	-0.313222	-0.552168	-0.869695	-0.291099	-0.530234	-0.536288	-1.11076	-0.943712
ec_653	ACES_HUMAN	-0.352203	-1.3835	-0.624243	-2.10891	-1.0854	-0.912916	-0.134657	-0.107796	-1.72263	-1.17186	-0.98973	-0.712679	-0.760145	-1.13921	-1.69689	-1.13506
ec_654	1433S_HUMAN	0.205151	-0.0682107	0.272708	0.245866	-0.22019	0.0204362	0.388402	-0.134042	0.583439	0.238979	0.0998401	0.0828754	-0.0388467	-0.0011967	0.350622	-0.155664
ec_654	1433S_HUMAN	0.0540014	-0.128654	0.294319	0.278743	-0.210624	0.0983085	0.475117	-0.509025	0.515264	0.185493	-0.113167	0.1538	-0.0449522	0.134179	0.35137	-0.00446721
ec_655	TNF14_HUMAN	0.194836	-0.0115865	0.220063	-0.027411	-0.0159355	0.0953921	0.101865	-0.0150554	0.0651192	-0.148196	0.187526	0.0111461	-0.172252	0.146469	0.175393	0.000713694
ec_655	TNF14_HUMAN	0.0664735	0.0198714	0.158787	-0.0444831	-0.00212991	0.127374	0.158388	0.0322615	-0.0494285	-0.12359	0.289586	0.182629	-0.0566209	0.287519	0.339944	0.0384469
ec_656	FCERB_HUMAN	0.126859	0.184582	0.0195901	-0.177346	0.336492	0.192512	0.00735813	0.00670535	0.135603	-0.0317431	0.162027	0.106629	0.241432	0.663674	0.0569406	-0.311793
ec_656	FCERB_HUMAN	0.0510147	0.363088	0.070211	-0.191551	0.300703	0.233384	0.066419	0.0313152	0.708396	0.379544	0.0210694	0.0166007	0.325232	0.596871	0.145696	-0.0115535
ec_657	FPR1_HUMAN	0.190816	-0.0672322	0.00641653	0.114407	-0.359105	-0.196758	-0.254633	-0.225118	-0.130123	-0.265754	0.0157982	-0.332322	-0.18282	0.248975	-0.00936637	-0.11776
ec_657	FPR1_HUMAN	0.317587	-0.162091	0.00762316	0.112738	-0.44999	-0.222776	-0.414969	-0.188398	-0.232553	-0.320947	-0.143841	-0.469636	-0.252891	0.125686	0.112553	-0.157367
ec_658	TNF14_HUMAN	0.111382	-0.698572	-0.269913	-0.407237	-1.21318	-0.294531	-0.437126	-0.260717	-0.768354	-1.00718	-0.237237	0.182209	-0.81538	-0.242885	0.043056	0.420773
ec_658	TNF14_HUMAN	0.140505	-0.726138	-0.251151	-0.313883	-1.29303	-0.404831	-0.401962	-0.540344	-0.405897	-0.958781	-0.233122	-0.0969139	-0.760786	-0.0622867	0.443845	0.466049
ec_659	CAH2_HUMAN	0.0920661	-0.452506	-0.212043	-0.403365	-0.486868	-0.174598	-0.190739	-0.0667622	-0.590479	-0.571235	-0.0343146	-0.12096	-0.392941	0.1124	-0.354634	-0.299119
ec_659	CAH2_HUMAN	0.187793	-0.458483	-0.174722	-0.390318	-0.572156	-0.147423	0.0102918	-0.0457685	-0.63168	-0.632182	-0.0156685	-0.309213	-0.43446	0.232202	-0.299369	-0.318704
ec_660	Q07826_HUMAN	0.15243	-0.210682	-0.0227278	0.280123	-0.422808	-0.188512	-0.421842	-0.169905	-0.158725	-0.35554	-0.0239344	-0.00424158	-0.318027	0.242455	0.177608	0.431263
ec_660	Q07826_HUMAN	0.302624	-0.231011	0.0296086	0.271677	-0.326201	-0.0558102	-0.296645	-0.163622	-0.239466	-0.438002	0.0432926	-0.2383	-0.443066	0.316441	0.134423	0.370528
ec_661	VDR_HUMAN	0.152651	-0.183733	0.0258246	0.259248	-0.365547	-0.0993446	-0.563376	-0.140683	-0.122559	-0.352635	0.0515773	-0.550316	-0.305782	0.267556	0.0768668	0.300133
ec_661	VDR_HUMAN	0.250904	-0.202559	0.04967	0.223939	-0.41477	-0.102082	-0.42028	-0.123547	-0.50273	-0.418786	-0.17611	-0.158265	-0.341035	0.357715	0.0793413	0.240367
ec_662	SGCA_HUMAN	0.176056	-0.168059	0.101213	0.0293683	-0.386652	-0.00600697	-0.227329	-0.191719	-0.178009	-0.27353	0.0883911	-0.452671	-0.287934	0.413215	0.1451	0.0548934
ec_662	SGCA_HUMAN	-0.204909	-0.20852	0.13536	0.092635	-0.322759	0.0127292	-0.0422272	-0.184659	-0.281977	-0.30244	0.133461	-0.29677	-0.291065	0.549333	0.17762	0.025676
ec_663	VILI_HUMAN	0.774455	0.0486497	0.00385733	-0.0954578	-0.191414	0.126803	0.0278298	-0.0496828	-0.0369491	-0.0484921	0.0517274	0.134562	-0.0737457	0.433237	0.701661	0.033528
ec_663	VILI_HUMAN	0.0998422	0.0539333	0.228133	-0.0946301	-0.226475	-0.0735012	0.660537	0.23281	-0.0419745	0.16959	0.077316	0.348188	-0.194263	0.667939	0.449121	0.00724462
ec_664	IMDH2_HUMAN	0.19304	-0.331281	-0.114906	0.37313	-0.514589	-0.196695	-0.542191	-0.212487	-0.150656	-0.455717	-0.102918	-0.293119	-0.51474	0.0996439	0.135786	0.624171
ec_664	IMDH2_HUMAN	0.131933	-0.339831	-0.0953214	0.397312	-0.724059	-0.265768	-0.513528	-0.194117	-0.323358	-0.550434	-0.133621	-0.126356	-0.574461	0.134919	0.208385	0.605511
ec_665	ROA1_HUMAN	0.196687	-0.340752	-0.0928806	0.430349	-0.471996	-0.18645	-0.572665	-0.224635	-0.165747	-0.47507	-0.0822645	-0.706843	-0.493898	0.0933317	0.0438847	0.593212
ec_665	ROA1_HUMAN	0.141972	-0.321111	-0.0556408	0.399709	-0.58258	-0.176781	-0.583058	-0.20329	-0.228848	-0.50125	-0.134083	-0.0829879	-0.576332	0.109629	0.217053	0.600376
ec_666	GSHB_HUMAN	0.0583917	0.195836	0.177201	-0.365681	-0.154115	0.0867117	0.418282	0.0917427	0.116237	0.171246	0.237634	0.0751416	-0.175287	0.244537	0.224557	0.104715
ec_666	GSHB_HUMAN	0.176903	0.490347	0.371043	-0.318134	-0.139443	0.141967	0.609946	0.0212386	0.263864	0.14355	0.278613	0.314947	-0.1854	0.407176	0.262921	0.217152
ec_667	RBP2_HUMAN	0.0456492	0.385063	0.114562	-0.540479	-0.131071	0.231575	0.760293	1.05236	0.0245193	0.408216	0.270736	0.246367	-0.0142394	0.418209	0.220417	0.0321267
ec_667	RBP2_HUMAN	0.221343	0.384413	0.696402	-0.545378	-0.137938	0.208214	0.785405	1.12236	-0.0489144	0.363343	0.339169	0.28787	-0.109018	0.85386	0.226306	0.422577
ec_668	HMGA1_HUMAN	0.825804	0.0837213	0.0923664	-0.246028	-0.257419	0.0560265	-0.0148801	-0.00861015	0.616325	0.159342	0.15964	-0.125846	-0.130114	0.193759	0.273735	-0.0861048
ec_668	HMGA1_HUMAN	0.265201	0.164373	0.261102	-0.227687	-0.26756	0.0364191	0.318452	-0.0239544	0.351602	0.152131	0.0397508	-0.301562	-0.226028	0.278507	0.341475	0.162386
ec_669	IGF1_HUMAN	-0.357507	0.426132	0.363023	-0.140615	-0.171958	2.65572	0.655129	0.324409	0.439603	0.143172	0.0523896	0.122608	-0.0876526	-0.0115038	0.109631	-0.203946
ec_669	IGF1_HUMAN	0.0788543	0.781943	0.521552	-0.116241	-0.533678	2.29789	0.907391	0.503798	0.538071	0.202672	0.171329	0.390366	-0.189546	0.0312385	1.02521	0.0868332
ec_670	THYG_HUMAN	-3.11762	2.04028	-1.9751	-0.0759045	1.93987	0.209836	-1.30676	-0.249692	-0.00491503	1.18947	-0.394845	1.92865	0.797944	-2.25788	-2.48855	0.305225
ec_670	THYG_HUMAN	-3.02374	1.778	-2.07344	-0.0211588	1.80369	0.171946	-1.12131	-0.223177	0.209556	1.12791	-0.552993	2.03859	0.900883	-2.18031	-2.46332	0.0724636
ec_671	LYAM2_HUMAN	-2.16379	1.4721	-1.35396	-1.24427	1.49701	0.0342386	-0.888007	-0.300771	0.165249	0.885517	0.312501	1.62493	1.09572	-1.57121	-2.36396	0.0661658
ec_671	LYAM2_HUMAN	-2.35782	1.53575	-0.947593	-1.31917	1.53218	0.163216	-0.757964	-0.233858	0.100075	0.836343	0.309366	1.39248	1.29173	-1.46925	-1.87066	0.178393
ec_672	IL4_HUMAN	0.889478	-0.291201	-0.00713724	0.868636	-0.143441	-0.382369	-0.0193632	0.0133463	0.202472	-0.156784	-0.170411	-0.378311	-0.280422	-0.17252	0.266092	-0.214173
ec_672	IL4_HUMAN	0.643165	-0.217537	-0.201104	0.77252	-0.257898	-0.268796	-0.0598237	0.0872963	0.0495636	-0.315381	-0.216226	-0.352826	-0.263165	-0.238029	0.452288	-0.210008
ec_673	MUC2_HUMAN	-0.106841	0.912434	0.167964	0.343452	0.257019	-0.0686096	-2.29582	0.487073	0.963763	-0.0530515	-0.102016	0.0304592	0.37195	-1.29351	-1.57659	-0.675834
ec_673	MUC2_HUMAN	0.0709517	1.03462	0.0298368	0.256078	0.205657	-0.0530243	-2.34877	0.485208	0.908324	-0.141621	-0.0169353	0.110126	0.216345	-1.22095	-1.74164	-0.401889
ec_674	IL1B_HUMAN	-0.0282097	-0.240339	-0.1561	0.0874606	-0.0259478	-0.186767	0.246872	0.0279748	0.0062036	0.0106389	-0.0206962	-0.0192391	0.0442753	-0.136617	-0.00124774	-0.16197
ec_674	IL1B_HUMAN	0.0947746	-0.112944	-0.0915942	0.148015	-0.124334	-0.246354	0.283375	0.342552	0.114861	-0.0411078	0.0116117	-0.0787308	-0.0217996	-0.112517	0.112315	-0.148404
ec_675	TNFB_HUMAN	0.586528	0.0144671	0.139143	0.0263428	-0.539615	-0.0137807	0.524106	-0.0288803	-0.102021	-0.193267	0.0434639	-0.172352	-0.202748	-0.0287479	0.624067	-0.261569
ec_675	TNFB_HUMAN	0.966047	0.134625	0.0681778	-0.0358452	-0.592291	-0.0830269	1.09381	0.583002	-0.113459	-0.128342	0.109749	-0.0927044	-0.191311	-0.0350197	0.709396	-0.229189
ec_676	IL2_HUMAN	-0.0859784	-0.379089	-0.00151021	0.0596896	-0.0553543	-0.196358	-0.185084	-0.208637	-0.194236	0.0282052	-0.108904	-0.00329384	0.117134	-0.0536136	-0.137696	-0.425188
ec_676	IL2_HUMAN	-0.0889956	-0.395562	-0.150289	0.0908266	-0.0796144	-0.261683	-0.296262	-0.207771	0.046678	0.107916	-0.129239	0.0290184	0.0539189	-0.0968843	-0.0638266	-0.487971
ec_680	na	-0.124502	-0.446165	-0.531389	0.189881	-0.114935	-0.448706	-1.49647	-0.364846	-0.141511	-0.346834	-0.529243	-0.433176	-0.429308	-1.04814	-0.175184	-0.516035
ec_680	na	-0.118741	-0.789608	-0.585164	0.165451	-0.284629	-0.597881	-1.6379	-0.392432	-0.22326	-0.32479	-0.785373	-0.522457	-0.463829	-1.1683	-0.200356	-0.501314
ec_683	na	-0.251232	0.598526	-0.536066	-0.819715	1.34644	3.32088	-0.269481	0.82665	2.81892	1.7372	-0.892338	-0.770108	1.06029	-2.63274	0.504894	-0.441176
ec_683	na	-0.916103	0.674459	-0.497605	-1.02268	1.29447	3.45031	-0.462975	0.688783	3.62674	1.79833	-0.893032	-0.976322	1.33871	-2.69299	0.593769	-0.205017
ec_687	na	0.226309	0.00546418	-0.0527601	0.534426	0.363516	4.4166	-0.21251	0.0542297	-0.0612719	-1.24849	0.560985	-0.130692	0.138588	1.17155	-1.05013	1.30708
ec_687	na	-0.555272	-0.355018	-0.0596541	0.634845	0.433678	4.3801	-0.584964	0.060585	0.210967	-1.09654	0.46798	0.0999276	0.0768252	1.27023	-0.848811	1.1112
ec_693	na	-0.2167	-0.0435017	1.20845	-0.0382304	-0.285861	-0.0817332	0.345207	-0.448521	0.104814	0.0662739	0.109986	-0.00233706	-0.261814	0.451114	-0.0869725	-0.313914
ec_693	na	-0.453562	0.164671	0.159064	-0.0145571	-0.357014	-0.0733607	0.433437	-0.406911	0.0555096	0.0737256	0.185317	0.18878	-0.347016	0.37153	0.0741487	-0.350936
ec_701	CASPA_HUMAN	-0.00281542	0.460973	0.17797	-0.0538356	0.0683997	-0.03105	0.936376	0.135828	0.052831	0.0367894	0.204778	0.0507476	-0.00718943	0.00408159	0.0407065	-0.0134721
ec_701	CASPA_HUMAN	-0.00834693	0.172376	0.0337655	0.0371313	-0.0490104	-0.00616845	0.527071	0.113998	0.0490796	-0.00439889	0.251101	-0.00890845	-0.0818777	0.00859046	0.198568	-0.0481038
ec_703	VEGFA_HUMAN	-2.71806	1.97409	-2.18757	-1.54189	2.98206	0.788257	-0.0818724	-0.0448127	0.12179	1.59971	0.356827	2.05515	1.92519	-2.15822	-3.1623	0.496003
ec_703	VEGFA_HUMAN	-2.93842	2.06913	-2.64321	-1.70842	3.271	0.684597	-0.716256	0.221984	0.400474	1.08627	0.466414	2.16111	2.25354	-1.986	-3.51512	0.642222
ec_704	CSF2_HUMAN	-0.0160801	0.112613	0.0282031	-0.0738599	0.124773	0.0742722	0.048918	-0.0481764	0.0258537	-0.274183	0.12051	-0.0463345	0.0320494	-0.141718	0.616141	-0.181001
ec_704	CSF2_HUMAN	0.170699	0.277025	0.593706	-0.0614296	0.133983	0.0532351	0.124309	-0.0363771	-0.0690962	0.0517061	0.172276	0.00516131	0.0468997	0.196528	0.49122	0.276559
ec_705	IFNA1_HUMAN	0.154335	1.74205	0.278364	0.0201895	0.272368	-0.266582	1.06849	0.352907	0.479064	0.24924	0.635615	0.655505	-0.0678875	-0.152332	0.374299	0.0653728
ec_705	IFNA1_HUMAN	-0.103901	1.80725	0.249816	0.284961	0.20043	-0.257027	0.930599	0.344167	0.516081	0.270108	0.499738	0.697346	0.0368163	-0.0281503	0.529096	0.660721
ec_710	IL1A_HUMAN	-0.230542	0.293249	-0.894014	-3.0802	-0.0936271	-0.209004	-0.456316	0.0336326	0.866626	-0.476764	-0.266453	0.034845	-0.0437742	-1.74651	-1.86136	0.19535
ec_710	IL1A_HUMAN	0.0993238	0.42378	-0.98652	-2.67226	-0.292168	-0.178722	-0.295136	0.336954	1.05099	-0.756599	-0.415073	0.198731	-0.131257	-1.92648	-2.15704	0.254242
ec_711	IL1B_HUMAN	-0.00407503	-0.113512	-0.163331	0.0533005	-0.407224	-0.281666	-0.367341	-0.199748	-0.11386	-0.342224	-0.24689	-0.268411	0.0849009	-0.305909	-0.0463389	0.0632692
ec_711	IL1B_HUMAN	0.0693274	-0.00932679	-0.312497	-0.0285448	-0.409809	-0.374206	-0.385141	-0.232633	0.0143468	-0.20584	-0.274621	-0.240029	-0.101675	-0.225982	0.0811275	0.00454518
ec_712	IL4_HUMAN	-0.238263	-0.14499	0.248581	0.321224	-0.00864417	-0.199453	0.218793	-0.164304	-0.124874	-0.0900619	-0.00854658	0.0719945	-0.214321	0.162084	0.685725	-0.0943326
ec_712	IL4_HUMAN	0.162053	-0.0270574	0.130342	0.37523	-0.113005	-0.107148	0.530616	0.0124849	-0.0607696	-0.0155252	-0.0512613	0.100451	-0.201281	0.0435264	0.469488	-0.132071
ec_713	IL6_HUMAN	-1.02047	0.390729	-0.0215788	1.22984	1.53525	-0.574014	-1.00415	-0.988054	1.1381	0.502321	-0.299151	-0.876897	0.686383	-1.53017	-0.895717	-0.876298
ec_713	IL6_HUMAN	-0.854298	0.56866	0.0701913	1.25127	1.58115	-0.700905	-0.960583	-1.1465	1.09801	0.523487	-0.30036	-1.13585	0.81472	-1.9331	-0.97169	-0.727566
ec_714	IL8_HUMAN	0.141356	-0.251148	-0.168238	0.403413	-0.338969	-0.468818	-1.08432	-0.419715	-0.204722	-0.483107	-0.462507	-0.764871	-0.193987	-0.0142411	-0.091204	0.288944
ec_714	IL8_HUMAN	0.257954	-0.302363	-0.190724	0.378581	-0.384937	-0.316967	-0.957283	-0.373848	-0.426966	-0.665708	-0.186855	-1.15126	-0.389211	0.130241	-0.113096	0.0919195
ec_715	IL10_HUMAN	0.200064	-0.0681369	0.25394	0.211342	-0.683251	0.0887899	0.505699	-0.15323	-0.0385661	-0.308406	0.513829	0.0415818	-0.218723	0.470983	0.323227	0.498841
ec_715	IL10_HUMAN	0.255061	0.00424403	0.290332	0.190152	-0.45238	0.11107	0.653665	-0.138663	-0.0529594	-0.330879	0.532179	0.679046	-0.253038	0.556048	0.330938	0.429951
ec_716	IL12A_HUMAN	-0.102786	0.397114	-0.072531	-0.0586795	-0.103508	-0.342298	0.311769	-0.252747	0.0375367	-0.283494	0.0513608	0.00803565	-0.0598335	-0.195423	0.235217	-0.19224
ec_716	IL12A_HUMAN	-0.33498	-0.00316073	0.0167861	-0.0279834	-0.192403	-0.345137	0.196538	-0.23111	0.286225	-0.306492	0.119025	-0.0563709	-0.298131	-0.0933278	0.239166	-0.223318
ec_717	IL15_HUMAN	-0.0418382	-0.0776635	-0.0727632	-1.48009	0.229378	-0.343223	0.181504	0.354732	-0.00310187	-0.318913	0.198722	0.188092	-0.143174	-0.031594	-1.3287	-0.357662
ec_717	IL15_HUMAN	-0.296515	-0.0854723	0.0798025	-1.28082	0.401425	-0.303386	0.306017	0.387347	0.268393	0.050636	0.223878	0.377975	-0.221046	0.0144694	-0.992202	-0.366716
ec_720	MUC1_HUMAN	1.02961	0.991066	0.0875407	-0.15586	0.900621	0.367268	1.01424	0.449009	0.53602	1.33151	0.372446	0.859433	0.698533	0.798949	0.403458	0.240267
ec_720	MUC1_HUMAN	0.783842	1.14202	0.0965732	-0.164763	0.963834	0.357473	1.04722	0.390567	0.564212	1.23325	0.431535	0.944512	0.890051	1.05049	0.59007	0.194675
ec_721	MMP7_HUMAN	-0.234881	-0.137609	-0.141556	-0.543112	0.230257	0.0378479	-0.176101	-0.00831758	-0.130484	-0.150742	0.0618709	-0.121727	0.202332	0.0193684	-0.302368	0.0206127
ec_721	MMP7_HUMAN	-0.302614	-0.171085	-0.176753	-0.574737	0.144561	0.0372786	-0.0748299	0.0622877	-0.0246107	-0.0838527	0.0875062	-0.0545615	0.156562	-0.00281223	-0.142518	0.0603234
ec_730	TRFE_HUMAN	-0.293331	0.274456	1.03722	1.62943	-0.862175	2.31831	-0.105434	-2.97658	-0.308889	0.494039	0.428363	2.74107	-0.563336	-0.104048	4.08105	2.40534
ec_730	TRFE_HUMAN	-0.330059	0.198876	0.895229	1.68915	-0.877445	2.27286	-0.068322	-2.98944	-0.345299	0.293131	0.331007	2.58312	-0.503511	-0.182033	3.98292	2.48284
ec_732	IFNG_HUMAN	-2.19998	1.60034	-1.00793	-0.934405	1.51776	0.304551	-0.156966	0.116634	-0.00133804	0.863414	0.365363	1.64359	0.911466	-0.91857	-2.01911	0.319994
ec_732	IFNG_HUMAN	-1.92952	1.55732	-1.04265	-1.03538	1.69645	0.455799	-0.223352	0.0952176	0.0867006	0.740275	0.447181	1.57536	0.887774	-0.912885	-1.9794	0.378019
ec_734	IL2_HUMAN	-0.553276	0.307077	0.226239	0.0767085	0.0990704	-0.127333	0.457623	0.16392	0.149784	0.287928	0.249512	0.517561	-0.233214	0.322193	0.0241031	0.00310222
ec_734	IL2_HUMAN	-0.507228	0.730247	0.531826	0.0728774	0.112101	-0.0316024	0.678263	0.251403	0.187621	0.175606	0.306801	0.580772	-0.185297	0.610422	0.247193	0.0422081
ec_735	KLK3_HUMAN	0.221059	1.38859	1.08846	1.64698	-0.080395	1.24005	3.87185	0.970383	0.525281	0.755401	2.00192	2.15068	0.0847612	1.13649	2.52152	1.06689
ec_735	KLK3_HUMAN	0.321958	1.53863	1.14449	1.70803	0.0844241	1.39162	3.70985	0.521906	0.428742	0.778933	2.13641	2.14813	0.107073	1.2886	2.72423	1.14756
ec_736	TOP2A_HUMAN	-0.300006	-0.352173	-0.244097	-0.0697648	-0.045917	-0.260704	-0.579178	-0.294364	-0.00616778	-0.143771	-0.236134	-0.223348	0.0372759	-0.548826	-0.401118	-0.193823
ec_736	TOP2A_HUMAN	-0.190576	-0.435143	-0.317028	-0.0651339	-0.100365	-0.261728	-0.413852	-0.206162	-0.0530435	-0.116605	-0.270351	-0.234058	-0.024201	-0.46641	-0.272835	-0.193446
eg_003	IL2_HUMAN	-0.0414706	-0.487535	-0.357377	0.368841	-0.55593	-0.318996	-0.963617	-0.299004	-0.328991	-0.595477	-0.284731	-0.286737	-0.642523	-0.00577879	0.053334	-0.0851922
eg_003	IL2_HUMAN	0.0766931	-0.484306	-0.325815	0.417233	-0.595081	-0.209515	-0.956103	-0.300248	-0.389726	-0.628952	-0.266057	0.0116746	-0.762887	0.0619116	0.284037	0.122296
eg_004	IL4_HUMAN	-0.112156	-0.524434	-0.267938	0.347067	-0.525728	-0.265858	-0.824193	-0.254327	-0.267423	-0.551781	-0.181366	-0.288779	-0.51672	0.105434	0.0111571	0.195892
eg_004	IL4_HUMAN	-0.145667	-0.513189	-0.236353	0.377382	-0.633833	-0.219839	-0.642882	-0.265986	-0.378841	-0.567628	-0.200556	-0.0112239	-0.609815	0.177565	0.17825	0.0823918
eg_005	IL5_HUMAN	0.04373	-0.454717	-0.197878	0.35822	-0.453828	-0.276096	-0.72542	-0.351316	-0.197691	-0.55972	-0.0746938	-0.331718	-0.483512	0.0924971	0.0420004	0.318185
eg_005	IL5_HUMAN	-0.0322553	-0.468159	-0.186982	0.44026	-0.547692	-0.288033	-0.710966	-0.348873	-0.314521	-0.577392	-0.0835172	-0.243238	-0.532755	0.154238	0.229294	-0.0954703
eg_008	IL10_HUMAN	0.0805838	0.365287	0.330815	-0.0211312	-0.209183	-0.464214	0.156502	0.27556	0.171475	-0.476892	0.00444094	-0.346355	-0.113367	-0.228936	0.353009	0.0826135
eg_008	IL10_HUMAN	0.165046	0.530167	0.478269	0.00540824	-0.39989	-0.389343	0.890484	-0.376284	0.076807	-0.104207	0.0188157	-0.0124714	-0.207898	-0.2176	0.647969	0.380815
eg_009	IL12A_HUMAN	0.174881	-0.2447	0.000834692	0.270632	-0.397924	-0.172906	-0.331818	-0.276692	-0.216758	-0.480346	0.216738	-0.0785606	-0.30146	0.362792	0.120419	0.499094
eg_009	IL12A_HUMAN	0.200422	-0.306966	0.00551628	0.326017	-0.459709	0.003791	-0.235627	-0.222414	-0.266479	-0.503036	0.222175	0.267658	-0.349917	0.446249	0.237044	0.437726
eg_011	IFNG_HUMAN	0.0236116	-0.185654	0.197493	0.184772	-0.396786	-0.022486	0.0602987	-0.447364	-0.164794	-0.40774	0.399396	0.264635	-0.355708	0.45145	0.268533	0.0946573
eg_011	IFNG_HUMAN	0.164675	-0.20785	0.228369	0.195834	-0.456682	0.0328084	0.22976	-0.419931	-0.275383	-0.423219	0.392282	0.13316	-0.330974	0.341145	0.335232	-0.143824
eg_012	TNFA_HUMAN	0.138028	-0.355136	-0.140441	0.408252	-0.520206	-0.140669	-0.623988	-0.226286	-0.214327	-0.512012	-0.0297452	-0.296729	-0.411656	0.0982376	0.193466	0.665136
eg_012	TNFA_HUMAN	0.262512	-0.399729	-0.107617	0.419187	-0.474351	-0.0619984	-0.638371	-0.23265	-0.311774	-0.600235	-0.285026	-0.0647715	-0.461375	0.0998106	0.285178	0.561691
eg_013	VCAM1_HUMAN	-0.0045561	-0.192457	0.0816928	0.280211	-0.420281	-0.146956	-0.35027	-0.391626	-0.208119	-0.439177	0.143708	-0.186836	-0.279395	0.294633	0.068909	0.0439778
eg_013	VCAM1_HUMAN	0.266912	-0.129669	0.136498	0.208561	-0.356118	-0.0983206	-0.341921	-0.293037	-0.18331	-0.468602	0.071197	-0.550122	-0.392318	0.223084	0.153483	-0.282142
eg_015	CCL11_HUMAN	0.803255	-0.563996	0.0179415	0.651389	-0.452825	-0.350326	-0.70495	-0.236329	-0.0212229	-0.700163	-0.418707	-0.687749	-0.0953855	-0.94112	0.952771	-0.721898
eg_015	CCL11_HUMAN	0.480177	-0.546032	-0.0477261	0.773123	-0.589732	-0.359137	-0.72667	-0.30495	-0.283249	-0.439381	-0.491129	-0.646258	-0.363305	-0.93271	1.15941	-0.702372
eg_018	ADO_HUMAN	1.87131	0.571854	-1.70859	1.86746	-2.54767	-3.78786	-2.24867	-0.30282	-2.28218	-4.15059	-0.283225	-3.92095	-2.94948	-5.08072	1.60862	-5.2614
eg_018	ADO_HUMAN	2.93815	0.393042	-1.61363	1.97869	-2.64182	-3.8846	-2.20208	-0.390878	-2.67056	-2.38683	-0.592896	-4.17285	-3.32506	-5.40743	1.7698	-5.31311
eg_019	GELS_HUMAN	0.260053	-0.302643	-0.060255	0.0702928	-0.307681	-0.360388	-0.311993	-0.445292	0.0152303	-0.323085	-0.242011	-0.726133	-0.3131	-0.903718	0.254056	-0.379178
eg_019	GELS_HUMAN	0.422469	-0.334611	-0.026951	0.0549695	-0.300673	-0.257923	-0.318537	-0.422199	-0.000233889	-0.370807	-0.182955	-0.622486	-0.337834	-0.507434	0.302546	-0.43773
eg_020	S10A6_HUMAN	-0.0995875	0.0405622	-0.254593	0.116892	-0.0675805	-0.077474	-0.380869	0.0597198	-0.185934	0.125446	-0.237186	0.377363	-0.258934	0.343718	0.148033	0.631572
eg_020	S10A6_HUMAN	0.0853104	0.319766	-0.0649204	0.214634	0.0935501	-0.110854	-0.160177	0.457478	-0.185501	0.241744	-0.0172711	0.282539	0.0741092	0.283966	0.111828	0.543798
eg_020	S10A6_HUMAN	0.00454216	-0.0496333	-0.335347	0.24264	-0.441853	-0.114492	-0.0818596	0.490081	0.00737429	0.221352	-0.230599	0.478144	-0.362841	0.510885	0.414009	0.879114
eg_020	S10A6_HUMAN	0.152527	0.426965	0.0200659	0.349448	-0.10362	-0.066503	0.030066	0.536429	-0.0378537	0.239672	0.0536439	0.258762	-0.0613115	0.290871	0.2076	1.09243
eg_021	CATD_HUMAN	4.01466	4.73214	4.16921	4.61988	3.42081	3.49818	7.23697	5.55162	3.75966	2.83683	5.25066	4.86984	2.26357	0.917541	5.54077	2.38024
eg_021	CATD_HUMAN	2.96027	5.23612	4.79256	4.71698	3.74189	3.60267	6.34105	5.12673	3.8905	2.69309	6.21987	5.08222	2.64106	0.972779	5.57781	2.77961
eg_022	AGR2_HUMAN	0.408332	-0.384602	-0.112891	0.593857	-0.472704	-0.263275	-0.739144	-0.118894	0.479635	0.0752618	-0.365046	-0.103838	-0.0673768	-0.346699	0.123463	0.620552
eg_022	AGR2_HUMAN	0.214245	-0.388183	-0.114585	0.606316	-0.581543	-0.200011	-0.718378	-0.272648	0.593839	0.0266084	-0.341947	-0.0367719	-0.156705	-0.273796	0.397135	0.765828
eg_023	TNAP3_HUMAN	0.237462	-0.300966	-0.142757	0.275196	-0.504709	-0.224119	-0.708266	-0.416745	-0.201988	-0.498123	-0.406133	-0.950399	-0.452449	-0.166403	0.0736124	-0.00318282
eg_023	TNAP3_HUMAN	0.424486	-0.220464	-0.0981317	0.243932	-0.506212	-0.283574	-0.616995	-0.37945	-0.417614	-0.59848	-0.0230221	-0.814548	-0.526011	-0.193494	0.14439	-0.207688
eg_024	CAD13_HUMAN	0.390308	1.4633	-0.136206	-0.179235	0.0638659	2.18052	0.0148875	0.835029	1.29389	-0.34641	-0.103718	-0.352874	-0.283203	-1.70912	0.45404	0.469794
eg_024	CAD13_HUMAN	0.0523086	1.92671	-0.178042	-0.164639	-0.130335	2.76693	-0.211262	0.611717	1.24051	-0.294779	-0.188905	-0.48694	-0.268205	-2.09804	1.27355	0.323613
eg_025	GSTP1_HUMAN	0.617698	0.343329	0.314133	1.51557	-0.74377	1.27144	-0.982719	-0.325967	-0.452361	1.2492	2.87898	4.0277	0.50934	-0.75131	4.10188	2.73681
eg_025	GSTP1_HUMAN	0.543913	0.490436	0.318772	1.57853	-0.82956	1.27542	-1.01144	-0.431734	-0.51679	1.26179	2.92672	4.08507	0.502023	-0.72309	4.11871	2.67975
eg_026	RUNX3_HUMAN	0.175817	-0.0391157	0.00256909	0.0587	0.177582	2.00516	0.0996508	0.138067	-0.076532	-0.19572	0.056401	-0.0999477	-0.061596	0.0517958	0.0497799	-0.0825639
eg_026	RUNX3_HUMAN	0.187671	0.10966	-0.00312217	0.0971331	0.0952974	1.79508	-0.0411795	0.342104	0.0869877	-0.199115	0.028031	-0.142789	-0.0740911	0.106243	-0.0984551	-0.0109691
eg_027	TFPI2_HUMAN	-2.68624	2.16675	-2.1227	-2.57258	3.60215	0.278502	-1.85854	-0.0428902	0.69758	1.25477	1.06987	2.6846	2.58357	-2.90487	-2.44734	-0.227062
eg_027	TFPI2_HUMAN	-2.95408	2.12766	-2.00456	-2.60232	2.93379	0.254772	-1.68396	0.000269678	0.864681	1.55274	1.42444	2.78211	2.12813	-3.14957	-2.74759	-0.128959
eg_028	PAI1_HUMAN	-0.295119	-0.190066	-0.165806	-0.0194223	0.186377	-0.0201186	-0.215272	0.00462308	-0.060521	-0.068747	0.0683781	-0.006152	0.139582	-0.0301727	-0.245334	-0.117585
eg_028	PAI1_HUMAN	-0.363203	-0.206401	-0.16956	-0.0288776	0.128918	0.0362553	-0.143378	-0.0977514	-0.0639017	-0.0310065	0.127698	-0.0112107	0.118257	-0.0673793	-0.138543	-0.101811
eg_029	BAX_HUMAN	-0.119604	0.0298716	0.45211	0.0581428	-0.0718421	-0.293285	1.20119	0.0492922	0.121836	0.0306365	0.233244	0.512151	-0.275402	-0.0418285	0.411819	-0.111499
eg_029	BAX_HUMAN	-0.0644725	0.137855	0.528743	0.0353315	-0.0294365	-0.102898	1.19662	0.0852221	0.0798102	0.0956933	0.424584	0.640372	-0.131159	0.119274	0.636378	-0.230075
eg_030	BNIP3_HUMAN	0.0321162	-0.016006	0.333317	0.135189	-0.20013	-0.792592	0.842664	0.104028	-0.0629389	0.0663643	-0.00212284	0.169816	-0.119774	-0.0555659	0.382566	-0.214231
eg_030	BNIP3_HUMAN	0.322403	0.0325405	0.293067	0.128851	-0.208065	-1.08543	1.33192	0.00203341	-0.169169	0.316643	0.146705	0.21503	-0.303658	0.0244826	0.440752	-0.236187
eg_031	CAC1G_HUMAN	0.228212	-0.351065	-0.179744	0.370947	-0.46206	-0.308625	-0.922797	-0.440707	-0.239381	-0.468325	-0.203996	-1.05048	-0.338588	0.103821	-0.0174805	0.236363
eg_031	CAC1G_HUMAN	0.246398	-0.404247	-0.134054	0.404508	-0.498306	-0.306043	-0.709396	-0.252838	-0.390471	-0.523129	-0.0970047	-0.374974	-0.55258	0.173323	0.0773744	0.116016
eg_032	CDN1C_HUMAN	-0.272175	1.54635	0.0306558	-0.169769	0.0795365	0.259471	0.464703	0.011421	1.52366	-0.0354517	0.061424	0.264487	0.136728	-1.28534	-0.686608	-0.21279
eg_032	CDN1C_HUMAN	-0.331617	1.73862	-0.0501305	-0.145963	0.097274	0.313663	0.511257	0.374747	1.56205	0.104951	0.133479	0.368418	0.0751546	-1.40938	-0.993193	0.0276615
eg_033	CD2A2_HUMAN	-0.330199	-0.122568	0.0409962	-0.00971416	-0.114312	-0.529035	0.348868	-0.15924	-0.080479	-0.107822	0.12305	0.142126	-0.105147	-0.0959134	-0.0632253	-0.134804
eg_033	CD2A2_HUMAN	-0.189256	-0.159692	-0.00995581	-0.0445841	-0.14563	-0.534916	0.700273	-0.119181	0.107538	0.0295821	0.274421	0.290976	-0.212395	0.130306	0.150095	-0.0983571
eg_034	BRCA1_HUMAN	2.02455	1.20965	1.13791	1.39359	0.473787	1.06416	1.19863	1.06481	0.600253	0.376227	1.03429	0.818611	0.563581	1.05909	1.95683	1.62178
eg_034	BRCA1_HUMAN	1.49119	1.20297	1.379	1.62376	0.437391	1.13393	1.33741	0.997154	0.664478	0.180723	1.13073	0.8774	0.457398	1.25081	2.16323	1.63691
eg_036	DAPK1_HUMAN	0.2079	-0.350428	-0.140016	0.436895	-0.421826	-0.184013	-0.609602	-0.233874	-0.177527	-0.45082	-0.0140502	-0.128968	-0.380258	0.0192912	0.0973367	0.697993
eg_036	DAPK1_HUMAN	0.329349	-0.341613	-0.126983	0.413287	-0.576931	-0.159826	-0.708567	-0.262633	-0.191844	-0.459846	-0.126217	-0.103541	-0.485142	0.0773044	0.189842	0.510292
eg_037	DKK1_HUMAN	0.153721	-0.535295	-0.259555	0.418791	-0.375194	-0.305046	-1.00382	-0.293316	-0.20841	-0.536254	-0.354765	-0.511112	-0.698095	-0.132749	0.0550153	0.0944357
eg_037	DKK1_HUMAN	0.0219947	-0.535846	-0.330617	0.475706	-0.53935	-0.219351	-1.51933	-0.355162	-0.398228	-0.596251	-0.331883	-0.358902	-0.716716	-0.0882104	0.205218	0.16343
eg_038	DKK2_HUMAN	0.166747	-0.246203	-0.00672047	0.118647	-0.0394297	0.345221	-0.483325	0.0533316	0.421061	-0.101827	0.127733	-0.036676	-0.0477856	-0.252026	-0.326474	-0.149157
eg_038	DKK2_HUMAN	0.272716	-0.306128	-0.000790887	0.138811	-0.0854877	0.230717	0.94087	0.0227127	0.458873	-0.0555509	0.153016	-0.0381791	-0.0993013	-0.266684	-0.152604	-0.111506
eg_039	DKK3_HUMAN	0.812852	-0.134801	-0.188762	-1.93258	0.734606	-0.541787	0.112692	-0.289655	-0.0504329	-1.39359	1.61741	-1.22254	1.52211	-1.67981	-1.62839	-1.81951
eg_039	DKK3_HUMAN	0.613815	-0.29047	-0.095018	-2.30859	0.823989	-0.329868	0.336768	-0.254015	0.0878797	-1.37067	1.85084	-1.30388	1.64329	-1.65132	-1.82116	-1.95244
eg_040	MGMT_HUMAN	-0.110422	-0.0544367	-0.0490384	0.241734	-0.046983	-0.906758	-0.122675	-0.138985	0.245393	-0.0589118	-0.00849017	0.0445858	-0.0988705	-0.596647	0.111299	-0.131116
eg_040	MGMT_HUMAN	-0.0320257	0.0371599	0.00858531	0.240491	-0.0787017	-1.0296	0.0854256	-0.0949395	0.0518544	-0.0185572	0.076884	0.127572	-0.149059	-0.449449	0.181989	-0.0818302
eg_041	PTEN_HUMAN	-1.53547	1.00793	-0.762137	-0.698071	0.420413	0.392918	-0.102717	0.0374602	-0.120836	0.483067	0.00866148	0.388253	0.67334	-0.267577	-1.84527	-0.12474
eg_041	PTEN_HUMAN	-1.71295	1.25968	-1.05426	-0.767241	0.839635	-0.00623948	-0.00768152	0.17623	0.0469061	0.170435	0.0772303	0.385529	0.413481	-0.210235	-1.87403	-0.0195833
eg_042	SFRP1_HUMAN	0.212309	-0.262383	-0.0984148	-0.014768	-0.404325	-0.285726	-0.426107	-0.204225	-0.113168	-0.170384	-0.23362	-0.61684	-0.156691	-0.269267	0.110602	-0.177428
eg_042	SFRP1_HUMAN	0.274833	-0.0772386	-0.0685841	-0.0302398	-0.533446	-0.260646	-0.342495	-0.20709	-0.100222	-0.207947	-0.334632	-0.638534	-0.323818	-0.0942424	0.316546	-0.509285
eg_043	TIMP3_HUMAN	0.554187	0.205618	0.166624	0.254507	-0.0247286	-0.811199	-0.190331	-0.320175	0.00798102	0.0606442	0.214762	-0.369604	-0.272297	-0.425456	0.410659	0.0825852
eg_043	TIMP3_HUMAN	1.34117	0.553446	0.131022	0.422459	-0.0838	-0.709014	-0.0777334	-0.22967	0.151616	-0.597028	0.305476	-0.267527	-0.275986	-0.466117	0.548311	0.245466
eg_044	ZO2_HUMAN	0.610489	0.0664004	0.0382832	-0.0886441	-0.148823	-0.261043	0.469773	-0.117097	-0.0130507	-0.30366	-0.063294	-0.437846	-0.329378	0.00823358	0.742366	-0.135215
eg_044	ZO2_HUMAN	0.715918	0.0116111	0.447928	-0.0384308	-0.480307	-0.167758	0.5093	-0.0557819	-0.0749005	0.0140815	0.0159068	0.034829	-0.228082	-0.0417956	0.526023	0.115586
eg_045	APBA1_HUMAN	0.0340416	-0.539271	-0.220493	0.375219	-0.380284	-0.253401	-0.598833	-0.359674	-0.250251	-0.588763	-0.423146	-0.306925	-0.59125	-0.127758	0.0375331	0.480007
eg_045	APBA1_HUMAN	-0.0150508	-0.441042	-0.174674	0.412362	-0.623095	-0.21519	-0.643799	-0.302062	-0.286169	-0.531497	-0.285509	-0.532857	-0.688925	-0.0316588	0.263646	0.170123
eg_046	SFRP2_HUMAN	-1.2102	0.206972	0.137282	-0.075792	-0.0724551	0.287689	0.184899	1.07261	-0.289824	0.312255	-0.0442418	0.0433047	-0.257668	0.338865	-0.567133	0.104826
eg_046	SFRP2_HUMAN	-1.27393	0.04909	0.0202227	0.10457	-0.157987	0.191417	0.150769	0.991274	-0.212643	0.265061	-0.0191706	0.0176665	-0.291754	0.291649	-0.256201	0.0204508
eg_047	SFRP3_HUMAN	0.0725737	-0.505212	-0.315924	0.424274	-0.642412	-0.293427	-1.04249	-0.303453	-0.289233	-0.57683	-0.355594	-0.35477	-0.704406	-0.131457	0.186894	-0.0843205
eg_047	SFRP3_HUMAN	0.167442	-0.473778	-0.351707	0.467371	-0.733338	-0.0740385	-1.13863	-0.328147	-0.396834	-0.626741	-0.324158	-0.0261149	-0.808901	0.0116783	0.298423	0.19359
eg_048	ERBB3_HUMAN	-0.111074	-0.0940362	-0.283764	0.432508	0.305428	-0.807595	-0.797504	-0.681874	0.438343	0.116615	-0.659034	-1.18256	-0.0555669	-0.897458	0.0800546	-0.644435
eg_048	ERBB3_HUMAN	-0.118231	-0.177568	-0.263367	0.401731	0.249181	-0.771922	-0.753401	-0.801962	0.368699	0.0455658	-0.903783	-1.13834	-0.099651	-0.835881	0.0251971	-0.710723
eg_048_or eg_049	CDN2B_HUMAN or ERBB3_HUMAN	0.152051	-0.550123	-0.261007	0.422568	-0.482616	-0.415022	-1.19069	-0.507778	-0.260309	-0.671237	-0.367753	-1.01219	-0.684017	-0.131079	-0.0392071	-0.189663
eg_048_or eg_049	CDN2B_HUMAN or ERBB3_HUMAN	0.496028	-0.41331	-0.455267	0.0363992	-0.46064	-0.425818	-0.0811108	-0.272727	-0.0787892	-0.443534	-0.384454	-0.425849	-0.392258	-0.595032	0.280367	-0.400528
eg_048_or eg_049	CDN2B_HUMAN or ERBB3_HUMAN	0.0459673	-0.560964	-0.270945	0.513963	-0.683638	-0.368134	-1.20892	-0.444609	-0.553465	-0.611044	-0.407796	-0.671195	-0.777341	-0.00820207	0.0666545	-0.089652
eg_048_or eg_049	CDN2B_HUMAN or ERBB3_HUMAN	0.159121	-0.333204	0.152204	0.123429	-0.44352	-0.428091	-0.0749966	-0.477588	-0.186966	-0.305177	-0.369797	-0.705454	-0.562391	-0.463043	0.437234	-0.353885
eg_050	RASF1_HUMAN	-0.0992409	-0.309343	-0.00753517	0.319044	-0.416616	-0.366271	-0.0596729	-0.218159	0.109709	-0.133076	-0.20633	-0.212855	-0.27557	-0.337762	0.472125	-0.295186
eg_050	RASF1_HUMAN	-0.0815447	-0.216973	0.146358	0.331152	-0.405127	-0.375421	-0.128644	-0.195414	0.0157857	-0.238478	-0.224891	-0.182445	-0.119255	-0.339608	0.373942	-0.276029
eg_051	MLH1_HUMAN	0.243343	-0.265103	-0.119495	0.394072	-0.287134	-0.256011	-0.942432	-0.279713	-0.188327	-0.411013	-0.116788	-0.51764	-0.279129	0.0245429	-0.0468352	0.35073
eg_051	MLH1_HUMAN	0.560213	-0.284614	-0.141992	0.355643	-0.383904	-0.268885	-0.904335	-0.26525	-0.259371	-0.441196	-0.245334	-0.774048	-0.411445	0.0443233	0.0996042	0.00206502
eg_052	SOCS1_HUMAN	0.010625	-0.611644	-0.161177	0.411882	-0.340577	-0.223129	-0.757531	-0.332218	-0.322587	-0.650593	-0.327758	-0.20789	-0.719393	-0.152527	0.152914	0.412697
eg_052	SOCS1_HUMAN	-0.0695806	-0.51449	-0.2301	0.415932	-0.572448	-0.241167	-0.812634	-0.297868	-0.359983	-0.585438	-0.268736	-0.217873	-0.741938	-0.0659869	0.369125	0.281558
eg_053	APC_HUMAN	0.0681905	-0.533351	-0.302774	0.364269	-0.580317	-0.318827	-1.01244	-0.320029	-0.156547	-0.579609	-0.36843	-0.580524	-0.64362	-0.044265	0.0308408	0.0311565
eg_053	APC_HUMAN	0.0532781	-0.545475	-0.282543	0.521828	-0.70606	-0.26504	-0.857086	-0.32236	-0.365404	-0.565136	-0.295664	-0.472812	-0.752021	0.0163691	0.118216	0.0715075
eg_054	PYR1_HUMAN	0.234223	-0.393426	-0.213614	0.448432	-0.546523	-0.373671	-0.992666	-0.270066	-0.212891	-0.479135	-0.286072	-0.574036	-0.541764	-0.0262284	-0.00398121	0.358051
eg_054	PYR1_HUMAN	0.339425	-0.416783	-0.222949	0.462298	-0.678864	-0.285982	-0.90842	-0.297033	-0.253854	-0.55469	-0.297976	-0.377456	-0.62962	-0.00228484	0.0900626	0.433756
eg_055	MUC6_HUMAN	3.45849	-2.51757	0.00504524	-0.0144605	5.85188	-2.60085	3.94719	-0.573124	-1.46801	-3.49999	4.18782	-1.8935	0.0999412	-4.58894	5.14913	-4.69419
eg_055	MUC6_HUMAN	4.06399	-2.24108	0.0373215	-0.00887863	6.05822	-2.51796	4.75909	-0.918416	-1.51207	-3.7304	4.77664	-1.50588	0.0397762	-5.05323	5.42204	-5.32357
eg_056	RARB_HUMAN	0.102654	-0.536089	-0.352341	0.401909	-0.564386	-0.392586	-1.11171	-0.382718	-0.306523	-0.554473	-0.372122	-0.58986	-0.65152	-0.111243	-0.0542009	-0.186899
eg_056	RARB_HUMAN	0.258448	-0.519247	-0.330608	0.460483	-0.56307	-0.236311	-0.851469	-0.395729	-0.443582	-0.551793	-0.328434	-0.434511	-0.67878	0.00391784	-0.0660517	0.0655544
eg_057	ST14_HUMAN	0.138958	-0.316116	-0.147898	0.229833	-0.441097	-0.445007	-0.895147	-0.316062	-0.170064	-0.435633	-0.0788856	-0.837111	-0.300286	0.18578	-0.0216707	-0.0573504
eg_057	ST14_HUMAN	0.158542	-0.318719	-0.157193	0.276816	-0.398384	-0.211625	-0.751157	-0.171596	-0.323257	-0.466309	-0.0115812	-0.361117	-0.366864	0.224885	0.103805	0.0885527
eg_058	SPB5_HUMAN	0.196621	-0.325836	-0.144214	0.369077	-0.465494	-0.1949	-0.796712	-0.264438	-0.18646	-0.444635	-0.147207	-0.219203	-0.424519	0.0345468	0.0713571	0.61201
eg_058	SPB5_HUMAN	0.318381	-0.376996	-0.146242	0.37874	-0.492875	-0.147928	-0.682351	-0.22963	-0.262291	-0.516869	-0.151127	-0.0586518	-0.549447	0.0816049	0.210436	0.32855
eg_059	CADM1_HUMAN	0.13574	-0.493149	-0.298996	0.441671	-0.325325	-0.44988	-1.0425	-0.496252	-0.136757	-0.514389	-0.367654	-0.804963	-0.59808	-0.0891031	-0.0298172	-0.0379197
eg_059	CADM1_HUMAN	0.0804199	-0.48602	-0.37532	0.530231	-0.478668	-0.350341	-1.12673	-0.448297	-0.350786	-0.580861	-0.443143	-0.906772	-0.614367	-0.051654	0.118986	-0.160661
eg_060	BID_HUMAN	0.0765343	-0.588635	-0.362947	0.448265	-0.457871	-0.308873	-1.20365	-0.462836	-0.325627	-0.603865	-0.487516	-0.914417	-0.761046	-0.159613	-0.0551483	0.120668
eg_060	BID_HUMAN	-0.0379826	-0.514351	-0.435912	0.433869	-0.666452	-0.25079	-1.17993	-0.442688	-0.408109	-0.633554	-0.563528	-1.226	-0.760629	-0.14685	0.049159	-0.10945
eg_061	CASP3_HUMAN	0.191222	-0.527632	-0.389988	0.464923	-0.575485	-0.335221	-0.884025	-0.335085	-0.308449	-0.592975	-0.381644	-0.231735	-0.743459	-0.153128	0.122821	0.00757908
eg_061	CASP3_HUMAN	0.203726	-0.580831	-0.316579	0.497269	-0.680637	-0.227214	-0.884249	-0.34348	-0.416651	-0.630303	-0.353689	-0.116924	-0.821992	-0.0502718	0.245846	0.258956
eg_062	CASP8_HUMAN	-0.0411396	-0.221314	-0.184455	-0.0512445	-0.181074	-0.11919	-0.170077	-0.121204	-0.124857	-0.111929	-0.128994	-0.145176	-0.1406	-0.0858943	-0.0901738	-0.100943
eg_062	CASP8_HUMAN	-0.091719	-0.00409878	0.0820387	-0.0749548	-0.214954	-0.192121	-0.238764	-0.0965883	0.016557	-0.0474794	-0.142922	-0.119237	-0.17871	-0.139083	-0.113179	-0.118418
eg_063	CASP3_HUMAN	-0.0990152	-0.338778	-0.227014	-0.0527725	-0.119252	-0.160326	-0.312777	-0.216529	-0.122634	-0.139412	-0.14542	-0.166027	-0.0924738	-0.0752434	-0.176788	-0.161961
eg_063	CASP3_HUMAN	-0.0901327	-0.258216	-0.259701	-0.0332445	-0.142704	-0.212569	-0.251095	-0.164758	0.0750426	-0.0634068	-0.113064	-0.0775523	-0.15048	-0.153805	-0.11141	0.0172005
eg_064	CASP8_HUMAN	0.128986	-0.343695	-0.0698056	0.345678	-0.623067	-0.0704082	-0.523195	-0.20391	-0.212245	-0.451317	0.00535494	0.221794	-0.377632	0.0996223	0.232848	0.872616
eg_064	CASP8_HUMAN	0.192507	-0.369457	-0.0510554	0.355112	-0.740544	-0.00399744	-0.487947	-0.267192	-0.26134	-0.551516	-0.0125411	0.399345	-0.530828	0.214385	0.437613	0.801257
eg_065	CASP9_HUMAN	-0.134377	-0.305017	-0.203028	-0.0490868	-0.116259	-0.119722	-0.290356	-0.186431	-0.122222	-0.180778	-0.140014	-0.163748	-0.0615682	-0.139107	-0.262849	-0.216468
eg_065	CASP9_HUMAN	-0.0810563	-0.228338	-0.266864	-0.0382164	-0.161779	-0.162021	-0.158517	-0.16077	0.00379975	-0.0609108	-0.0872534	-0.0847038	-0.0897566	-0.0760196	-0.131987	-0.0980125
eg_066	CASP9_HUMAN	-0.0304283	-0.261652	-0.0319265	0.155487	-0.455021	-0.229424	-0.0152139	-0.342314	-0.14143	-0.304115	-0.131594	-0.288532	-0.183527	-0.30304	-0.130888	-0.258187
eg_066	CASP9_HUMAN	0.0154999	-0.278403	-0.151466	0.23715	-0.467598	-0.237502	0.0313961	-0.195048	-0.199221	-0.231132	-0.185282	-0.27782	-0.226564	-0.288016	-0.0904611	-0.240353
eg_067	na	0.302372	-0.364732	-0.258686	0.362178	-0.46644	-0.447913	-1.18918	-0.397923	-0.269571	-0.557866	-0.41673	-1.12648	-0.501688	-0.128915	-0.0203603	-0.0748803
eg_067	na	0.123141	-0.356692	-0.209193	0.430463	-0.464122	-0.366022	-1.02636	-0.42921	-0.31102	-0.563893	-0.418739	-0.949703	-0.490028	0.160259	0.0449976	-0.0356066
eg_069	FASTK_HUMAN	0.395118	-0.39496	-0.153441	0.430471	-0.540153	-0.317496	-0.651815	-0.198344	-0.195345	-0.419376	-0.230981	-0.34141	-0.557273	-0.140688	0.14011	0.654279
eg_069	FASTK_HUMAN	0.233622	-0.316755	-0.146293	0.455214	-0.679119	-0.186384	-0.676212	-0.231268	-0.272866	-0.520331	-0.228746	-0.236026	-0.689053	-0.0453589	0.259379	0.655201
eg_070	TIA1_HUMAN	0.239616	0.418847	0.0658533	0.293325	-0.235368	0.459265	-1.17808	0.188682	0.264139	0.881338	-1.54124	-0.966991	-0.316076	-0.485014	-0.83099	0.363622
eg_070	TIA1_HUMAN	0.646116	0.416158	0.146143	0.329642	-0.278929	0.375636	-1.09535	0.282831	0.194273	0.833344	-1.30301	-0.928006	-0.181601	-0.274996	-0.971059	0.307558
eg_071	LMNB1_HUMAN	-0.386961	-0.235461	-0.149295	-0.0508584	-0.144015	0.073448	0.354037	0.0870092	-0.307968	-0.207326	0.679309	0.411695	-0.16176	0.629873	-0.059928	-0.0883988
eg_071	LMNB1_HUMAN	-0.603451	-0.19961	-0.0725628	-0.0550884	-0.289886	0.15061	0.475737	0.0527063	0.147478	-0.175119	0.697557	0.377367	-0.199081	0.729231	0.162647	-0.355416
eg_072	CRP_HUMAN	0.063254	-0.199876	0.0472674	0.143105	-0.019695	-0.796408	0.160332	0.757878	0.085473	-0.104394	0.104367	-0.00282535	0.812	-0.147342	0.328702	-0.125393
eg_072	CRP_HUMAN	0.163731	-0.090032	0.127387	0.132208	-0.0767848	-0.977507	0.41836	1.07901	0.0237126	-0.0156012	0.113827	0.0357536	-0.300669	-0.0961151	0.406997	-0.30297
eg_073	na	0.0899983	-0.377242	-0.134229	0.28659	-0.743568	-0.15601	-0.558749	-0.201932	-0.223925	-0.496634	-0.0304474	0.226226	-0.488995	-0.00878865	0.1538	0.769907
eg_073	na	0.0933712	-0.384672	-0.126573	0.328785	-0.770087	-0.087814	-0.545193	-0.227165	-0.252329	-0.532465	-0.0436938	0.351305	-0.582406	0.0827534	0.391574	0.652356
eg_075	IFNG_HUMAN	-2.17467	1.65279	-0.882615	-0.812417	1.57705	0.400912	0.0832078	0.00939549	-0.0904253	0.857434	0.31619	1.64669	1.05596	-0.283687	-1.66135	0.10701
eg_075	IFNG_HUMAN	-1.75633	1.87404	-1.04443	-0.799753	1.6764	0.436704	0.165039	-0.00553425	-0.200601	0.804843	0.604787	1.62662	1.14723	-0.194688	-1.83276	0.0326179
eh_001	CTGF_HUMAN	0.168638	0.296696	0.167796	0.155656	-0.167964	-0.00784909	0.127163	0.297114	-0.197736	0.19462	-0.0227276	0.0434949	0.00683844	0.196096	0.446389	-0.685737
eh_001	CTGF_HUMAN	0.283928	0.384068	0.103389	0.28283	-0.119682	-0.115541	0.110057	0.258507	-0.210174	0.20791	-0.11217	0.0140211	-0.254223	0.302349	0.572474	-0.763082
eh_002	CYR61_HUMAN	0.257697	-0.203117	-1.18306	-0.739653	1.16191	-0.138449	0.607982	-0.564422	0.450434	-1.14628	2.17954	-2.03629	0.43788	-1.20951	0.646727	-0.467648
eh_002	CYR61_HUMAN	0.786463	-0.00677427	-1.16208	-0.734107	1.07398	-0.178932	0.652404	-0.819215	0.29458	-1.2118	1.66009	-1.03741	0.512876	-1.35568	0.71798	-0.602985
eh_003	IBP3_HUMAN	0.105901	0.20705	0.056815	-0.148833	0.456846	-0.0071078	-0.363913	1.10022	-0.774814	2.45885	-0.917559	0.414585	-0.0957917	0.633592	-0.30792	-0.425704
eh_003	IBP3_HUMAN	-0.0469504	0.230919	0.121364	-0.129592	0.303457	0.0643031	-0.220957	1.07998	-0.630241	2.32364	-1.03558	0.409253	-0.189226	0.745309	-0.144668	-0.553085
eh_004	IBP5_HUMAN	0.298231	0.126912	0.00225698	0.0703108	0.130524	0.355387	-0.379545	0.449886	0.0762668	0.595937	-0.060179	0.277318	0.163	0.676739	0.554642	0.842159
eh_004	IBP5_HUMAN	-0.0771435	0.32136	0.0803062	0.0790036	0.174561	0.370118	-0.176111	0.308669	0.100062	0.601187	0.00680848	0.59977	0.0556851	0.973241	0.761927	0.921971
eh_005	IBP6_HUMAN	0.0206703	-0.339272	-0.219741	0.16208	0.121236	-0.347635	-0.596369	-0.285993	-0.223313	-0.247422	-0.309441	-0.503743	-0.496144	-0.111008	0.160945	0.317714
eh_005	IBP6_HUMAN	-0.231396	-0.277995	-0.220392	0.188289	-0.0208451	-0.182349	-0.52417	-0.296265	-0.354508	-0.291257	-0.421694	-0.263229	-0.645811	-0.0330193	0.275751	-0.523454
eh_006	IGFBP7_HUMAN	-3.89904	0.767069	-0.326341	1.56711	-2.62407	0.494934	-2.62139	2.26455	-1.82068	4.34631	-2.27193	2.57691	-3.1865	2.1833	1.21285	3.07126
eh_006	IGFBP7_HUMAN	-3.89947	0.931427	-0.326027	1.51601	-2.57168	0.445643	-2.65804	2.24561	-1.95007	4.3628	-2.45545	2.49414	-3.34443	2.2609	0.887015	2.98822
eh_007	IF2B1_HUMAN	-0.00289781	-0.474616	-0.213482	0.357862	-0.709409	-0.166545	-0.805336	-0.231708	-0.360632	-0.564999	-0.276192	0.0348798	-0.720598	-0.124596	0.423963	0.21652
eh_007	IF2B1_HUMAN	0.0674207	-0.528926	-0.23363	0.452033	-0.867069	-0.0170272	-0.728391	-0.30269	-0.468074	-0.173879	-0.243769	0.357072	-0.856716	0.0362057	0.650489	0.534103
eh_008	IF2B2_HUMAN	0.19911	-0.508966	-0.215867	0.245942	-0.159419	-0.232401	-1.18454	-0.0704183	-0.207778	-0.548972	-0.372826	-0.786058	-0.406175	-0.26103	0.00756554	0.231281
eh_008	IF2B2_HUMAN	0.236646	-0.507136	-0.247069	0.285177	-0.330255	-0.0732784	-0.791851	-0.253843	-0.305398	-0.536017	-0.367503	-0.865536	-0.633402	0.0424441	0.257376	-0.0279619
eh_009	IGF1_HUMAN	-0.0392302	0.147033	-0.763798	0.175946	0.693923	-0.535011	-0.900293	1.37246	0.743177	-0.402985	-0.136255	-1.79078	0.530515	-0.444181	-1.01788	-1.00613
eh_009	IGF1_HUMAN	0.241543	0.269993	-0.837279	0.124601	0.798771	-0.487929	-0.80814	0.88417	0.814632	-0.456411	-0.431828	-1.95862	0.480743	-0.703736	-1.0284	-0.473191
eh_010	IGF1R_HUMAN	-0.00341455	-0.598358	-0.235019	0.47	-0.414064	-0.0805576	-0.901586	-0.143317	-0.289277	-0.576932	-0.415686	-0.323364	-0.696937	-0.137707	0.162017	0.868374
eh_010	IGF1R_HUMAN	0.00667394	-0.48407	-0.153908	0.518792	-0.936433	-0.0621627	-0.927919	-0.117015	-0.329341	-0.481752	-0.395632	-0.22265	-0.786619	-0.0497625	0.453853	0.312772
eh_011	IGF2_HUMAN	-0.101336	-0.00565068	0.226265	-0.269278	0.269949	0.841506	0.751693	0.604238	0.0551265	0.274908	0.367139	0.339074	0.0567853	0.478146	0.192219	-0.0323109
eh_011	IGF2_HUMAN	-0.0285696	0.172188	0.232481	-0.194162	0.311891	0.96812	0.969673	0.660322	0.0487135	0.325989	0.468741	0.715619	0.073875	0.792247	0.249669	-0.00788335
eh_012	IBP4_HUMAN	-0.404262	0.605664	-0.248206	-0.070229	0.326939	0.667773	-0.509291	0.0394858	-0.0824861	-0.207833	-0.190394	-0.277424	-0.459946	-0.480454	0.679491	-0.41218
eh_012	IBP4_HUMAN	-0.374662	0.796707	-0.263345	-0.0957627	0.326344	0.83411	-0.454149	-0.156885	0.0477206	-0.222458	-0.233738	-0.250933	-0.452215	-0.56768	0.956589	-0.338863
eh_013	MPRI_HUMAN	-1.09807	1.04544	-0.0509505	0.0909295	-0.73139	0.324109	0.0246655	0.666772	0.545975	0.35521	0.35294	1.54374	-0.626884	0.440908	-0.0248197	0.588343
eh_013	MPRI_HUMAN	-1.13423	0.904841	-0.0382603	0.0997403	-0.820462	0.345544	-0.0343541	0.504897	0.209149	0.437132	0.222215	1.33098	-0.640776	0.430135	-0.0766472	0.668614
eh_015	NOV_HUMAN	-0.0646454	0.0507067	0.232579	0.0779389	0.283708	0.408716	0.420983	0.15881	-0.00932931	0.201224	0.212198	0.488306	0.116362	0.446026	0.204461	-0.00680671
eh_015	NOV_HUMAN	0.449172	0.00361397	0.179933	0.0766545	0.170091	0.695929	0.632964	0.248941	-0.199706	0.221463	0.238889	0.420065	0.113968	0.616334	0.486839	-0.0535172
eh_016	PAPP1_HUMAN	-0.343851	1.01914	0.57617	0.0639526	-0.0640042	0.819402	1.58153	0.375994	0.588577	0.391149	0.663098	1.18952	-0.0117485	0.909294	0.225905	0.392122
eh_016	PAPP1_HUMAN	-0.223853	0.924344	0.673919	0.117632	-0.149942	0.930449	1.75278	0.467807	0.37729	0.353132	0.735825	1.48994	7.481e-05	1.0475	0.631073	0.526215
eh_017	AKA12_HUMAN	0.1972	-0.297589	-0.103051	0.318887	-0.402298	-0.203404	-0.697905	-0.320976	-0.25365	-0.455702	-0.0736794	0.043738	-0.330831	0.0166215	-0.00916818	0.382929
eh_017	AKA12_HUMAN	0.212419	-0.300534	-0.0396977	0.370376	-0.458647	-0.206933	-0.517032	-0.296588	-0.290052	-0.511585	-0.0446607	-0.388119	-0.454214	0.113228	0.118784	0.388968
eh_018	CYBP_HUMAN	-0.99219	0.0399511	0.00064555	0.178231	-0.444224	-0.224063	-0.616685	-0.194203	-0.262642	0.073488	-0.0844775	0.744601	-0.781731	1.15774	1.48904	1.37471
eh_018	CYBP_HUMAN	0.161926	0.000648081	-0.0476896	0.0778985	-0.416905	-0.0595029	-0.565106	-0.139753	-0.238848	-0.263041	0.0852217	-0.219812	-0.726616	0.899381	1.64927	0.302281
eh_019	CASPA_HUMAN	-0.223591	0.00112755	0.350353	-0.123884	0.158878	0.16437	0.63387	0.104657	0.0875159	0.14344	0.214375	0.404433	0.185631	0.19534	-0.0942411	-0.0866573
eh_019	CASPA_HUMAN	-0.00100978	-0.0717824	0.187826	-0.154233	0.0192993	0.25264	1.36772	0.138624	0.202713	0.22675	0.492085	0.623874	-0.096624	0.252383	0.308858	-0.124774
eh_020	CDN2B_HUMAN	0.234965	-0.31154	-0.0837844	0.302621	-0.702024	-0.0793268	-0.558435	-0.0340119	-0.187417	-0.391968	-0.1034	0.102439	-0.704941	0.128497	0.24235	0.860115
eh_020	CDN2B_HUMAN	-0.0845898	-0.185084	-0.0599321	0.390353	-0.959301	0.0291034	-0.457041	-0.0472252	-0.153961	-0.38328	-0.114428	0.27205	-0.774675	0.215825	0.311359	0.862012
eh_021	CLD7_HUMAN	0.0384452	0.0474482	-0.1323	0.288133	-0.862667	-0.145988	-0.744717	0.173363	-0.38415	-0.224011	-0.159927	0.211859	-0.535434	0.238556	-0.190878	1.22393
eh_021	CLD7_HUMAN	-0.302244	0.0237313	-0.0984582	0.312728	-0.975392	-0.0183113	-0.68157	0.18145	-0.389006	-0.155384	-0.185468	0.35947	-0.73693	0.27119	0.161153	1.23141
eh_022	PGH2_HUMAN	0.140273	0.31673	0.510706	-0.19651	0.507864	0.109698	0.0335003	0.357424	0.142169	0.44927	-0.803448	0.370733	0.438685	-0.117974	-0.321668	-0.170303
eh_022	PGH2_HUMAN	0.056394	0.212948	0.636363	-0.261263	0.519921	0.196668	0.70901	0.470798	0.333572	0.664808	-0.551598	0.478797	0.0876027	0.0132994	-0.105283	-0.124886
eh_023	DKK3_HUMAN	-3.05233	2.14949	-2.40782	-2.41585	3.47827	-0.292598	-2.24289	0.221738	0.789922	0.710843	0.677164	2.6026	2.32109	-3.08681	-0.880053	-0.270919
eh_023	DKK3_HUMAN	-2.55507	2.09619	-2.47941	-2.18671	3.41107	-0.275807	-1.69696	0.453196	1.1115	1.57077	0.888568	2.07397	2.14047	-3.3239	-1.38657	-0.72388
eh_024	FAK1_HUMAN	0.206609	2.24248	0.131774	-0.00618861	0.360695	0.141443	0.170328	0.172269	0.787082	0.247807	0.206905	0.0665555	0.392952	-0.723955	-0.135127	0.685049
eh_024	FAK1_HUMAN	0.38964	2.39978	0.218182	0.189185	0.451843	0.114146	0.446882	0.335703	0.960627	0.0335318	0.16406	0.0181277	0.295492	-0.797848	-0.218812	0.703654
eh_025	GPX4_HUMAN	0.365986	1.54985	0.232202	0.073924	0.605224	0.331897	-0.327525	2.03548	1.97347	0.0542033	0.264893	0.12141	0.446849	-1.92168	0.154611	0.636693
eh_025	GPX4_HUMAN	0.425149	1.79399	0.334797	0.206868	0.624072	0.00629703	-0.271512	1.31779	2.28124	0.131387	0.281608	0.201946	0.476518	-2.04768	0.145817	0.699995
eh_026	IGF1_HUMAN	-0.165361	0.215431	-0.487404	-0.0491815	0.502345	-0.598613	-0.414886	2.04081	0.388065	-0.602241	0.131925	-1.44601	0.43709	0.00502817	-0.946295	-0.306492
eh_026	IGF1_HUMAN	-0.164619	0.339987	-0.62814	0.00939864	1.0223	-0.383817	-0.241214	1.38293	0.351535	-0.62192	-0.135503	-1.30813	0.342781	-0.0553969	-0.757987	-0.141018
eh_027	IL1A_HUMAN	-0.234801	0.240686	0.00879864	0.0955811	0.20127	-0.147005	-0.43256	1.9372	0.0341614	-0.468014	-0.0923678	-0.422041	0.0141721	-0.332499	-0.0972741	0.136676
eh_027	IL1A_HUMAN	0.0297675	0.490828	0.102477	0.0445402	0.0026791	-0.197594	-0.325045	0.879549	0.30675	-0.461956	0.0345259	-0.479436	-0.133086	-0.393374	-0.0671632	0.194091
eh_028	LYAM1_HUMAN	-0.300039	-0.0247435	-0.131388	-0.00861118	-0.268992	-0.480475	-0.216411	-0.144792	0.0763394	0.0801137	-0.0036334	0.130017	-0.226928	-0.26098	0.0748934	0.215175
eh_028	LYAM1_HUMAN	-0.33938	-0.106921	-0.0767428	0.00734991	-0.109497	-0.4195	0.044628	-0.0411058	-0.0139218	-0.17894	-0.0750157	0.191918	-0.381028	-0.273605	0.0115541	0.261915
eh_029	IRS2_HUMAN	2.46051	1.44255	3.06854	3.73623	1.09774	4.20611	3.58339	2.64528	1.11905	0.321257	3.31962	2.17143	0.780298	1.12836	4.69619	3.22482
eh_029	IRS2_HUMAN	2.70335	1.50071	3.1773	3.81293	0.979331	4.26951	3.45119	2.47978	1.07846	0.414889	3.17615	2.35465	0.525339	1.09561	4.84588	3.51986
eh_030	MLP3B_HUMAN	-0.302121	1.05336	0.0865144	-0.254207	0.212321	0.0413852	0.0877707	-0.0327767	0.00091508	-0.0700412	0.206976	0.25554	0.239072	-1.2459	-1.03189	0.0998016
eh_030	MLP3B_HUMAN	-0.372622	1.03021	0.128032	-0.302367	0.195003	0.118953	0.233391	-0.0863058	1.23675	-0.00682619	0.206834	0.243547	0.142648	-0.866767	-0.913266	0.230748
eh_031	MK12_HUMAN	-0.075696	0.111902	0.075663	0.0384729	0.0576573	0.52542	-0.127536	2.71478	-0.339486	-0.222335	-0.031794	-0.150723	0.0329184	0.151968	-0.251724	0.303951
eh_031	MK12_HUMAN	0.386273	0.156126	0.170313	-0.0382544	-0.351885	0.55305	0.249591	-0.0258974	-0.296476	0.0123188	-0.139174	-0.102388	0.00257524	0.240867	-0.057221	0.441827
eh_033	MMP7_HUMAN	0.675385	-0.336489	-0.748309	-1.01634	0.526321	-1.38501	-0.761326	0.402815	-0.103932	-0.819645	-0.312304	-1.82806	0.275252	-0.83134	-1.19667	-1.61662
eh_033	MMP7_HUMAN	0.767176	-0.370354	-0.863724	-1.15083	0.596181	-1.58755	-0.480098	0.466065	-0.164793	-0.915284	-0.227487	-1.64791	-0.017631	-1.18392	-1.09385	-1.88452
eh_034	MUC2_HUMAN	-0.0539505	0.387025	0.239002	0.710526	1.23009	0.201653	0.0842773	0.300066	1.70061	0.572883	-0.167308	-0.417141	1.41611	-1.5128	-0.526332	-0.567923
eh_034	MUC2_HUMAN	0.00861862	0.403122	0.307259	0.592475	1.28634	0.244774	0.103359	0.361902	1.75619	0.473018	-0.302231	-0.215335	1.47468	-1.65263	-0.473216	-0.653876
eh_035	MUC5B_HUMAN	-0.134784	-0.136998	0.153586	-0.158569	-0.0865217	0.311442	0.855501	-0.0240679	0.105271	0.358544	0.120905	0.343758	-0.128241	0.0366535	0.321417	-0.150852
eh_035	MUC5B_HUMAN	-0.0162482	-0.129274	0.165776	-0.15056	0.0454003	0.208547	0.659846	0.0826475	0.224925	0.25814	0.396202	0.313381	-0.0635183	0.0735763	0.29648	-0.14899
eh_036	MAD4_HUMAN	-0.211004	-0.341892	0.010029	0.0293338	-0.101868	0.208939	-0.131746	0.728783	-0.145613	-0.148965	-0.178337	-0.159499	-0.220711	-0.00271784	-0.0132541	-0.156439
eh_036	MAD4_HUMAN	-0.0335617	-0.343742	0.059105	-0.622941	-0.228048	0.334685	-0.315224	0.889687	-0.165236	-0.161185	-0.210981	-0.239334	-0.161602	-0.0107808	0.119425	-0.208566
eh_037	DCOR_HUMAN	0.226721	0.717173	-0.0132699	0.633508	0.761638	-0.256311	-0.649092	0.0289473	0.251769	-0.13873	-0.103455	-0.289692	0.0280151	-0.340396	0.341508	-0.848014
eh_037	DCOR_HUMAN	-0.034291	0.735564	0.0777945	0.755708	0.79614	-0.232421	-0.409525	0.142395	0.268386	-0.186171	-0.0107569	-0.176719	0.0161886	-0.0692045	0.324314	-0.742596
eh_038	PAK1_HUMAN	0.351396	-0.320089	0.0132866	0.269567	-0.737249	-0.153649	-0.43315	-0.0797485	-0.149955	-0.441502	-0.152591	0.0654593	-0.419191	0.130284	0.229347	0.79277
eh_038	PAK1_HUMAN	-0.0127683	-0.228741	0.0519399	0.225139	-0.785728	0.0238589	-0.451923	-0.0963775	-0.208031	-0.462064	0.0322124	0.0780095	-0.550673	0.157048	0.590499	0.735384
eh_039	RASF1_HUMAN	-0.173572	-0.0930948	-0.0121645	0.542134	-0.265333	-0.426829	-0.154621	-0.213172	0.0516907	0.189118	-0.605169	-0.328437	-0.0584015	-0.731988	0.537585	-0.0967411
eh_039	RASF1_HUMAN	0.0215341	-0.338267	-0.0471295	0.275037	-0.327537	-0.433677	-0.133276	-0.129611	-0.16023	-0.152711	-0.70218	-0.296582	0.00346067	-0.777575	0.708302	-0.115152
eh_040	S10A6_HUMAN	0.591296	0.360166	-0.133242	0.407949	-0.896181	-0.543746	-0.460002	0.0817808	0.287998	0.136712	-0.0166159	0.100096	-0.840562	0.389353	0.414752	1.05122
eh_040	S10A6_HUMAN	0.451532	0.34979	-0.19065	0.381165	-1.33468	-0.613241	-0.522585	0.334749	0.0848383	0.0403569	-0.0571063	-0.109294	-1.1389	0.620418	1.03111	1.2315
eh_041	TEP1_HUMAN	0.0426679	0.013782	0.00510453	-0.0235978	-0.37606	0.0622025	0.269416	-0.00764546	-0.143022	-0.293958	0.227122	-0.0769318	-0.147966	0.359758	0.27477	-0.0184531
eh_041	TEP1_HUMAN	-0.165002	-0.111977	0.0714289	0.0680944	-0.568553	0.034361	0.490353	-0.0792434	-0.187701	-0.332956	0.380013	0.479915	-0.298895	0.613947	0.369166	0.219409
eh_042	TMM54_HUMAN	0.369119	0.465546	0.377456	-0.0908306	0.324216	2.60928	0.728693	0.660832	0.350973	0.380783	0.488072	0.53781	0.114424	0.831438	0.565305	0.239104
eh_042	TMM54_HUMAN	0.217084	0.667255	0.510861	0.0709039	0.112641	2.8035	1.05426	0.60459	0.203289	0.318147	0.537506	0.61171	0.10631	1.23855	0.57905	0.399098
eh_043	TNF14_HUMAN	-0.173857	-0.226753	-0.661904	-0.25089	-0.504514	-0.771594	-1.30081	-0.575612	-0.385236	-0.718255	-0.766537	-0.951745	-0.539354	-0.484761	-1.17003	-0.582607
eh_043	TNF14_HUMAN	-0.180522	-0.416425	-0.542661	-0.235141	-0.751021	-0.816529	-1.51597	-0.625395	-0.754474	-0.703351	-0.841234	-1.06686	-0.652896	-0.656658	-1.25274	-0.465544
eh_044	TRI22_HUMAN	-0.00525615	0.111719	-0.533102	-0.231055	-0.161391	-0.235603	-1.02777	0.335341	-0.513087	0.112666	-0.931884	-0.207758	-0.222602	-0.138191	-0.569499	0.0323602
eh_044	TRI22_HUMAN	-0.110181	0.0474375	-0.60886	-0.281459	-0.291799	-0.289911	-1.0009	0.59961	-0.567597	0.267045	-1.11995	-0.272256	-0.2969	-0.0782458	-0.165418	-0.0588615
eh_045	TBB5_HUMAN	0.577415	0.297455	0.293908	1.71474	0.116294	0.622589	-0.233842	-1.69283	0.22105	-0.708945	0.618466	1.54514	1.19334	-1.32894	1.61582	1.90911
eh_045	TBB5_HUMAN	0.641286	0.369041	0.315836	1.62988	0.106501	0.686181	-0.0184523	-1.55283	0.042863	-0.7371	0.746712	1.50805	1.27643	-1.13387	1.58221	1.96713
eh_046	WDR1_HUMAN	0.0512807	0.00262711	-0.199768	0.155147	-0.46007	0.131042	-0.519362	0.430914	-0.239331	-0.264814	-0.407256	-0.37239	-0.333389	-0.181843	-0.0892373	0.28812
eh_046	WDR1_HUMAN	-0.0441013	0.0552716	-0.2257	0.160983	-0.528048	0.203755	-0.527709	0.375375	-0.190826	-0.255755	-0.548071	-0.446492	-0.397177	-0.156724	-0.108953	0.214002
eh_047	Fc fusion with TNR21_HUMAN	-0.630646	0.0675951	0.0691906	0.910226	2.3761	3.11275	-0.75033	-0.668602	2.05507	0.993391	-0.114301	-1.63179	1.41303	-3.32223	1.24478	-0.395382
eh_047	Fc fusion with TNR21_HUMAN	-0.457337	0.0553691	0.0992584	1.03907	1.9541	3.22489	-0.743755	-0.923825	2.34145	0.994647	-0.131474	-1.29085	1.69226	-3.80547	1.53983	-0.134979
eh_048	Fc fusion with TNR6_HUMAN	-0.0191207	-0.0158145	-0.35585	-0.142413	-0.111121	5.62295	-0.238099	0.100693	-0.221853	-0.180183	-0.195416	-0.195031	-0.200561	-0.221027	-0.286308	0.0926382
eh_048	Fc fusion with TNR6_HUMAN	-0.0717901	0.0293636	-0.655691	-0.157198	-0.214649	5.48392	-0.350616	0.0736215	-0.100572	-0.0412202	-0.140092	-0.146071	-0.222722	-0.172308	-0.243518	0.261477
eh_049	Fc fusion with TR13B_HUMAN	0.433889	0.0427235	0.399998	1.2299	-0.941536	4.05009	0.319525	-0.174494	0.3325	-1.24644	1.24291	1.26164	0.417969	2.24029	0.575291	2.07176
eh_049	Fc fusion with TR13B_HUMAN	0.528376	0.00160525	0.471019	1.21093	-0.934241	3.94218	0.364407	0.078562	0.338802	-1.1101	1.21065	1.10453	0.180796	2.28919	-0.134207	0.885555
eh_050	Fc fusion with TNR1B_HUMAN	-0.332243	-0.013141	-0.5487	0.170752	0.484516	3.78288	-1.91329	0.992695	3.23005	1.13218	-2.25609	1.35456	0.200198	-2.43103	-1.70641	0.735644
eh_050	Fc fusion with TNR1B_HUMAN	-0.223787	0.122132	-0.712932	0.285974	0.520716	3.70611	-1.94905	1.07011	3.14752	0.859114	-2.39308	1.44105	0.0917444	-2.7073	-1.74724	0.711893
eh_051	HMGB2_HUMAN	0.210491	-0.153569	0.318536	-0.118847	-0.169371	0.135255	0.027837	0.442608	0.0901846	0.431267	-0.0602324	0.335738	-0.0587866	0.388805	-0.115092	-0.164751
eh_051	HMGB2_HUMAN	0.158014	0.0136981	0.371737	-0.12159	-0.274413	0.22406	0.557593	0.586277	0.048605	0.522287	-0.00167098	0.60907	-0.16394	0.635864	0.221838	-0.122826
eh_052	SORL_HUMAN	0.411675	0.0791611	0.20034	-0.259791	-0.0429022	0.472448	0.592222	0.442051	0.12272	0.259338	0.216617	0.420392	-0.0239181	0.478218	0.137634	-0.0511953
eh_052	SORL_HUMAN	0.229742	0.0922801	0.313461	-0.0872617	-0.0316734	0.565111	0.469628	0.394994	0.00608279	0.671204	0.273757	0.515886	-0.124441	0.555521	0.313899	-0.0443462
eh_053	EWS_HUMAN	0.922403	1.64265	0.461247	1.71806	2.26793	1.4077	0.521995	3.88363	1.44358	0.946782	1.29002	1.20135	2.62027	0.345648	2.10231	1.10771
eh_053	EWS_HUMAN	1.0129	1.80651	0.258149	1.68785	2.26755	1.42273	0.461593	4.08479	1.76225	0.952591	1.09408	0.892739	2.64209	0.556142	2.2626	1.04508
eh_054	CCL2_HUMAN	0.050927	0.393892	0.248682	1.19523	-0.150089	0.706648	-0.602579	0.6248	-0.612026	-1.41287	1.7977	0.233993	0.211886	1.27217	2.78347	2.03356
eh_054	CCL2_HUMAN	-0.249057	0.289202	0.283185	1.52714	-0.233806	0.742355	-0.578315	0.573468	-0.7217	-1.29236	1.81222	0.222795	0.438271	1.27177	2.99552	2.04421
eh_055	B2MG_HUMAN	0.847984	1.23662	0.601706	1.41428	0.56074	1.57887	0.0897357	-0.146298	0.0798299	-0.599129	1.18518	2.98747	0.52231	1.54973	3.9654	0.996662
eh_055	B2MG_HUMAN	0.310128	1.19281	0.667627	1.29057	0.616074	1.6778	0.102114	-0.366867	0.12575	-0.715939	1.15262	3.15285	0.496957	1.59077	4.18595	1.0693
eh_056	HPT_HUMAN	-0.192361	0.28905	0.999091	1.70506	-0.5978	1.98439	-0.47617	-0.836822	0.638024	-0.20683	0.370723	1.90588	-0.78182	-0.294384	3.85655	0.22855
eh_056	HPT_HUMAN	-0.788745	0.319109	1.06929	1.77869	-0.62378	2.15393	-0.505594	-0.971138	0.786103	-0.360654	0.482441	1.51664	-0.877569	-0.377043	3.52524	-0.669126
eh_057	CEAM5_HUMAN	-0.384609	2.02131	-1.33928	-1.07949	1.74138	-0.564207	-1.02789	0.179915	0.439455	0.0577715	-0.110812	1.52632	1.74616	-2.18639	-2.40453	0.802638
eh_057	CEAM5_HUMAN	-0.634078	2.14935	-1.50511	-1.10048	1.65862	0.0412118	-0.805292	0.273857	0.676526	0.884069	-0.0820877	1.47928	1.8806	-2.68235	-2.91926	1.15804
eh_058	ANGT_HUMAN	-0.0210933	-0.451901	-0.229659	0.419126	-0.379297	-0.323023	-0.947065	-0.313818	-0.223909	-0.443161	-0.226216	-0.414177	-0.384971	0.0846372	-0.245356	0.459476
eh_058	ANGT_HUMAN	-0.0452427	-0.408688	-0.237048	0.476853	-0.474639	-0.219644	-0.708557	0.503001	-0.208449	-0.470833	-0.188458	-0.33611	-0.450042	0.194753	-0.152228	0.1039
eh_059	CATA_HUMAN	-0.257449	0.929619	1.72151	0.812427	0.416463	2.58307	1.83306	2.04578	-0.0470413	0.403461	1.52418	4.02329	-0.372634	1.09728	2.51987	2.36113
eh_059	CATA_HUMAN	-0.116921	1.15564	1.91372	0.892053	0.473952	2.6965	2.03046	2.30793	0.110188	0.329862	1.50375	3.91976	-0.297768	1.21478	2.54363	2.19737
eh_060	CAV2_HUMAN	0.873567	0.794079	-0.12836	-0.322051	0.385938	-0.409456	-0.102125	0.000844316	0.547268	0.677605	0.0303327	-0.00404524	0.0844034	-0.51482	0.6143	-0.269313
eh_060	CAV2_HUMAN	1.05333	0.810149	0.20995	-0.282109	0.322002	-0.349872	0.013082	0.0952809	0.619748	0.825163	-0.174496	0.0547949	0.0657209	-0.382903	0.694511	0.057043
eh_061	FLOT1_HUMAN	0.240803	-0.0619622	0.224317	-0.0266497	-0.16929	-0.0941112	0.124296	0.384196	-0.0742127	-0.0659384	-0.143387	-0.16262	-0.135546	-0.11166	0.621897	-0.168957
eh_061	FLOT1_HUMAN	0.445858	0.0541462	0.390327	-0.0214175	0.388294	0.0217949	0.645251	0.356671	-0.213953	0.315001	-0.137447	-0.107254	-0.222459	0.0986525	0.894108	0.352079
eh_062	ICAM1_HUMAN	-1.69442	-0.411595	0.105051	1.92241	-1.35317	1.38922	0.129749	2.14162	-0.833959	-0.520577	-0.0510368	0.493934	-0.0808018	1.60272	1.39925	2.00507
eh_062	ICAM1_HUMAN	-1.19368	-0.166341	0.135423	2.085	-1.38166	1.46767	0.147319	2.13214	-0.917766	-0.445867	-0.0831257	0.220926	-0.070962	1.78032	1.03078	1.7421
eh_063	MMP1_HUMAN	-0.376606	1.73712	0.253937	-0.50608	1.04176	0.231371	-0.00424377	5.33817	1.16955	0.297748	-0.0181783	0.2138	0.151209	-1.03791	-1.5631	0.731516
eh_063	MMP1_HUMAN	-0.481382	1.51512	0.345994	-0.720244	1.24311	0.0756633	0.406498	5.84068	1.19865	0.330161	-0.0782114	0.255729	0.110919	-0.870434	-1.54673	0.613499
eh_064	TFPI2_HUMAN	-2.91486	1.93119	-2.15002	-2.33211	3.59411	0.280586	-1.55719	0.0236943	0.972667	1.57953	1.17763	2.7763	2.57257	-3.52941	-2.91198	-0.00929404
eh_064	TFPI2_HUMAN	-2.57806	1.9369	-2.38673	-2.50497	4.11125	0.475331	-1.63119	0.0597224	1.32564	1.93482	1.43764	2.56946	2.81792	-3.53182	-3.24629	0.12234
eh_065	LMNA_HUMAN	0.170846	-0.33909	-0.141878	0.426394	-0.324547	-0.141099	-0.640249	-0.225447	-0.174044	-0.445353	-0.0527524	-0.00814139	-0.449332	0.181753	0.122002	0.49797
eh_065	LMNA_HUMAN	0.00821208	-0.354055	-0.0745163	0.379883	-0.601847	-0.0685802	-0.604995	-0.226103	-0.247256	-0.522437	-0.143915	0.0977578	-0.512232	0.0982271	0.253338	0.246772
eh_066	CFLAR_HUMAN	0.29836	0.193301	0.325899	-0.0842257	-0.0392436	0.895863	0.461964	0.0903127	-0.0830781	0.409384	0.0424099	0.168407	0.0452749	0.391458	0.153311	0.269
eh_066	CFLAR_HUMAN	0.54372	0.245059	0.197619	-0.0282457	-0.074596	0.732539	0.453965	-0.0159304	-0.00596625	0.488887	0.00446282	0.29514	-0.0409367	0.328456	0.365876	0.208559
eh_067	CFLAR_HUMAN	-0.349259	0.438941	0.365661	-0.38402	0.295739	0.524653	0.304678	5.54752	-0.540911	0.0836507	0.29618	0.140866	0.230097	0.190679	-0.372714	0.196571
eh_067	CFLAR_HUMAN	-0.0651974	0.554176	0.521181	-0.486419	0.146081	0.491922	0.418134	5.25026	-0.533092	0.182571	0.264892	0.147173	0.260544	0.531201	-0.690348	0.827484
eh_068	NFKB1_HUMAN	0.0539098	0.246197	0.0383582	0.160622	0.107846	0.121562	0.199657	-0.176726	-0.0535084	0.0303821	0.0975849	0.0962661	0.0737631	0.207567	0.082543	-0.0886279
eh_068	NFKB1_HUMAN	0.0136186	0.177583	-0.0512627	0.380697	0.114578	0.0453088	0.13398	-0.202648	-0.0153778	0.0229174	0.240175	0.0889268	-0.00247141	0.219861	0.214941	0.331294
eh_069	PGH2_HUMAN	-0.828967	0.0107834	0.572913	0.387638	0.0552093	-0.212522	0.466304	1.94505	-0.223332	0.02046	0.230038	-0.0703412	-0.0487243	-1.5551	0.621517	-0.0437623
eh_069	PGH2_HUMAN	-0.927286	0.0773065	0.491429	0.476833	0.0587957	-0.256764	0.478679	1.84641	-0.234168	0.0149955	0.217127	-0.0472638	-0.0756217	-1.45168	0.895126	-0.0423188
eh_070	GRM1_HUMAN	0.15462	-0.243351	-0.119343	-0.127219	0.481003	1.28937	-0.455173	0.200973	0.308885	-0.011415	0.18284	-0.229917	0.0213013	-0.334428	0.185245	-0.0723261
eh_070	GRM1_HUMAN	0.242948	-0.203938	-0.134109	-0.166868	0.169999	1.45137	-0.200413	0.214572	0.1811	0.0636468	0.207606	-0.189388	-0.0139639	-0.310131	0.193309	-0.0392195
eh_071	FCERA_HUMAN	-0.225079	1.35301	0.863938	-0.00625721	0.138248	0.635234	0.843799	0.500308	1.11378	0.383764	0.227954	1.22711	-0.0103634	0.14663	0.128792	0.298658
eh_071	FCERA_HUMAN	-0.106097	1.69016	0.607227	0.012659	0.300355	0.688011	0.778062	0.473001	1.1537	0.983235	0.286307	1.50888	-0.168773	-0.522564	0.545768	0.458729
eh_072	CCNG1_HUMAN	-0.170447	-0.215814	-0.178136	-0.0255043	-0.0393634	-0.124016	-0.350988	-0.155623	-0.108347	-0.141628	-0.13343	-0.149519	-0.0192766	-0.156233	-0.246952	-0.126736
eh_072	CCNG1_HUMAN	-0.1048	-0.285064	-0.271991	0.0322338	-0.105432	-0.143614	-0.304401	-0.103302	-0.132842	-0.0846232	-0.117408	-0.124178	-0.0483226	-0.0887813	-0.314408	-0.0962382
eh_073	TNF13_HUMAN	-0.0484756	-0.210174	-0.109919	0.0295605	0.0890481	-0.0386272	-0.075465	-0.187414	-0.00669775	-0.0995892	0.040873	-0.0532019	0.0828609	0.0406679	-0.0631967	-0.0456507
eh_073	TNF13_HUMAN	-0.073408	-0.102037	-0.123382	0.0212581	0.0329966	-0.0988678	-0.162506	-0.113568	0.0809778	-0.0720981	-0.00368418	-0.0872712	0.00603426	0.0278039	-0.0231751	-0.0418506
eh_074	LEP_HUMAN	-0.127585	0.204147	0.206524	-0.203211	0.156433	-0.1894	1.22379	0.221325	0.0440807	0.113102	0.360415	0.431519	-0.0264497	0.249047	0.516902	-0.0292041
eh_074	LEP_HUMAN	-0.278307	0.218855	0.423282	-0.229907	-0.00186446	-0.0577652	1.41202	0.0100906	0.239326	0.518888	0.51137	0.701804	-0.103815	0.349451	0.710999	-0.0415996
eh_075	CASP8_HUMAN	0.105865	-0.474475	-0.172405	0.35897	-0.476519	-0.156813	-0.684148	-0.27676	-0.362926	-0.584862	-0.192065	-0.286081	-0.594886	-0.112347	0.19156	0.724952
eh_075	CASP8_HUMAN	-0.1294	-0.385542	-0.192481	0.393614	-0.641438	-0.184162	-0.804623	-0.290817	-0.312109	-0.562178	-0.154052	-0.0425579	-0.598306	-0.0206509	0.276841	0.191399
hs_02	Whole Serum	1.14077	0.123866	0.25609	1.76081	-1.36074	1.52265	-0.471639	-1.71213	-0.171713	0.811906	0.0155318	2.26795	-0.562273	-0.27087	4.16525	1.78663
hs_02	Whole Serum	-0.00248253	-0.136558	0.76217	1.87464	-0.486165	1.83886	-0.427551	-1.69008	-0.192362	0.187689	0.503812	2.17226	-0.315414	-0.488441	3.61554	1.45431
hs_02	Whole Serum	-0.12629	-0.503782	-0.0576744	0.0649282	-0.319872	0.19862	-0.49018	-0.180598	-0.303447	-0.540186	-0.0788313	0.266852	-0.592491	-0.197564	0.597709	0.888482
hs_02	Whole Serum	-0.289883	-0.511505	0.163552	0.259484	-0.731949	0.684256	-0.519271	-0.410677	-0.286288	-0.27606	0.171905	0.860751	-0.484502	-0.200243	1.57681	0.523986
hs_02	Whole Serum	1.24035	0.184511	0.269938	1.79075	-1.40909	1.53937	-0.514255	-1.96616	-0.0596779	0.814839	0.0375361	2.47347	-0.515775	-0.266684	4.12813	1.82472
hs_02	Whole Serum	-0.18878	-0.0124645	0.771072	1.87455	-0.438693	1.917	-0.421181	-1.74335	-0.14605	0.13266	0.524339	2.22546	-0.342352	-0.51711	3.64551	1.31503
hs_02	Whole Serum	-0.196292	-0.446085	0.0572736	0.117954	-0.688159	-0.034942	-0.572303	-0.135218	-0.36973	-0.420745	-0.00124993	0.580164	-0.575309	-0.114266	0.999057	0.413899
hs_02	Whole Serum	-0.287387	-0.572287	0.210032	0.332375	-0.789769	0.653941	-0.560936	-0.539484	-0.478559	-0.495331	0.10211	1.05716	-0.599446	-0.0178693	1.71841	0.757576
hs_03	IGHM_HUMAN	0.22512	-0.348141	0.113379	0.302806	-0.411034	0.734704	-0.349062	-0.0473503	-0.18545	-0.480378	0.233249	0.234004	-0.317719	-0.357815	0.246801	0.910278
hs_03	IGHM_HUMAN	0.047993	-0.228472	0.107146	0.365966	-0.418283	0.628793	-0.386068	-0.149312	-0.312658	-0.485719	0.296131	0.410932	-0.174152	-0.314317	0.589896	0.932596
hs_04	ALBU_HUMAN	0.692726	0.688637	1.50584	2.40596	0.379413	1.66362	0.278122	-1.64279	0.516906	1.00192	0.1873	3.01021	0.250396	0.413839	4.10569	0.939421
hs_04	ALBU_HUMAN	-0.00992248	-0.340856	0.312203	0.319523	-0.340706	0.484368	-0.163374	-0.164129	0.221246	0.133246	0.203974	1.12181	-0.350112	0.04519	1.59228	0.821527
hs_04	ALBU_HUMAN	0.000147768	-0.1448	0.690808	0.879894	-0.349552	0.838658	-0.0939765	-0.804365	0.177388	0.349642	0.337077	1.73582	-0.0815282	0.197619	2.66698	0.594146
hs_04	ALBU_HUMAN	0.807608	0.699691	1.52537	2.24941	-0.285285	1.67542	0.280941	-1.67786	0.569478	1.18314	0.742578	2.99955	0.188287	0.447507	4.1508	0.999302
hs_04	ALBU_HUMAN	0.0191243	-0.328921	0.347824	0.353682	-0.47249	0.428239	-0.156672	-0.336617	-0.0424464	0.123254	0.269238	1.08681	-0.400107	0.11016	1.68206	0.405131
hs_04	ALBU_HUMAN	0.0341985	-0.23676	0.631493	0.903454	-0.372728	0.915931	-0.0828038	-0.492185	0.00287322	0.537834	0.350793	1.95499	-0.236466	0.295439	2.52656	0.503314
hs_05	G3P_HUMAN	1.0679	0.155169	0.196957	1.29008	-1.41595	1.42624	-0.430433	-1.77208	-0.12692	0.882844	0.0416614	2.14782	-0.54117	-0.262148	3.73397	1.61975
hs_05	G3P_HUMAN	1.16599	0.153866	0.212913	1.13593	-1.33324	1.41504	-0.468256	-1.82232	-0.140039	0.804063	0.0118521	2.04796	-0.552083	-0.202136	3.74276	1.57035
it_001	CD1A_HUMAN	-0.617097	0.168763	0.0737907	-0.210056	-0.144378	-0.206622	0.131399	-0.254163	-0.297828	0.0510095	-0.172091	0.0278337	-0.398263	-0.0399261	-0.290692	-0.154456
it_001	CD1A_HUMAN	-0.631888	0.0826094	0.124974	-0.164071	-0.171722	-0.16711	0.400417	-0.19734	-0.295952	0.0319388	0.0770825	0.337321	-0.256242	0.340475	0.0152586	-0.199641
it_002	CD2_HUMAN	-0.366038	0.905896	0.0192937	-0.0297817	0.104677	-0.376012	-0.196416	-0.134807	0.145441	-0.122325	0.166129	0.0930586	-0.0419279	-0.351935	0.0761194	-0.295518
it_002	CD2_HUMAN	-0.289597	-0.0730416	-0.120975	-0.0106547	-0.170375	-0.377571	0.411893	-0.017679	0.175751	-0.127383	0.207453	0.369224	-0.12195	-0.314436	-0.0428208	-0.0793013
it_003	CD3E_HUMAN	-0.279931	-0.167189	-0.00338613	0.786262	0.519645	0.886264	-0.726183	2.31714	0.394386	-0.410272	0.608521	0.56966	0.839844	1.48417	0.708058	-0.128715
it_003	CD3E_HUMAN	-0.165969	-0.0820488	0.0387186	0.800865	0.457528	0.951457	-0.723572	2.57159	0.23398	-0.498647	0.475923	0.236512	0.631006	1.40039	0.71597	-0.170604
it_004	CD4_HUMAN	-1.01027	-0.00969185	-0.244737	0.73897	0.177705	0.1567	-1.48941	-0.0468995	0.0981056	-0.0524914	-0.226842	0.579013	0.233322	-0.410424	-0.0158039	8.93376e-05
it_004	CD4_HUMAN	-1.01623	0.0451113	-0.269724	0.762181	0.167807	0.0936943	-1.64105	0.0151544	0.199976	-0.0529654	-0.245654	0.881856	0.172233	-0.352559	0.645651	0.122625
it_005	CD5_HUMAN	-0.431294	-0.163312	0.0362075	0.139043	-0.352317	-0.262308	-0.250257	-0.352332	0.119448	-0.363417	0.013808	0.092947	-0.207744	-0.0403833	-0.182514	-0.130781
it_005	CD5_HUMAN	-0.31067	-0.0759225	0.0788766	0.14321	-0.294507	-0.498189	-0.317964	-0.330134	0.230637	-0.319707	0.0893562	0.130879	-0.259715	0.0162197	-0.0545941	-0.0609232
it_006	CD6_HUMAN	-0.453677	0.533654	0.0167869	-0.242705	0.0306668	-0.556636	0.303413	-0.0713099	-0.074902	0.144044	0.325641	0.413995	-0.0494745	0.0584727	0.173705	-0.158134
it_006	CD6_HUMAN	-0.342921	0.0913319	0.0237261	-0.229014	-0.0351834	-0.376884	0.845052	-0.062062	0.122698	0.10766	0.364744	0.468627	-0.135877	-0.0614347	0.0853095	-0.11517
it_007	CD7_HUMAN	-0.106432	0.241757	0.417182	0.216929	-0.0349758	0.38746	0.773753	0.0744346	0.125852	0.0979919	0.677451	0.71945	0.0416678	0.854825	0.273895	0.184768
it_007	CD7_HUMAN	0.0284866	0.391164	0.47185	0.307684	-0.0813404	0.372924	1.28616	0.217684	0.0351658	0.203863	0.790047	1.16947	0.015245	0.820249	0.367012	0.376915
it_008	CD8A_HUMAN	-1.72561	0.995697	-0.727267	-0.532592	0.578617	0.407753	-0.169135	0.552226	0.0570815	0.350426	0.304388	1.29867	1.1783	-0.561973	-0.670393	0.371128
it_008	CD8A_HUMAN	-1.4804	1.3142	-0.690694	-0.502039	0.581933	0.409401	0.0496921	0.753106	0.198011	0.185188	0.266279	1.10619	1.23245	-0.904556	-0.779238	0.326261
it_009	CD9_HUMAN	-0.349708	0.0988455	-0.0847767	-0.0106681	-0.131052	-0.279481	-0.206939	-0.213153	-0.316858	-0.0926005	0.140655	0.220066	-0.217697	0.138618	-0.142255	0.576332
it_009	CD9_HUMAN	-0.329699	0.28647	0.0158397	0.00612338	-0.0908774	-0.219007	0.0190564	-0.155118	-0.215962	-0.0103524	0.0415076	0.169656	-0.269052	0.152518	-0.0112366	0.612948
it_010	NEP_HUMAN	-0.454115	0.0621257	0.18907	-0.0253662	-0.0230048	-0.41385	0.586132	0.0613683	-0.130157	0.264341	0.149644	0.457464	-0.247419	0.265129	0.364579	-0.16598
it_010	NEP_HUMAN	-0.530981	0.0233142	0.379231	0.0127001	-0.0993209	-0.274396	0.189688	0.00159745	0.0497143	0.210756	0.449212	0.558632	-0.202666	0.240277	0.225121	-0.176307
it_011	CD11A_HUMAN	-0.469053	-0.216398	0.0751858	0.238154	0.219284	-0.335746	0.0163879	-0.141467	0.0369574	-0.0594905	0.125169	0.13786	0.0665006	0.0152913	0.653741	-0.149638
it_011	CD11A_HUMAN	0.358519	0.0261476	-0.0564696	0.307336	0.108484	-0.185757	-0.0250025	-0.0604619	-0.0424704	-0.155037	0.124825	0.201916	0.154948	-0.020953	0.679321	-0.141338
it_012	CD11B_HUMAN	-1.47277	1.00406	-0.454276	-0.17303	0.86687	3.55516	-0.304326	-0.241513	0.00857445	0.0923419	-0.0215835	0.680794	0.84094	-0.726134	-1.54098	0.00539655
it_012	CD11B_HUMAN	-1.1727	1.53489	-0.225124	-0.174291	0.859225	3.83948	-0.272539	-0.071382	-0.02597	0.0073534	0.0576742	0.497152	0.567558	-0.630106	-1.13094	-0.0555289
it_013	ITAX_HUMAN	-0.3039	0.486999	0.156733	-0.106931	-0.246849	0.81993	0.160344	-0.197786	-0.540007	-0.203938	-0.176337	0.0428992	-0.37837	-0.0730292	0.810424	0.305553
it_013	ITAX_HUMAN	-0.171703	0.835939	0.346084	-0.0363355	-0.145352	0.791583	0.478422	1.59174	-0.330752	-0.183532	-0.0892847	0.0333823	-0.389463	-0.132691	0.0196695	0.6178
it_014	AMPN_HUMAN	0.110076	0.418374	0.0248871	0.0707734	0.14001	-0.0909574	0.245485	-0.0741964	-0.117035	-0.0740902	0.220188	0.126763	0.109557	0.140724	-0.0259389	0.170252
it_014	AMPN_HUMAN	0.123353	0.469998	0.136362	0.142606	-0.0447493	-0.541175	0.280153	-0.102267	0.0343987	-0.0545597	0.175662	0.134182	-0.00616519	0.215418	0.0564438	0.601206
it_015	CD14_HUMAN	0.147551	0.378049	0.229208	-0.0355375	-0.165818	-0.334706	0.311079	0.518851	0.0811337	0.00896143	0.103384	1.31581	-0.168402	-0.0644633	0.407661	0.103535
it_015	CD14_HUMAN	0.147852	0.474955	0.287797	-0.0563943	-0.258232	-0.0852644	0.558005	0.143248	-0.0401428	-0.044755	0.0560327	0.116783	-0.329495	-0.172362	0.498471	0.500083
it_016	CD15	-0.0522672	-0.309924	-0.271032	-0.162179	0.191816	-0.443219	-0.615316	-0.70339	-0.302629	-0.490145	0.170591	-0.987867	-0.242084	-0.877202	-1.14563	-0.0651725
it_016	CD15	-0.304086	-0.440954	-0.44805	-0.181166	0.018633	-0.425129	-0.213465	-0.637857	-0.468043	-0.423437	0.283871	-1.19602	-0.182203	-0.810315	-0.349294	-0.0890111
it_017	FCG3A_HUMAN	-0.344487	0.474012	0.374331	0.114038	-0.602245	0.296545	0.387117	-0.0415865	0.198858	0.101614	0.640986	1.04797	-0.127488	0.78216	0.159525	-0.173709
it_017	FCG3A_HUMAN	-0.387386	0.71178	0.546529	0.15167	-0.144351	0.361844	0.971124	-0.115646	0.187537	0.423207	0.759913	1.40529	0.0672499	-0.114325	0.308147	-0.155387
it_018	FCG3B_HUMAN	-0.210407	-0.28567	-0.157175	-0.102986	0.129543	-0.0155122	-0.306841	-0.0710399	-0.0719777	-0.160788	0.0200805	-0.0598873	0.0483375	-0.208477	-0.256641	-0.0654187
it_018	FCG3B_HUMAN	-0.200577	-0.246626	-0.163971	-0.0709732	0.151746	-0.0422429	-0.228163	-0.0564077	0.0545771	-0.048229	0.0531022	-0.0223888	-0.0128249	-0.204948	-0.157256	0.0033617
it_019	CD17	-0.00913178	-0.237076	-0.0855326	-0.0939596	-0.301841	-0.331463	-0.415806	-0.0869872	0.160121	-0.198189	-0.423271	-0.253651	-0.170231	-0.365721	-0.298962	-0.170945
it_019	CD17	0.017491	-0.160374	-0.203073	-0.0621453	-0.333491	-0.439457	-0.567527	0.0161406	-0.00326761	-0.00654863	-0.267096	-0.16202	-0.191719	-0.257356	-0.0348631	-0.229711
it_020	ITB2_HUMAN	-0.631938	-0.132488	0.197562	0.428809	-0.802504	-0.0847448	-0.24347	0.525574	-0.983921	-0.273995	-0.174229	0.219378	-0.44956	0.538414	-0.765111	-0.156961
it_020	ITB2_HUMAN	-1.0043	0.127782	0.234609	0.397933	-0.593707	0.190069	-0.535465	0.745329	-0.660605	0.151287	0.0974627	0.68921	-0.525337	0.552195	-0.888895	0.0603646
it_021	CD19_HUMAN	-0.112199	-0.166046	0.251378	0.0966933	-0.140629	-0.365388	0.28328	-0.344635	0.0931757	-0.280237	0.0790695	0.0741582	-0.0764632	0.068543	0.375068	-0.198504
it_021	CD19_HUMAN	-0.279541	-0.0786647	0.273541	0.205273	-0.264188	-0.353085	0.460396	-0.131877	-0.020515	-0.176306	0.183652	0.0498273	-0.0704585	0.275255	0.281676	-0.164254
it_022	CD20_HUMAN	1.06399	0.598318	0.172082	0.567982	0.397	0.785907	0.55909	0.267646	0.325455	0.032436	0.43353	0.214511	0.0905825	0.0825109	0.506784	-0.0285003
it_022	CD20_HUMAN	0.518913	2.00726	0.273015	0.689786	0.325797	1.9753	1.17141	0.406237	0.336095	0.0892928	0.606466	0.248203	0.0790995	0.183727	0.979434	0.0498204
it_023	CR2_HUMAN	-0.070135	0.0371542	0.135968	0.216442	0.0186291	-0.376749	0.471302	-0.127533	0.202207	-0.00801797	0.214132	0.176703	-0.103543	0.0907012	0.278394	-0.0948429
it_023	CR2_HUMAN	-0.0613914	0.138204	0.241679	0.238776	0.0485818	-0.211124	0.408656	0.0295245	0.0858953	0.0761924	0.509814	0.531682	-0.203249	0.251043	0.466512	-0.0573127
it_024	CD22_HUMAN	-0.231766	0.474335	-0.294866	0.108472	0.32256	-0.0728459	0.111169	-0.0884638	0.584334	-0.223588	0.335409	0.285385	0.0548397	-0.103689	0.507636	-0.180181
it_024	CD22_HUMAN	0.00764936	0.899132	-0.390575	0.122475	0.524712	0.0721428	0.569538	0.145124	0.383901	-0.245093	0.558719	0.440059	0.271164	-0.15576	0.431997	-0.117478
it_025	FCER2_HUMAN	0.0309051	0.0190031	0.0102373	0.0526673	-0.033803	-0.94758	0.0226898	-0.103619	-0.0273719	-0.0500525	0.154509	0.0741559	-0.0109618	0.167614	0.234544	-0.0934939
it_025	FCER2_HUMAN	-0.070836	0.124853	0.361452	0.397645	0.193766	-0.90365	0.10813	0.0082346	0.0116266	-0.0426555	0.161266	0.0836653	-0.0815095	0.0342751	0.32581	-0.0123931
it_026	CD24_HUMAN	-0.0559716	0.120891	0.114965	-0.345088	-0.124849	-0.190586	0.410432	0.105687	-0.0433766	0.0346664	0.0942705	0.338522	-0.0734946	0.677409	0.521898	0.0277575
it_026	CD24_HUMAN	-0.206874	0.317422	0.385109	-0.175326	0.00416231	-0.126257	1.31252	-0.178738	-0.207388	0.0141982	0.210956	0.595916	-0.082651	0.924528	0.517812	0.0845347
it_027	IL2RA_HUMAN	-0.0129621	-0.176	-0.00115504	0.562399	-0.400482	-0.270127	-0.110667	-0.1923	0.0569727	-0.244473	-0.0527998	-0.141364	0.0131605	-0.142401	0.0580661	-0.142886
it_027	IL2RA_HUMAN	0.162346	-0.213514	-0.0553828	0.626363	-0.15466	-0.230482	-0.0440737	-0.169556	-0.000732148	-0.406088	-0.119185	-0.146658	-0.048123	-0.188037	0.123692	-0.0683652
it_028	DPP4_HUMAN	-0.585058	0.278789	0.0570513	-0.0642529	-0.239283	-0.219032	-0.398542	0.041927	0.121735	-0.218099	-0.678786	0.959547	0.125096	-0.372849	-0.315273	-0.0270843
it_028	DPP4_HUMAN	-0.930709	0.590235	0.146405	-0.0465972	-0.625935	-0.198474	-0.514762	0.359717	0.215983	-0.155283	-0.774952	1.89281	0.171657	-0.0926272	-0.444034	0.0531408
it_029	CD27_HUMAN	-2.41172	2.21837	-1.71365	-1.33735	2.99131	0.181871	-1.00409	0.154412	0.547214	1.31953	-0.109101	1.94483	2.12639	-1.93111	-2.69351	1.09444
it_029	CD27_HUMAN	-2.26909	1.95344	-1.91396	-1.47331	3.10208	0.258971	-0.854305	0.0604744	0.557155	1.56231	0.221909	2.22247	2.54534	-1.55069	-2.66547	1.11035
it_030	CD28_HUMAN	0.136199	0.48247	-0.00946108	0.0330345	0.389654	0.0445653	-0.0220292	0.0169325	0.0104463	0.0976989	0.22908	0.118673	0.216552	0.0727002	-0.122596	0.6498
it_030	CD28_HUMAN	0.160772	0.430428	0.133957	0.109456	0.36957	0.021395	0.0682374	0.017221	0.137072	0.0938932	0.0740942	0.124627	0.110027	0.0477195	-0.0437949	0.648261
it_031	ITB1_HUMAN	-0.626108	-0.53535	-0.752182	-0.695861	-1.56291	-0.549262	-0.567692	-0.0259061	-0.177896	1.83428	-0.569556	-0.246415	-1.43449	0.385195	0.785414	-0.18073
it_031	ITB1_HUMAN	-0.252653	-0.498042	-0.906069	-0.630716	-1.64899	-0.468124	-0.534412	0.0569751	-0.161711	2.30234	-0.637118	-0.429484	-1.46315	0.252324	1.08864	-0.168455
it_032	TNR8_HUMAN	-3.17602	0.993802	-1.49721	-1.44168	2.33575	-0.131127	-1.0094	-0.0462556	-0.203458	0.47037	-0.0958942	1.38788	1.52151	-1.20615	-3.1984	0.49795
it_032	TNR8_HUMAN	-2.83703	1.8932	-1.51445	-1.47838	2.6263	0.192108	-0.348714	0.726896	0.537121	1.12016	0.388247	1.60752	0.77264	-1.49411	-3.22456	0.994155
it_033	PECA1_HUMAN	-1.20102	-0.0452161	-0.176351	0.024898	0.0102765	-0.484805	-0.206708	0.136577	0.0318723	-0.0779937	-0.294262	0.184657	0.0779554	-0.427811	0.21731	-0.234044
it_033	PECA1_HUMAN	-1.13585	0.0138694	-0.0277381	0.0508522	0.0108824	-0.479175	0.0437981	0.233453	-0.0153553	-0.0614409	-0.192282	0.233697	0.00725701	-0.449493	0.554465	-0.14067
it_034	FCG2A_HUMAN	-0.483821	-0.186491	0.0248869	1.16096	-0.244423	0.0620137	-1.36816	0.0955355	-0.201579	0.00737276	-0.572867	0.913357	-0.453032	0.851523	-0.42946	0.0621963
it_034	FCG2A_HUMAN	-0.338096	-0.120237	-0.0239837	1.01992	-0.327931	-0.0860804	-1.74095	0.113543	-0.0472927	0.118439	-0.507639	0.78272	-0.561489	0.376684	-0.255774	0.304145
it_035	CD33_HUMAN	-0.223867	0.86838	-0.0677427	0.116106	-0.0288671	-0.387774	-0.344693	1.84908	-0.110688	0.796021	-0.354613	-0.131051	0.333458	-0.596162	-0.744299	-0.102974
it_035	CD33_HUMAN	-0.28645	1.37007	-0.189758	0.143216	-0.153642	-0.390405	-0.469484	1.40193	-0.106006	1.01661	-0.409908	-0.202224	0.129475	-0.689942	-0.76386	-0.049979
it_036	CD34_HUMAN	-0.168353	-0.00100094	0.0653525	0.00981965	-0.197	-0.354925	0.103699	-0.0206228	0.0613131	-0.0639734	0.0467922	0.209638	-0.071755	-0.12229	-0.151692	-0.139076
it_036	CD34_HUMAN	-0.233947	0.106605	-0.0490243	-0.0563252	-0.265309	-0.33402	0.369399	-0.0353138	0.2014	0.111303	0.0949714	0.245849	-0.210956	-0.0119689	0.0125604	0.0231124
it_037	CR1_HUMAN	-2.04278	0.148825	-0.264453	-0.0316494	0.757915	0.593995	-0.607643	1.46645	0.852887	0.0268089	-0.719838	1.23067	-0.31704	0.727187	-1.62442	-0.107744
it_037	CR1_HUMAN	-2.50966	0.17137	-0.289486	0.0454756	0.728627	0.855358	-0.371309	1.60116	0.470235	-0.0169249	-0.806405	1.31206	-0.276101	0.74517	-1.374	-0.00638146
it_038	CD36_HUMAN	-0.0661557	-0.361494	-0.106341	-0.0519992	-0.00587959	-0.0830943	-0.103402	-0.160748	-0.00475998	-0.178087	0.0727943	-0.247697	0.0793649	-0.121612	0.0193523	-0.14396
it_038	CD36_HUMAN	-0.00648558	-0.372829	-0.110682	-0.0575285	-0.0523888	-0.151801	-0.0494275	-0.10942	0.0290336	-0.0793861	-0.0228233	-0.194041	-0.0282202	-0.196116	0.0668823	-0.0888999
it_039	CD37_HUMAN	-0.008715	0.23057	-0.169433	0.431664	0.266945	-0.0561338	-0.58137	0.296884	0.386601	-0.184812	-0.107278	-0.118076	0.350812	-0.639266	0.781392	0.041715
it_039	CD37_HUMAN	0.122228	0.456698	-0.16489	0.475918	0.120647	-0.101097	-0.406241	0.361334	0.329688	-0.142912	-0.0776151	-0.156718	0.292883	-0.766929	0.881462	0.106621
it_040	CD38_HUMAN	-0.564085	0.108334	-0.0607458	0.664132	1.19218	1.03586	-1.06718	-0.222428	1.28876	-0.217923	0.0645019	-0.342261	1.1955	1.03252	0.494341	0.208096
it_040	CD38_HUMAN	-0.525234	0.0836181	-0.101318	0.623939	1.37324	0.983048	-0.893154	-0.164169	1.60308	-0.349396	0.0358233	0.0886993	1.55117	0.955671	0.660274	0.214827
it_041	TNR5_HUMAN	-0.18568	1.01053	0.248791	0.130319	-0.0235398	-0.131991	-0.364928	0.141893	0.216601	-0.20721	-0.0960179	-0.0656498	0.0521021	-0.385217	0.0289351	-0.107835
it_041	TNR5_HUMAN	-0.0530612	1.301	0.183093	0.0853469	-0.143963	1.8365e-05	0.213963	0.130732	0.344723	0.00052145	-0.0140657	0.0195228	-0.0704172	-0.0794468	0.327046	-0.0278423
it_042	ITA2B_HUMAN	-0.0807181	0.526605	0.381628	0.125793	-0.124609	-0.0665055	0.0663817	0.300929	0.0772715	0.294669	0.267977	0.547527	-0.0475626	0.177677	0.465001	0.0231768
it_042	ITA2B_HUMAN	-0.212208	0.457973	0.385287	0.129608	-0.104863	-0.122756	0.347367	0.311645	0.242794	0.256603	0.366745	0.723363	-0.0473379	0.386293	0.423011	0.0412828
it_043	ITA2B_HUMAN	0.121849	0.170567	0.413214	0.050267	-0.0122585	-0.251251	-0.170932	0.871979	-0.128837	-0.334315	-0.200558	0.0662189	-0.27944	-0.444861	0.0115783	-0.203979
it_043	ITA2B_HUMAN	-0.341457	0.478031	0.389723	0.0145114	-0.135227	-0.246896	-0.424516	0.745536	-0.123704	-0.189384	-0.22081	0.0761539	-0.388419	-0.102319	0.25044	-0.293245
it_044	GP1BA_HUMAN	-0.0826689	0.147824	-0.0297232	0.180583	0.707141	-0.788472	0.141609	0.300315	0.0963924	0.0106167	0.269567	0.187925	-0.0106636	-0.0764776	-0.106507	0.0222766
it_044	GP1BA_HUMAN	-0.0501797	-0.0764344	-0.115871	0.131348	1.09389	-0.827772	0.228857	0.418401	0.202054	0.349314	0.516283	0.200203	0.0274497	0.088984	0.0915456	0.474002
it_045	LEUK_HUMAN	0.0769952	1.23577	0.300345	-0.44152	0.220919	-0.374337	0.740579	0.122158	0.618446	0.114828	0.0983264	0.389761	-0.269559	-0.583794	0.122253	0.347881
it_045	LEUK_HUMAN	0.182225	2.04456	0.308612	-0.491269	0.275388	-0.421116	0.94884	0.20397	0.579214	0.206417	0.294258	0.47283	-0.0586726	-0.703691	-0.12415	0.667249
it_046	CD44_HUMAN	0.439319	0.50035	0.360832	0.117126	0.00331647	0.0402419	0.743148	0.665434	0.355759	0.380653	0.321145	0.377569	0.171125	-0.298778	1.28441	0.115202
it_046	CD44_HUMAN	0.259198	0.558336	0.64327	0.228021	0.336231	-0.292855	0.51158	0.678987	0.428627	0.240927	0.389764	0.4233	0.183669	-0.286822	1.23832	0.556498
it_047	PTPRC_HUMAN	-0.106986	0.155359	0.298621	0.365397	0.584483	0.224087	-0.0107628	0.590246	0.106516	0.349018	0.329437	0.581197	0.819613	-0.106927	1.01722	-0.254123
it_047	PTPRC_HUMAN	0.054176	0.135451	0.740659	0.38876	0.794906	0.383248	0.230588	0.498974	0.501117	0.214769	0.382775	0.675623	0.771489	-0.264729	1.29648	0.0886846
it_048	PTPRC_HUMAN	-1.46097	-1.21134	-1.70907	-3.63476	-1.54372	-1.37065	-0.727936	-0.935222	-1.68954	-2.01205	-1.8751	-0.356989	-0.658556	-2.00524	-3.19867	-1.43949
it_048	PTPRC_HUMAN	-1.41017	-1.07977	-1.89025	-3.77305	-1.80041	-1.22703	-0.308439	-0.835924	-1.38321	-1.88002	-1.32015	-0.43686	-1.39335	-2.25846	-2.61579	-1.24948
it_049	PTPRC_HUMAN	-1.14056	2.20162	1.80559	0.107819	0.495451	1.05964	-0.490773	-0.171698	-0.0086564	-0.172952	-0.00624854	-0.092435	0.183873	-0.150524	-0.373338	0.272297
it_049	PTPRC_HUMAN	-1.02539	1.69768	1.4754	0.148806	0.666335	0.834776	-0.410163	-0.149153	-0.0160369	-0.171607	0.0123667	-0.0900308	0.200692	-0.193684	-0.404273	0.215729
it_050	PTPRC_HUMAN	-0.770581	0.160559	-0.458081	-0.141592	0.278919	-0.265903	-0.666933	-0.543098	-0.114119	-0.283786	-0.117707	-0.456181	-0.122275	-0.475466	-0.39785	-0.182217
it_050	PTPRC_HUMAN	-0.747526	0.262489	-0.192593	-0.203667	0.306436	-0.257317	-0.49391	-0.547834	-0.203167	-0.3589	-0.0724368	-0.269017	-0.14469	-0.403836	-0.613708	-0.171161
it_051	MCP_HUMAN	-1.87113	1.68707	-1.02787	-1.15467	1.18354	0.167184	0.106415	-0.150385	-0.149005	0.614158	0.83344	1.43372	1.2903	-0.407719	-1.43688	-0.0558373
it_051	MCP_HUMAN	-1.99727	1.643	-0.831035	-1.0893	1.20204	0.209475	0.378501	-0.0824283	0.0402402	0.553532	0.927973	1.38634	1.31325	-0.29879	-1.53926	0.0753462
it_052	CD47_HUMAN	-0.340555	-0.272213	-0.232864	-0.210266	0.178227	-0.188865	-0.552163	-0.102406	-0.0309729	-0.122064	-0.22126	-0.16088	0.147963	-0.761888	-0.545454	-0.235609
it_052	CD47_HUMAN	-0.182508	-0.283814	-0.190307	-0.1581	0.141395	-0.159763	-0.2545	0.169164	0.219033	0.194647	-0.0832749	0.0984267	0.0978898	-0.798942	-0.438784	-0.244722
it_053	CD47_HUMAN	-0.00176927	0.332228	-0.0244003	0.285749	-0.165007	2.4689	-0.32914	-0.134133	0.163146	-0.184314	-0.125447	-0.154593	-0.140168	-0.0833188	0.0637886	-0.100114
it_053	CD47_HUMAN	-0.18611	0.356931	0.0326223	0.330569	-0.238181	2.47072	-0.222623	0.102766	-0.109765	-0.26674	-0.100211	-0.107128	-0.0755995	-0.0484993	0.455841	-0.132366
it_054	ITA4_HUMAN	0.129014	0.0846441	0.0478233	0.325506	0.515453	-0.181336	-0.257109	-0.287091	0.55631	0.38612	0.360819	-0.397486	0.603691	0.542548	-0.465773	-0.293654
it_054	ITA4_HUMAN	-0.131266	0.161773	0.00457551	0.284715	0.561157	-0.268791	-0.190096	-0.204349	0.610037	0.414702	0.414014	-0.190069	0.104024	0.594795	-0.430272	-0.250909
it_055	ITA5_HUMAN	-1.44552	0.981607	-0.617688	-0.232769	0.700232	0.00965113	-0.15294	-0.33092	-0.201701	0.1201	-0.0957032	0.412352	0.365228	-0.601831	-0.99653	-0.205295
it_055	ITA5_HUMAN	-1.38973	1.38971	-0.572187	-0.304387	0.841529	0.109657	-0.252865	-0.320534	-0.151213	0.025373	0.0851024	0.51498	0.324489	-0.360761	-1.30766	-0.107068
it_056	ITA6_HUMAN	0.287253	0.1527	0.162295	0.207493	-0.0446943	3.91362	-0.071324	-0.071694	-0.0178967	-0.359482	-0.00749544	-0.111329	0.0374554	-0.0805949	0.142414	-0.0597712
it_056	ITA6_HUMAN	0.0934028	0.860477	0.078147	0.168088	-0.0456253	3.89059	0.298031	-0.0321473	0.0458655	-0.153293	0.178239	-0.0222132	0.15463	0.255225	0.601072	-0.0557805
it_057	ICAM3_HUMAN	-5.13541	0.503573	2.8279	0.87866	0.775555	2.28101	-2.54173	6.17743	-2.59265	-0.0587451	-0.877064	-0.590407	-0.142601	1.1348	-1.96686	1.61385
it_057	ICAM3_HUMAN	-4.87569	0.630507	3.11996	0.956086	0.866456	2.4095	-2.70808	6.39133	-2.57611	0.317217	-1.17544	-0.270863	-0.15989	1.20447	-1.83691	1.47205
it_058	ITAV_HUMAN	-0.158785	-0.416742	-0.0806935	0.157767	-0.332926	-0.346957	-0.631671	-0.555434	-0.326735	-0.543042	-0.411173	-0.512228	-0.239786	-0.395787	-0.253657	-0.400286
it_058	ITAV_HUMAN	-0.306162	-0.176779	-0.386067	0.246923	-0.4119	-0.381955	-0.427057	-0.594426	-0.175582	-0.60611	-0.465065	-0.606571	-0.314717	-0.365875	-0.118804	-0.417717
it_059	CD52_HUMAN	-2.63127	1.69307	-1.40006	-0.909521	1.86458	-0.0220697	-0.73971	-0.323699	0.76673	0.792299	0.118728	1.30646	1.53426	-2.08672	-2.26196	1.58902
it_059	CD52_HUMAN	-2.28748	2.07932	-1.16597	-0.918039	1.88973	0.0447267	-0.480634	-0.304308	1.10603	0.632399	0.11053	1.18565	1.35711	-2.00945	-2.30041	1.99062
it_060	CD53_HUMAN	-0.164408	-0.134829	-0.0119595	-0.00866858	0.244484	-0.0419208	0.118095	-0.175335	-0.0685365	-0.0872418	0.212173	-0.0868205	0.206493	0.00961797	-0.210365	-0.0378821
it_060	CD53_HUMAN	-0.00591635	-0.195858	-0.0663499	0.0648562	0.136762	-0.0593427	0.279693	-0.256665	-0.0556482	-0.0321426	0.178919	-0.0993029	0.117333	-0.00655152	-0.0936196	0.0203472
it_061	ICAM1_HUMAN	0.524844	1.11772	0.0970949	-0.0546418	0.383956	1.67097	-0.902145	0.120544	0.69761	0.0796419	-0.593454	-0.261477	-0.0732495	-0.816064	0.134539	0.257697
it_061	ICAM1_HUMAN	1.12954	0.961253	-0.0323231	0.0738267	0.426382	2.82239	-0.724371	0.0625417	0.713931	-0.0966052	-0.54853	-0.452703	0.103015	-0.0794654	-0.10538	0.163126
it_062	DAF_HUMAN	-1.06263	1.02847	0.0276769	-0.236806	0.671722	0.211137	0.151369	-0.212034	0.206544	0.422033	0.372053	0.757264	0.797368	-0.764478	-1.34156	0.405259
it_062	DAF_HUMAN	-1.35573	1.25584	0.00438066	-0.303474	0.88292	0.229135	0.491043	0.0242951	0.0656413	0.298759	0.451386	0.996438	1.1988	-0.591566	-1.17411	0.491185
it_063	NCAM1_HUMAN	-0.129948	0.0991752	0.20788	-0.0567562	-0.0254986	-0.215106	0.12876	-0.10036	0.327148	-0.153174	0.222424	0.131046	-0.0463019	0.0725827	0.290818	0.397414
it_063	NCAM1_HUMAN	-0.0956424	0.498644	0.646271	0.0522093	0.0816596	-0.0431112	0.223274	-0.100646	0.05562	-0.021236	0.23027	0.186995	-0.0646883	0.229575	0.327828	0.570203
it_064	CD57	-0.378408	-0.0877675	-0.107614	0.221668	0.0876163	-0.454904	-0.854512	-0.370116	-0.102815	-0.362463	-0.304959	-0.263164	-0.0294352	-0.430154	-0.150734	0.198727
it_064	CD57	-0.102324	0.39735	0.230466	0.380631	0.0971067	-0.387795	-0.561632	0.281381	0.29042	0.277401	0.0467959	0.042279	0.0701182	-0.170233	0.175202	0.625748
it_065	LFA3_HUMAN	-0.327559	-0.285482	-0.0593197	0.0754195	-0.291755	-0.347006	0.0569547	-0.184396	-0.135833	0.165627	-0.0360628	0.35976	-0.420457	-0.00539141	0.193895	-0.294893
it_065	LFA3_HUMAN	-0.397341	-0.200812	0.0475303	0.106929	-0.337868	-0.471529	0.212509	0.167496	0.0642756	0.0572838	0.0794402	0.409605	-0.765188	-0.0329378	0.273671	-0.265698
it_066	CD59_HUMAN	-0.0946612	-0.36847	0.0630277	0.436485	-0.708655	-0.398411	-0.189507	-0.221307	-0.112052	-0.115239	-0.197103	-0.203768	-0.499093	0.00503577	0.238327	-0.344522
it_066	CD59_HUMAN	-0.0918965	-0.358659	0.165166	0.390432	-0.78318	-0.478902	-0.220758	-0.227665	-0.245806	-0.0947747	-0.23869	-0.262805	-0.397172	-0.242788	0.352737	-0.0606789
it_067	ITB3_HUMAN	-0.483304	-0.0680476	0.0139046	0.0980902	-0.158555	-0.682056	0.343183	0.152854	-0.413972	0.0300856	0.135818	0.314724	-0.185123	0.0386097	0.481608	-0.292233
it_067	ITB3_HUMAN	-0.438485	0.0146422	-0.0744274	0.0713734	-0.0281278	-0.484593	0.281552	0.159707	-0.450133	0.0227733	0.188019	0.443617	-0.0147853	-0.11477	0.359348	-0.366157
it_068	LYAM2_HUMAN	-0.144772	0.319722	0.0535618	0.146163	-0.133602	2.21365	-0.417503	-0.106147	-0.127059	-0.304051	-0.0688968	-0.127692	0.0448691	0.223695	-0.156042	0.291857
it_068	LYAM2_HUMAN	-0.0841534	0.195443	0.000653178	0.0913206	-0.19302	2.1165	-0.342185	-0.0397969	-0.106431	-0.348113	-0.127678	-0.155057	0.0103022	0.0998957	0.19162	0.305405
it_069	LYAM1_HUMAN	0.00651735	-0.276941	-0.0458799	0.16165	-0.425704	-0.499359	-0.156583	-0.346296	-0.0714075	-0.212909	-0.177589	-0.152501	-0.459352	-0.046353	0.0471238	-0.183547
it_069	LYAM1_HUMAN	0.126878	-0.175191	0.127588	0.207989	-0.5503	-0.444539	-0.0116777	-0.308815	-0.329571	-0.143866	-0.149289	-0.164022	-0.362601	0.10067	0.0615028	-0.150281
it_070	LYAM3_HUMAN	0.184646	0.685925	0.0683414	0.116522	-0.155411	4.56684	0.0468604	0.160424	0.0937699	-0.0624139	-0.0070537	0.0437042	0.0194577	-0.0697565	0.150738	0.0220449
it_070	LYAM3_HUMAN	0.263899	1.16516	0.159978	0.0862088	-0.237567	4.81817	0.51729	0.183245	0.122854	0.0514044	0.172582	0.165272	-0.0421959	0.201767	0.47811	0.0594735
it_071	CD63_HUMAN	-0.112973	-0.387726	-0.176641	0.00563108	-0.164329	-0.091262	-0.279737	-0.117056	0.0167821	-0.193526	-0.0588758	0.0967193	-0.302688	-0.113083	0.264919	-0.318496
it_071	CD63_HUMAN	0.0122036	-0.272651	-0.216702	-0.0281809	-0.137808	-0.130135	-0.417643	0.235676	-0.129445	-0.322589	-0.131386	0.0829138	-0.248113	-0.211027	0.148194	-0.293688
it_072	CEAM1_HUMAN	1.27736	0.213569	0.104748	0.108159	-0.290375	-0.470188	-0.00134118	-0.186364	-0.0512836	-0.27689	-0.06509	-0.038133	-0.344254	-0.034877	0.32584	-0.205452
it_072	CEAM1_HUMAN	2.06885	-0.0497235	0.0793577	0.0817689	-0.359387	-0.42248	-0.133522	-0.28455	0.0347484	-0.182366	-0.0972003	-0.0893181	-0.334885	-0.0475705	0.300188	-0.199624
it_073	CEAM8_HUMAN	-0.180851	1.55046	-0.0481687	-0.0849833	0.268337	-0.0890905	1.00061	0.138689	0.550876	-0.0313728	0.5245	0.850255	-0.153382	-0.366987	0.166532	0.0483952
it_073	CEAM8_HUMAN	-0.0719991	1.56329	0.446491	-0.0391866	0.059659	-0.149479	0.958767	0.411222	0.740979	0.0667184	0.83703	0.915999	-0.0580604	-0.171619	0.165826	0.0327501
it_074	CEAM5_HUMAN	0.168939	1.56178	0.170502	0.497543	0.422216	1.14284	0.0958112	0.394573	1.49515	0.0805729	0.231368	0.551895	0.6294	-1.26155	0.319713	0.126808
it_074	CEAM5_HUMAN	-0.000743495	1.97854	0.386644	0.566196	0.399421	1.36998	0.821214	0.492912	2.01403	0.234906	0.296074	0.704409	0.537669	-1.11471	0.469057	0.118253
it_075	CD69_HUMAN	0.185959	0.956113	0.974796	0.0163569	0.625522	2.2666	1.96727	0.60351	0.431037	0.696572	0.47922	1.29033	0.101652	0.800373	0.565781	0.274063
it_075	CD69_HUMAN	-0.199339	0.933126	0.795196	0.0799403	0.545647	2.06112	1.52945	0.496345	0.218561	0.714668	0.668961	1.28307	0.115547	0.822985	0.675901	0.376395
it_076	CD70_HUMAN	0.0849005	0.268597	0.138454	0.173525	-0.0346555	-0.46231	0.330699	-0.215883	0.125885	-0.151037	0.0871168	-0.0164628	0.018563	0.0278438	-0.0597566	0.0075153
it_076	CD70_HUMAN	0.125662	0.149706	0.00234612	0.144994	-0.0644388	-0.168793	0.56663	-0.0482153	0.0855389	-0.0269871	0.225744	0.0399256	-0.0673911	0.0620528	0.19332	-0.094497
it_077	TFR1_HUMAN	-0.0667212	0.0719542	-0.582992	-0.183414	-0.96611	-0.17572	-0.00922847	-0.334756	0.318564	1.78989	-0.120729	-0.273297	-0.758613	-0.16008	1.06209	0.114673
it_077	TFR1_HUMAN	0.492207	-0.0397146	-0.444995	-0.20806	-0.987715	-0.110394	0.191707	-0.363201	0.24232	1.69611	-0.146526	-0.146765	-0.847328	-0.149113	1.08127	0.367596
it_078	CD72_HUMAN	0.0352056	1.01462	0.283817	0.188678	0.20864	0.760049	-0.033508	0.0698787	0.208306	0.101317	0.197879	0.206338	0.103671	-0.120154	0.295331	0.167063
it_078	CD72_HUMAN	0.312934	0.863663	0.441793	0.32306	0.00070295	0.909125	0.441875	0.0382672	0.217955	0.0360216	0.35389	0.295908	0.053864	0.0168796	0.383412	0.751178
it_079	CD79A_HUMAN	-1.31059	0.494826	-0.249271	-0.110548	-0.0884381	-0.00148549	-1.22675	1.12398	0.98927	0.870687	-0.398688	0.79553	-0.3574	0.129679	-1.23636	-0.149468
it_079	CD79A_HUMAN	-1.23833	0.747015	-0.208774	-0.123637	-0.30575	-0.00580011	-1.2336	0.549805	1.034	1.21168	-0.457449	0.827415	-0.488381	0.0189308	-1.21858	0.130841
it_080	CD80_HUMAN	-0.0619454	0.505775	-0.0861539	-0.172967	0.369807	-0.192218	-0.236449	-0.0297684	0.310086	-0.271262	-0.128247	-0.0720137	-0.132554	0.00520939	-0.023447	0.178398
it_080	CD80_HUMAN	0.0360293	0.776372	0.348134	-0.241497	0.0660158	-0.201249	-0.419385	0.0232435	0.300784	-0.245814	-0.420315	-0.215585	-0.159584	-0.393266	0.529216	0.314531
it_081	CD81_HUMAN	-0.0748683	1.06483	0.237469	-0.0191162	0.188991	-0.134515	0.632897	0.184484	0.407322	0.13069	0.362583	0.368775	0.493294	-0.256652	-0.028331	-0.0947246
it_081	CD81_HUMAN	-0.0976344	1.12487	0.257953	-0.0264345	0.113832	-0.117007	1.02066	0.199155	0.546506	0.122722	0.528819	0.690992	0.52891	-0.114638	0.0428274	-0.0120293
it_082	CD86_HUMAN	0.113603	-0.390102	-0.0281552	0.246203	-0.534791	-0.526764	-0.567895	-0.402423	-0.0988884	-0.457806	-0.370573	-0.813547	-0.145257	-0.745143	0.155224	-0.437201
it_082	CD86_HUMAN	0.320889	-0.539658	-0.0402699	0.235556	-0.659531	-0.567206	-0.540146	-0.412101	-0.218077	-0.29417	-0.534082	-0.812444	-0.264536	-0.88843	0.029601	-0.332964
it_083	TNR6_HUMAN	-0.238479	-0.296832	-0.224534	-0.0933177	0.0907577	-0.109326	-0.403683	-0.152293	-0.208419	-0.131875	-0.142853	-0.0999461	0.00244279	-0.109193	-0.380751	-0.153331
it_083	TNR6_HUMAN	-0.168122	-0.234744	-0.228587	-0.0860028	-0.046457	-0.132811	-0.267222	-0.176521	0.0700262	-0.0363992	-0.102268	-0.0589243	-0.0791834	-0.0928434	-0.249333	-0.113652
it_084	CD97_HUMAN	-0.258601	-0.0619665	0.423042	-0.0451778	0.662799	-0.242249	0.271441	-0.146828	0.116164	0.0134908	0.281534	0.300817	0.0584532	0.24169	0.00818892	-0.162916
it_084	CD97_HUMAN	-0.245156	0.223457	0.116791	-0.0694641	0.810248	-0.0771512	0.320798	-0.00177041	0.231301	0.0913226	0.303422	0.488035	0.00165694	0.252993	0.196471	-0.0637565
it_085	4F2_HUMAN	-0.159109	-0.44873	-0.0638554	0.0454877	-0.41935	-0.220114	0.0942768	-0.525035	-0.248346	-0.342918	-0.229147	-0.38502	-0.423302	-0.14752	-0.101455	-0.389006
it_085	4F2_HUMAN	-0.120546	-0.196393	-0.0638676	0.0410667	-0.559566	-0.158991	-0.116143	-0.578638	-0.179455	-0.368569	-0.218808	-0.490404	-0.250917	-0.128049	-0.0478432	-0.411903
it_086	CD99_HUMAN	0.32462	-0.385252	-0.220351	0.446447	-0.596364	-0.334825	-0.959143	-0.338228	-0.17166	-0.469147	-0.180325	-0.518789	-0.590582	-0.130787	0.0735978	0.395155
it_086	CD99_HUMAN	0.405815	-0.422443	-0.201922	0.435856	-0.576312	-0.317478	-0.86397	-0.309683	-0.275448	-0.507132	-0.293879	-0.343706	-0.640247	-0.0554856	0.170718	0.378005
it_087	ITAE_HUMAN	-1.19762	0.033484	-1.05994	-0.762119	1.28621	0.0541725	-0.246832	-0.173968	-0.166435	0.12788	-0.0145902	0.163422	0.374147	-0.0102472	-1.40919	-0.0487922
it_087	ITAE_HUMAN	-1.40517	0.225161	-0.548777	-0.816191	1.78152	0.134887	-0.188515	-0.143331	-0.152442	0.328817	0.0489235	0.397111	0.586787	-0.276171	-1.50572	-0.0028107
it_088	VCAM1_HUMAN	-0.255653	-0.0621756	0.0797068	0.071988	-0.0443729	-0.352153	-0.275787	-0.286469	-0.244225	-0.28241	0.0316308	-0.0854312	-0.124206	-0.064193	-0.166831	-0.130375
it_088	VCAM1_HUMAN	-0.13057	-0.290549	0.146645	0.0417855	-0.205391	-0.430559	0.632849	-0.228106	-0.284355	-0.0565774	0.110934	0.0410441	-0.220142	0.268104	0.489276	-0.172943
it_089	SEM7A_HUMAN	0.00660261	-0.104154	0.185033	0.0269496	0.189755	0.0106864	0.0404247	-0.17308	0.0337387	0.0081938	0.036235	0.00350266	0.0773381	0.0871529	6.187e-05	-0.0129953
it_089	SEM7A_HUMAN	0.0728476	-0.0761068	-0.00586168	-0.0221273	0.170865	-0.0200245	0.0766379	-0.0651019	0.102457	0.0400217	0.0338178	0.0268854	0.0472881	0.0686677	-0.00627218	-0.0102016
it_090	CSF2R_HUMAN	0.0377856	-0.0143033	0.269027	-0.0702492	0.14851	-0.145255	0.704987	0.0350908	0.185063	0.224964	0.462055	0.534293	0.114162	0.119463	0.192648	0.00945935
it_090	CSF2R_HUMAN	-0.19132	0.0702597	0.432538	-0.0236683	0.154271	0.0906553	1.24436	0.0186488	0.21168	0.253245	0.572298	0.567534	0.113393	0.199758	0.329066	0.04877
it_091	IL2RB_HUMAN	-0.0449764	-0.042038	0.0117508	-0.0125407	0.176303	0.106674	-0.0260818	-0.158498	-0.0760519	-0.04254	0.0558864	-0.00462423	0.111281	0.0565683	-0.102284	-0.00272306
it_091	IL2RB_HUMAN	0.0474714	-0.110759	0.07977	-0.00427032	0.0906028	0.200593	0.0560829	-0.147899	0.065625	-0.0234116	0.0612749	3.71969e-05	0.0577605	0.0375593	-0.0173029	0.180768
it_092	CD123_HUMAN	-0.700079	1.07775	0.0622665	-0.155002	0.68825	0.113689	0.926412	0.120552	0.68606	0.0264205	0.32433	-0.0785304	0.375068	-0.546359	-1.16452	-0.0134668
it_092	CD123_HUMAN	-0.354676	1.73022	-0.0572919	-0.0698072	0.472445	0.253214	1.44953	0.207417	1.04022	-0.0277348	0.553395	-0.138893	0.387927	-0.613546	-0.821454	-0.0271766
it_093	IL3RB_HUMAN	0.00422197	0.759563	0.497329	-0.118195	0.120871	-0.0700499	1.26321	0.277941	0.390373	0.380691	0.237332	0.897863	-0.270538	-0.339075	0.0644272	0.730264
it_093	IL3RB_HUMAN	0.217296	1.06276	0.629267	-0.0866743	0.30987	0.28269	0.910299	0.326721	0.67715	0.447446	0.52063	1.31014	-0.0829806	-0.229	0.166048	0.892343
it_094	SDC1_HUMAN	-0.117776	-0.47741	-0.115972	0.165544	-0.368188	-0.225864	-0.530835	-0.272457	-0.182965	-0.533086	0.0552218	-0.182544	-0.369086	0.304404	-0.0590756	-0.00553104
it_094	SDC1_HUMAN	-0.195003	-0.475847	-0.0535244	0.230699	-0.4147	-0.0730838	-0.312842	-0.235443	-0.287084	-0.544319	-0.0209141	0.0565741	-0.511525	0.392894	0.0883468	0.102665
it_095	CD139	-0.348579	0.483573	-0.0148575	-0.0771888	0.307635	2.73488	0.301789	-0.0694059	0.075449	0.0202074	0.0068283	0.105879	0.229621	-0.525448	-0.340817	0.277241
it_095	CD139	-0.387294	0.602087	0.465871	0.0103182	0.273937	2.34484	0.158693	-0.0590936	0.362632	0.0471206	0.0170843	0.142487	0.193507	-0.627262	-0.354662	0.364589
it_096	BASI_HUMAN	-0.370212	1.20751	0.343153	0.0245221	0.089502	0.893353	0.703115	0.527046	0.581355	0.352336	0.259405	1.14526	-0.391337	-0.251375	0.35756	0.673165
it_096	BASI_HUMAN	-0.232263	1.92457	0.391651	0.103467	0.17243	0.879414	0.7954	0.497758	0.609273	0.558355	0.380731	1.40804	-0.556446	-0.57496	0.399904	0.973798
it_097	SELPL_HUMAN	0.0992804	1.44501	0.245447	-0.0599471	0.02886	0.00855726	-0.146183	0.0921942	0.597804	-0.115649	-0.138515	-0.0314502	0.0834018	-1.14608	-0.563554	-0.208538
it_097	SELPL_HUMAN	0.0631969	1.54797	0.382223	-0.0425253	0.0251395	0.141478	0.847789	0.0670828	0.999461	-0.0930923	-0.101245	-0.0306543	-0.014004	-1.4487	-0.539581	-0.153134
it_098	CD177_HUMAN	-0.0102833	-0.172727	-0.184518	-0.0587552	-0.198075	0.831354	-0.226126	-0.203799	-0.0142846	-0.181918	-0.197323	-0.177764	-0.113433	-0.0862985	-0.130215	-0.154755
it_098	CD177_HUMAN	0.0212469	-0.136366	-0.164126	-0.0021329	-0.222558	0.564939	-0.127512	-0.139758	0.0204156	-0.0309993	-0.125057	-0.108178	-0.202307	-0.128027	-0.0614187	0.163968
it_099	CCR5_HUMAN	-0.453084	-0.234515	-0.0202322	0.0413315	-0.460685	0.370642	-0.267208	0.725357	-0.702867	-0.0842954	-0.474247	0.0252825	-0.199072	0.83493	-0.453006	0.181145
it_099	CCR5_HUMAN	-0.52289	-0.172932	0.0239972	0.125547	-0.550127	0.322164	-0.211372	1.01194	-0.468136	-0.0370603	-0.346585	0.0940878	-0.292673	0.88416	-0.278242	0.220883
it_100	MPRI_HUMAN	-0.437745	0.373417	-0.150824	-1.43137	0.23331	0.313344	-0.776769	1.90559	2.21313	0.269416	-1.21583	0.148845	0.0580441	-0.379181	-0.328961	-0.357252
it_100	MPRI_HUMAN	-0.418813	0.424982	-0.282337	-1.34241	0.0462691	0.291219	-0.439435	2.39326	2.92431	0.721349	-1.34407	0.237095	-0.0422486	-0.311061	-0.0762391	-0.371848
it_101	GLPA_HUMAN	0.586547	-0.217755	0.0192488	-0.0158226	-0.318969	-0.405682	0.86523	-0.392792	-0.0426341	-0.344359	0.0731158	-0.0427385	-0.302089	0.131747	0.555227	-0.390218
it_101	GLPA_HUMAN	0.446187	-0.210709	0.275475	0.0235066	-0.455731	-0.383862	0.861892	-0.395922	-0.15929	-0.227675	0.0952283	-0.174961	-0.490342	0.0452756	0.624306	-0.384429
it_102	FITC	-0.595363	0.501102	-0.0171992	-0.459792	0.574361	-0.882986	-0.717117	1.43691	2.34454	0.826133	-0.930492	-0.306891	0.0962891	-0.717006	0.80899	-1.14047
it_102	FITC	-0.466134	1.48667	0.0199336	-0.492804	0.426447	-0.867418	-0.431411	2.24505	2.58945	0.67679	-1.21782	-0.178767	0.114472	-0.647411	1.07456	-1.17172
it_103	PRTN3_HUMAN	-0.458102	0.494966	-0.0992304	-1.48731	0.397634	0.498736	-0.693959	2.4191	2.4504	0.603879	-1.24741	0.159797	0.21374	-0.229378	-0.12278	-0.294864
it_103	PRTN3_HUMAN	-0.388713	0.542873	-0.128886	-1.54964	0.239715	0.526553	-0.334446	2.31521	2.94318	0.741679	-1.33419	0.232823	0.103465	-0.23854	0.00198423	-0.320943
it_104	BDNF_HUMAN	-0.18189	-0.382247	-0.283658	0.320427	-0.392424	-0.564867	-0.985632	-0.466613	-0.176799	-0.550828	-0.449588	-0.654236	-0.38778	-0.678942	-0.206581	-0.357092
it_104	BDNF_HUMAN	0.471429	-0.586747	-0.242305	0.326089	-0.70835	-0.628851	-0.744321	-0.423583	-0.180062	-0.384299	-0.670079	-0.890976	-0.72736	-0.71864	0.0537192	-0.605629
it_105	PGH1_HUMAN	0.225595	-0.190573	0.0566569	0.0231957	-0.00521816	-0.136358	0.290426	0.0125768	-0.10399	-0.100234	0.106888	-0.0359119	-0.0873221	-0.0924957	0.77502	-0.168651
it_105	PGH1_HUMAN	-0.0187985	-0.00730079	0.162986	0.253188	0.000339156	-0.287457	0.481595	0.0929672	0.0211868	-0.00622741	0.14301	-0.0116365	-0.11849	-0.100064	0.904326	-0.13184
it_106	dsDNA	-1.44944	1.54064	0.101095	0.166967	0.565176	0.90928	-0.545784	0.999774	0.297804	0.745024	-0.0612977	1.5872	1.25848	1.22349	-1.33066	0.304174
it_106	dsDNA	-1.22052	1.74068	0.0687601	0.112036	0.495593	1.23735	-0.502114	1.09271	0.200055	0.651	0.0411482	1.66862	1.3277	1.53863	-1.43545	0.29892
it_107	CCL11_HUMAN	-0.0987915	0.852368	0.683362	0.952691	-0.351465	1.2711	-1.51603	1.80666	0.54107	0.44132	0.740574	2.06697	0.937376	2.11543	1.14357	0.156352
it_107	CCL11_HUMAN	-0.405317	1.13215	0.651644	1.11003	-0.418683	1.43596	-1.73304	1.47183	0.364112	0.41338	0.79341	2.08325	1.01815	2.29912	1.5628	-0.157099
it_108	FDC	0.81809	-0.34658	-0.216751	0.424507	-0.0212587	-0.462593	-1.00294	0.50911	0.0724991	-0.442127	-0.441731	-0.84666	-0.0762765	-0.248106	-0.243988	-0.393201
it_108	FDC	0.798323	-0.394637	-0.20422	0.30928	-0.170083	-0.521062	-0.728819	-0.375203	0.109495	-0.412062	-0.539485	-0.764777	-0.0498575	-0.171708	-0.0836694	-0.692317
it_109	CSF2_HUMAN	-0.412217	0.800505	0.43361	0.955595	0.179839	1.41462	-3.66971	0.873322	0.497103	0.118895	-0.814812	1.98532	1.31291	5.09485	-0.508634	-0.216862
it_109	CSF2_HUMAN	0.0496302	0.705827	0.708229	1.38167	0.122742	2.24868	-3.24834	1.25358	0.866149	0.182317	-0.467333	1.74946	0.876296	5.37587	-0.430774	0.100254
it_110	HLA-ABC	-0.442274	1.74854	0.174211	-2.29188	0.76112	0.563488	-0.409488	2.59727	3.06737	1.12274	-1.78564	0.524359	0.399316	-0.29807	0.448055	-0.340574
it_110	HLA-ABC	-0.372757	1.95217	0.195978	-2.38381	0.665117	0.758105	-0.204441	2.96639	3.01143	1.5458	-1.78886	0.411239	0.268538	-0.00194339	0.534588	0.136371
it_111	HLA-class I	0.24446	0.408034	0.0527421	0.101835	0.230852	0.0494822	0.155187	-0.0123634	-0.0738684	0.0586425	0.152682	0.102036	0.119628	0.128271	0.0176472	0.080085
it_111	HLA-class I	0.301908	0.421578	0.0586074	-0.00728707	0.122278	0.00328974	0.218237	-0.0391477	0.0654785	0.0752514	0.0566401	0.08511	0.031143	0.0944857	0.0500516	0.485922
it_112	HLA class II	-0.103403	0.206329	-0.0383264	-0.0483633	-0.0969766	-0.336092	-0.00273982	-0.183052	-0.18741	-0.191881	-0.0253275	-0.0973119	-0.0407455	-0.0478418	0.121569	0.119663
it_112	HLA class II	0.0426592	0.245121	0.105098	0.155731	-0.210482	-0.295056	0.239059	-0.119692	-0.101824	-0.0995476	-0.00502526	-0.0922077	-0.182738	-0.0378568	0.376671	0.362008
it_113	HLA-DR	-0.213885	0.177705	-0.0404915	-0.354127	-0.410328	-0.163268	-0.177622	0.138146	-0.126678	-0.161884	-0.240624	-0.0265591	-0.273789	-0.14587	-0.341706	-0.16696
it_113	HLA-DR	-0.223885	-0.0338105	-0.0815248	-0.345221	-0.471688	-0.140649	0.182593	0.154436	0.0776528	-0.0952315	-0.274033	-0.051013	-0.236709	-0.407208	-0.40243	-0.179773
it_114	IFNA1_HUMAN	-0.126064	-0.133545	-0.185895	-0.19433	-0.158797	-0.109436	-0.257329	0.238952	0.00258607	-0.164543	-0.307258	-0.111607	-0.164295	-0.0806876	-0.221512	-0.116029
it_114	IFNA1_HUMAN	-0.0704783	-0.0992745	-0.197481	-0.0918996	-0.185412	-0.114076	-0.16981	0.460003	0.122688	0.0180842	-0.20572	-0.0396935	-0.211208	-0.0898388	-0.124464	0.108569
it_115	IFNG_HUMAN	-1.16487	0.430698	0.676407	-0.0839847	-2.38547	0.777615	-1.43129	0.211965	-2.01029	-0.303499	-0.999202	-0.279549	-0.707964	-0.115232	-4.654	-0.162684
it_115	IFNG_HUMAN	-0.876558	0.880907	0.760775	-0.0348854	-2.49004	0.775241	-1.31908	0.307608	-2.08801	-0.191014	-0.860769	-0.161534	-0.679678	-0.237146	-5.18644	-0.0962448
it_116	IL1B_HUMAN	-0.287703	0.0403255	-0.185143	-1.11525	0.0840194	0.187512	-0.548646	0.992247	1.27805	-0.0180661	-0.832985	0.0105598	0.0603063	-0.243039	-0.523575	-0.216052
it_116	IL1B_HUMAN	-0.198206	0.200603	-0.255989	-1.31186	-0.063947	0.138639	-0.196825	1.6143	1.69799	0.151574	-0.877573	0.0879804	-0.034351	-0.199345	-0.317979	-0.223496
it_117	IL2_HUMAN	-0.0203446	0.0658114	-0.0889323	-0.201296	0.0473958	0.17584	-0.0820046	1.17657	0.122336	0.0153414	-0.414447	0.096407	0.0699772	0.146871	-0.157886	0.289184
it_117	IL2_HUMAN	0.0208422	0.25313	-0.0916965	-0.123457	-0.0140651	0.0809947	-0.0648044	1.46303	0.396366	0.111331	-0.339673	0.127391	-0.0609765	0.218195	-0.057925	0.4065
it_118	IL6_HUMAN	0.0176196	-0.0186552	0.423753	-0.0476467	-0.0406466	-0.310001	0.671531	-0.213685	0.250749	0.242754	0.465434	0.378936	0.00775082	0.184046	0.566804	-0.0355758
it_118	IL6_HUMAN	0.274429	0.168864	0.430134	-0.0708953	-0.206419	-0.268036	1.2899	-0.332312	0.116867	0.193139	0.843221	0.684483	0.0936033	0.373963	1.0762	-0.0265234
it_119	IL7_HUMAN	-0.0404932	-0.160228	-0.092161	-0.0213444	0.0814178	-0.0422672	-0.137428	-0.178174	-0.102716	-0.0886927	-0.0201361	-0.0756252	0.0241528	0.0210217	-0.0752863	-0.0477374
it_119	IL7_HUMAN	-0.044997	-0.212939	-0.196494	-0.0388683	0.0520366	-0.042081	-0.0747102	-0.124793	-0.0201028	-0.0445326	0.0158903	-0.0140716	0.00639046	0.0491112	-0.0257273	-0.047042
it_120	IL8_HUMAN	-0.62013	0.981518	0.0195541	-1.76199	0.702684	0.612409	-1.0614	1.76715	2.0386	0.950083	-1.27598	0.170819	0.211742	-0.573999	0.069804	-0.40817
it_120	IL8_HUMAN	-0.591912	0.946889	0.0735121	-1.63803	0.296248	0.675971	-0.52824	2.51789	1.52145	1.39637	-1.59357	0.242266	0.0898959	-0.469704	0.011605	-0.528868
it_121	IL10_HUMAN	-2.761	1.48983	-0.309969	-0.525031	-0.989724	1.46542	-1.06424	2.45002	-0.701525	0.525536	-0.505611	2.36265	-0.515123	1.12925	-1.86175	1.62993
it_121	IL10_HUMAN	-2.14309	1.65	-0.62121	-0.774326	-0.777594	1.441	-1.07053	2.46401	-0.751047	0.511334	-0.294527	2.28228	-0.438271	1.18936	-1.88852	1.55967
it_122	IL15_HUMAN	0.146287	0.0786161	0.144941	0.233814	0.204458	-0.200132	0.410106	0.369154	0.138791	-0.0380454	0.605373	0.139617	0.0940662	0.104359	0.379871	0.0232548
it_122	IL15_HUMAN	0.0486332	0.0721581	0.156181	0.299785	0.171803	-0.097024	0.510542	0.427243	0.267572	-0.00575908	0.636035	0.164137	-0.00910834	0.228767	0.440749	0.0366014
it_123	IL18_HUMAN	-0.27927	0.19974	-0.011318	-0.972884	0.279346	0.36738	-0.222569	1.87077	1.11489	0.192966	-0.766975	0.209481	0.172354	0.123012	-0.154102	-0.0156763
it_123	IL18_HUMAN	-0.0967408	0.236117	-0.076413	-0.86446	0.2175	0.229165	-0.0154308	2.25763	1.21557	0.370914	-0.606621	0.214515	0.00743942	0.139479	0.0127158	0.135834
it_124	FCERA_HUMAN	-2.43318	1.6804	-1.07624	-0.7951	1.68834	0.0466335	-0.168486	0.148375	0.60613	0.458601	0.00162563	0.545935	1.21039	-1.72422	-2.28502	0.034914
it_124	FCERA_HUMAN	-2.08069	2.37471	-1.00673	-0.632012	1.54814	0.255865	0.341381	-0.127264	0.557051	0.505586	-0.0334868	0.688554	0.673506	-2.05053	-2.16548	0.0541209
it_125	CCL3_HUMAN	0.373955	0.0578745	0.18933	0.148457	-0.389418	-0.402474	0.429705	-0.525308	-0.221356	-0.589619	-0.0249434	-0.719744	-0.356233	-0.231743	0.175656	0.0582179
[truncated: 59 more rows]
